# Supplementary material for: RNA Methyltransferase METTL16’s Protein Domains Have Differential Functional Effects on Cell Processes
Source: MDPI journal article supplement (doi:10.3390/cimb45070346), 2023-06-29

Figure 1B: METTL16

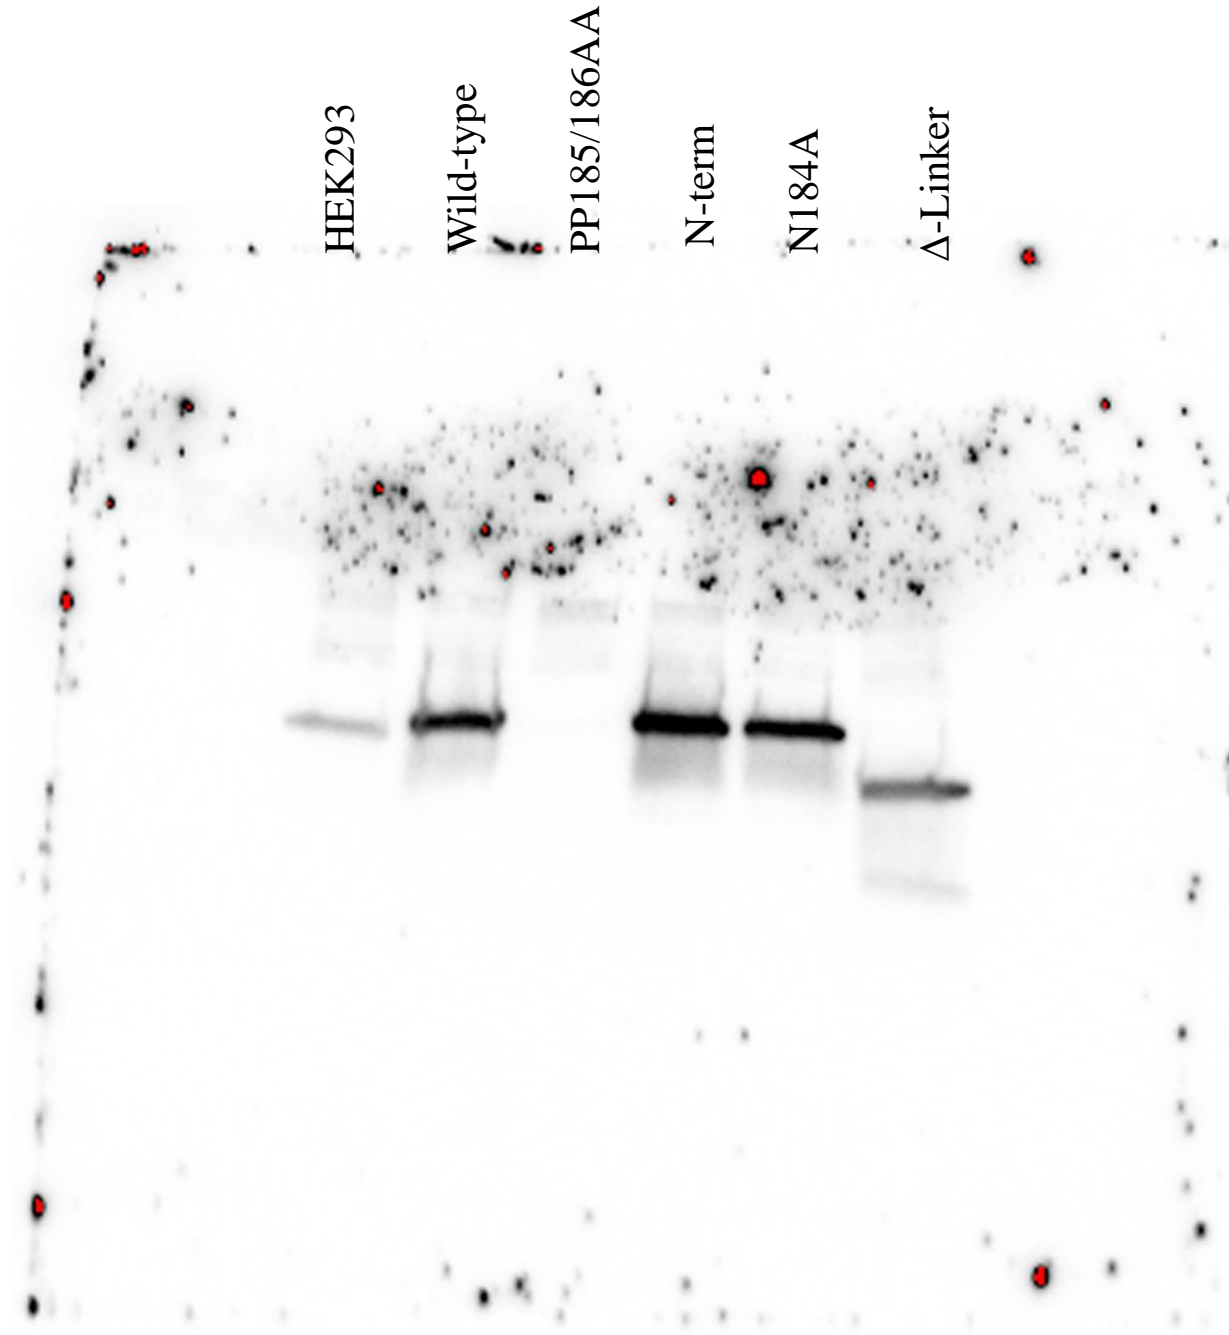

Figure 1B:  $\gamma$ -tubulin

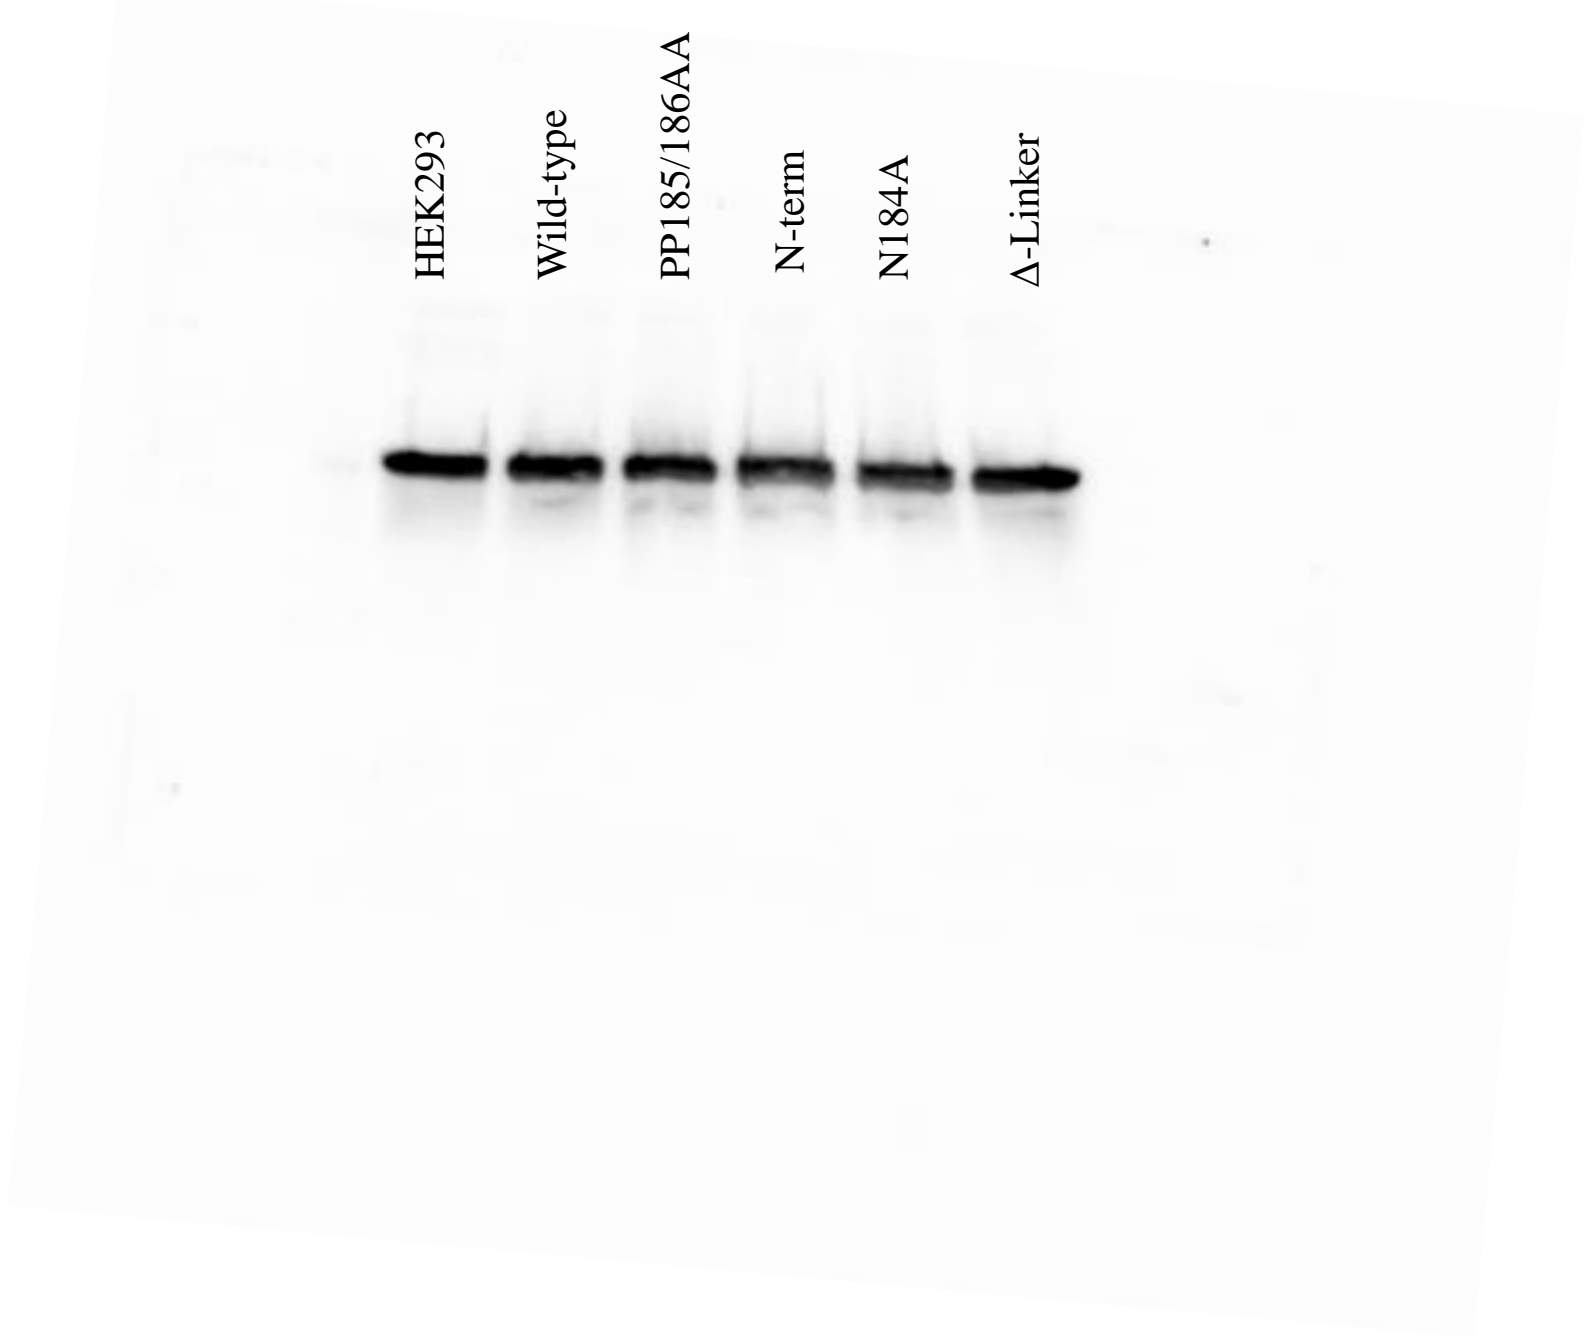

Figure 1B: MAT I/IIA

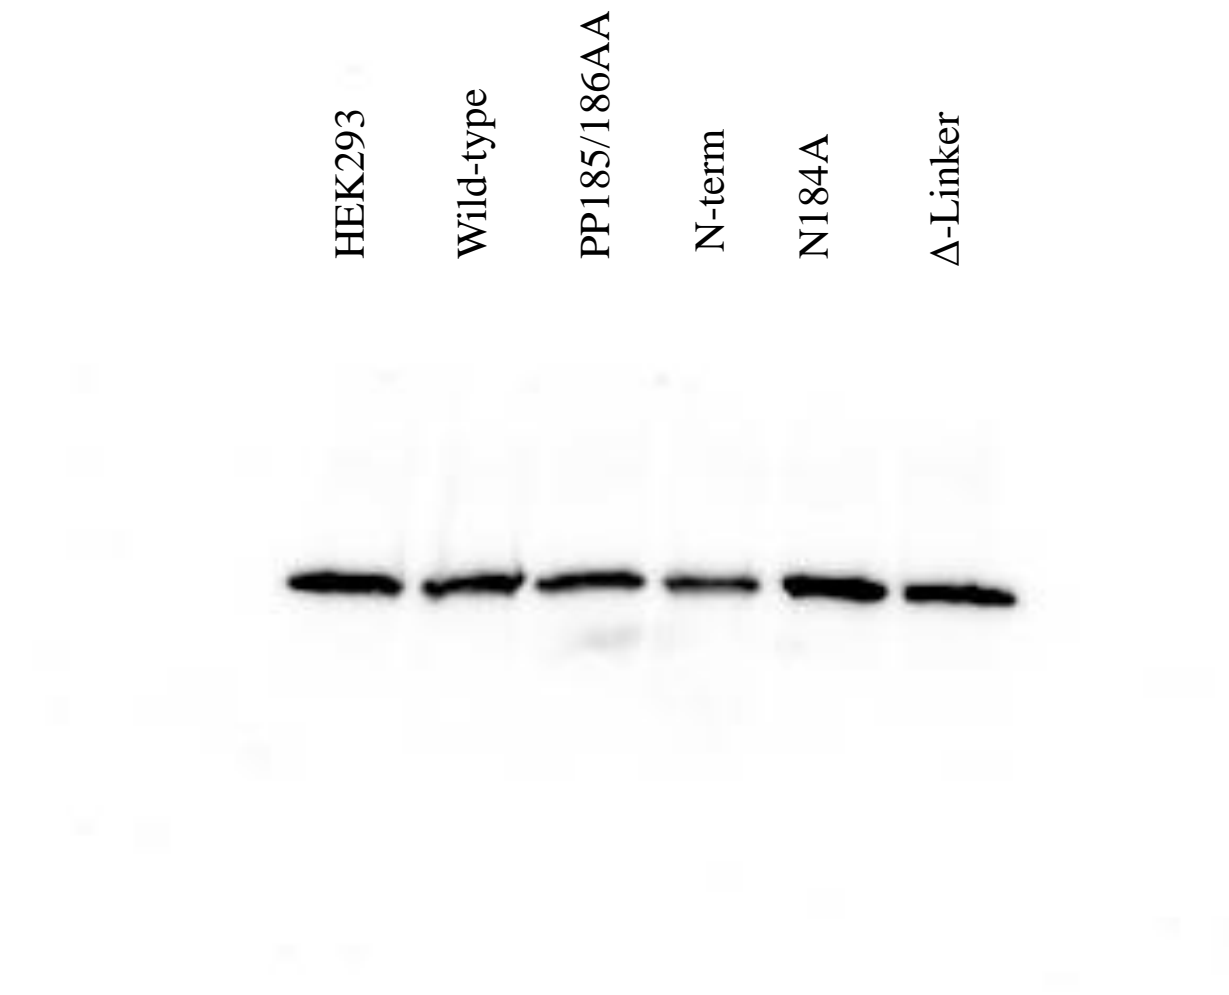

Figure 1C: METTL16

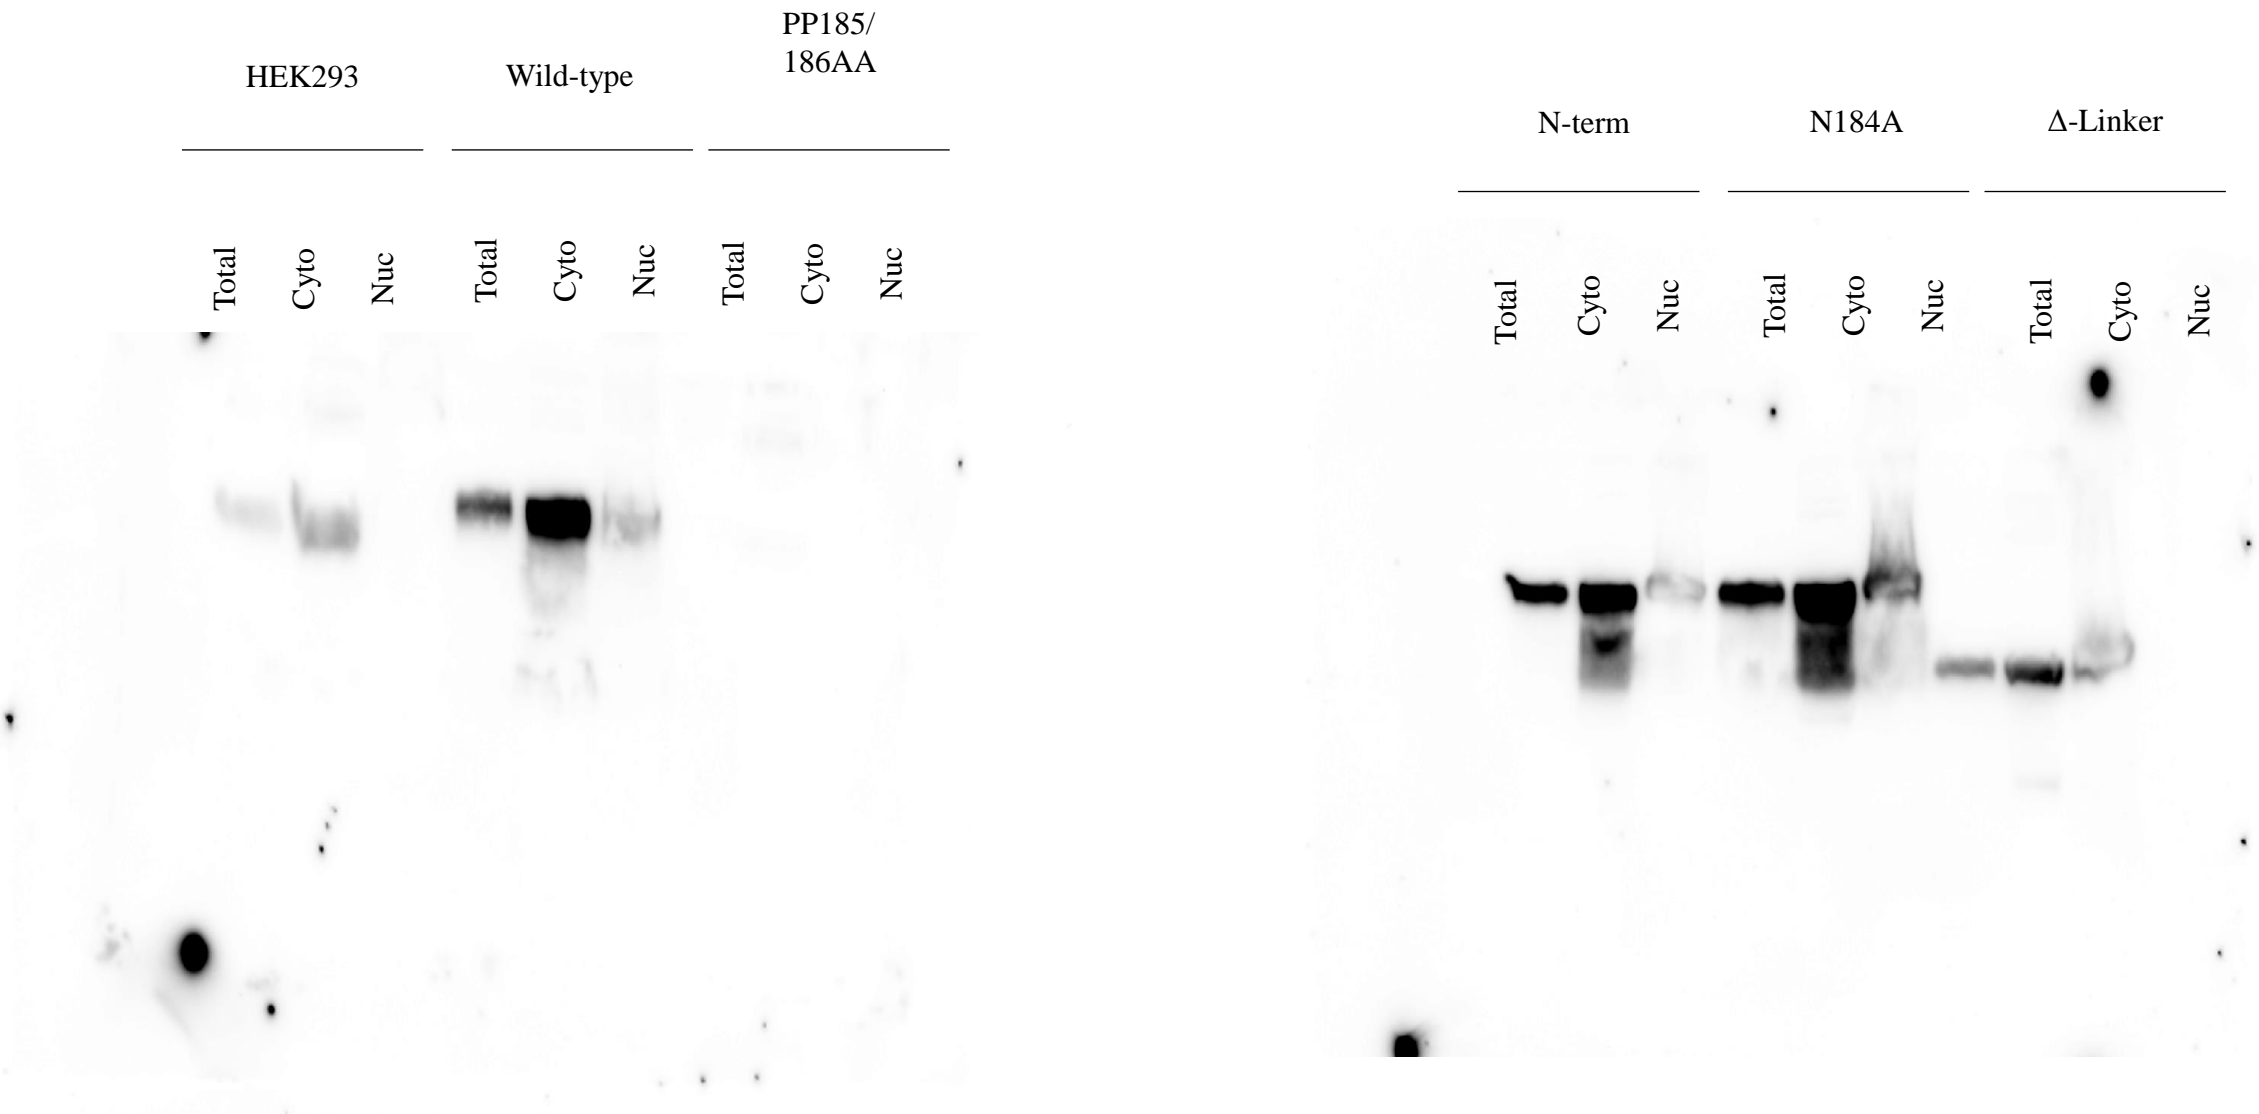

Figure 1C: Lamin B

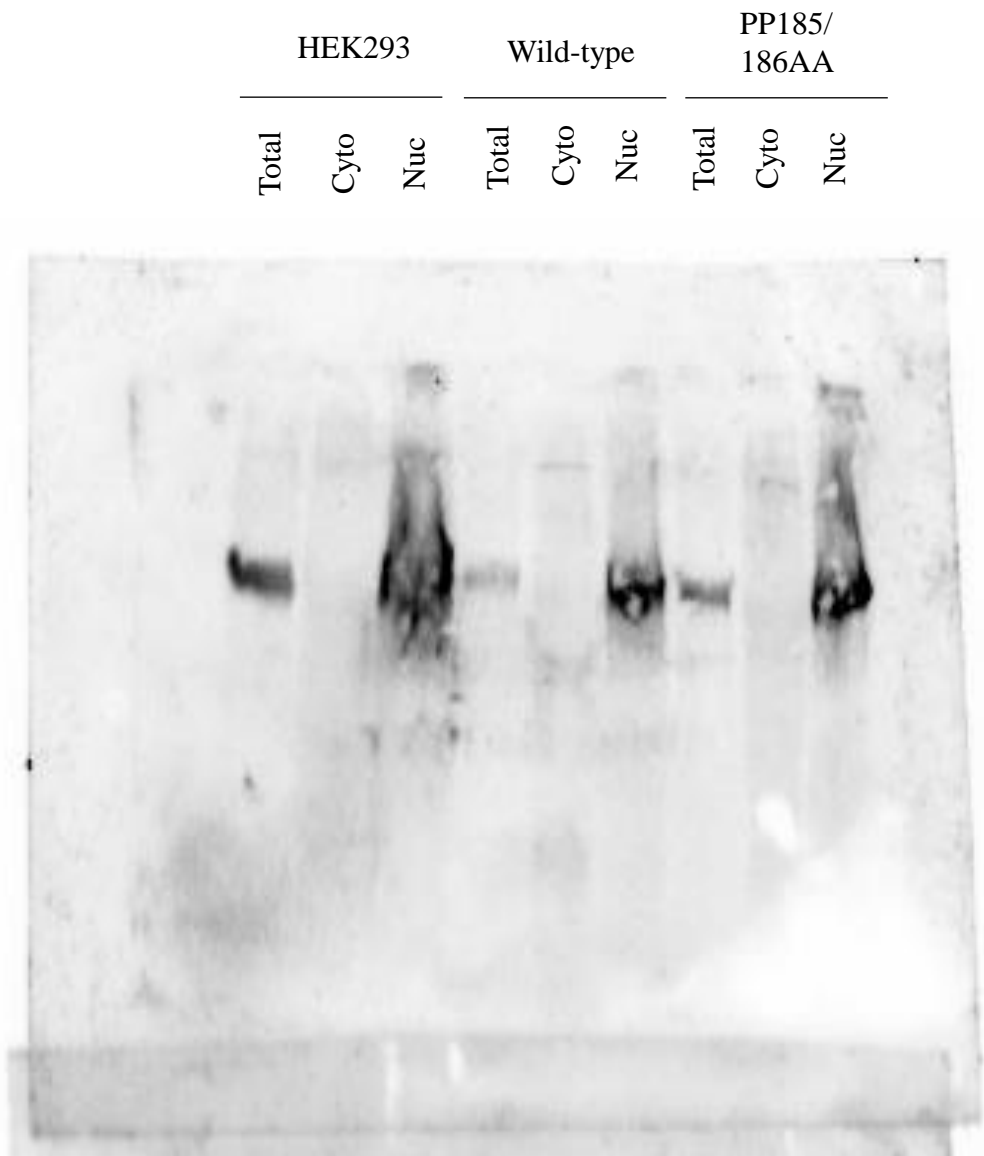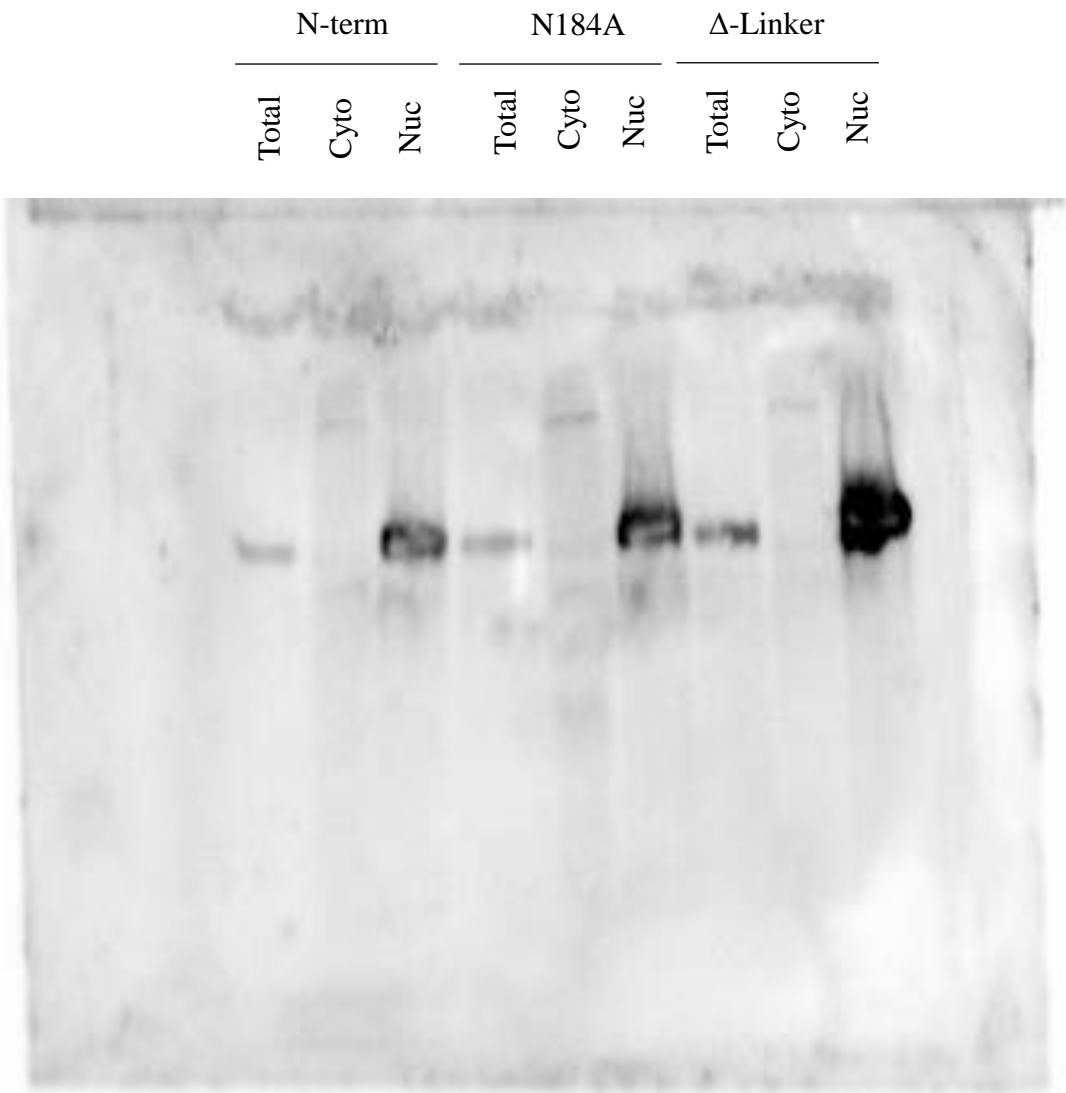

Figure 1C: LDH

| HEK293 |      |     | Wild-type |      |     | PP185/<br>186AA |      |     |
|--------|------|-----|-----------|------|-----|-----------------|------|-----|
| Total  | Cyto | Nuc | Total     | Cyto | Nuc | Total           | Cyto | Nuc |

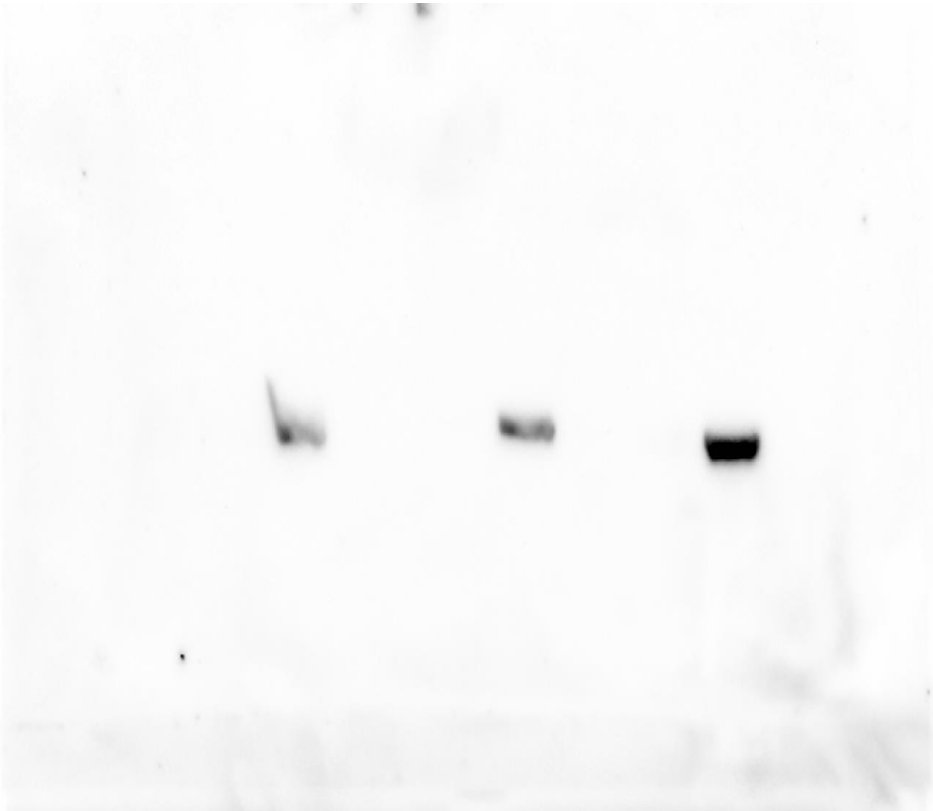

| N-term |      |     | N184A |      |     | $\Delta$ -Linker |      |     |
|--------|------|-----|-------|------|-----|------------------|------|-----|
| Total  | Cyto | Nuc | Total | Cyto | Nuc | Total            | Cyto | Nuc |

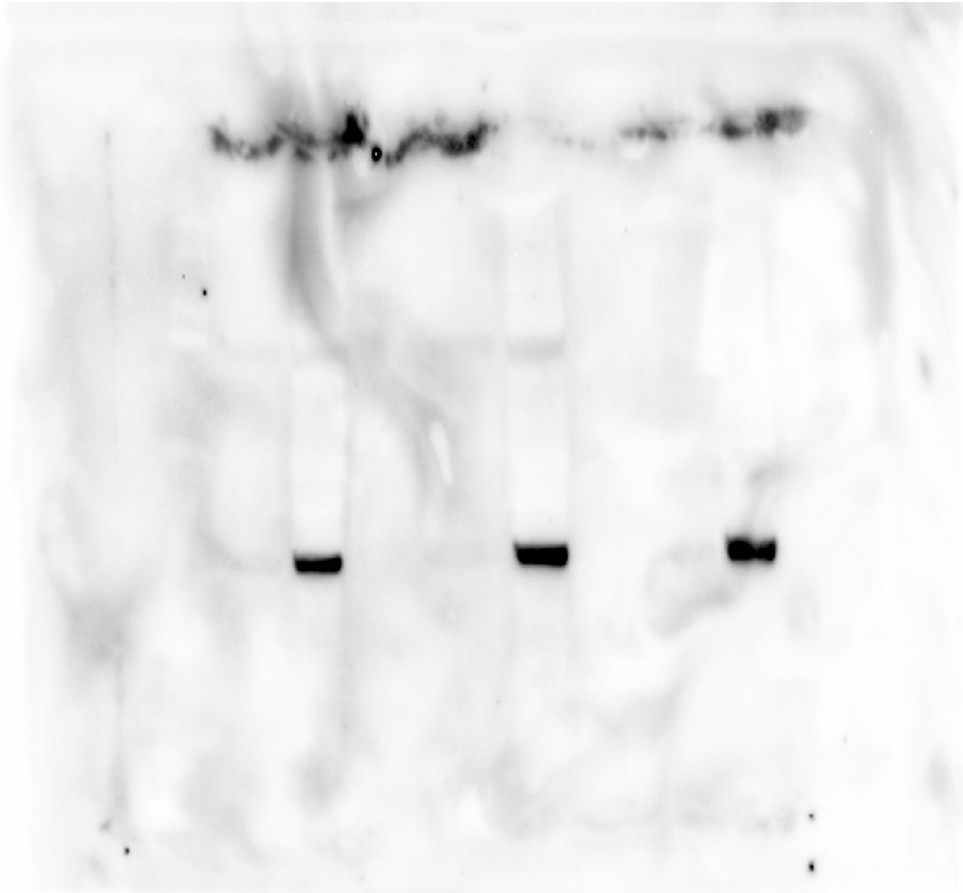

Figure 1D: HEK293

METTL16

0 hr  
1 hr  
2 hr  
4 hr  
16 hr

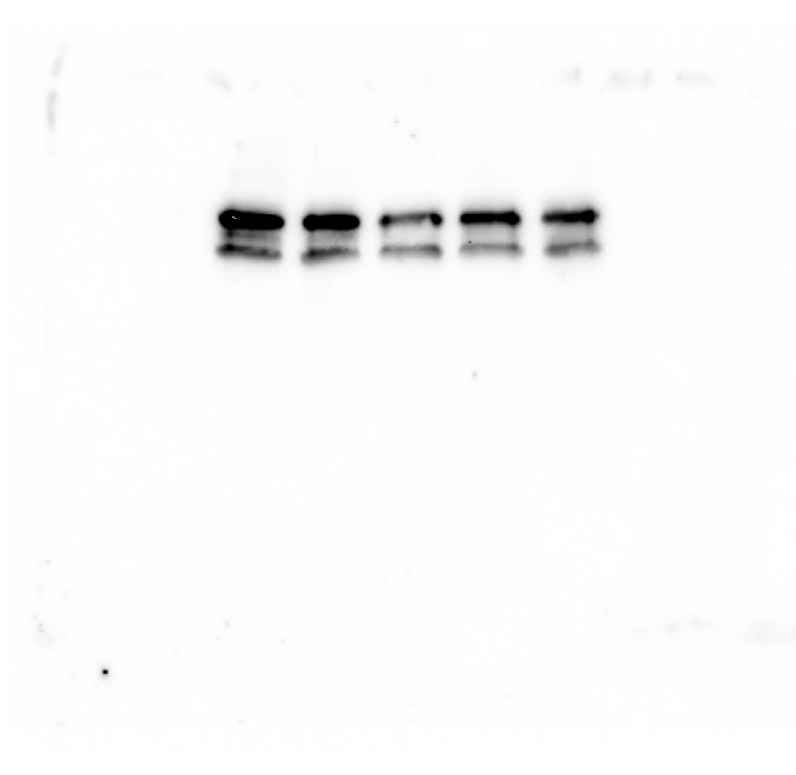

B-Catenin

0 hr  
1 hr  
2 hr  
4 hr  
16 hr

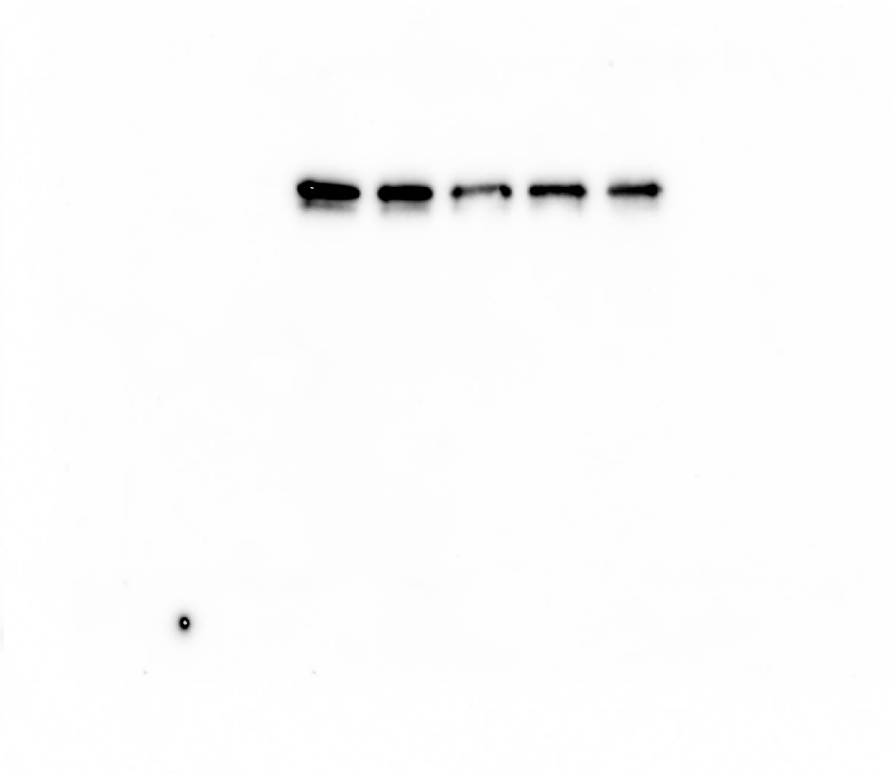

$\gamma$ -Tubulin

0 hr  
1 hr  
2 hr  
4 hr  
16 hr

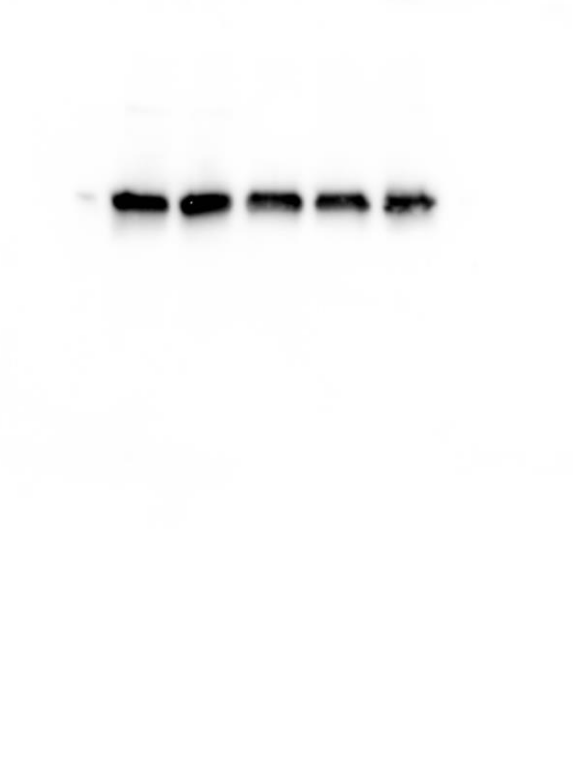

Figure 1D: Wild-type

METTL16

0 hr  
1 hr  
2 hr  
4 hr  
16 hr

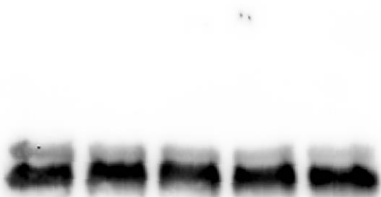

B-Catenin

0 hr  
1 hr  
2 hr  
4 hr  
16 hr

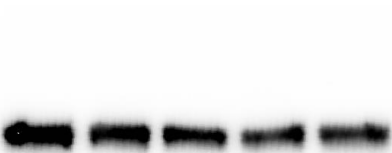

$\gamma$ -Tubulin

0 hr  
1 hr  
2 hr  
4 hr  
16 hr

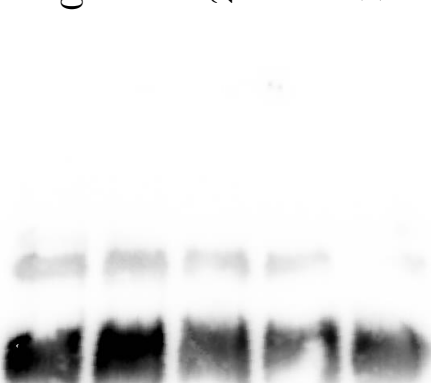



Figure 1D: PP185/186AA

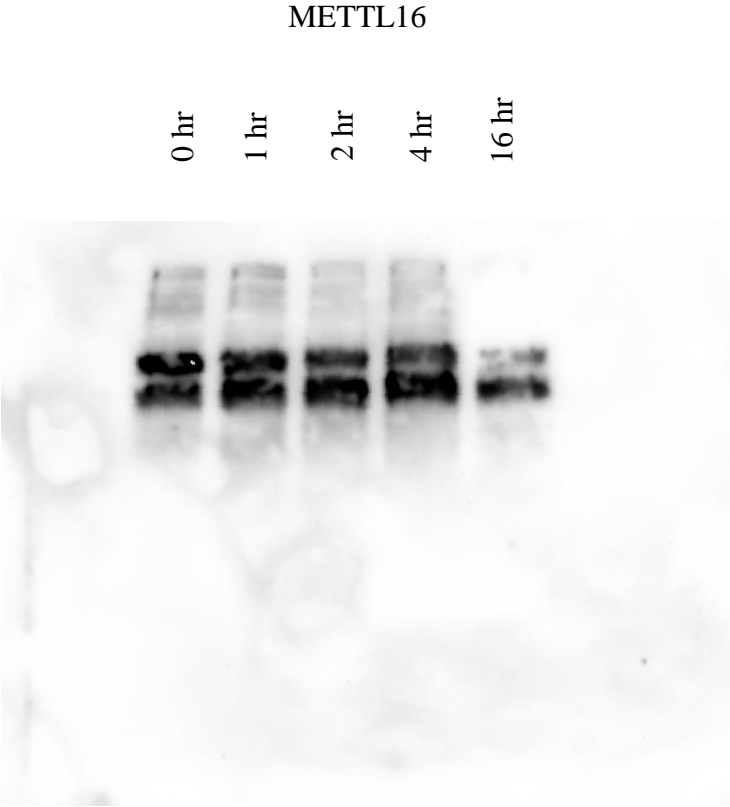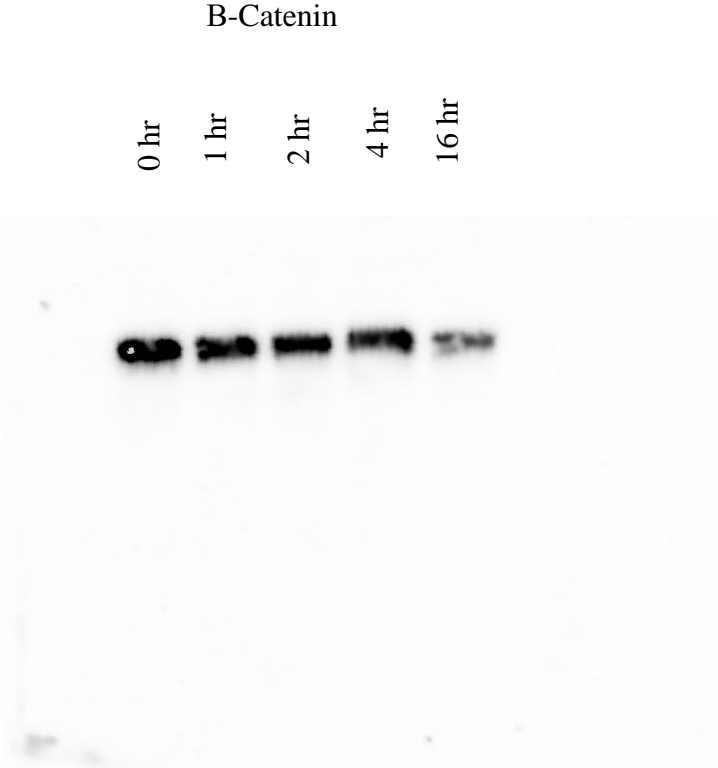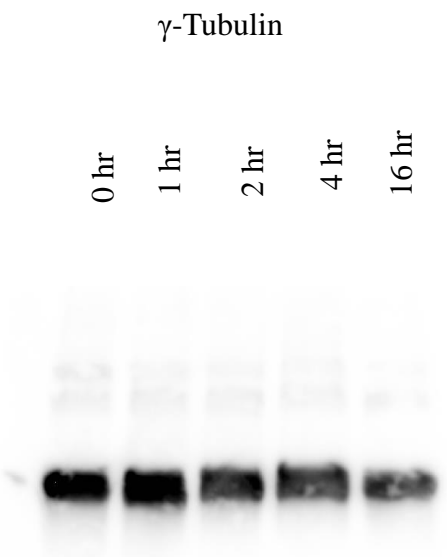

Figure 1D: N-term

METTL16

0 hr    1 hr    2 hr    4 hr    16 hr

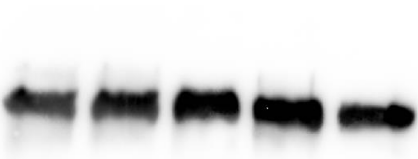

B-Catenin

0 hr    1 hr    2 hr    4 hr    16 hr

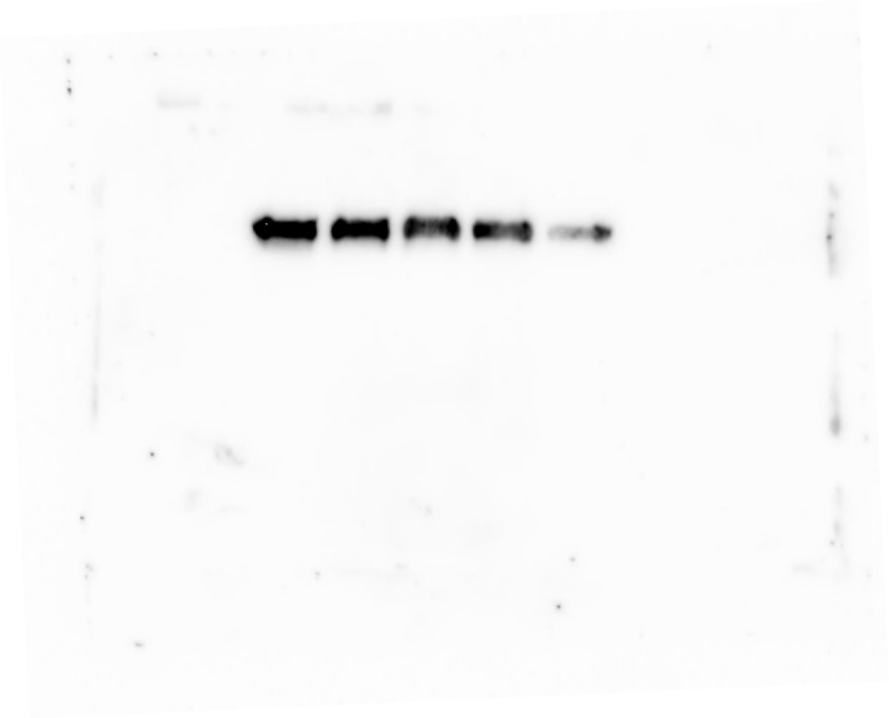

$\gamma$ -Tubulin

0 hr    1 hr    2 hr    4 hr    16 hr

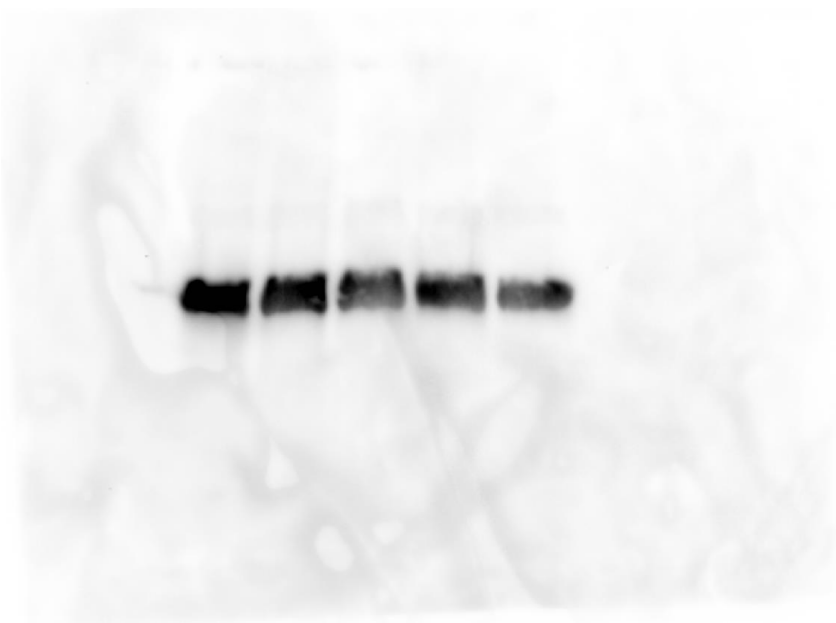

Figure 1D: N184A

METTL16

0 hr  
1 hr  
2 hr  
4 hr  
16 hr

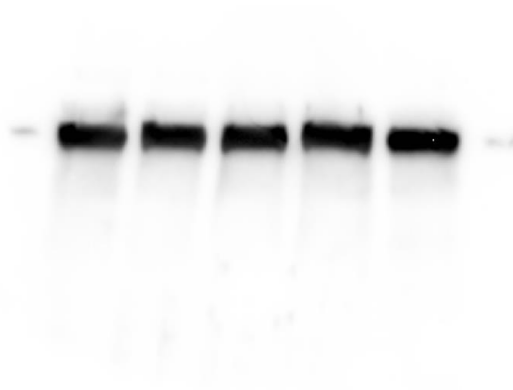

B-Catenin

0 hr  
1 hr  
2 hr  
4 hr  
16 hr

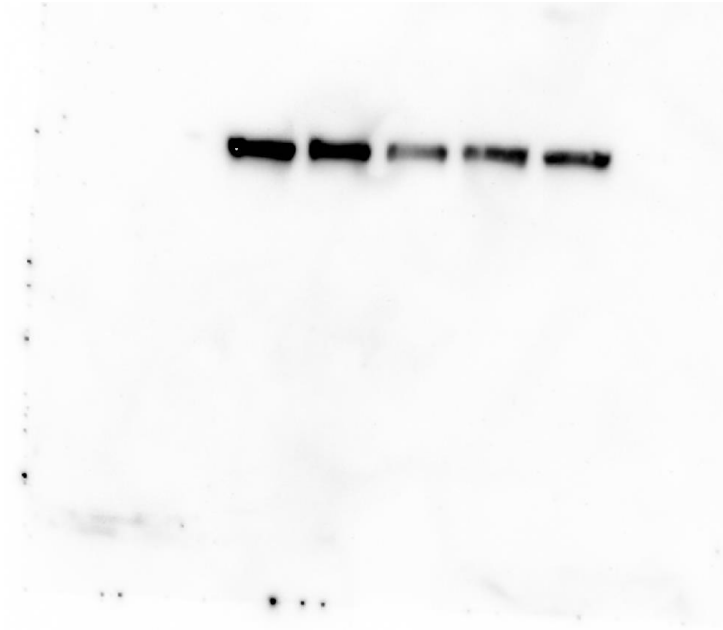

$\gamma$ -Tubulin

0 hr  
1 hr  
2 hr  
4 hr  
16 hr

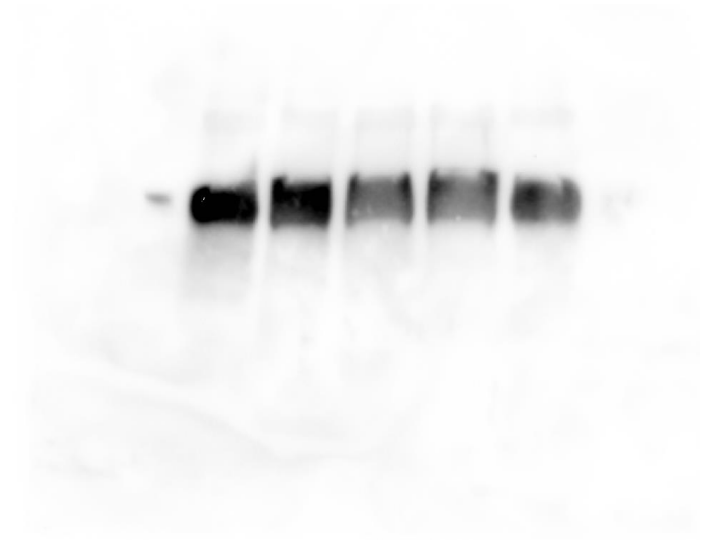

Figure 1D: Δ-Linker

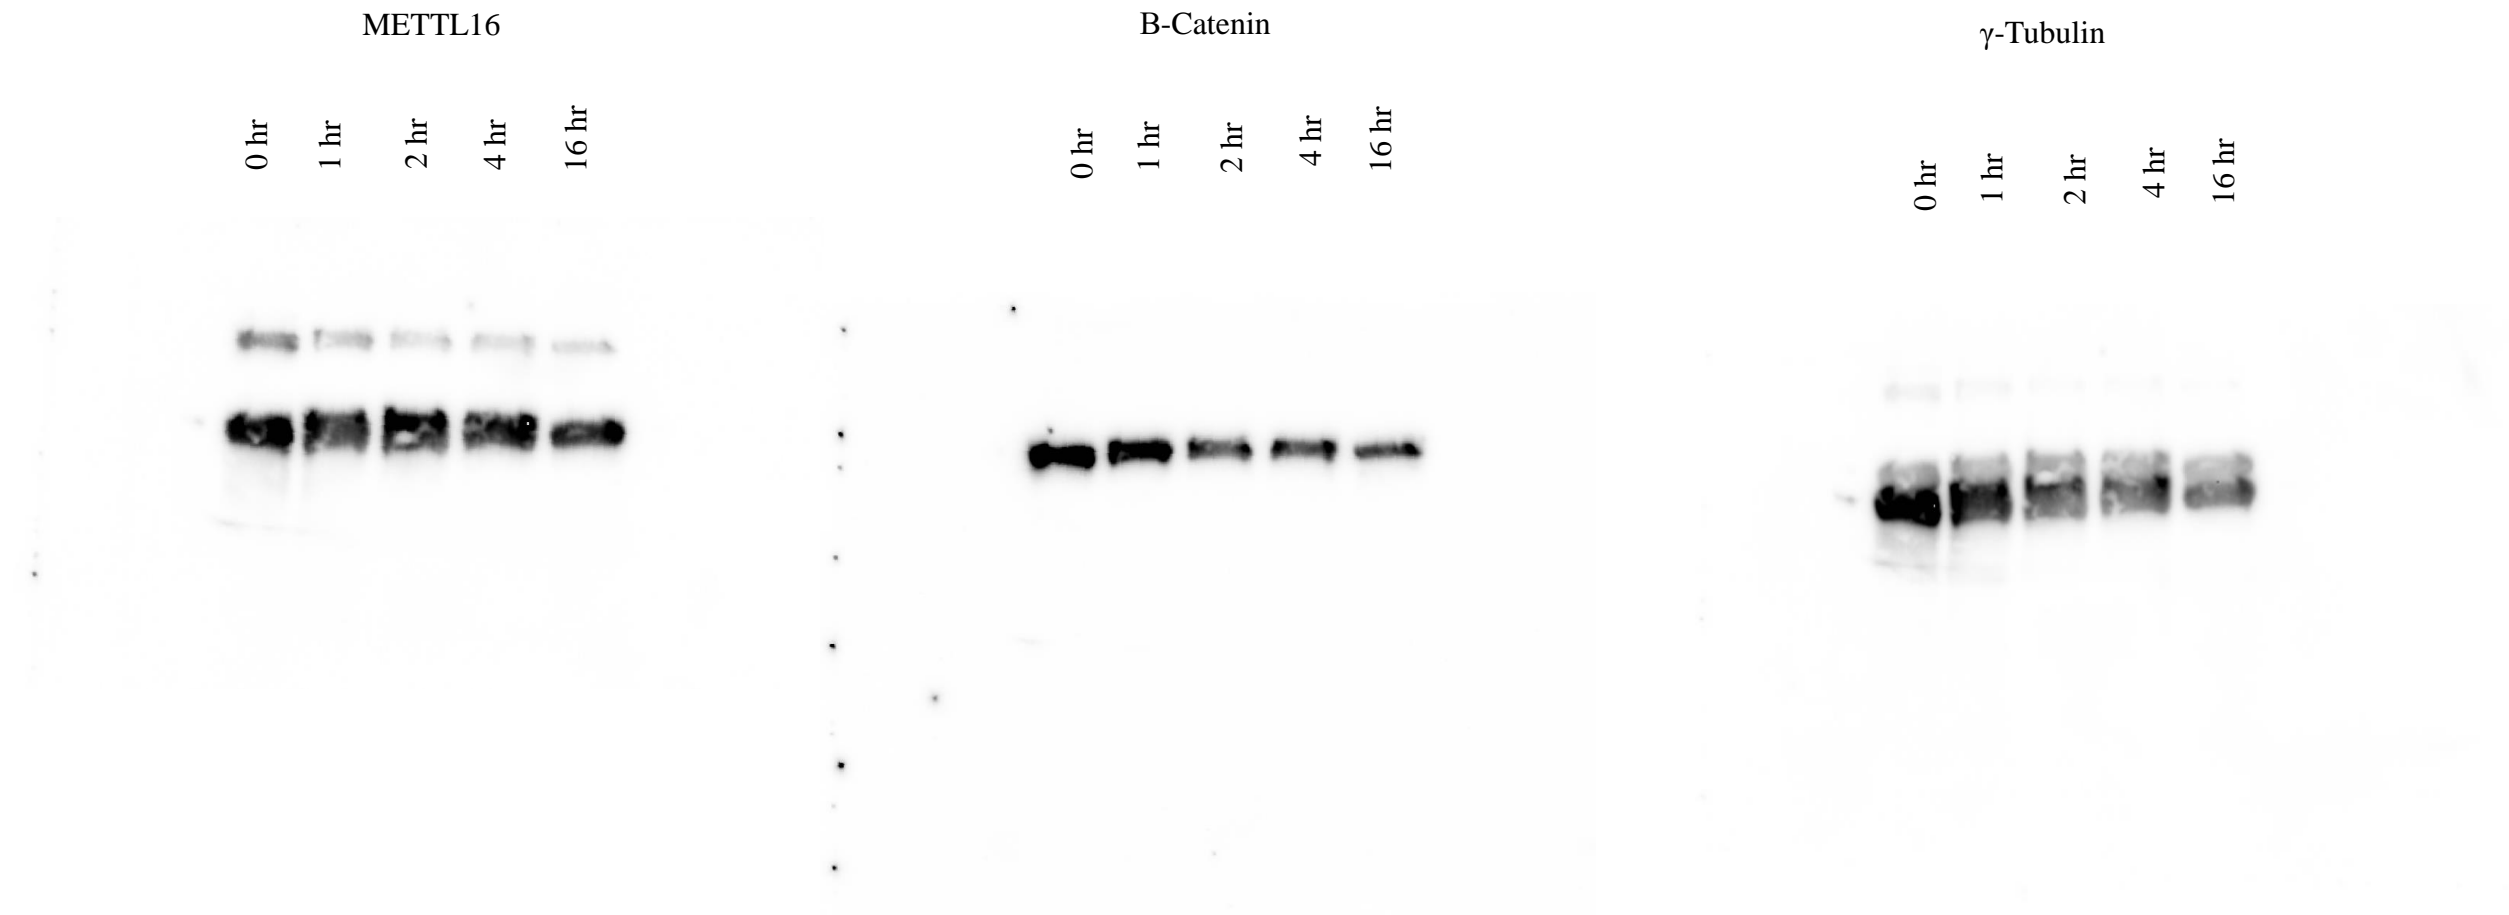

Supplement: s1 [file s1]
