# Supplementary material for: RNA Methyltransferase METTL16’s Protein Domains Have Differential Functional Effects on Cell Processes
Source: MDPI journal article supplement (doi:10.3390/cimb45070346), 2023-06-29
Supplement: s1 [file s1]

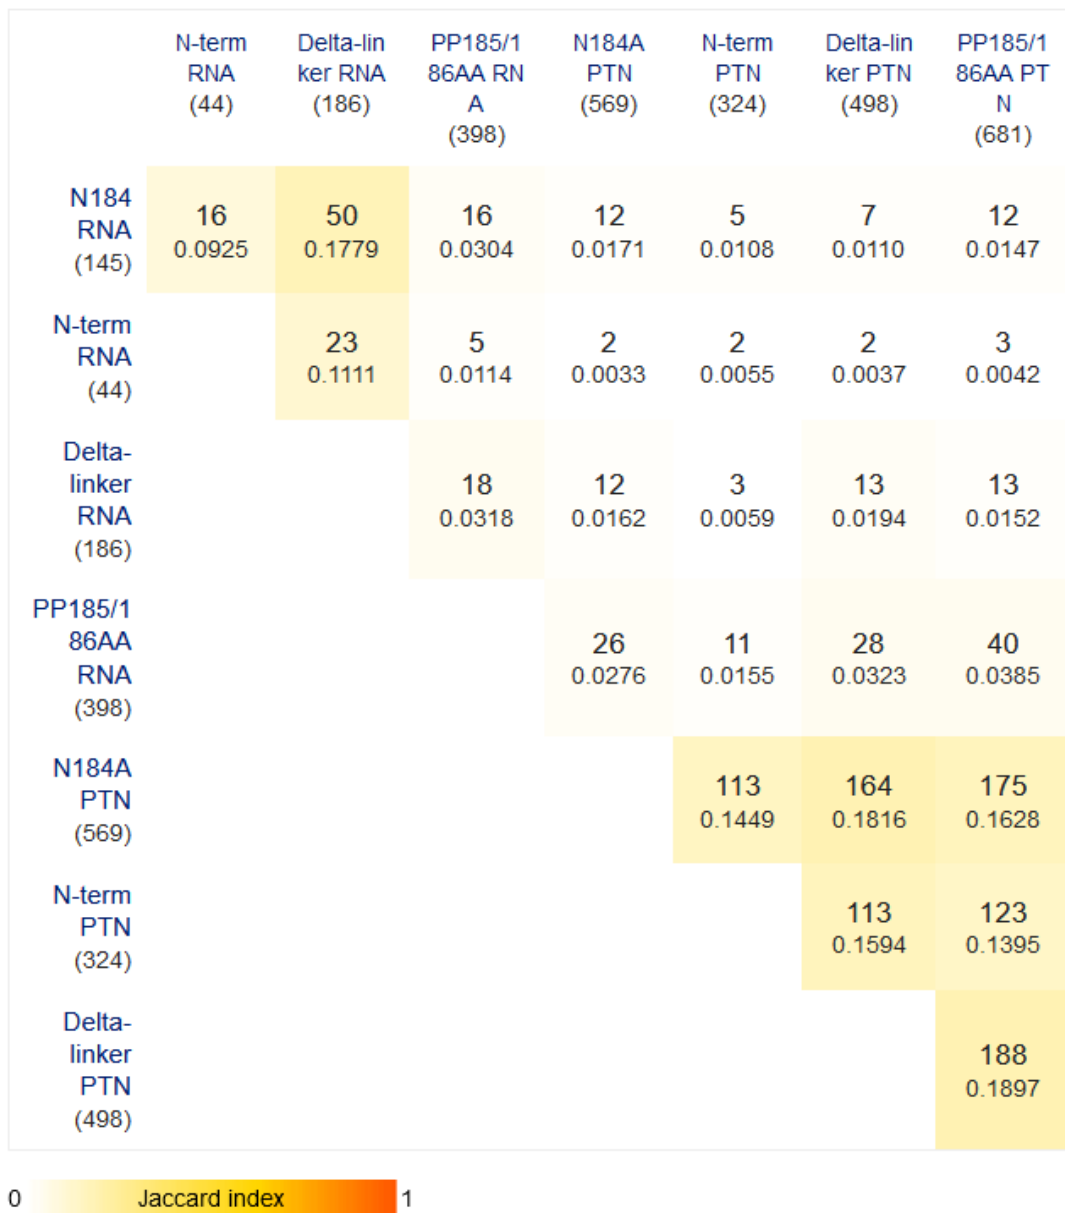

**Supplemental Figure 3:** Correlation Matrix of Deep Sequencing and Proteomics data. Correlation of significantly changed genes (number in parenthesis) from either deep sequencing (RNA) or proteomics (PTN) analysis. Top number in matrix box indicates number of shared gene symbols while bottom number is the Jaccard similarity coefficient.
