# Supplementary material for: RNA Methyltransferase METTL16’s Protein Domains Have Differential Functional Effects on Cell Processes
Source: MDPI journal article supplement (doi:10.3390/cimb45070346), 2023-06-29
Supplement: s1 [file s1]

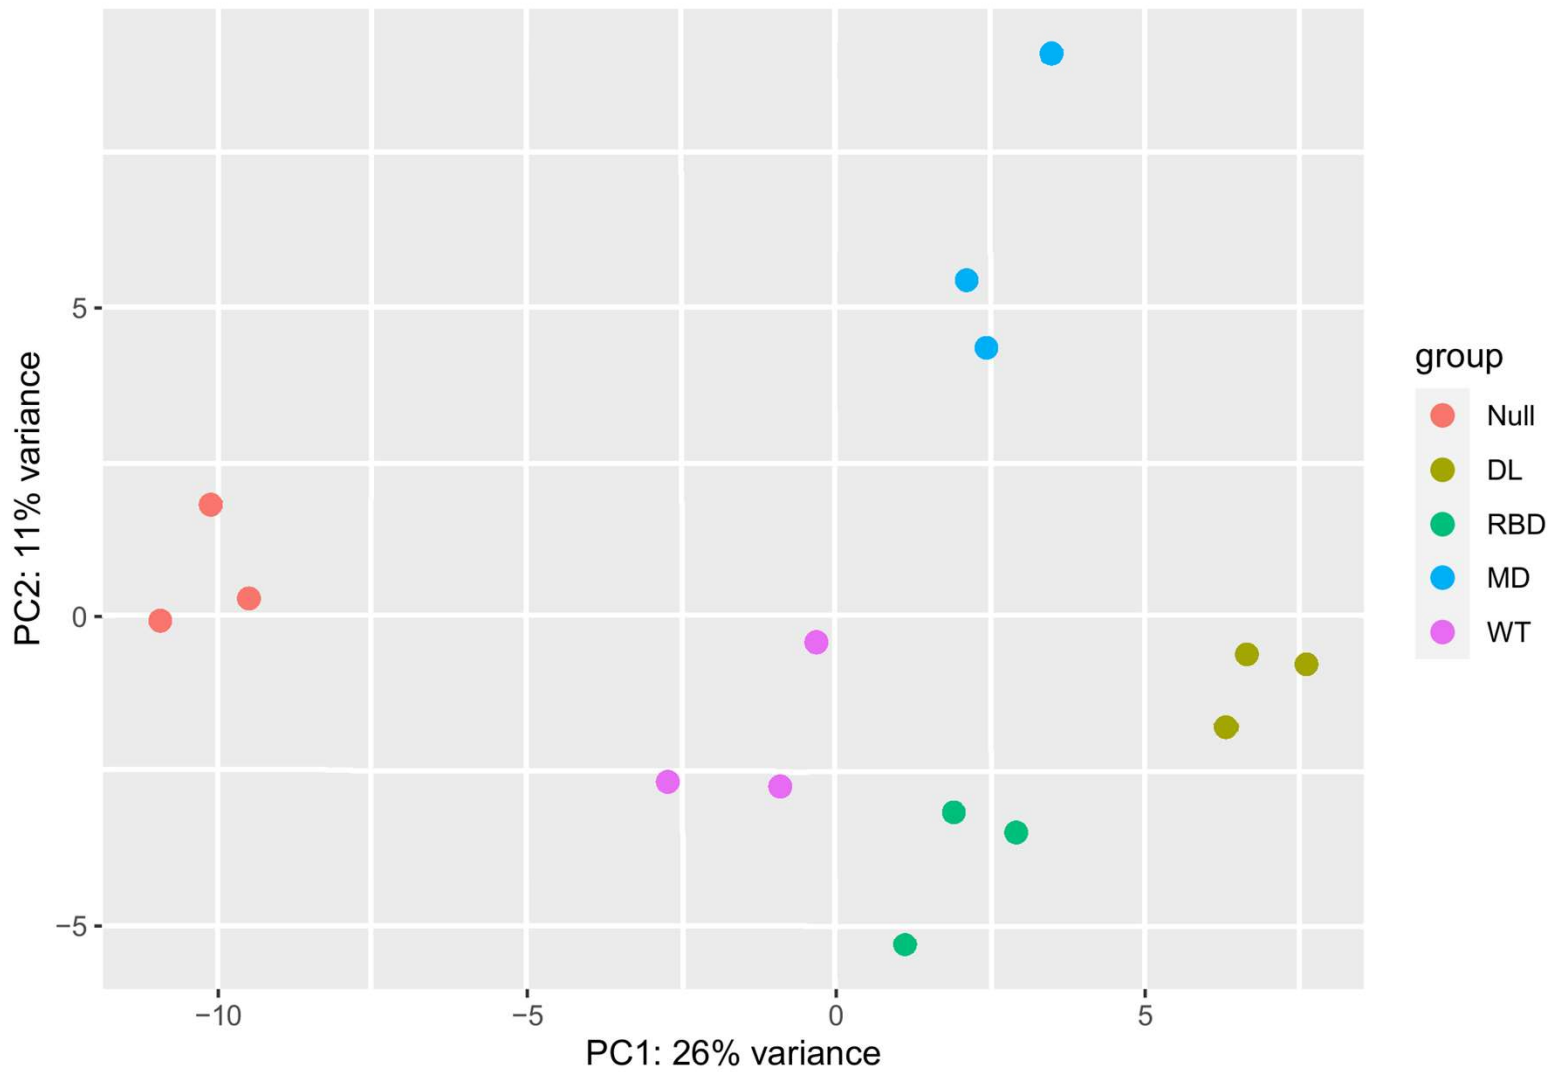

**Supplemental Figure 2:** Principal Component Analysis of deep sequencing data. Each colored circle represents individual sample. Lines tested included Null: PP185/186AA mutant; DL: Delta Linker mutant; RBD: N-terminal RNA Binding Domain mutant; MD: N184A methylation domain mutant; WT: Wild type METTL16.
