# Supplementary material for: RNA Methyltransferase METTL16’s Protein Domains Have Differential Functional Effects on Cell Processes
Source: MDPI journal article supplement (doi:10.3390/cimb45070346), 2023-06-29
Supplement: s1 [file s1]

**Supplemental Table 1: Antibodies used in this study**

| <b>Antibody</b>       | <b>Vendor</b>            | <b>Catalog #</b> | <b>Dilution</b> |
|-----------------------|--------------------------|------------------|-----------------|
| γ-Tubulin             | Thermo Fisher            | MA1-850          | 1:1000 (WB)     |
| Lactate Dehydrogenase | Santa Cruz Biotechnology | SC-133123        | 1:250 (WB)      |
| Lamin B               | Santa Cruz Biotechnology | SC-6216          | 1:200 (WB)      |
| MAT Iα/IIα            | Santa Cruz Biotechnology | SC-166452        | 1:500 (WB)      |
| METTL16               | Bethyl Laboratories      | A304-192A        | 1:2000 (WB)     |

**Supplemental Table 2: PCR primers used to produce mutations in METTL16 sequence-containing plasmid**

| <b>METTL16 Mutant</b>   | <b>Site-Directed Mutagenesis Forward Sequence</b> | <b>Site-Directed Mutagenesis Reverse Sequence</b> |
|-------------------------|---------------------------------------------------|---------------------------------------------------|
| CRISPR-Resistant        | caacctcaacGGAAGAGTGAGCCTTAATTTTAAAG               | attgcacgtgCTGCTTAAAATCTGGATATTG                   |
| N-terminal RNA binding  | aatgcatacgcgagcgaCCTCCTGACTTTGCATATCTG            | tgctgcatgcattgatgcACTCAGAGCCATGGCGAT              |
| PP185/186AA Methylation | CATGTGCAACgcagccTTTTTGCCAATC                      | CAAAAGTCATAGATTATCTCAGATTC                        |
| N184A Methylation       | TTGCATGTGCcgcCCTCCCTTTTTTG                        | AAGTCATAGATTATCTCAGATTCTTC                        |
| Δ-Linker                | GGAGTGGCCGGACAGTAC                                | CTTTTCTCTTCCAAGGCCTGAATG                          |

**Supplemental Table 3: Plasmids and guide RNA sequences used in this study**

| <b>Plasmid</b>   | <b>gRNA sequence</b>   | <b>Catalog #</b>         |
|------------------|------------------------|--------------------------|
| Scrambled CRISPR | GGCTTCGCGCCGTAGTCTTA   | CS-CCPCTR01-CG12-01-10   |
| METTL16 CRISPR   | CATG TTCAGATAAAATCTGAA | CS-HCP218894-CG12-3-10-A |
| METTL16 ORF      | -                      | RC208648                 |

**Supplemental Table 4: Real-time PCR primers used in this study**

| <b>Gene</b> | <b>Forward (5'-3')</b>    | <b>Reverse (5'-3')</b>     |
|-------------|---------------------------|----------------------------|
| ATXN10      | GATACGATTGGTGTGCTGTTG     | GTCTATTGTTTGGGTGCATGC      |
| CCND1       | CATCTACACCGACAACCTCCATC   | CGGATGATCTGTTTGTTCTCCT     |
| CDKN3       | CCCAAACCTTCTGGATCTCTAC    | TATGGAGGACTTGGGAGATCT      |
| GPR50       | GAATACCCACCGGCTCTAATC     | TCTTCGTGGTCAGTCTCTCT       |
| MALAT1      | GAATTGCGTCATTTAAAGCCTAGTT | GTTTCATCCTACCACTCCCAATTAAT |
| MAT2A       | CTGCTGTTGACTACCAGAAAGT    | GCTACCAGCACGTTACAAGT       |
| MYC         | GCTGCTTAGACGCTGGATTT      | GAGTCGTAGTCGAGGTCATAGTT    |
| PNPLA4      | CGTTGGTTGCTTCTGTTCTG      | GACTAAGAAGTGGGATGGAGTC     |
| RHO D       | GCAGGGCAAGATGACTATGA      | CAAGAAGGTACCCATCATCGT      |
| RTRAF       | ACAGGATGCAGTTGCTAAGG      | TAGCTCTCTGAGCTCCTCTATG     |
| U1          | CCATGATCACGAAGGTGGTTT     | ATGCAGTCGAGTTTCCCACAT      |
| U6          | CTCGCTTCGGCAGCACA         | AACGCTTCACGAATTTGCGT       |
| UBE2C       | GCAGTTGCAGTCGTGTTCTC      | TACAGCAGGAGCTGATGACC       |
