# Supplementary material for: RNA Methyltransferase METTL16’s Protein Domains Have Differential Functional Effects on Cell Processes
Source: Curr Issues Mol Biol. 2023 Jun 29;45(7):5460–80. doi: 10.3390/cimb45070346 (PMC10378215; doi:10.3390/cimb45070346)
Supplement: Supplementary file 1 [file cimb-45-00346-s001.zip]

Archive with 7 entries (7 files):
- Supplemental Dataset 1_DeepSeq_FoldChange.xlsx
- Supplemental Dataset 2_MassSpec_FoldChange.xlsx
- Supplemental Figure 1_Western blot of clonal METTL16 expression.pdf
- Supplemental Figure 2_PCA Analysis.pdf
- Supplemental Figure 3_Sequencing_Proteomics_correlation.pdf
- Supplemental Figure 4_Original Western Blots.pdf
- Supplemental Tables 1-4.pdf
