# Supplementary material for: RNA Methyltransferase METTL16’s Protein Domains Have Differential Functional Effects on Cell Processes
Source: Curr Issues Mol Biol. 2023 Jun 29;45(7):5460–80. doi: 10.3390/cimb45070346 (PMC10378215; doi:10.3390/cimb45070346)
Supplement: Supplementary file 1 [file cimb-45-00346-s001.zip › Supplemental Dataset 1_DeepSeq_FoldChange.xlsx]

## Sheet: FoldChange vs. WT
GeneID	GENE	Base mean	PP185/186AA_FC	PP185/186AA_padj	N184A_FC	N184A_padj	N-term_FC	N-term_padj	DeltaLinker_FC	DeltaLinker_padj
ENSG00000000003	TSPAN6	355.881	0.267056	0.345639	0.052062	0.97483	0.501724	0.0663788	-0.0964961	0.999338
ENSG00000000005	TNMD	0	NA	NA	NA	NA	NA	NA	NA	NA
ENSG00000000419	DPM1	332.078	0.204208	0.556668	0.181839	0.825776	0.415046	0.326981	0.548565	0.00919092
ENSG00000000457	SCYL3	23.7693	-0.300216	0.768905	-0.0632409	0.987637	0.062758	1	0.250296	0.991535
ENSG00000000460	C1orf112	107.548	-0.21343	0.861407	-0.487745	0.764514	0.146365	1	-0.687209	0.52568
ENSG00000000938	FGR	0	NA	NA	NA	NA	NA	NA	NA	NA
ENSG00000000971	CFH	0.290169	0.0867906	NA	0.0791536	NA	0.0818079	NA	0.0811139	NA
ENSG00000001036	FUCA2	160.168	0.235897	0.6602	0.50772	0.258941	0.653356	0.139456	0.567212	0.149226
ENSG00000001084	GCLC	40.4831	-0.526776	0.503445	-0.125191	0.97483	-0.118435	1	-0.0980726	0.999338
ENSG00000001167	NFYA	102.913	0.440665	0.473514	0.472644	0.631803	0.142775	1	0.405565	0.81685
ENSG00000001460	STPG1	40.3524	-0.188925	0.876286	0.454885	0.781387	0.155875	1	0.268583	0.976063
ENSG00000001461	NIPAL3	76.3758	0.421182	0.604037	0.245171	0.94556	-0.210475	1	0.225463	0.993615
ENSG00000001497	LAS1L	347.812	0.160215	0.80643	0.0911274	0.96813	0.214885	1	0.209553	0.951969
ENSG00000001561	ENPP4	32.8655	0.585243	0.286251	0.292293	0.891236	0.221376	1	-0.0205408	1
ENSG00000001617	SEMA3F	3.07446	-0.0625965	NA	0.175522	NA	-0.016845	1	0.146988	0.991127
ENSG00000001626	CFTR	0	NA	NA	NA	NA	NA	NA	NA	NA
ENSG00000001629	ANKIB1	58.1789	0.0395869	0.979658	-0.454496	0.768186	0.558643	1	-0.296589	0.96916
ENSG00000001630	CYP51A1	1.70912	0.137621	NA	0.209234	NA	0.139928	1	0.187383	NA
ENSG00000001631	KRIT1	9.27337	-0.0239889	0.989073	0.0222787	0.994754	-0.369434	1	0.0550106	0.999338
ENSG00000002016	RAD52	6.64782	0.342346	NA	0.110391	0.979147	0.26981	1	0.453183	0.844974
ENSG00000002079	MYH16	0.552749	0.0899346	NA	0.100539	NA	0.100995	NA	0.100953	NA
ENSG00000002330	BAD	72.3738	0.201342	0.782509	0.308375	0.823168	-0.0341015	1	0.587378	0.318865
ENSG00000002549	LAP3	34.3787	0.133305	0.911568	-0.204016	0.950911	0.16265	1	0.237531	0.979865
ENSG00000002586	CD99	1117.34	0.213151	0.637789	0.823812	0.000158747	-0.100756	1	0.0447573	0.999338
ENSG00000002587	HS3ST1	0.691051	-0.142395	NA	0	NA	-0.0484315	NA	-0.172155	NA
ENSG00000002726	AOC1	0.0483616	0.0176334	NA	0.00978658	NA	0.0124409	NA	0.0117469	NA
ENSG00000002745	WNT16	2.19143	0.0276848	NA	0.15543	NA	-0.179027	1	0.0850732	0.999338
ENSG00000002746	HECW1	0.48231	0.105102	NA	0.101046	NA	0.102154	NA	0.090051	NA
ENSG00000002822	MAD1L1	108.053	-0.500599	0.469624	-0.80196	0.222584	-0.549598	1	-0.780507	0.247661
ENSG00000002834	LASP1	80.7157	0.745891	0.0914505	0.211766	0.945825	0.273117	1	0.229603	0.976063
ENSG00000002919	SNX11	51.1417	0.65629	0.1379	0.240505	0.917327	0.42112	1	0.699024	0.212143
ENSG00000002933	TMEM176A	0.64995	0.101409	NA	0.0987294	NA	0.098689	NA	0.0761857	NA
ENSG00000003056	M6PR	62.1601	0.440593	0.469389	-0.205659	0.94698	-0.143599	1	-0.0733179	0.999338
ENSG00000003096	KLHL13	55.7745	-0.0334169	0.980614	-0.134621	0.966326	-0.0698919	1	-0.304136	0.945628
ENSG00000003137	CYP26B1	2.85037	-0.113279	NA	0.111016	NA	0.0724981	1	0.18828	0.99258
ENSG00000003147	ICA1	64.5617	-0.0609031	0.969742	-0.904087	0.16611	-0.100926	1	-0.398884	0.90647
ENSG00000003249	DBNDD1	34.8007	-0.587926	0.377741	0.270974	0.935916	0.014496	1	-0.00760924	1
ENSG00000003393	ALS2	43.1892	0.594396	0.408137	0.51213	0.729421	0.508782	1	0.428158	0.890746
ENSG00000003400	CASP10	9.89275	0.380849	0.663378	0.148217	0.96647	0.121633	1	0.252001	0.980841
ENSG00000003402	CFLAR	56.7936	0.0473012	0.973305	0.0204427	0.994527	0.45297	1	0.344467	0.916596
ENSG00000003436	TFPI	60.2899	0.349321	0.678988	0.250504	0.938566	0.457749	1	0.26146	0.975142
ENSG00000003509	NDUFAF7	54.6038	0.106349	0.933385	-0.129246	0.96813	-0.0095824	1	0.34278	0.920765
ENSG00000003756	RBM5	87.4275	0.210492	0.811066	-0.195184	0.949766	-0.101868	1	0.433546	0.781203
ENSG00000003987	MTMR7	9.11381	-0.0967921	0.943117	0.466312	0.716156	-0.15347	1	-0.079657	0.999338
ENSG00000003989	SLC7A2	17.0169	0.198835	0.874446	0.649923	0.517171	0.150972	1	0.537291	0.776198
ENSG00000004059	ARF5	294.233	-0.169609	0.733164	-0.228115	0.808476	-0.0367161	1	-0.579016	0.0332769
ENSG00000004139	SARM1	2.10322	-0.0198877	NA	-0.0556983	NA	0.0243312	1	0.125141	0.999338
ENSG00000004142	POLDIP2	395.143	-0.265899	0.686067	0.0024679	0.998917	-0.127671	1	0.0789804	0.999338
ENSG00000004399	PLXND1	8.49749	0.340709	0.714681	0.686055	0.428039	0.334442	1	0.14201	0.999338
ENSG00000004455	AK2	172.673	0.26719	0.445869	0.159129	0.903354	0.100183	1	0.238111	0.820901
ENSG00000004468	CD38	0	NA	NA	NA	NA	NA	NA	NA	NA
ENSG00000004478	FKBP4	125.578	-0.351654	0.594849	-0.0583827	0.985832	-0.125257	1	-0.105248	0.999338
ENSG00000004487	KDM1A	362.426	-0.89819	0.00705081	-0.5049	0.459962	-0.359692	1	-0.267781	0.937263
ENSG00000004534	RBM6	208.153	-0.489182	0.318668	-0.510582	0.460545	-0.632271	0.524435	-0.126868	0.999338
ENSG00000004660	CAMKK1	20.1868	-0.282814	0.785589	1.08858	0.0566286	0.10724	1	0.161351	0.999338
ENSG00000004700	RECQL	147.496	0.271699	0.733141	-0.783501	0.12637	-0.4087	1	-0.62417	0.371582
ENSG00000004766	VPS50	102.059	0.433252	0.617865	0.124132	0.974145	-0.150921	1	-0.343527	0.951097
ENSG00000004776	HSPB6	0.0263714	0	NA	0	NA	0	NA	0	NA
ENSG00000004777	ARHGAP33	7.2989	-0.182388	0.880487	-0.44806	0.779793	-0.242318	1	-0.255597	0.979456
ENSG00000004779	NDUFAB1	1160.3	0.367599	0.245886	0.724879	0.00229645	0.139276	1	0.164048	0.962754
ENSG00000004799	PDK4	6.2711	-0.119878	NA	0.100249	0.980157	0.124352	1	0.181607	0.999338
ENSG00000004809	SLC22A16	0	NA	NA	NA	NA	NA	NA	NA	NA
ENSG00000004838	ZMYND10	0	NA	NA	NA	NA	NA	NA	NA	NA
ENSG00000004846	ABCB5	0.0263714	0	NA	0	NA	0	NA	0	NA
ENSG00000004848	ARX	1.57713	-0.075059	NA	0.118642	NA	0.0641363	1	-0.0722884	NA
ENSG00000004864	SLC25A13	107.234	-0.272117	0.772449	-0.181419	0.957424	0.271813	1	-0.249127	0.979007
ENSG00000004866	ST7	133.348	-0.172743	0.832053	-0.072812	0.982945	-0.122369	1	-0.213869	0.974828
ENSG00000004897	CDC27	103.088	0.0389816	0.97605	-0.0180447	0.994754	-0.232008	1	-0.226302	0.975142
ENSG00000004939	SLC4A1	0.10577	0.0315068	NA	0.02366	NA	0.0263143	NA	0.0256203	NA
ENSG00000004948	CALCR	0.383696	0.0312969	NA	0.02366	NA	0.0263143	NA	-0.0298733	NA
ENSG00000004961	HCCS	127.189	0.178149	0.863256	0.0817738	0.983614	0.225706	1	0.277053	0.962754
ENSG00000004975	DVL2	37.6442	-0.336791	0.646944	0.144667	0.964325	0.270797	1	0.00378579	1
ENSG00000005001	PRSS22	0	NA	NA	NA	NA	NA	NA	NA	NA
ENSG00000005007	UPF1	39.3971	-0.462142	0.501405	0.0430005	0.990723	0.105179	1	0.330762	0.937263
ENSG00000005020	SKAP2	336.348	0.0027796	0.997943	-0.56694	0.0907916	-0.15508	1	-0.0384913	0.999338
ENSG00000005022	SLC25A5	623.399	0.196996	0.300045	-0.0193919	0.986574	0.0131945	1	-0.0843834	0.974828
ENSG00000005059	MCUB	234.332	-0.344802	0.476703	0.120359	0.960186	-0.26061	1	-0.253398	0.916596
ENSG00000005073	HOXA11	23.6098	-0.283066	0.753439	-0.108791	0.97735	-0.209987	1	0.422312	0.859856
ENSG00000005075	POLR2J	819.453	-0.112309	0.865846	0.0658242	0.975918	0.128948	1	-0.268944	0.820901
ENSG00000005100	DHX33	33.863	-0.917326	0.0331779	-0.339094	0.85979	-0.163631	1	-0.33022	0.933824
ENSG00000005102	MEOX1	1.87758	0.155382	NA	-0.167353	NA	-0.143774	1	-0.252471	0.95061
ENSG00000005108	THSD7A	0.545972	0	NA	0	NA	-0.0992014	NA	0	NA
ENSG00000005156	LIG3	108.709	-0.0849946	0.914654	0.345966	0.647096	0.128848	1	-0.18111	0.96916
ENSG00000005175	RPAP3	277.764	0.0597305	0.963279	-0.5006	0.531731	0.0172801	1	-0.342777	0.878153
ENSG00000005187	ACSM3	4.09297	0.032089	NA	-0.0146722	NA	-0.0899358	1	-0.0994521	0.999338
ENSG00000005189	REXO5	48.8894	0.177723	0.893434	0.0449689	0.992031	-0.0183041	1	-0.405525	0.912181
ENSG00000005194	CIAPIN1	45.8396	0.342215	0.575701	-0.020322	0.99327	0.0809059	1	0.444524	0.680392
ENSG00000005206	SPPL2B	23.9212	0.0226704	0.989842	-0.54059	0.698349	-0.40356	1	-0.652308	0.586348
ENSG00000005238	FAM214B	2.75832	0.237983	NA	0.0739048	NA	0.327222	1	0.334807	0.869718
ENSG00000005243	COPZ2	0.889488	0.0901283	NA	0.120312	NA	0.121235	NA	0.0363782	NA
ENSG00000005249	PRKAR2B	40.7762	-0.666681	0.281805	-0.103318	0.981841	-0.46221	1	-0.116044	0.999338
ENSG00000005302	MSL3	49.6631	0.0144647	0.991957	0.360311	0.823662	-0.0552206	1	0.150332	0.999338
ENSG00000005339	CREBBP	46.8936	0.521715	0.375502	0.413357	0.765175	0.10245	1	0.426617	0.814564
ENSG00000005379	TSPOAP1	1.25273	0	NA	-0.0796594	NA	-0.0549958	1	-0.0333245	NA
ENSG00000005381	MPO	0	NA	NA	NA	NA	NA	NA	NA	NA
ENSG00000005421	PON1	0	NA	NA	NA	NA	NA	NA	NA	NA
ENSG00000005436	GCFC2	160.091	-0.162642	0.863256	0.508864	0.519968	0.534255	0.89537	0.125052	0.999338
ENSG00000005448	WDR54	66.7788	0.31535	0.602715	0.0126054	0.995179	-0.117227	1	-0.116649	0.999338
ENSG00000005469	CROT	57.2606	-0.143736	0.903065	0.202248	0.951592	0.0352362	1	0.125818	0.999338
ENSG00000005471	ABCB4	4.45409	-0.228443	NA	-0.267281	NA	0.0965578	1	0.032721	1
ENSG00000005483	KMT2E	107.116	-0.257944	0.739147	-0.539345	0.471565	-0.449884	1	-0.79442	0.0921246
ENSG00000005486	RHBDD2	132.55	0.0320994	0.977791	0.300211	0.827196	0.169448	1	0.137235	0.999338
ENSG00000005513	SOX8	0.611191	0.0585445	NA	0.0844547	NA	-0.0491826	NA	-0.0852866	NA
ENSG00000005700	IBTK	134.724	0.115881	0.924637	-0.490928	0.658903	-0.159109	1	0.0830162	0.999338
ENSG00000005801	ZNF195	48.6103	0.0648238	0.96269	0.234146	0.93814	0.102448	1	0.175563	0.999338
ENSG00000005810	MYCBP2	34.3767	-0.385156	0.667738	-0.142893	0.96813	-0.198987	1	-0.0484022	0.999508
ENSG00000005812	FBXL3	23.5347	-0.00953788	0.994574	0.0177084	0.994754	0.121647	1	0.30706	0.950798
ENSG00000005844	ITGAL	0	NA	NA	NA	NA	NA	NA	NA	NA
ENSG00000005882	PDK2	91.5269	0.00450537	0.997943	0.303606	0.869878	-0.0724704	1	-0.231547	0.975142
ENSG00000005884	ITGA3	5.96124	-0.435423	NA	-0.270413	0.907859	-0.207389	1	-0.542772	0.595827
ENSG00000005889	ZFX	47.8474	0.11865	0.914654	-0.168241	0.95569	0.032848	1	-0.510119	0.60637
ENSG00000005893	LAMP2	172.23	0.0068703	0.995469	-0.248731	0.879943	-0.187581	1	-0.714295	0.0782564
ENSG00000005961	ITGA2B	7.69508	-0.482003	0.557074	-0.354852	0.880094	-0.671813	0.903973	-0.00409228	1
ENSG00000005981	ASB4	0	NA	NA	NA	NA	NA	NA	NA	NA
ENSG00000006007	GDE1	140.113	0.420854	0.488023	-0.104151	0.972276	0.146834	1	-0.0722271	0.999338
ENSG00000006015	REX1BD	133.247	-0.471614	0.106952	-0.0172645	0.992453	-0.144738	1	0.00344579	1
ENSG00000006016	CRLF1	6.18593	0.0691214	NA	0.438629	0.793616	0.0241001	1	0.0613065	0.999338
ENSG00000006025	OSBPL7	6.77792	0.195664	NA	0.356687	0.849626	-0.0514124	1	-0.145721	0.999338
ENSG00000006042	TMEM98	286.136	-0.127194	0.759099	-0.228513	0.691689	-0.045931	1	-0.205182	0.825482
ENSG00000006047	YBX2	2.64875	0.329319	NA	0.220269	NA	-0.394816	1	-0.0772932	0.999338
ENSG00000006059	KRT33A	0	NA	NA	NA	NA	NA	NA	NA	NA
ENSG00000006062	MAP3K14	3.14217	-0.0226155	NA	0.148759	NA	-0.104953	1	0.097719	0.999338
ENSG00000006071	ABCC8	0.604724	0	NA	-0.0734411	NA	-0.0607982	NA	0	NA
ENSG00000006116	CACNG3	0	NA	NA	NA	NA	NA	NA	NA	NA
ENSG00000006118	TMEM132A	11.4038	0.0907488	0.95509	0.630569	0.562021	0.314868	1	0.763185	0.396323
ENSG00000006125	AP2B1	46.2639	0.300696	0.671531	0.0329712	0.992226	-0.0567172	1	0.414065	0.78432
ENSG00000006128	TAC1	5.67132	0.0675699	NA	0.139103	0.957424	0.0515173	1	-0.495939	0.508555
ENSG00000006194	ZNF263	17.4924	0.167017	0.8938	0.187596	0.958082	0.071373	1	0.393691	0.90647
ENSG00000006210	CX3CL1	0.593279	0	NA	0	NA	-0.093384	NA	-0.048861	NA
ENSG00000006282	SPATA20	29.1442	-0.425937	0.581935	-0.435554	0.778755	-0.437742	1	-0.504686	0.763541
ENSG00000006283	CACNA1G	3.1334	0.0535177	NA	-0.305633	NA	0.0282398	1	0.122812	0.999338
ENSG00000006327	TNFRSF12A	26.5782	1.1701	0.00114513	0.903167	0.0606787	0.321912	1	-0.0336381	1
ENSG00000006377	DLX6	12.5232	-0.297487	0.768905	-0.297819	0.922264	-0.585193	1	-0.320883	0.965181
ENSG00000006432	MAP3K9	4.88419	0.0434746	NA	-0.572479	0.534291	-0.446934	1	-0.336114	0.929188
ENSG00000006451	RALA	125.375	0.270558	0.683746	0.449378	0.563717	0.218427	1	0.177874	0.991535
ENSG00000006453	BAIAP2L1	114.918	-0.00614357	0.997943	0.44981	0.743705	0.127049	1	-0.195842	0.999338
ENSG00000006459	KDM7A	20.5501	-0.307312	0.746569	-0.482579	0.736084	-0.609875	0.967213	0.0122182	1
ENSG00000006468	ETV1	18.5663	-0.0362312	0.980614	-0.433	0.788997	-0.198554	1	-0.0195672	1
ENSG00000006530	AGK	31.1032	0.349187	0.676666	0.278388	0.918473	0.269685	1	0.716457	0.352458
ENSG00000006534	ALDH3B1	1.19362	0.0105956	NA	-0.00985072	NA	0.0433347	1	-0.161011	NA
ENSG00000006555	TTC22	0	NA	NA	NA	NA	NA	NA	NA	NA
ENSG00000006576	PHTF2	124.441	0.365826	0.55941	0.0511004	0.986574	-0.230279	1	0.397746	0.792296
ENSG00000006606	CCL26	0.968488	0.0641293	NA	0.0441241	NA	0.0253997	NA	0.00772988	NA
ENSG00000006607	FARP2	41.3754	0.600259	0.375502	0.391418	0.841472	0.415423	1	0.470915	0.833928
ENSG00000006611	USH1C	3.62988	-0.124332	NA	0.0168617	NA	-0.500141	0.726404	-0.413759	0.616825
ENSG00000006625	GGCT	217.913	-0.0635309	0.925552	-0.362421	0.387726	0.135154	1	0.0546274	0.999338
ENSG00000006634	DBF4	27.2143	0.27857	0.790072	-0.1398	0.970778	-0.058036	1	-0.538997	0.776198
ENSG00000006638	TBXA2R	2.40107	0.334039	NA	0.444372	NA	-0.0700391	1	0.284032	0.937263
ENSG00000006652	IFRD1	250.582	0.130288	0.889898	0.776848	0.0594166	0.22189	1	0.188109	0.984018
ENSG00000006659	LGALS14	0.145085	0.0453802	NA	0.0375334	NA	0.0401877	NA	0.0394937	NA
ENSG00000006695	COX10	42.304	-0.182415	0.867566	-0.175176	0.958082	-0.256013	1	-0.530158	0.681999
ENSG00000006704	GTF2IRD1	47.8547	-0.390688	0.647225	-0.333399	0.88516	0.147846	1	-0.275638	0.974828
ENSG00000006712	PAF1	97.5854	0.00289613	0.997943	-0.0522028	0.983614	-0.0728827	1	-0.00193187	1
ENSG00000006715	VPS41	190.607	0.0274351	0.980614	-0.44837	0.546238	-0.126564	1	0.332137	0.84918
ENSG00000006740	ARHGAP44	31.4644	-0.204804	0.869488	0.0268428	0.993577	0.276001	1	-0.308785	0.96916
ENSG00000006744	ELAC2	395.086	-0.612437	0.00614451	0.0840221	0.964325	0.190758	1	0.0185275	1
ENSG00000006747	SCIN	90.5599	0.472534	0.533438	-0.183415	0.958082	-0.482957	1	-0.680283	0.465174
ENSG00000006756	ARSD	0	NA	NA	NA	NA	NA	NA	NA	NA
ENSG00000006757	PNPLA4	35.2136	0.426074	0.638071	0.226449	0.951592	-1.71228	8.74391e-05	-1.81211	7.31757e-06
ENSG00000006788	MYH13	0	NA	NA	NA	NA	NA	NA	NA	NA
ENSG00000006831	ADIPOR2	55.6377	0.466505	0.572359	0.396042	0.845335	0.259566	1	0.170814	0.999338
ENSG00000006837	CDKL3	4.04263	-0.116437	NA	0.428597	NA	-0.202042	1	0.165204	0.999338
ENSG00000007001	UPP2	0.0900083	0	NA	0	NA	0	NA	0	NA
ENSG00000007038	PRSS21	0	NA	NA	NA	NA	NA	NA	NA	NA
ENSG00000007047	MARK4	36.9917	-1.06104	0.0313234	0.330741	0.903354	0.154754	1	0.63976	0.60637
ENSG00000007062	PROM1	4.60136	0.221221	NA	0.164865	NA	0.205671	1	-0.180417	0.96916
ENSG00000007080	CCDC124	253.206	0.0738459	0.946924	0.115105	0.966145	0.135961	1	0.199026	0.977044
ENSG00000007129	CEACAM21	0.193446	0.0592536	NA	0.0514068	NA	0.0540611	NA	0.0533671	NA
ENSG00000007168	PAFAH1B1	72.0073	-0.296738	0.583315	-0.0896301	0.971396	-0.314787	1	0.237526	0.945628
ENSG00000007171	NOS2	6.13745	-0.092956	NA	0.241785	0.852521	0.231611	1	0.175039	0.976063
ENSG00000007174	DNAH9	0.135404	0.0176334	NA	0.00978658	NA	-0.00143249	NA	0.0117469	NA
ENSG00000007202	KIAA0100	62.4149	0.516672	0.340286	0.259331	0.906972	0.607356	0.735851	0.699654	0.231661
ENSG00000007216	SLC13A2	0	NA	NA	NA	NA	NA	NA	NA	NA
ENSG00000007237	GAS7	1.6017	-0.148335	NA	0.0454544	NA	-0.0799216	1	-0.04206	NA
ENSG00000007255	TRAPPC6A	79.0547	-0.146884	0.893554	-0.270504	0.909882	0.0847719	1	-0.425756	0.807378
ENSG00000007264	MATK	0.970344	-0.134711	NA	0.0858363	NA	-0.0708133	NA	0.0907436	NA
ENSG00000007306	CEACAM7	0	NA	NA	NA	NA	NA	NA	NA	NA
ENSG00000007312	CD79B	0.108438	-0.0101135	NA	0	NA	0	NA	0	NA
ENSG00000007314	SCN4A	0	NA	NA	NA	NA	NA	NA	NA	NA
ENSG00000007341	ST7L	85.286	0.212189	0.786201	0.289531	0.862803	0.470431	0.990327	0.27723	0.940343
ENSG00000007350	TKTL1	1.73371	0.00563442	NA	0.0466155	NA	-0.174781	1	-0.119833	NA
ENSG00000007372	PAX6	53.2193	0.61505	0.249757	-0.354437	0.825776	-0.35975	1	-0.50177	0.669251
ENSG00000007376	RPUSD1	17.6307	-0.0836693	0.95711	0.648668	0.507924	0.175297	1	0.269271	0.977029
ENSG00000007384	RHBDF1	4.02884	0.166979	NA	0.112353	NA	0.0428381	1	0.310276	0.962754
ENSG00000007392	LUC7L	102.765	0.676254	0.158786	0.336283	0.837116	-0.312504	1	0.0853968	0.999338
ENSG00000007402	CACNA2D2	2.70818	0.107349	NA	-0.208885	NA	-0.351511	1	0.107038	0.999338
ENSG00000007516	BAIAP3	0.863355	0.0192277	NA	0.032011	NA	-0.0504364	NA	-0.0232549	NA
ENSG00000007520	TSR3	19.0701	0.234284	0.82364	0.0170053	0.995179	-0.0999834	1	0.0277871	1
ENSG00000007541	PIGQ	15.6699	0.343489	0.714681	0.587856	0.609489	0.182124	1	0.456373	0.84918
ENSG00000007545	CRAMP1	7.40809	0.323725	0.743158	0.0412291	0.992415	0.215642	1	0.118831	0.999338
ENSG00000007866	TEAD3	19.7659	0.00335226	0.997943	0.551905	0.67932	0.350144	1	0.0450353	1
ENSG00000007908	SELE	0.0483616	0.0176334	NA	0.00978658	NA	0.0124409	NA	0.0117469	NA
ENSG00000007923	DNAJC11	103.88	0.453667	0.502351	0.299201	0.891157	0.530282	1	-0.0349462	1
ENSG00000007933	FMO3	0	NA	NA	NA	NA	NA	NA	NA	NA
ENSG00000007944	MYLIP	31.5844	-0.265765	0.799995	-0.178255	0.962195	-0.471233	1	0.142177	0.999338
ENSG00000007952	NOX1	2.09981	0.0960999	NA	0.169332	NA	-0.133639	1	0.341194	0.88253
ENSG00000007968	E2F2	17.8222	-0.497944	0.526262	-0.703	0.441572	-0.315716	1	-0.223214	0.999338
ENSG00000008018	PSMB1	2857.57	0.258784	0.436908	0.033544	0.985964	0.205707	1	0.165378	0.938735
ENSG00000008056	SYN1	0.0779959	0	NA	0	NA	-0.0153059	NA	0	NA
ENSG00000008083	JARID2	54.0919	0.223006	0.836505	-0.249219	0.94556	-0.0623014	1	0.269999	0.975491
ENSG00000008086	CDKL5	8.10768	0.757854	0.201175	0.542372	0.666622	-0.0123635	1	0.102389	0.999338
ENSG00000008118	CAMK1G	1.3105	-0.0573119	NA	-0.00341309	NA	-0.0893665	1	-0.0446757	NA
ENSG00000008128	CDK11A	8.22481	-0.0584472	0.971275	-0.153872	0.967957	-0.143683	1	0.217793	0.999338
ENSG00000008130	NADK	101.154	-0.263903	0.7391	-0.18435	0.951592	-0.115382	1	-0.155315	0.999338
ENSG00000008196	TFAP2B	0	NA	NA	NA	NA	NA	NA	NA	NA
ENSG00000008197	TFAP2D	0	NA	NA	NA	NA	NA	NA	NA	NA
ENSG00000008226	DLEC1	0.0644533	-0.0101135	NA	0	NA	0	NA	0	NA
ENSG00000008256	CYTH3	24.6589	-0.784871	0.155669	-0.4479	0.787199	-0.0382703	1	-0.203434	0.999338
ENSG00000008277	ADAM22	14.3794	-0.520908	0.488919	-0.228352	0.949766	-0.0669088	1	-0.679048	0.503014
ENSG00000008282	SYPL1	204.203	0.187381	0.755148	-0.0699811	0.97836	0.0200068	1	-0.556517	0.163388
ENSG00000008283	CYB561	10.7821	-0.15784	0.908335	-0.400278	0.847191	-0.090123	1	-0.589106	0.705374
ENSG00000008294	SPAG9	144.673	-0.235944	0.825914	0.181032	0.958893	0.0297757	1	0.119201	0.999338
ENSG00000008300	CELSR3	0.252864	0.00444771	NA	0.0115767	NA	-0.00169452	NA	0.0138956	NA
ENSG00000008311	AASS	61.7986	1.04138	0.0257599	0.335425	0.885696	0.601254	0.976362	0.330653	0.951851
ENSG00000008323	PLEKHG6	1.88022	0	NA	-0.460411	NA	-0.0601621	1	0	1
ENSG00000008324	SS18L2	86.5887	-0.0162807	0.989073	0.129481	0.959142	0.0974444	1	0.0678725	0.999338
ENSG00000008382	MPND	24.3167	-0.128153	0.929334	-0.356902	0.879943	0.0948656	1	0.125946	0.999338
ENSG00000008394	MGST1	92.7713	-3.05349	6.22888e-22	-3.06367	6.26002e-22	0.520859	1	-2.43487	2.56264e-13
ENSG00000008405	CRY1	55.8725	0.156549	0.83	0.276686	0.831937	0.380049	1	-0.217692	0.95986
ENSG00000008438	PGLYRP1	0	NA	NA	NA	NA	NA	NA	NA	NA
ENSG00000008441	NFIX	15.853	0.360009	0.705977	-0.0823514	0.98464	0.262059	1	0.0611045	0.999338
ENSG00000008513	ST3GAL1	5.0506	-0.0619571	NA	-0.323908	0.891845	-0.0199131	1	-0.131072	0.999338
ENSG00000008516	MMP25	0.467633	0.00928087	NA	-0.0371138	NA	-0.00428906	NA	-0.0609052	NA
ENSG00000008517	IL32	28.0782	0.52227	0.501697	-0.10418	0.982495	-0.133312	1	-0.790286	0.337954
ENSG00000008710	PKD1	2.55196	0.285504	NA	0.0880895	NA	-0.073028	1	-0.131508	0.999338
ENSG00000008735	MAPK8IP2	16.9173	-0.108237	0.938251	-0.0642628	0.986574	-0.267776	1	-0.573934	0.645604
ENSG00000008838	MED24	105.368	0.252489	0.766485	0.496584	0.623493	0.0841599	1	0.252995	0.971642
ENSG00000008853	RHOBTB2	4.78116	0.0190155	NA	0.185448	NA	0.0878138	1	0.148164	0.999338
ENSG00000008869	HEATR5B	42.8858	0.287893	0.782166	0.175239	0.964325	0.291608	1	0.036906	1
ENSG00000008952	SEC62	440.385	-0.110157	0.893554	-0.227922	0.87926	-0.15127	1	-0.183285	0.974828
ENSG00000008988	RPS20	1499.36	-0.602014	0.000172892	0.017787	0.991922	0.186375	1	-0.0922533	0.996558
ENSG00000009307	CSDE1	852.077	0.176238	0.776978	-0.0123147	0.994754	-0.0369448	1	0.0688296	0.999338
ENSG00000009335	UBE3C	118.406	0.132579	0.911626	0.373959	0.824434	0.403962	1	0.852747	0.132644
ENSG00000009413	REV3L	39.8316	0.28158	0.78744	0.290539	0.930114	0.24133	1	0.144797	0.999338
ENSG00000009694	TENM1	0.200512	-0.0101135	NA	0.00978658	NA	0.0124409	NA	-0.00212653	NA
ENSG00000009709	PAX7	4.33353	0.115851	NA	-0.112021	NA	-0.261136	1	-0.36429	0.877068
ENSG00000009724	MASP2	0.273956	0.0176334	NA	0.00978658	NA	0.0124409	NA	-0.0298733	NA
ENSG00000009765	IYD	0.119462	0	NA	-0.0179602	NA	-0.0153059	NA	0	NA
ENSG00000009780	FAM76A	28.7489	-0.591696	0.411442	-0.666745	0.501726	-0.0754259	1	-0.679511	0.541946
ENSG00000009790	TRAF3IP3	0.0527428	0	NA	0	NA	0	NA	0	NA
ENSG00000009830	POMT2	40.2904	-0.187362	0.885974	-0.287336	0.935083	0.637354	0.976262	0.23501	0.999338
ENSG00000009844	VTA1	390.353	0.367208	0.379626	0.297422	0.748865	0.211179	1	-0.0743818	0.999338
ENSG00000009950	MLXIPL	8.41979	-0.279904	0.782325	-0.360397	0.874203	-0.404352	1	-0.661237	0.547327
ENSG00000009954	BAZ1B	158.59	-0.358447	0.482364	-0.0341912	0.988432	-0.0237785	1	-0.0777111	0.999338
ENSG00000010017	RANBP9	72.4218	-0.0682602	0.962338	-0.12473	0.96813	-0.0824191	1	-0.288502	0.960623
ENSG00000010030	ETV7	6.30966	0.0931387	NA	-0.0672642	0.985082	0.228043	1	-0.488946	0.754733
ENSG00000010072	SPRTN	59.2861	0.266612	0.713189	0.161268	0.955166	0.283716	1	0.0193115	1
ENSG00000010165	METTL13	88.4555	-0.14789	0.907681	-0.583964	0.563717	-0.468388	1	-0.509233	0.771895
ENSG00000010219	DYRK4	106.605	0.0521487	0.959034	-0.192903	0.917746	-0.339699	1	0.0907201	0.999338
ENSG00000010244	ZNF207	176.636	0.268437	0.449494	0.168358	0.891157	0.190787	1	0.0288579	0.999338
ENSG00000010256	UQCRC1	541.559	0.159691	0.526447	-0.0598226	0.960237	0.0456661	1	-0.279878	0.21372
ENSG00000010270	STARD3NL	396.876	-0.563603	0.0313234	-0.484039	0.18988	-0.157195	1	-0.284296	0.783794
ENSG00000010278	CD9	427.435	0.587566	0.00386442	-0.0712282	0.966145	-0.308511	0.883554	-0.0440853	0.999338
ENSG00000010282	HHATL	0	NA	NA	NA	NA	NA	NA	NA	NA
ENSG00000010292	NCAPD2	149.39	-0.0501991	0.954797	-0.348254	0.563353	-0.130059	1	-0.0209413	1
ENSG00000010295	IFFO1	20.91	0.219929	0.84543	0.726479	0.391514	0.877797	0.434319	0.896047	0.182668
ENSG00000010310	GIPR	1.27756	-0.0364777	NA	0.147971	NA	0.0249355	1	0.0911715	NA
ENSG00000010318	PHF7	6.95766	0.176367	NA	-0.264694	0.94519	0.117757	1	0.148383	0.999338
ENSG00000010319	SEMA3G	0.498838	0.0149528	NA	0.0491169	NA	-0.0709938	NA	0.0215716	NA
ENSG00000010322	NISCH	37.2072	-0.374244	0.667738	0.215682	0.951592	-0.156962	1	-0.334771	0.95061
ENSG00000010327	STAB1	0.131245	0	NA	0	NA	0	NA	-0.0298733	NA
ENSG00000010361	FUZ	18.7399	0.0140929	0.99259	-0.149903	0.96813	-0.134121	1	-0.117249	0.999338
ENSG00000010379	SLC6A13	0.0263714	0	NA	0	NA	0	NA	0	NA
ENSG00000010404	IDS	41.3267	0.287811	0.721689	0.128444	0.96813	0.0187879	1	0.246706	0.974828
ENSG00000010438	PRSS3	8.83463	0.0960024	0.951652	1.094	0.0518394	0.423259	1	0.149405	0.999338
ENSG00000010539	ZNF200	28.9572	0.566029	0.415086	-0.0913696	0.983614	-0.16197	1	-0.118539	0.999338
ENSG00000010610	CD4	0.289339	-0.0243245	NA	-0.0179602	NA	0	NA	-0.0437468	NA
ENSG00000010626	LRRC23	12.8431	-0.0243317	0.989073	-0.0903178	0.983655	-0.209606	1	-0.313136	0.96916
ENSG00000010671	BTK	0.898079	-0.0632484	NA	-0.0489035	NA	-0.0485207	NA	0	NA
ENSG00000010704	HFE	0.510368	0.0301418	NA	0.0117482	NA	0.0160234	NA	-0.0434419	NA
ENSG00000010803	SCMH1	96.9094	-0.0482273	0.9769	-0.0877014	0.983806	-0.526936	1	-0.382207	0.921934
ENSG00000010810	FYN	125.947	-0.558267	0.314201	-0.194639	0.950635	0.0878428	1	0.725943	0.24752
ENSG00000010818	HIVEP2	10.9364	0.670947	0.295887	0.320047	0.903354	0.0772782	1	0.736758	0.390097
ENSG00000010932	FMO1	23.1276	0.28195	0.781294	-0.415139	0.825776	-0.238128	1	-0.302154	0.96916
ENSG00000011007	ELOA	100.195	0.456704	0.372642	0.201504	0.939129	0.463641	0.981376	0.388637	0.785006
ENSG00000011009	LYPLA2	80.6731	-0.00084555	0.999308	-0.215723	0.900644	-0.222325	1	-0.107095	0.999338
ENSG00000011021	CLCN6	12.9919	-0.0909212	0.954797	0.0927032	0.983655	0.0890198	1	0.205599	0.999338
ENSG00000011028	MRC2	14.6046	0.0511216	0.975864	0.0208837	0.994754	-0.206723	1	0.00781775	1
ENSG00000011052	NME1-NME2	0	NA	NA	NA	NA	NA	NA	NA	NA
ENSG00000011083	SLC6A7	0	NA	NA	NA	NA	NA	NA	NA	NA
ENSG00000011105	TSPAN9	27.5473	-0.195751	0.878194	0.0784335	0.985082	-0.0982033	1	0.211965	0.999338
ENSG00000011114	BTBD7	15.9797	0.206182	0.866498	0.0248272	0.993806	0.0577763	1	-0.20478	0.999338
ENSG00000011132	APBA3	13.1816	-0.526806	0.501823	0.385856	0.857724	0.133041	1	0.403809	0.912181
ENSG00000011143	MKS1	85.9666	0.723573	0.0683856	0.2795	0.874203	0.115438	1	0.113382	0.999338
ENSG00000011198	ABHD5	52.4903	-0.0376716	0.977729	-0.423436	0.710143	0.161292	1	-0.258247	0.964994
ENSG00000011201	ANOS1	39.5335	-0.249935	0.804764	0.255754	0.943376	0.509207	1	0.477195	0.814718
ENSG00000011243	AKAP8L	39.6481	-1.01543	0.0238721	-0.086727	0.983655	0.0043436	1	-0.535045	0.722678
ENSG00000011258	MBTD1	42.1015	-0.277271	0.790042	0.268318	0.94519	0.0612324	1	-0.0360429	1
ENSG00000011260	UTP18	46.7951	0.320678	0.650368	0.258123	0.906972	0.24582	1	0.322957	0.905629
ENSG00000011275	RNF216	136.026	0.226642	0.743158	-0.228084	0.906751	0.284505	1	0.0648777	0.999338
ENSG00000011295	TTC19	144.814	-0.36692	0.46967	-0.142148	0.95569	-0.27635	1	-0.307501	0.859856
ENSG00000011304	PTBP1	271.159	-0.39951	0.0822448	0.161628	0.87926	0.138987	1	0.355929	0.33781
ENSG00000011332	DPF1	28.8035	-0.0194549	0.99079	0.0415159	0.992337	0.199034	1	-0.0923646	0.999338
ENSG00000011347	SYT7	1.24498	-0.182226	NA	0.0633161	NA	-0.028943	1	-0.0364778	NA
ENSG00000011376	LARS2	55.4321	-0.257925	0.811969	-0.17592	0.963361	-0.250432	1	-0.355672	0.94202
ENSG00000011405	PIK3C2A	59.9346	-0.305499	0.7653	-0.738442	0.409214	-0.232783	1	0.122994	0.999338
ENSG00000011422	PLAUR	18.8826	0.378693	0.682194	0.24384	0.948829	-0.0278774	1	0.539133	0.76503
ENSG00000011426	ANLN	218.622	0.301932	0.718207	-0.447043	0.726784	-0.0610474	1	-0.0871002	0.999338
ENSG00000011451	WIZ	17.8032	0.117093	0.927705	0.464267	0.742579	0.187575	1	0.762543	0.299595
ENSG00000011454	RABGAP1	74.2783	0.0219997	0.990279	0.138256	0.970778	-0.593977	1	0.0240618	1
ENSG00000011465	DCN	0	NA	NA	NA	NA	NA	NA	NA	NA
ENSG00000011478	QPCTL	12.5572	0.145096	0.911626	-0.0686059	0.986532	0.123256	1	-0.0151134	1
ENSG00000011485	PPP5C	298.121	-0.8161	0.0141777	-0.138082	0.958082	-0.174846	1	-0.406513	0.721855
ENSG00000011523	CEP68	31.4828	0.29065	0.730305	0.286551	0.906776	0.126964	1	0.388053	0.874305
ENSG00000011566	MAP4K3	50.786	-0.473763	0.577753	-0.0630426	0.987694	-0.0866485	1	0.108124	0.999338
ENSG00000011590	ZBTB32	0.3629	-0.0139028	NA	-0.0238918	NA	0.0165496	NA	0.0156264	NA
ENSG00000011600	TYROBP	0	NA	NA	NA	NA	NA	NA	NA	NA
ENSG00000011638	TMEM159	16.3339	0.861937	0.101099	0.276692	0.930375	0.516884	1	0.64757	0.549499
ENSG00000011677	GABRA3	0	NA	NA	NA	NA	NA	NA	NA	NA
ENSG00000012048	BRCA1	106.222	0.492893	0.521584	0.0624676	0.987145	0.0296578	1	-0.0589276	0.999338
ENSG00000012061	ERCC1	204.577	-0.204516	0.808542	-0.135778	0.964107	-0.241878	1	-0.670602	0.234781
ENSG00000012124	CD22	0.352357	0.0867906	NA	0.0791536	NA	0.0818079	NA	0.0811139	NA
ENSG00000012171	SEMA3B	0.813381	-0.0395072	NA	0.0877368	NA	0.0896022	NA	-0.064899	NA
ENSG00000012174	MBTPS2	75.6399	0.339025	0.641718	-0.467149	0.627819	-0.0645458	1	-0.0295898	1
ENSG00000012211	PRICKLE3	3.14669	-0.029378	NA	0.365237	NA	0.219687	1	-0.223761	0.99258
ENSG00000012223	LTF	0	NA	NA	NA	NA	NA	NA	NA	NA
ENSG00000012232	EXTL3	21.0472	-0.35006	0.707287	0.167685	0.964325	-0.142769	1	-0.0973075	0.999338
ENSG00000012504	NR1H4	0.0636369	0	NA	0	NA	0	NA	0	NA
ENSG00000012660	ELOVL5	225.709	0.517284	0.357139	0.140008	0.964325	-0.0907585	1	0.0857574	0.999338
ENSG00000012779	ALOX5	7.71504	-0.662503	0.237597	-0.226273	0.947777	-0.424803	1	-0.750843	0.275786
ENSG00000012817	KDM5D	0.192694	-0.0101135	NA	0.00978658	NA	0.0124409	NA	0.0117469	NA
ENSG00000012822	CALCOCO1	35.5342	0.211551	0.846804	0.22066	0.949766	0.209605	1	0.142272	0.999338
ENSG00000012963	UBR7	62.4882	0.22911	0.792267	-0.276798	0.900382	-0.106921	1	-0.350643	0.892091
ENSG00000012983	MAP4K5	72.5676	-0.499846	0.496252	-0.909358	0.132864	-0.147104	1	-0.653029	0.516441
ENSG00000013016	EHD3	8.04456	-0.503151	0.533063	-0.021414	0.994754	-0.024096	1	0.329192	0.962319
ENSG00000013275	PSMC4	353.685	0.13278	0.803882	-0.117524	0.949766	0.0328515	1	-0.296729	0.674908
ENSG00000013288	MAN2B2	26.469	0.730036	0.249859	0.128141	0.973767	-0.0425851	1	0.140602	0.999338
ENSG00000013293	SLC7A14	0	NA	NA	NA	NA	NA	NA	NA	NA
ENSG00000013297	CLDN11	0.0574082	0.0176334	NA	0.00978658	NA	0.0124409	NA	0.0117469	NA
ENSG00000013306	SLC25A39	312.503	-0.193376	0.73148	0.0951416	0.964599	0.13121	1	0.0643697	0.999338
ENSG00000013364	MVP	6.76883	-0.0209177	NA	-0.163896	0.964325	-1.06069	0.139456	-1.41651	0.00101709
ENSG00000013374	NUB1	114.851	0.0296156	0.980614	0.00222694	0.999237	-0.167711	1	0.53027	0.563867
ENSG00000013375	PGM3	253.904	0.682945	0.0537554	0.490332	0.441572	0.750017	0.139456	0.450457	0.579548
ENSG00000013392	RWDD2A	21.303	0.0811516	0.959644	-0.348891	0.883459	0.032839	1	-0.171733	0.999338
ENSG00000013441	CLK1	79.8481	-0.205318	0.776022	0.281027	0.852677	-0.257631	1	-0.270338	0.927028
ENSG00000013503	POLR3B	60.2903	0.809965	0.173001	0.55626	0.676491	0.443918	1	1.2435	0.0130909
ENSG00000013523	ANGEL1	18.4715	-0.147194	0.914654	-0.201293	0.957424	-0.0410357	1	-0.685008	0.539651
ENSG00000013561	RNF14	47.499	0.347381	0.677352	0.311772	0.891157	-0.088175	1	0.0248813	1
ENSG00000013563	DNASE1L1	5.1106	-0.0373921	NA	-0.0145901	0.996368	-0.012529	1	-0.133558	0.999338
ENSG00000013573	DDX11	115.902	0.0135465	0.992573	0.0482966	0.987756	0.0976411	1	0.136291	0.999338
ENSG00000013583	HEBP1	44.1513	-0.12698	0.927715	-0.0802936	0.984815	0.0242785	1	0.0386551	1
ENSG00000013588	GPRC5A	25.4906	-0.0510793	0.970978	-0.00546698	0.997966	-0.158618	1	-0.64567	0.414171
ENSG00000013619	MAMLD1	3.71877	0.171287	NA	0.0938211	NA	-0.0210445	1	-0.143516	0.999338
ENSG00000013725	CD6	0.240093	0	NA	0	NA	0	NA	-0.0576202	NA
ENSG00000013810	TACC3	121.75	0.138602	0.909909	-0.0200263	0.994754	0.00693567	1	0.571298	0.618825
ENSG00000014123	UFL1	223.64	0.19803	0.796219	0.455422	0.563717	0.215045	1	0.153294	0.999338
ENSG00000014138	POLA2	29.8425	0.288125	0.714681	0.00547081	0.997688	0.168719	1	-0.0302416	1
ENSG00000014164	ZC3H3	23.0857	0.0463055	0.977729	0.765748	0.374762	0.592833	1	0.525786	0.79011
ENSG00000014216	CAPN1	134.783	0.174244	0.856133	-0.224611	0.93549	-0.141455	1	-0.155845	0.999338
ENSG00000014257	ACPP	1.32217	0.0215161	NA	0.0864705	NA	-0.000514053	1	0.0601593	NA
ENSG00000014641	MDH1	699.565	0.220603	0.373445	-0.0384138	0.981841	-0.0444861	1	-0.227907	0.600329
ENSG00000014824	SLC30A9	206.214	-0.593854	0.0518497	-0.726558	0.0185856	-0.593297	0.291232	-0.780638	0.00616962
ENSG00000014914	MTMR11	1.82422	-0.173703	NA	0.170088	NA	-0.153375	1	0.00784767	NA
ENSG00000014919	COX15	24.6115	0.0209068	0.989073	-0.102947	0.979147	-0.137022	1	-0.0300389	1
ENSG00000015133	CCDC88C	130.809	-0.31358	0.516306	-0.209568	0.896952	-0.00989501	1	-0.310643	0.81453
ENSG00000015153	YAF2	54.633	0.358699	0.510302	0.539779	0.384306	0.486188	0.890635	0.34347	0.83334
ENSG00000015171	ZMYND11	76.668	0.122939	0.909909	0.425849	0.71506	0.0938738	1	-0.375837	0.844974
ENSG00000015285	WAS	1.02066	0.0232542	NA	0.100738	NA	0.102434	1	-0.0555474	NA
ENSG00000015413	DPEP1	0.183167	0.0315068	NA	0.0375334	NA	0.0401877	NA	0.0394937	NA
ENSG00000015475	BID	256.277	-0.001899	0.997943	-0.0829395	0.966947	-0.196465	1	-0.153877	0.975142
ENSG00000015479	MATR3	27.8993	0.306563	0.718188	0.400048	0.808476	0.283715	1	0.0150944	1
ENSG00000015520	NPC1L1	3.09828	0.0970715	NA	-0.0781492	NA	0.169458	1	0.103356	0.999338
ENSG00000015532	XYLT2	35.0814	-0.232285	0.776897	-0.258528	0.913045	-0.401171	1	0.113786	0.999338
ENSG00000015568	RGPD5	45.7431	0.311976	0.734793	0.278602	0.923814	0.130298	1	0.0715207	0.999338
ENSG00000015592	STMN4	0.855916	0.0701682	NA	0.0591314	NA	0.0698212	NA	0.0184367	NA
ENSG00000015676	NUDCD3	63.8584	0.395346	0.629632	0.183767	0.957424	-0.109511	1	-0.00834815	1
ENSG00000016082	ISL1	20.2723	0.395175	0.67407	-0.218781	0.952617	-0.00837333	1	-0.208561	0.999338
ENSG00000016391	CHDH	3.79511	-0.353395	NA	-0.00117661	NA	-0.0114251	1	-0.00115331	1
ENSG00000016402	IL20RA	9.12849	0.894035	0.0908486	0.156353	0.965991	0.104303	1	0.386181	0.917688
ENSG00000016490	CLCA1	0	NA	NA	NA	NA	NA	NA	NA	NA
ENSG00000016602	CLCA4	0	NA	NA	NA	NA	NA	NA	NA	NA
ENSG00000016864	GLT8D1	26.3679	-0.703748	0.183715	0.350573	0.863632	-0.179619	1	0.0543059	0.999338
ENSG00000017260	ATP2C1	162.252	-0.4383	0.608718	-0.176323	0.962465	-0.39982	1	-0.426307	0.883195
ENSG00000017427	IGF1	0.687736	0	NA	-0.0412007	NA	0	NA	-0.0405994	NA
ENSG00000017483	SLC38A5	0.179104	-0.0378603	NA	0	NA	0	NA	-0.0159999	NA
ENSG00000017797	RALBP1	132.273	0.254609	0.70017	-0.11775	0.964325	0.000212057	1	0.260803	0.932942
ENSG00000018189	RUFY3	8.63182	0.248737	0.819033	0.170883	0.96358	-0.138349	1	0.195386	0.999338
ENSG00000018236	CNTN1	34.4988	-0.0923211	0.947522	-0.218965	0.949766	-0.359363	1	0.0240881	1
ENSG00000018280	SLC11A1	1.71255	-0.0530971	NA	0.0266514	NA	-0.168063	1	-0.267066	NA
ENSG00000018408	WWTR1	36.056	0.215056	0.836067	0.536377	0.626034	0.422247	1	0.0761788	0.999338
ENSG00000018510	AGPS	148.316	-0.153904	0.844363	0.173808	0.947361	0.172069	1	0.145446	0.999338
ENSG00000018607	ZNF806	0.10577	0.0315068	NA	0.02366	NA	0.0263143	NA	0.0256203	NA
ENSG00000018610	CXorf56	31.2115	0.023345	0.985777	-0.14989	0.962195	-0.2336	1	0.00468459	1
ENSG00000018625	ATP1A2	0	NA	NA	NA	NA	NA	NA	NA	NA
ENSG00000018699	TTC27	119.893	0.0619278	0.969742	0.390481	0.849522	-0.0559938	1	0.093264	0.999338
ENSG00000018869	ZNF582	16.2192	-0.388474	0.679764	0.324839	0.909189	-0.326792	1	-0.153146	0.999338
ENSG00000019102	VSIG2	0.888837	-0.0153041	NA	0	NA	0	NA	-0.229811	NA
ENSG00000019144	PHLDB1	11.7777	0.102254	0.934602	0.0562962	0.986574	0.182147	1	-0.12322	0.999338
ENSG00000019169	MARCO	0	NA	NA	NA	NA	NA	NA	NA	NA
ENSG00000019186	CYP24A1	0.340481	0	NA	0	NA	-0.0430527	NA	-0.0437468	NA
ENSG00000019485	PRDM11	2.03318	0.0110024	NA	-0.146137	NA	-0.0280876	1	-0.0510243	0.999338
ENSG00000019505	SYT13	0.0601398	0	NA	-0.0179602	NA	0	NA	0	NA
ENSG00000019549	SNAI2	3.08895	0.0441026	NA	0.0922481	NA	0.086505	1	-0.221579	0.975625
ENSG00000019582	CD74	2.19746	0.0559075	NA	-0.0325455	NA	-0.0152935	1	-0.148981	0.971642
ENSG00000019991	HGF	0.470822	0	NA	-0.101201	NA	0	NA	0	NA
ENSG00000019995	ZRANB1	9.6008	-0.475209	0.533535	-0.040899	0.99215	-0.00711274	1	0.420801	0.869105
ENSG00000020129	NCDN	22.8187	0.312113	0.739147	-0.0319655	0.992453	0.216833	1	0.33788	0.949573
ENSG00000020181	ADGRA2	1.66978	-0.0242349	NA	0.103366	NA	0.182965	1	0.136359	NA
ENSG00000020219	CCT8L1P	0	NA	NA	NA	NA	NA	NA	NA	NA
ENSG00000020256	ZFP64	31.8292	-0.115666	0.938251	0.965557	0.135707	0.369543	1	0.258701	0.986519
ENSG00000020426	MNAT1	279.848	0.0228255	0.980198	-0.443124	0.316426	0.137573	1	-0.568026	0.0869442
ENSG00000020577	SAMD4A	4.17844	0.133513	NA	-0.0236972	NA	0.322156	1	0.114122	0.999338
ENSG00000020633	RUNX3	31.0343	-0.679876	0.259052	-0.168938	0.96358	-0.133582	1	0.670183	0.516441
ENSG00000020922	MRE11	19.5611	0.617726	0.295887	0.557093	0.582343	-0.143985	1	0.584807	0.597176
ENSG00000021300	PLEKHB1	11.0403	0.249521	0.819033	0.428226	0.808476	0.404676	1	-0.0106457	1
ENSG00000021355	SERPINB1	107.477	0.499851	0.376989	0.0116228	0.996467	0.13383	1	-0.136493	0.999338
ENSG00000021461	CYP3A43	0.0636369	0	NA	0	NA	0	NA	0	NA
ENSG00000021488	SLC7A9	0.521928	0.0380271	NA	0.0398088	NA	0.0263917	NA	0.0551585	NA
ENSG00000021574	SPAST	31.7725	-0.13734	0.921849	0.267398	0.94519	-0.0123645	1	0.183851	0.999338
ENSG00000021645	NRXN3	21.0158	0.259812	0.81285	0.241576	0.949766	0.305477	1	0.0661023	0.999338
ENSG00000021762	OSBPL5	7.79623	-0.189439	0.837417	0.0765599	0.983577	0.0294522	1	0.0166609	1
ENSG00000021776	AQR	80.0786	-0.28053	0.788935	-0.706037	0.451493	-0.0825695	1	0.0878399	0.999338
ENSG00000021826	CPS1	5.77155	0.322675	NA	0.27604	0.819133	0.0533963	1	0.411386	0.604564
ENSG00000021852	C8B	0	NA	NA	NA	NA	NA	NA	NA	NA
ENSG00000022267	FHL1	145.149	0.118728	0.898852	0.0109082	0.995777	-0.227962	1	0.176393	0.991535
ENSG00000022277	RTF2	246.057	0.241791	0.651606	0.0446595	0.985396	-0.0842784	1	0.103962	0.999338
ENSG00000022355	GABRA1	0	NA	NA	NA	NA	NA	NA	NA	NA
ENSG00000022556	NLRP2	0.154251	0	NA	-0.0179602	NA	0	NA	-0.0298733	NA
ENSG00000022567	SLC45A4	3.82371	-0.0190604	NA	0.0812802	NA	0.347925	1	0.289152	0.940536
ENSG00000022840	RNF10	91.1792	-1.54217	6.48956e-07	-0.207592	0.948634	-0.0863403	1	-0.460779	0.746364
ENSG00000022976	ZNF839	21.824	-0.130633	0.926468	-0.357556	0.879943	0.263275	1	-0.667387	0.551544
ENSG00000023041	ZDHHC6	154.112	0.0535728	0.966182	-0.149806	0.958082	-0.156783	1	-0.206582	0.979719
ENSG00000023171	GRAMD1B	10.0901	-0.149276	0.909909	-0.223204	0.950911	-0.0397534	1	0.011364	1
ENSG00000023191	RNH1	212.453	0.196982	0.75768	0.284187	0.808608	0.0904853	1	0.228386	0.948537
ENSG00000023228	NDUFS1	470.545	-0.179599	0.77828	-0.0394232	0.987637	-0.0901994	1	-0.39097	0.623784
ENSG00000023287	RB1CC1	65.6621	-0.546774	0.305326	-0.163205	0.957424	-0.365594	1	0.319101	0.9249
ENSG00000023318	ERP44	292.331	0.665371	0.00639896	0.663424	0.015294	0.363544	0.89537	0.354342	0.562957
ENSG00000023330	ALAS1	92.091	0.716637	0.0927067	0.451477	0.647096	0.330169	1	0.495545	0.623784
ENSG00000023445	BIRC3	2.17055	0.226105	NA	0.0968243	NA	-0.0186052	1	0.218334	0.935793
ENSG00000023516	AKAP11	16.6983	0.0389579	0.980614	-0.0453793	0.991922	0.119138	1	0.411875	0.903312
ENSG00000023572	GLRX2	70.9394	-0.102528	0.911568	-0.381079	0.665493	-0.0912411	1	-0.192963	0.976063
ENSG00000023608	SNAPC1	69.9748	-0.0555243	0.965512	-0.245199	0.913045	0.0055895	1	-0.747917	0.119378
ENSG00000023697	DERA	230.77	0.339191	0.462584	0.0801082	0.972276	0.00624697	1	-0.0611939	0.999338
ENSG00000023734	STRAP	99.1008	0.356507	0.487498	0.109693	0.964599	-0.0196034	1	0.261445	0.922309
ENSG00000023839	ABCC2	1.92127	0.17777	NA	-0.104877	NA	0.174592	1	0.0821998	0.999338
ENSG00000023892	DEF6	4.03482	0.603489	NA	0.729094	NA	0.0422696	1	0.209273	0.999338
ENSG00000023902	PLEKHO1	63.9634	-0.195249	0.774724	0.106351	0.966947	0.0767473	1	0.52508	0.409581
ENSG00000023909	GCLM	48.6929	-0.399318	0.648729	-0.0128225	0.996823	0.151342	1	0.105312	0.999338
ENSG00000024048	UBR2	88.1051	-0.877005	0.105275	-0.67801	0.471565	-0.187421	1	-0.393398	0.912823
ENSG00000024422	EHD2	0.806821	0.0210029	NA	0.09676	NA	0.109089	NA	0.0028805	NA
ENSG00000024526	DEPDC1	62.2747	0.259912	0.674785	-0.0852432	0.973767	0.0770252	1	-0.118191	0.999338
ENSG00000024862	CCDC28A	118.833	-0.236535	0.714874	0.0360027	0.988432	0.236304	1	0.127773	0.999338
ENSG00000025039	RRAGD	104.526	-0.534052	0.398055	-0.0687509	0.985082	0.27841	1	0.0262598	1
ENSG00000025156	HSF2	33.1244	-0.171637	0.878194	-0.325015	0.877376	-0.337814	1	-0.269504	0.96916
ENSG00000025293	PHF20	72.2188	0.631626	0.259239	0.0926823	0.982477	0.147008	1	0.253786	0.975142
ENSG00000025423	HSD17B6	14.9787	-0.0785855	0.96269	0.186262	0.960466	0.006197	1	-0.129971	0.999338
ENSG00000025434	NR1H3	11.207	0.454894	0.595474	0.249774	0.948634	0.278993	1	-0.242836	0.99258
ENSG00000025708	TYMP	2.3302	0.206411	NA	-0.0133533	NA	0.148873	1	0.146746	0.999338
ENSG00000025770	NCAPH2	101.836	-0.465694	0.223401	-0.54093	0.243119	-0.323425	1	-0.659879	0.0684478
ENSG00000025772	TOMM34	164.764	0.0542527	0.939354	0.177368	0.879823	0.265149	1	0.342248	0.515168
ENSG00000025796	SEC63	218.207	0.446156	0.222359	0.287975	0.768186	0.428369	0.822673	0.192164	0.962754
ENSG00000025800	KPNA6	98.7984	0.393514	0.531251	0.036183	0.991922	0.264065	1	0.118019	0.999338
ENSG00000026025	VIM	530.47	0.666392	0.0337595	-0.0296858	0.991922	0.396031	0.982004	0.0352059	0.999338
ENSG00000026036	RTEL1-TNFRSF6B	0	NA	NA	NA	NA	NA	NA	NA	NA
ENSG00000026103	FAS	48.7259	0.372657	0.647225	0.360551	0.846617	0.230322	1	-0.307912	0.952757
ENSG00000026297	RNASET2	44.3557	0.00521665	0.997943	-0.0495354	0.987637	-0.117315	1	-0.20093	0.986519
ENSG00000026508	CD44	19.0516	1.2081	0.0103155	-0.138205	0.970778	-0.182717	1	-0.694806	0.521816
ENSG00000026559	KCNG1	2.82343	-0.156677	NA	0.047695	NA	-0.101678	1	0.0209539	1
ENSG00000026652	AGPAT4	49.9054	-0.334116	0.683746	0.25254	0.935313	-0.423191	1	0.130995	0.999338
ENSG00000026751	SLAMF7	0	NA	NA	NA	NA	NA	NA	NA	NA
ENSG00000026950	BTN3A1	11.9322	-0.0259846	0.987694	-0.196986	0.957424	-0.267608	1	0.301656	0.970106
ENSG00000027001	MIPEP	30.4126	0.105247	0.942538	0.190342	0.958082	0.252978	1	0.311323	0.968092
ENSG00000027075	PRKCH	13.2985	0.272286	0.784366	0.17115	0.962731	0.0575579	1	0.0829215	0.999338
ENSG00000027644	INSRR	0.0656223	0	NA	0	NA	0	NA	-0.0159999	NA
ENSG00000027697	IFNGR1	129.521	-0.159687	0.858679	-0.355899	0.772126	-0.0434647	1	-0.324036	0.883195
ENSG00000027847	B4GALT7	41.4451	-0.15549	0.894373	-0.100195	0.980732	-0.135974	1	-0.0156417	1
ENSG00000027869	SH2D2A	4.0329	0.218666	NA	0.276569	NA	0.249924	1	-0.29044	0.929188
ENSG00000028116	VRK2	82.5106	-0.168489	0.891291	-0.114793	0.974946	-0.343935	1	-0.0690894	0.999338
ENSG00000028137	TNFRSF1B	0.113137	-0.0239869	NA	0	NA	0	NA	0	NA
ENSG00000028203	VEZT	100.293	0.373768	0.519247	0.151711	0.95569	0.287326	1	0.00523812	1
ENSG00000028277	POU2F2	0.770154	0.11485	NA	0.211226	NA	0.172157	NA	0.0981332	NA
ENSG00000028310	BRD9	61.1368	-0.678132	0.152436	-0.321364	0.854953	-0.803044	0.314682	-0.0763089	0.999338
ENSG00000028528	SNX1	234.853	-0.504675	0.161468	-0.154319	0.948861	-0.300996	1	-0.222225	0.945628
ENSG00000028839	TBPL1	184.819	0.272985	0.585613	-0.0484682	0.985082	0.0374574	1	-0.0724458	0.999338
ENSG00000029153	ARNTL2	49.8585	-0.491847	0.528388	-0.376459	0.856066	0.328882	1	-0.0946238	0.999338
ENSG00000029363	BCLAF1	106.959	0.355628	0.420079	0.15774	0.947361	0.0275142	1	0.443922	0.473195
ENSG00000029364	SLC39A9	61.7878	0.515233	0.484907	-0.543969	0.648924	0.0104345	1	-0.548823	0.718603
ENSG00000029534	ANK1	3.34167	-0.0683327	NA	-0.207221	NA	-0.293888	1	-0.240702	0.933509
ENSG00000029559	IBSP	0	NA	NA	NA	NA	NA	NA	NA	NA
ENSG00000029639	TFB1M	137.071	-0.00782785	0.994267	0.052041	0.985082	-0.398835	1	-0.392536	0.68786
ENSG00000029725	RABEP1	309.458	-0.163688	0.753295	-0.022022	0.992415	0.0325708	1	-0.157595	0.970665
ENSG00000029993	HMGB3	107.59	0.229043	0.645652	-0.3158	0.643845	-0.0581745	1	-0.193051	0.95061
ENSG00000030066	NUP160	133.746	-0.180955	0.877408	-0.0162188	0.995179	0.0156638	1	0.122417	0.999338
ENSG00000030110	BAK1	20.1446	0.412706	0.627316	0.289709	0.921431	0.268015	1	0.185126	0.999338
ENSG00000030304	MUSK	0	NA	NA	NA	NA	NA	NA	NA	NA
ENSG00000030419	IKZF2	4.35305	-0.0367629	NA	0.021271	NA	-0.120931	1	-0.143278	0.999338
ENSG00000030582	GRN	206.135	0.314633	0.410522	-0.0340725	0.987637	-0.168232	1	0.168066	0.96916
ENSG00000031003	FAM13B	44.2407	0.325936	0.743792	0.262901	0.94556	0.370295	1	0.18822	0.999338
ENSG00000031081	ARHGAP31	3.88053	-0.0873837	NA	0.0419009	NA	-0.0610668	1	-0.00669169	1
ENSG00000031691	CENPQ	167.447	0.155568	0.837977	0.272817	0.836309	0.0542699	1	0.0863445	0.999338
ENSG00000031698	SARS	384.427	0.0401533	0.963356	-0.234373	0.808608	-0.31321	1	-0.0692469	0.999338
ENSG00000031823	RANBP3	236.362	0.0470435	0.962942	0.0623425	0.982865	0.0704061	1	-0.0157017	1
ENSG00000032219	ARID4A	91.0607	-0.180815	0.886901	-0.726903	0.394039	-0.120289	1	-0.681154	0.506537
ENSG00000032389	EIPR1	215.733	0.0519597	0.96587	-0.132503	0.962137	0.336964	1	-0.254485	0.951347
ENSG00000032444	PNPLA6	13.7564	0.146751	0.914302	0.390486	0.847191	0.0831558	1	0.296791	0.970794
ENSG00000032742	IFT88	83.8715	0.116279	0.938136	-0.0551114	0.988151	0.119022	1	0.0586486	0.999338
ENSG00000033011	ALG1	29.8467	0.736494	0.198583	0.160032	0.964325	0.314815	1	0.109329	0.999338
ENSG00000033030	ZCCHC8	59.5551	-0.136215	0.914209	-0.170669	0.960237	-0.330065	1	-0.40004	0.883195
ENSG00000033050	ABCF2	31.0556	0.224046	0.80304	0.0122793	0.996467	0.10011	1	0.458315	0.77778
ENSG00000033100	CHPF2	6.23077	0.215449	NA	-0.176123	0.963654	-0.0183758	1	0.332216	0.96148
ENSG00000033122	LRRC7	5.07389	0.371769	NA	0.558655	0.451939	0.406797	1	0.657932	0.29151
ENSG00000033170	FUT8	48.3579	-0.0226178	0.989203	-0.666603	0.471755	0.0458271	1	-0.371626	0.926957
ENSG00000033178	UBA6	55.3092	0.176672	0.893434	0.63527	0.546238	0.433931	1	0.415255	0.897393
ENSG00000033327	GAB2	3.03212	0.159346	NA	0.0797931	NA	0.0660166	1	0.0440857	0.999338
ENSG00000033627	ATP6V0A1	116.55	0.404052	0.478104	0.274236	0.877376	0.274955	1	0.0743058	0.999338
ENSG00000033800	PIAS1	95.9708	0.0223223	0.989073	0.276827	0.926745	-0.267408	1	0.0480924	0.999508
ENSG00000033867	SLC4A7	30.385	-0.528331	0.502636	0.0362618	0.992453	-0.0342324	1	-0.132925	0.999338
ENSG00000034053	APBA2	19.2116	-0.298952	0.773039	0.0644765	0.987637	-0.27443	1	0.182029	0.999338
ENSG00000034152	MAP2K3	54.945	-0.203788	0.864136	0.140907	0.96813	-0.439888	1	-0.0354391	1
ENSG00000034239	EFCAB1	0	NA	NA	NA	NA	NA	NA	NA	NA
ENSG00000034510	TMSB10	555.512	0.205268	0.77828	-0.0311829	0.992031	-0.0349166	1	-0.194019	0.977714
ENSG00000034533	ASTE1	10.0095	-0.109683	0.939606	0.124795	0.972276	-0.216904	1	-0.0734568	0.999338
ENSG00000034677	RNF19A	11.3585	-0.186721	0.866433	-0.0394559	0.992031	0.172607	1	-0.212847	0.997488
ENSG00000034693	PEX3	184.374	0.203115	0.752202	0.186747	0.932157	0.00812189	1	-0.0890167	0.999338
ENSG00000034713	GABARAPL2	196.911	-0.122715	0.825001	0.258216	0.738408	-0.451458	0.407943	0.095139	0.999338
ENSG00000034971	MYOC	0	NA	NA	NA	NA	NA	NA	NA	NA
ENSG00000035115	SH3YL1	34.5055	-0.0713283	0.96587	-0.304944	0.918942	-0.381338	1	-0.162725	0.999338
ENSG00000035141	FAM136A	165.961	0.135677	0.849754	0.0638112	0.982865	0.0329547	1	0.0305346	0.999508
ENSG00000035403	VCL	162.381	0.504812	0.401445	0.184168	0.952617	-0.133929	1	-0.0624209	0.999338
ENSG00000035499	DEPDC1B	175.494	-0.175775	0.772449	-0.417705	0.451939	0.0423104	1	-0.331793	0.750587
ENSG00000035664	DAPK2	6.06036	0.00223142	NA	-0.0391581	0.987756	-0.013458	1	-0.0921674	0.999338
ENSG00000035681	NSMAF	51.511	-0.361983	0.705637	0.1277	0.973498	-0.40928	1	-0.316739	0.968668
ENSG00000035687	ADSS	54.5647	0.159453	0.861407	0.324473	0.825776	-0.0136255	1	0.250707	0.962319
ENSG00000035720	STAP1	0.141167	0	NA	0	NA	0	NA	-0.0437468	NA
ENSG00000035862	TIMP2	32.0214	-0.3606	0.640108	-0.341462	0.848334	-0.193833	1	0.00405626	1
ENSG00000035928	RFC1	257.637	0.0694401	0.94711	0.0703276	0.982865	0.229281	1	0.34248	0.81685
ENSG00000036054	TBC1D23	71.1756	0.123237	0.930489	0.0594257	0.987694	0.13361	1	0.285613	0.974828
ENSG00000036257	CUL3	63.9961	-1.02794	0.0251029	-0.061324	0.987145	-0.154312	1	-0.0153263	1
ENSG00000036448	MYOM2	21.1932	-0.127367	0.923937	-0.408928	0.817234	-0.342456	1	-1.11429	0.0244449
ENSG00000036473	OTC	0	NA	NA	NA	NA	NA	NA	NA	NA
ENSG00000036530	CYP46A1	1.17537	0.0416319	NA	-0.0662337	NA	-0.166961	1	0.0613494	NA
ENSG00000036549	AC118549.1	55.1255	0.0929682	0.950838	-0.311194	0.906972	-0.432289	1	-0.0612282	0.999338
ENSG00000036565	SLC18A1	0	NA	NA	NA	NA	NA	NA	NA	NA
ENSG00000036672	USP2	1.76359	0.0180742	NA	0.0430174	NA	0.00124375	1	0.126887	NA
ENSG00000036828	CASR	0	NA	NA	NA	NA	NA	NA	NA	NA
ENSG00000037042	TUBG2	54.6058	0.115956	0.911374	-0.38227	0.739193	-0.124749	1	-0.168863	0.999338
ENSG00000037241	RPL26L1	44.5842	0.320831	0.658009	-0.206384	0.94556	0.203737	1	0.181385	0.999338
ENSG00000037280	FLT4	44.8459	-0.300534	0.739147	-0.00435609	0.998242	0.200149	1	0.313807	0.957983
ENSG00000037474	NSUN2	187.051	-0.443291	0.370625	-0.56636	0.324203	-0.403533	1	-0.399616	0.748373
ENSG00000037637	FBXO42	48.199	-0.0983704	0.950336	-0.026017	0.993678	-0.172882	1	0.135844	0.999338
ENSG00000037749	MFAP3	9.82196	0.332049	0.739806	-0.204489	0.956806	-0.0221674	1	-0.162777	0.999338
ENSG00000037757	MRI1	13.2251	0.24032	0.829953	0.114019	0.979147	0.236697	1	0.271724	0.977681
ENSG00000037897	METTL1	14.999	-0.0415626	0.979127	0.0270286	0.993495	0.0634567	1	-0.132997	0.999338
ENSG00000037965	HOXC8	10.417	-0.265525	0.808558	0.0269523	0.993577	-0.177797	1	0.0237197	1
ENSG00000038002	AGA	82.2008	0.823681	0.0501151	0.180174	0.952617	0.428801	1	-0.313037	0.92508
ENSG00000038210	PI4K2B	10.1992	0.173685	0.894745	0.0664502	0.986574	0.252243	1	0.493634	0.824325
ENSG00000038219	BOD1L1	49.7052	-0.1722	0.891291	0.143686	0.96813	-0.644414	0.903973	-0.348593	0.93997
ENSG00000038274	MAT2B	222.918	0.0655358	0.930564	-0.204074	0.852521	-0.151432	1	0.0121465	1
ENSG00000038295	TLL1	4.27335	0.0725129	NA	-0.166852	NA	0.114268	1	-0.105706	0.999338
ENSG00000038358	EDC4	11.3337	-0.226166	0.849754	0.374597	0.871602	0.605805	1	0.235407	0.999338
ENSG00000038382	TRIO	28.2689	0.0618207	0.969742	-0.267231	0.94519	-0.290295	1	0.392039	0.920005
ENSG00000038427	VCAN	108.395	0.512108	0.43562	-0.654568	0.40368	-0.129797	1	0.0210499	1
ENSG00000038532	CLEC16A	15.9618	-0.00785567	0.996857	0.0687228	0.986021	0.00153056	1	-0.025702	1
ENSG00000038945	MSR1	0	NA	NA	NA	NA	NA	NA	NA	NA
ENSG00000039068	CDH1	4.86493	-0.0359358	NA	0.0752172	0.983655	-0.283875	1	-0.428642	0.789637
ENSG00000039123	MTREX	322.44	-0.0940494	0.938251	0.0127966	0.995756	-0.187695	1	-0.461847	0.735681
ENSG00000039139	DNAH5	1.3055	-0.0111914	NA	-0.174151	NA	-0.136258	1	0	NA
ENSG00000039319	ZFYVE16	49.1906	0.120079	0.934602	-0.458974	0.782906	0.250184	1	-0.397595	0.909937
ENSG00000039523	RIPOR1	10.9048	0.482197	0.563627	0.33044	0.905965	0.0276187	1	0.35385	0.950798
ENSG00000039537	C6	0	NA	NA	NA	NA	NA	NA	NA	NA
ENSG00000039560	RAI14	79.4049	0.269413	0.757217	0.152233	0.964107	-0.0849365	1	0.788078	0.202769
ENSG00000039600	SOX30	0.0941114	0	NA	0	NA	0	NA	-0.0298733	NA
ENSG00000039650	PNKP	22.0691	-0.487471	0.525841	0.198432	0.956886	-0.298961	1	-0.310297	0.966553
ENSG00000039987	BEST2	0.182339	0.0176334	NA	0.00978658	NA	0.0124409	NA	-0.00212653	NA
ENSG00000040199	PHLPP2	14.07	0.158275	0.898795	0.390182	0.826038	0.216835	1	-0.0368743	1
ENSG00000040275	SPDL1	227.946	0.35298	0.351822	-0.214738	0.852521	-0.351222	0.967213	-0.266379	0.833928
ENSG00000040341	STAU2	24.3272	-0.451368	0.501795	-0.0893543	0.982945	0.0571591	1	0.462522	0.800037
ENSG00000040487	PQLC2	41.4774	-0.156748	0.887424	0.34156	0.851571	-0.0602201	1	0.282109	0.962754
ENSG00000040531	CTNS	26.3001	0.550639	0.466057	-0.0532702	0.988388	-0.02608	1	0.384234	0.92519
ENSG00000040608	RTN4R	7.96682	0.193411	0.880239	0.413356	0.83123	-0.478901	1	-0.0818266	0.999338
ENSG00000040633	PHF23	49.0926	-1.01746	0.000477938	-0.683023	0.144661	-0.515601	0.822673	-0.405792	0.746364
ENSG00000040731	CDH10	0.0574082	0.0176334	NA	0.00978658	NA	0.0124409	NA	0.0117469	NA
ENSG00000040933	INPP4A	31.7553	0.0235439	0.989073	0.0163666	0.995215	0.123533	1	-0.101275	0.999338
ENSG00000041353	RAB27B	7.18523	0.400661	0.665603	0.439137	0.808608	-0.0583844	1	-0.668308	0.564622
ENSG00000041357	PSMA4	3523.25	-0.0270254	0.959037	0.149102	0.791018	0.216498	0.905865	0.105459	0.962754
ENSG00000041515	MYO16	0.0527428	0	NA	0	NA	0	NA	0	NA
ENSG00000041802	LSG1	53.2016	-0.341857	0.685673	-0.418372	0.79199	0.17827	1	-0.417219	0.856338
ENSG00000041880	PARP3	4.25469	-0.300119	NA	0.0956695	NA	-0.53963	1	-0.118643	0.999338
ENSG00000041982	TNC	28.6789	0.491779	0.5002	0.0671724	0.986532	0.0602057	1	-0.246431	0.981113
ENSG00000041988	THAP3	59.1579	0.318704	0.647225	0.722544	0.183872	0.33995	1	0.27974	0.94202
ENSG00000042062	RIPOR3	0.0587261	0.0176334	NA	0.00978658	NA	0.0124409	NA	0.0117469	NA
ENSG00000042088	TDP1	87.255	-0.146047	0.896277	-0.476071	0.665029	-0.233071	1	-0.545449	0.600356
ENSG00000042286	AIFM2	61.7759	0.0692495	0.963356	-0.269829	0.922264	-0.403618	1	-0.182732	0.999338
ENSG00000042304	C2orf83	0	NA	NA	NA	NA	NA	NA	NA	NA
ENSG00000042317	SPATA7	29.5933	0.352836	0.714681	-0.382075	0.85979	0.583317	1	-0.339572	0.959161
ENSG00000042429	MED17	1.58156	0.201138	NA	0.186453	NA	0.229724	1	0.321456	NA
ENSG00000042445	RETSAT	21.1868	0.42925	0.6243	-0.0844995	0.983916	0.0150666	1	0.0325088	1
ENSG00000042493	CAPG	25.6665	0.354002	0.712032	0.117662	0.977608	-0.000673847	1	-0.508401	0.802034
ENSG00000042753	AP2S1	723.619	0.0158437	0.983368	0.168641	0.898005	0.0449221	1	0.27915	0.754614
ENSG00000042781	USH2A	0.0837797	0.0176334	NA	0.00978658	NA	0.0124409	NA	0.0117469	NA
ENSG00000042813	ZPBP	0	NA	NA	NA	NA	NA	NA	NA	NA
ENSG00000042832	TG	0.0483616	0.0176334	NA	0.00978658	NA	0.0124409	NA	0.0117469	NA
ENSG00000042980	ADAM28	0	NA	NA	NA	NA	NA	NA	NA	NA
ENSG00000043039	BARX2	10.6394	1.04368	0.0372242	0.792804	0.329911	0.422049	1	0.10957	0.999338
ENSG00000043093	DCUN1D1	26.1554	-0.110618	0.930532	-0.356063	0.845232	-0.0920033	1	-0.101158	0.999338
ENSG00000043143	JADE2	8.54346	-0.328546	0.693848	-0.0883774	0.982945	-0.357169	1	-0.192892	0.999338
ENSG00000043355	ZIC2	41.97	-0.186135	0.840961	-0.0752998	0.983655	0.0937052	1	-0.194331	0.993615
ENSG00000043462	LCP2	0	NA	NA	NA	NA	NA	NA	NA	NA
ENSG00000043514	TRIT1	51.8328	-0.108118	0.93868	0.0885842	0.983655	-0.28703	1	0.304366	0.966553
ENSG00000043591	ADRB1	0.286939	0	NA	-0.0318336	NA	-0.0153059	NA	0	NA
ENSG00000044012	GUCA2B	0	NA	NA	NA	NA	NA	NA	NA	NA
ENSG00000044090	CUL7	16.9172	0.143514	0.908364	0.518069	0.682124	0.255038	1	0.196667	0.999338
ENSG00000044115	CTNNA1	95.2374	0.569856	0.147088	-0.161271	0.949766	-0.1419	1	0.0651756	0.999338
ENSG00000044446	PHKA2	31.2381	0.262201	0.799907	0.225587	0.950472	0.19238	1	0.0230434	1
ENSG00000044459	CNTLN	57.5453	0.431244	0.58523	0.193309	0.95569	0.030589	1	0.29153	0.96916
ENSG00000044524	EPHA3	14.0769	-0.111226	0.936367	-0.204772	0.952617	0.135034	1	-0.219588	0.997488
ENSG00000044574	HSPA5	200.679	0.437234	0.108588	0.0900025	0.962137	0.185155	1	0.0846343	0.999338
ENSG00000046604	DSG2	103.957	-0.0185366	0.99056	-0.473447	0.712499	-0.0751489	1	-0.363359	0.911056
ENSG00000046647	GEMIN8	52.4637	0.276155	0.72346	-0.0252932	0.992453	0.0455704	1	0.0341436	1
ENSG00000046651	OFD1	25.8642	0.180191	0.869625	0.212275	0.949766	0.115175	1	-0.0831442	0.999338
ENSG00000046653	GPM6B	72.116	0.304916	0.70103	0.756192	0.209329	0.0127489	1	0.37776	0.868471
ENSG00000046774	MAGEC2	0	NA	NA	NA	NA	NA	NA	NA	NA
ENSG00000046889	PREX2	6.34874	-0.115557	NA	-0.291246	0.729421	-0.104063	1	0.0559227	0.999338
ENSG00000047056	WDR37	27.1399	0.201458	0.87288	0.195039	0.958082	0.0850045	1	0.375829	0.931968
ENSG00000047188	YTHDC2	98.8998	0.547415	0.436523	0.912221	0.147211	0.525674	1	0.278058	0.974955
ENSG00000047230	CTPS2	64.514	0.508324	0.517118	-0.111105	0.980642	-0.201917	1	-0.584603	0.688521
ENSG00000047249	ATP6V1H	317.471	-0.162276	0.874598	-0.0309595	0.992453	-0.167817	1	-0.0860001	0.999338
ENSG00000047315	POLR2B	252.315	-0.00440227	0.997943	-0.174024	0.949766	0.163069	1	-0.0467556	0.999338
ENSG00000047346	FAM214A	7.89516	-0.199629	0.840086	0.0374575	0.992031	0.174854	1	-0.0338592	1
ENSG00000047365	ARAP2	5.7903	-0.3096	NA	0.163879	0.957424	0.203329	1	0.10002	0.999338
ENSG00000047410	TPR	356.202	0.160123	0.824359	0.0333663	0.988432	0.155438	1	0.03751	0.999338
ENSG00000047457	CP	0.352128	-0.0983633	NA	0	NA	0	NA	0	NA
ENSG00000047578	KIAA0556	14.9996	0.0883434	0.951652	0.061199	0.986574	0.0156841	1	-0.0649881	0.999338
ENSG00000047579	DTNBP1	184.467	0.365346	0.592819	0.199496	0.948634	0.04215	1	0.14319	0.999338
ENSG00000047597	XK	5.74938	-0.0874343	NA	0.232807	0.94556	0.142346	1	-0.418329	0.848388
ENSG00000047617	ANO2	2.36528	0.0376286	NA	0.0374253	NA	0.0374899	1	-0.0526	0.999338
ENSG00000047621	C12orf4	74.078	0.197345	0.863625	-0.43209	0.793081	0.0510933	1	0.0302232	1
ENSG00000047634	SCML1	289.454	0.320791	0.377741	0.136788	0.94556	0.168502	1	0.300532	0.722678
ENSG00000047644	WWC3	22.209	-0.599043	0.402752	-0.112542	0.980642	0.141975	1	-0.0269201	1
ENSG00000047648	ARHGAP6	0.0726532	0	NA	-0.0179602	NA	0	NA	0	NA
ENSG00000047662	FAM184B	0.949608	-0.0250938	NA	-0.212526	NA	-0.0185637	NA	0	NA
ENSG00000047849	MAP4	86.8107	0.435288	0.595474	0.392108	0.834257	0.13356	1	0.233596	0.99258
ENSG00000047932	GOPC	63.4336	-0.0747844	0.948755	0.278177	0.878542	0.359447	1	0.149589	0.999338
ENSG00000047936	ROS1	0.293631	0.073127	NA	0.0652802	NA	0.0679345	NA	0.0672405	NA
ENSG00000048028	USP28	74.8683	-0.269123	0.791229	-0.0943077	0.983577	-0.319087	1	0.0479043	0.999508
ENSG00000048052	HDAC9	3.85973	-0.476901	NA	-0.0187666	NA	-0.0808683	1	-0.117198	0.999338
ENSG00000048140	TSPAN17	28.7451	0.0502866	0.97605	0.167657	0.964599	0.0966001	1	0.334804	0.960623
ENSG00000048162	NOP16	123.574	0.339563	0.506349	0.409142	0.57147	0.292495	1	0.420233	0.60637
ENSG00000048342	CC2D2A	22.5872	0.00370152	0.997943	0.360665	0.81672	0.171164	1	0.0794311	0.999338
ENSG00000048392	RRM2B	63.0884	0.0179772	0.990933	0.562872	0.575609	-0.108296	1	-0.154352	0.999338
ENSG00000048405	ZNF800	16.8374	-0.40512	0.658009	-0.343055	0.893239	-0.0462657	1	-0.318387	0.968092
ENSG00000048462	TNFRSF17	0.0587261	0.0176334	NA	0.00978658	NA	0.0124409	NA	0.0117469	NA
ENSG00000048471	SNX29	9.38423	0.736754	0.159996	0.545858	0.582343	0.567023	0.974441	0.659251	0.433519
ENSG00000048540	LMO3	0	NA	NA	NA	NA	NA	NA	NA	NA
ENSG00000048544	MRPS10	145.613	-0.00245757	0.997943	0.129958	0.949992	0.187811	1	0.0394269	0.999338
ENSG00000048545	GUCA1A	0	NA	NA	NA	NA	NA	NA	NA	NA
ENSG00000048649	RSF1	122.664	0.550297	0.202946	0.220185	0.917746	0.35301	1	0.323063	0.865715
ENSG00000048707	VPS13D	17.1966	-0.0167736	0.991957	0.0157957	0.995215	-0.0535376	1	-0.449798	0.845998
ENSG00000048740	CELF2	130.654	-0.131758	0.89536	-0.0881424	0.979147	-0.117124	1	-0.0054016	1
ENSG00000048828	FAM120A	70.3789	-0.971692	0.0313115	-0.310606	0.896952	-0.545403	1	-0.353993	0.925638
ENSG00000048991	R3HDM1	110.583	-0.000738175	0.999488	-0.230665	0.949766	-0.28291	1	-0.283093	0.973633
ENSG00000049089	COL9A2	2.80541	-0.0602584	NA	0.0970272	NA	0.125871	1	-0.0696957	0.999338
ENSG00000049130	KITLG	43.762	0.775689	0.192239	0.732314	0.402451	0.294981	1	0.309483	0.96916
ENSG00000049167	ERCC8	88.1292	-0.210067	0.846753	-0.172411	0.960237	-0.0674972	1	-0.373564	0.911056
ENSG00000049192	ADAMTS6	7.04661	0.210302	NA	0.0369781	0.991929	0.259795	1	0.38113	0.845998
ENSG00000049239	H6PD	8.63024	-0.385618	0.650455	-0.202956	0.952617	-0.315852	1	-0.127761	0.999338
ENSG00000049245	VAMP3	98.5258	-0.0716832	0.950283	-0.0308206	0.992415	-0.042143	1	0.086135	0.999338
ENSG00000049246	PER3	3.68852	0.161675	NA	0.721978	NA	0.853096	0.309638	0.69252	0.337954
ENSG00000049247	UTS2	0.748296	0.0158355	NA	-0.0321085	NA	-0.0352504	NA	0.0278726	NA
ENSG00000049249	TNFRSF9	2.38904	0.224253	NA	0.035592	NA	-0.242582	1	-0.000958683	1
ENSG00000049283	EPN3	0.324543	0.00375994	NA	0.00978658	NA	-0.0153059	NA	-0.00212653	NA
ENSG00000049323	LTBP1	67.7122	0.0510235	0.974305	-0.0799508	0.984217	0.680112	0.840793	0.975156	0.0958938
ENSG00000049449	RCN1	38.6749	0.393614	0.56727	0.0179884	0.994754	-0.320921	1	-0.324218	0.917029
ENSG00000049540	ELN	0.114246	-0.0378603	NA	0	NA	0	NA	0	NA
ENSG00000049541	RFC2	590.084	0.246085	0.675412	-0.10023	0.966145	0.126542	1	0.00886267	1
ENSG00000049618	ARID1B	61.779	0.414204	0.55941	0.295928	0.893445	0.35703	1	-0.184749	0.999338
ENSG00000049656	CLPTM1L	412.028	-0.558224	0.0502085	-0.257236	0.793616	-0.441078	0.674537	0.318566	0.746364
ENSG00000049759	NEDD4L	99.7011	-0.140612	0.917576	-0.184915	0.960186	-0.375741	1	0.12725	0.999338
ENSG00000049768	FOXP3	0	NA	NA	NA	NA	NA	NA	NA	NA
ENSG00000049769	PPP1R3F	13.1875	-0.760521	0.217875	-0.321633	0.909699	-0.156899	1	-0.323366	0.962754
ENSG00000049860	HEXB	379.672	-0.523873	0.228386	-0.155557	0.952617	-0.268324	1	-0.30026	0.890746
ENSG00000049883	PTCD2	10.8877	0.280912	0.789191	-0.311819	0.915632	-0.0880108	1	-0.0404293	1
ENSG00000050030	NEXMIF	0.203438	-0.0239869	NA	0	NA	0	NA	0	NA
ENSG00000050130	JKAMP	153.086	0.0116722	0.99259	-0.517543	0.488434	-0.133263	1	-0.492493	0.596334
ENSG00000050165	DKK3	2.76119	-0.535706	NA	-0.363851	NA	-0.242253	1	0	1
ENSG00000050327	ARHGEF5	16.1504	-0.108051	0.942538	-0.52274	0.716156	-0.110037	1	-0.180753	0.999338
ENSG00000050344	NFE2L3	16.447	-0.00966931	0.995469	-0.0352951	0.992453	-0.556963	1	-0.0775741	0.999338
ENSG00000050393	MCUR1	49.9236	0.074834	0.949894	0.200442	0.946161	0.145078	1	0.366706	0.844974
ENSG00000050405	LIMA1	120.515	0.58257	0.274157	0.253625	0.918942	0.428383	1	0.177152	0.999338
ENSG00000050426	LETMD1	50.8617	-0.211449	0.8185	-0.0622616	0.985964	-0.251429	1	0.104726	0.999338
ENSG00000050438	SLC4A8	2.08006	0.0400881	NA	0.0264269	NA	0.0399249	1	-0.0467648	0.999338
ENSG00000050555	LAMC3	13.8141	-0.0680927	0.959253	-0.0138073	0.995179	0.422693	1	-0.0165911	1
ENSG00000050628	PTGER3	0.524976	0.103782	NA	0.100161	NA	0.101041	NA	0.0753703	NA
ENSG00000050730	TNIP3	0.135486	-0.0239869	NA	0	NA	-0.0153059	NA	0	NA
ENSG00000050748	MAPK9	164.973	0.0970683	0.929414	-0.0684665	0.983655	0.207564	1	-0.359591	0.843468
ENSG00000050767	COL23A1	2.14801	-0.0345835	NA	0.0184797	NA	0.012847	1	0.0185353	0.999338
ENSG00000050820	BCAR1	30.2399	0.122323	0.914654	0.65369	0.380122	0.302072	1	0.603737	0.491102
ENSG00000051009	FAM160A2	8.63135	0.189433	0.870672	0.180399	0.958082	0.0516587	1	0.291395	0.96916
ENSG00000051108	HERPUD1	63.5487	0.211056	0.82593	0.0243724	0.99327	-0.261806	1	0.0888057	0.999338
ENSG00000051128	HOMER3	21.4945	-0.770709	0.115914	-0.122512	0.972276	-0.193225	1	0.422472	0.863707
ENSG00000051180	RAD51	2.91761	-0.0466155	NA	-0.138366	NA	-0.0718169	1	0.218547	0.992571
ENSG00000051341	POLQ	31.6144	0.295771	0.772449	0.0355055	0.992453	-0.05935	1	0.0127362	1
ENSG00000051382	PIK3CB	24.7948	-0.322574	0.705711	0.427635	0.768186	0.129295	1	0.268968	0.96916
ENSG00000051523	CYBA	1153.79	-0.0591856	0.938251	-0.395582	0.358081	-0.20477	1	-0.218879	0.890746
ENSG00000051596	THOC3	182.394	0.267486	0.498977	0.124624	0.949766	0.192281	1	-0.133144	0.983822
ENSG00000051620	HEBP2	441.523	-0.349656	0.201303	0.208563	0.798968	-0.0716168	1	0.275399	0.678898
ENSG00000051825	MPHOSPH9	85.0241	0.222778	0.830748	-0.164253	0.963361	0.389169	1	0.158161	0.999338
ENSG00000052126	PLEKHA5	224.456	0.153516	0.864029	-0.104044	0.969577	-0.0435457	1	-0.150679	0.999338
ENSG00000052344	PRSS8	1.76326	0.359573	NA	0.0583777	NA	-0.0230237	1	-0.0195374	NA
ENSG00000052723	SIKE1	93.4746	-0.100304	0.924083	-0.0586266	0.985082	-0.129056	1	-0.0613592	0.999338
ENSG00000052749	RRP12	73.0405	0.050972	0.974646	0.0523677	0.988305	0.162187	1	0.240242	0.992571
ENSG00000052795	FNIP2	29.0048	0.0703918	0.966182	0.912162	0.18988	0.504624	1	0.268583	0.980057
ENSG00000052802	MSMO1	143.058	-0.165979	0.867626	-0.40948	0.739193	-0.0860698	1	-0.209055	0.986867
ENSG00000052841	TTC17	76.2748	0.071664	0.96269	0.113649	0.974946	-0.125988	1	0.0517476	0.999338
ENSG00000052850	ALX4	4.42211	0.105591	NA	-0.355255	NA	0.182551	1	-0.0748253	0.999338
ENSG00000053108	FSTL4	2.10228	0.243764	NA	0.239508	NA	0.277332	1	0.297222	0.797207
ENSG00000053254	FOXN3	14.2641	0.0411934	0.97958	-0.387556	0.846617	0.208458	1	-0.214521	0.999338
ENSG00000053328	METTL24	0.942085	0	NA	0	NA	0	NA	-0.0894091	NA
ENSG00000053371	AKR7A2	99.5917	-0.206891	0.757217	0.0571449	0.984217	0.237308	1	-0.177561	0.982611
ENSG00000053372	MRTO4	142.785	0.289163	0.637266	0.370033	0.695321	0.715178	0.200123	0.268387	0.920005
ENSG00000053438	NNAT	0	NA	NA	NA	NA	NA	NA	NA	NA
ENSG00000053501	USE1	51.0152	-0.0294795	0.980441	0.13889	0.960237	-0.139198	1	0.278473	0.932717
ENSG00000053524	MCF2L2	0.907091	-0.052395	NA	-0.0941887	NA	-0.111272	NA	0.0597945	NA
ENSG00000053702	NRIP2	0.558052	-0.059211	NA	0.0807597	NA	0.0823722	NA	0.0821214	NA
ENSG00000053747	LAMA3	65.7712	-0.0124638	0.993848	0.0480526	0.990723	0.182999	1	0.247418	0.992571
ENSG00000053770	AP5M1	59.8305	0.198517	0.864432	-0.462882	0.764866	0.246485	1	-0.176919	0.999338
ENSG00000053900	ANAPC4	92.6517	0.324923	0.744334	-0.0611247	0.987694	0.331386	1	0.572095	0.726852
ENSG00000053918	KCNQ1	4.11165	-0.696304	NA	-0.468738	NA	-0.0513792	1	-0.022968	1
ENSG00000054116	TRAPPC3	275.65	0.249728	0.58817	0.0767147	0.969577	0.0432308	1	0.0617605	0.999338
ENSG00000054118	THRAP3	279.947	0.0640607	0.939722	-0.180305	0.91484	-0.191697	1	0.100767	0.999338
ENSG00000054148	PHPT1	186.475	0.00568527	0.996596	-0.0423888	0.987145	-0.0275787	1	-0.306922	0.844974
ENSG00000054179	ENTPD2	0.716191	-0.0124515	NA	0.0230308	NA	-0.0488358	NA	-0.0295222	NA
ENSG00000054219	LY75	0	NA	NA	NA	NA	NA	NA	NA	NA
ENSG00000054267	ARID4B	229.052	-0.327983	0.510302	-0.0974359	0.96813	-0.541471	0.545151	-0.373355	0.70091
ENSG00000054277	OPN3	2.47941	-0.0264137	NA	-0.248496	NA	-0.121295	1	-0.11418	0.999338
ENSG00000054282	SDCCAG8	96.6971	0.0197613	0.986022	-0.322722	0.793448	0.179338	1	-0.357843	0.803856
ENSG00000054356	PTPRN	0.0574082	0.0176334	NA	0.00978658	NA	0.0124409	NA	0.0117469	NA
ENSG00000054392	HHAT	27.0869	0.10015	0.946851	-0.053489	0.988151	0.275518	1	-0.448943	0.856338
ENSG00000054523	KIF1B	53.7961	-0.0494095	0.976626	0.346974	0.890271	0.402213	1	0.49063	0.825482
ENSG00000054598	FOXC1	169.239	-0.286657	0.561952	0.0443992	0.986532	0.0105996	1	0.122921	0.999338
ENSG00000054611	TBC1D22A	69.2685	-0.325731	0.727547	-0.0448809	0.991922	0.161446	1	-0.0125624	1
ENSG00000054654	SYNE2	41.8939	-0.223042	0.846804	-0.52325	0.703687	-0.031423	1	-0.722746	0.43402
ENSG00000054690	PLEKHH1	7.89638	-0.169094	0.886033	-0.1192	0.972276	0.143934	1	0.291713	0.962754
ENSG00000054793	ATP9A	31.449	0.114777	0.938251	0.216466	0.952617	0.555102	1	0.125268	0.999338
ENSG00000054796	SPO11	0	NA	NA	NA	NA	NA	NA	NA	NA
ENSG00000054803	CBLN4	0	NA	NA	NA	NA	NA	NA	NA	NA
ENSG00000054938	CHRDL2	0.0601398	0	NA	-0.0179602	NA	0	NA	0	NA
ENSG00000054965	FAM168A	28.8123	0.260081	0.805489	0.182075	0.960237	-0.0199018	1	0.354179	0.941684
ENSG00000054967	RELT	3.47037	-0.351942	NA	-0.100633	NA	0.2533	1	-0.190225	0.999338
ENSG00000054983	GALC	15.4258	0.0336357	0.980614	-0.480375	0.703801	-0.853765	0.357789	-1.18904	0.00598075
ENSG00000055044	NOP58	1082.6	-0.0098745	0.989543	0.114174	0.94556	0.0343229	1	-0.101695	0.999338
ENSG00000055070	SZRD1	117.747	0.150315	0.82931	0.130664	0.95569	-0.128242	1	0.09145	0.999338
ENSG00000055118	KCNH2	2.4153	0.462036	NA	0.152171	NA	0.215937	1	0.319947	0.890746
ENSG00000055130	CUL1	39.2669	0.403481	0.581139	-0.0544324	0.987637	0.100086	1	0.0571931	0.999338
ENSG00000055147	FAM114A2	70.1104	0.702853	0.101984	-0.592332	0.358407	0.00839867	1	-0.209734	0.979147
ENSG00000055163	CYFIP2	306.34	0.41904	0.521584	0.394629	0.770505	0.493211	1	0.279919	0.957983
ENSG00000055208	TAB2	54.8672	0.533991	0.272747	0.575795	0.389845	0.464713	1	0.572384	0.416428
ENSG00000055211	GINM1	161.751	0.237132	0.742364	0.0624762	0.983916	0.180131	1	0.274901	0.929188
ENSG00000055332	EIF2AK2	110.374	-0.414098	0.526296	-0.103612	0.974523	-0.216163	1	-0.313146	0.929188
ENSG00000055483	USP36	72.353	-0.170412	0.853746	0.594499	0.389845	0.311214	1	0.670426	0.262984
ENSG00000055609	KMT2C	36.2215	0.197457	0.877577	0.15565	0.966947	0.553504	1	0.342167	0.958762
ENSG00000055732	MCOLN3	58.9815	0.322749	0.72346	0.0761642	0.985082	0.0313019	1	0.227203	0.993615
ENSG00000055813	CCDC85A	0.0900083	0	NA	0	NA	0	NA	0	NA
ENSG00000055917	PUM2	63.8686	-0.062955	0.966182	-0.136448	0.96813	0.0228911	1	0.117201	0.999338
ENSG00000055950	MRPL43	139.749	0.293145	0.318495	0.346644	0.377964	0.215626	1	0.460703	0.0985677
ENSG00000055955	ITIH4	0.102644	0	NA	0	NA	-0.0291793	NA	0	NA
ENSG00000055957	ITIH1	0.139913	0	NA	-0.0318336	NA	0	NA	0	NA
ENSG00000056050	HPF1	60.7293	0.276727	0.713621	0.46151	0.635193	0.336833	1	0.624385	0.35381
ENSG00000056097	ZFR	288.771	0.104667	0.916513	-0.436615	0.59612	0.072945	1	-0.0832104	0.999338
ENSG00000056277	ZNF280C	21.1282	-0.331302	0.735168	-0.142425	0.96813	-0.287389	1	-0.472824	0.843979
ENSG00000056291	NPFFR2	0.457921	-0.0201367	NA	-0.0316423	NA	-0.030003	NA	0	NA
ENSG00000056487	PHF21B	3.36451	0.00542071	NA	0.149078	NA	0.0200277	1	0.0786829	0.999338
ENSG00000056558	TRAF1	0.910466	-0.329209	NA	-0.0182709	NA	-0.0488697	NA	-0.0691261	NA
ENSG00000056586	RC3H2	24.7185	-0.141586	0.918838	-0.139915	0.970778	-0.301785	1	-0.503944	0.81453
ENSG00000056736	IL17RB	12.7688	0.197107	0.870672	0.724395	0.389845	0.181566	1	0.278194	0.976063
ENSG00000056972	TRAF3IP2	50.0519	0.340975	0.686072	-0.380805	0.825776	0.126845	1	-0.141816	0.999338
ENSG00000056998	GYG2	0	NA	NA	NA	NA	NA	NA	NA	NA
ENSG00000057019	DCBLD2	35.1284	-0.835933	0.0836859	-0.112122	0.974946	-0.429367	1	-0.123804	0.999338
ENSG00000057149	SERPINB3	0	NA	NA	NA	NA	NA	NA	NA	NA
ENSG00000057252	SOAT1	178.673	0.154284	0.894645	0.0882755	0.982945	-0.0321573	1	-0.164666	0.999338
ENSG00000057294	PKP2	20.1645	0.121326	0.922652	-0.0871945	0.983525	0.277254	1	0.268172	0.974406
ENSG00000057468	MSH4	0.240462	0.0176334	NA	0.00978658	NA	-0.00143249	NA	0.0117469	NA
ENSG00000057593	F7	0.114816	0.0315068	NA	0.02366	NA	0.0263143	NA	0.0256203	NA
ENSG00000057608	GDI2	396.148	-0.0410396	0.940199	-0.174388	0.788558	-0.198429	1	-0.204387	0.76503
ENSG00000057657	PRDM1	1.00584	0.0812188	NA	0.0373229	NA	0.0425807	NA	0.0358718	NA
ENSG00000057663	ATG5	299.044	0.381557	0.375502	0.166795	0.943376	-0.0349816	1	0.0429748	0.999338
ENSG00000057704	TMCC3	3.95743	-0.412176	NA	-0.023111	NA	-0.229503	1	-0.200866	0.999338
ENSG00000057757	PITHD1	95.0544	-0.174161	0.824052	0.0352881	0.988781	0.191931	1	-0.0679624	0.999338
ENSG00000057935	MTA3	34.5699	-0.0380192	0.978831	0.381032	0.825776	-0.0525497	1	-0.0736986	0.999338
ENSG00000058056	USP13	33.8884	-0.437155	0.627541	0.313853	0.915424	-0.00283265	1	0.629074	0.629986
ENSG00000058063	ATP11B	58.2909	-0.0568345	0.971754	0.0283001	0.99327	0.0887087	1	-0.0973447	0.999338
ENSG00000058085	LAMC2	2.87894	-0.12204	NA	-0.0683034	NA	-0.129773	1	-0.262131	0.881652
ENSG00000058091	CDK14	28.8954	-0.605327	0.401613	0.354014	0.885696	0.170934	1	-0.558299	0.754747
ENSG00000058262	SEC61A1	109.75	0.327422	0.647225	0.107539	0.971887	0.303141	1	0.261419	0.962319
ENSG00000058272	PPP1R12A	269.339	0.348512	0.525374	0.0872846	0.974145	-0.210561	1	-0.21588	0.96916
ENSG00000058335	RASGRF1	0.388116	0.0156552	NA	0.0098044	NA	0.0118019	NA	-0.0787169	NA
ENSG00000058404	CAMK2B	4.29304	0.100078	NA	-0.17616	NA	-0.205481	1	-0.263088	0.938735
ENSG00000058453	CROCC	12.506	0.013727	0.992779	0.319912	0.913045	-0.14642	1	0.523487	0.792296
ENSG00000058600	POLR3E	114.059	-0.419208	0.627541	-0.160635	0.964599	-0.254237	1	-0.114751	0.999338
ENSG00000058668	ATP2B4	19.8413	0.48451	0.554108	0.374337	0.865102	0.334284	1	0.236164	0.996254
ENSG00000058673	ZC3H11A	0.0587261	0.0176334	NA	0.00978658	NA	0.0124409	NA	0.0117469	NA
ENSG00000058729	RIOK2	112.517	0.104334	0.924083	-0.124898	0.966049	0.051049	1	-0.0552078	0.999338
ENSG00000058799	YIPF1	110.814	0.102546	0.911353	0.149284	0.952617	0.0902356	1	0.023814	1
ENSG00000058804	NDC1	288.367	0.479902	0.37021	0.146755	0.958082	0.0790482	1	0.19216	0.991535
ENSG00000058866	DGKG	0	NA	NA	NA	NA	NA	NA	NA	NA
ENSG00000059122	FLYWCH1	17.9814	-0.364656	0.703119	0.147239	0.96813	-0.37431	1	0.11107	0.999338
ENSG00000059145	UNKL	20.9593	0.179189	0.892192	0.0350548	0.992453	-0.149117	1	0.154616	0.999338
ENSG00000059377	TBXAS1	12.6013	-0.417171	0.626134	-0.116736	0.974946	-0.138673	1	0.186609	0.999338
ENSG00000059378	PARP12	12.1265	-0.136873	0.914654	0.423004	0.793448	0.259429	1	0.439816	0.843468
ENSG00000059573	ALDH18A1	337.068	0.430625	0.448961	0.345393	0.799262	0.190406	1	0.310951	0.909937
ENSG00000059588	TARBP1	63.3293	-0.477963	0.55292	-0.153882	0.96661	-0.160679	1	-0.159127	0.999338
ENSG00000059691	GATB	106.55	-0.256858	0.76929	-0.177224	0.95569	-0.00850762	1	-0.0436884	0.999508
ENSG00000059728	MXD1	13.5549	-0.201356	0.872846	0.148257	0.96813	0.338293	1	-0.100058	0.999338
ENSG00000059758	CDK17	37.1777	-0.491183	0.551319	0.269033	0.94556	0.129988	1	0.30581	0.96916
ENSG00000059769	DNAJC25	15.981	0.128682	0.929801	0.160155	0.966108	-0.24469	1	0.223289	0.999338
ENSG00000059804	SLC2A3	23.3006	0.152841	0.91116	-0.0272313	0.993495	-0.321084	1	0.429845	0.890746
ENSG00000059915	PSD	0.563766	0.0562566	NA	0.0381479	NA	-0.1061	NA	-0.141711	NA
ENSG00000060069	CTDP1	17.0869	-0.122388	0.934665	-0.0903262	0.983655	-0.168161	1	0.350201	0.951545
ENSG00000060138	YBX3	108.969	-0.033338	0.979282	0.266426	0.896952	0.14638	1	0.238739	0.96916
ENSG00000060140	STYK1	2.18235	0.0130097	NA	0.109642	NA	0.149793	1	0.0307128	0.999338
ENSG00000060237	WNK1	124.812	-0.0682698	0.957044	0.110333	0.970778	-0.107685	1	0.00179738	1
ENSG00000060303	RPS17P5	147.655	-0.157072	0.821901	-0.170087	0.942111	-0.138739	1	-0.157182	0.991054
ENSG00000060339	CCAR1	595.341	-0.0817475	0.863625	-0.487828	0.0138856	-0.287223	0.795548	-0.222891	0.730717
ENSG00000060491	OGFR	28.4894	-0.810434	0.173642	-0.0738802	0.986021	-0.137933	1	-0.534612	0.784692
ENSG00000060558	GNA15	0.229262	0	NA	-0.0179602	NA	0	NA	0	NA
ENSG00000060566	CREB3L3	0	NA	NA	NA	NA	NA	NA	NA	NA
ENSG00000060642	PIGV	6.85438	-0.0950733	NA	-0.305688	0.9191	-0.441926	1	-0.352319	0.950798
ENSG00000060656	PTPRU	21.1394	0.677319	0.307432	0.989765	0.111436	0.4485	1	0.76958	0.372613
ENSG00000060688	SNRNP40	47.8358	-0.28133	0.691038	-0.176643	0.951592	-0.378724	1	-0.18872	0.992571
ENSG00000060709	RIMBP2	0	NA	NA	NA	NA	NA	NA	NA	NA
ENSG00000060718	COL11A1	1.18843	-0.133766	NA	0	NA	0	1	0	NA
ENSG00000060749	QSER1	19.7777	0.258285	0.819033	-0.38872	0.855554	-0.768705	0.726404	-0.239246	0.996219
ENSG00000060762	MPC1	311.267	0.309562	0.303001	0.00996745	0.994754	0.278768	1	-0.0475426	0.999338
ENSG00000060971	ACAA1	51.1138	-0.71099	0.160962	0.00342636	0.998716	-0.137248	1	-0.0182679	1
ENSG00000060982	BCAT1	46.9748	0.230925	0.835777	0.015723	0.995493	0.330205	1	0.563947	0.711906
ENSG00000061273	HDAC7	15.6561	0.0146255	0.99259	0.92634	0.170503	0.32243	1	0.40063	0.912181
ENSG00000061337	LZTS1	0.369425	0.0449706	NA	0.0523656	NA	0.0557561	NA	0.0551006	NA
ENSG00000061455	PRDM6	6.27555	-0.0448109	NA	0.517036	0.689392	0.333033	1	0.269592	0.976063
ENSG00000061492	WNT8A	0.910207	0.0890105	NA	0.123005	NA	0.123301	NA	0.123239	NA
ENSG00000061656	SPAG4	1.52231	0.0965111	NA	0.0968371	NA	-0.0517724	1	-0.068169	NA
ENSG00000061676	NCKAP1	216.64	0.0389787	0.970021	0.265422	0.836898	-0.107257	1	0.0716908	0.999338
ENSG00000061794	MRPS35	332.183	0.118693	0.82992	0.108268	0.952617	0.356714	0.820936	-0.05254	0.999338
ENSG00000061918	GUCY1B1	69.6618	0.190399	0.83	0.205905	0.94611	0.120209	1	-0.0246686	1
ENSG00000061936	SFSWAP	181.421	-0.102777	0.893554	-0.0579188	0.983203	0.210026	1	0.173522	0.974828
ENSG00000061938	TNK2	7.44222	0.277764	0.784578	0.339104	0.888504	-0.146678	1	-0.115199	0.999338
ENSG00000061987	MON2	61.1751	-0.417154	0.647225	-0.171582	0.964325	-0.225649	1	0.674436	0.551544
ENSG00000062038	CDH3	9.0379	-0.0311394	0.97958	-0.0727875	0.982945	-0.261818	1	-0.298656	0.909937
ENSG00000062096	ARSF	0	NA	NA	NA	NA	NA	NA	NA	NA
ENSG00000062194	GPBP1	193.48	0.0916545	0.916676	-0.169818	0.94556	0.0428882	1	0.227833	0.948819
ENSG00000062282	DGAT2	5.62161	-0.477319	NA	-0.446331	0.749226	-0.310976	1	-0.586379	0.587721
ENSG00000062370	ZNF112	4.13237	0.026843	NA	-0.105592	NA	-0.172987	1	-0.134638	0.999338
ENSG00000062485	CS	131.371	0.192643	0.718207	0.184424	0.906972	0.31635	1	0.234185	0.897393
ENSG00000062524	LTK	1.86014	0.242428	NA	0.214049	NA	0.120203	1	0.230209	NA
ENSG00000062582	MRPS24	3.45909	0.255203	NA	0.232972	NA	-0.186823	1	-0.0302219	1
ENSG00000062598	ELMO2	35.802	0.0372556	0.980614	-0.602894	0.584382	-0.275736	1	-0.179116	0.999338
ENSG00000062650	WAPL	81.9317	-0.799265	0.100485	-0.100437	0.980642	-0.369995	1	-0.243207	0.979007
ENSG00000062716	VMP1	474.028	0.183719	0.659635	-0.306744	0.492265	0.063708	1	-0.338754	0.416428
ENSG00000062725	APPBP2	85.4316	-0.0551953	0.97313	-0.178929	0.962137	0.0678368	1	-0.207764	0.999338
ENSG00000062822	POLD1	44.6421	-0.569936	0.321836	0.218983	0.948829	-0.117265	1	-0.099342	0.999338
ENSG00000063015	SEZ6	0.0967231	0.0315068	NA	0.02366	NA	0.0263143	NA	0.0256203	NA
ENSG00000063046	EIF4B	65.9397	0.484565	0.220548	-0.14351	0.951952	-0.0439355	1	0.159076	0.992571
ENSG00000063127	SLC6A16	1.64545	0.129098	NA	0.244889	NA	0.163896	1	0.0818187	NA
ENSG00000063169	BICRA	5.86611	-0.2539	NA	0.103665	0.981475	0.557669	1	0.481202	0.81453
ENSG00000063176	SPHK2	7.47359	0.186996	0.885974	0.510863	0.729421	0.2549	1	0.0282895	1
ENSG00000063177	RPL18	1751.87	0.0177229	0.977729	-0.0706282	0.96176	-0.119001	1	0.0410574	0.999338
ENSG00000063180	CA11	18.3034	-0.50068	0.473514	-0.263783	0.93549	-0.75746	0.61614	-0.212211	0.999338
ENSG00000063241	ISOC2	97.8585	-0.135767	0.914078	0.170513	0.960237	0.170064	1	0.156036	0.999338
ENSG00000063244	U2AF2	208.447	-0.791883	0.0146767	-0.0135619	0.994999	0.00854098	1	-0.0976612	0.999338
ENSG00000063245	EPN1	102.363	-0.579783	0.323708	0.383512	0.81672	-0.252647	1	0.180722	0.999338
ENSG00000063322	MED29	103.64	0.0406532	0.968398	-0.231176	0.868827	-0.104348	1	-0.148117	0.993615
ENSG00000063438	AHRR	6.08019	0.147196	NA	0.0206548	0.994754	-0.223204	1	0.125635	0.999338
ENSG00000063515	GSC2	0	NA	NA	NA	NA	NA	NA	NA	NA
ENSG00000063587	ZNF275	13.3674	0.0946992	0.951973	0.246164	0.949766	0.12941	1	0.27681	0.977029
ENSG00000063601	MTMR1	26.6883	-0.33873	0.73148	0.0101316	0.997067	-0.152051	1	0.529006	0.785006
ENSG00000063660	GPC1	7.54616	-0.408552	0.640111	-0.3257	0.895129	-0.490248	1	-0.10063	0.999338
ENSG00000063761	ADCK1	20.7067	0.0603652	0.970593	0.0357408	0.992453	-0.572136	1	-0.275181	0.978167
ENSG00000063854	HAGH	362.227	0.573576	0.0449799	-0.188403	0.898005	-0.265326	1	-0.0929991	0.999338
ENSG00000063978	RNF4	63.4035	0.11634	0.907668	0.097978	0.972276	0.11583	1	0.249508	0.961149
ENSG00000064012	CASP8	23.2809	0.0965544	0.951209	0.118365	0.97735	0.151657	1	-0.313654	0.96916
ENSG00000064042	LIMCH1	36.1917	0.920649	0.0925089	0.282564	0.936114	1.11513	0.131422	0.827732	0.297037
ENSG00000064102	INTS13	157.269	0.0653298	0.960509	0.045099	0.987921	0.32116	1	-0.250311	0.96916
ENSG00000064115	TM7SF3	185.11	-0.516149	0.362063	0.250097	0.921431	-0.216826	1	0.197857	0.993615
ENSG00000064195	DLX3	1.45793	-0.0219922	NA	0.0594547	NA	0.0647918	1	0.015802	NA
ENSG00000064199	SPA17	6.56565	-0.243074	NA	-0.517508	0.713968	0.16255	1	-0.213321	0.999338
ENSG00000064201	TSPAN32	0	NA	NA	NA	NA	NA	NA	NA	NA
ENSG00000064205	WISP2	0.240559	0	NA	-0.0595805	NA	0	NA	0	NA
ENSG00000064218	DMRT3	2.23405	-0.209284	NA	-0.371283	NA	-0.261593	1	0.0842164	0.999338
ENSG00000064225	ST3GAL6	43.2298	0.327181	0.737126	-0.340227	0.891157	-0.263689	1	0.446653	0.866371
ENSG00000064270	ATP2C2	0.232267	-0.0239869	NA	-0.0179602	NA	0	NA	0	NA
ENSG00000064300	NGFR	0.933217	-0.0453079	NA	0.0221715	NA	0.0245184	NA	-0.00995685	NA
ENSG00000064309	CDON	2.60032	0.198488	NA	0.504893	NA	0.177017	1	0.460326	0.651098
ENSG00000064313	TAF2	86.9023	-0.426623	0.623642	0.504308	0.725059	0.0832762	1	0.00118137	1
ENSG00000064393	HIPK2	35.7474	0.906869	0.0731034	-0.0313823	0.992453	0.770058	0.640308	0.761913	0.337954
ENSG00000064419	TNPO3	191.051	0.292879	0.622987	0.0238125	0.992453	-0.0364438	1	-0.450199	0.545153
ENSG00000064489	BORCS8-MEF2B	0.118644	0	NA	0	NA	-0.0291793	NA	0	NA
ENSG00000064490	RFXANK	117.62	0.142317	0.893434	-0.384578	0.772438	-0.204287	1	-0.270758	0.95986
ENSG00000064545	TMEM161A	150.898	0.128213	0.878931	0.146156	0.952617	-0.0422225	1	0.21498	0.966553
ENSG00000064547	LPAR2	8.38808	0.629122	0.36483	0.232246	0.950635	-0.378111	1	0.204774	0.999338
ENSG00000064601	CTSA	10.9886	0.230399	0.845418	-0.053184	0.988432	0.0300803	1	-0.00305461	1
ENSG00000064607	SUGP2	90.9077	-0.197439	0.837529	0.731195	0.243163	0.23821	1	0.296676	0.95061
ENSG00000064651	SLC12A2	69.4868	-0.231111	0.823558	-0.332286	0.87926	0.00596365	1	0.169592	0.999338
ENSG00000064652	SNX24	53.696	-0.0584105	0.966182	-0.287947	0.891684	-0.086398	1	-0.250241	0.971642
ENSG00000064655	EYA2	16.6968	-0.711457	0.136998	-0.00738471	0.997067	-0.222193	1	-0.229377	0.977044
ENSG00000064666	CNN2	6.46854	0.121355	NA	0.256063	0.935666	0.26676	1	0.269834	0.974828
ENSG00000064687	ABCA7	5.21188	-0.0319731	NA	0.0550608	0.987756	-0.108918	1	-0.0880506	0.999338
ENSG00000064692	SNCAIP	4.36673	0.0364326	NA	-0.149583	NA	0.0147648	1	-0.0318399	0.999359
ENSG00000064703	DDX20	36.1037	0.231085	0.83364	-0.197419	0.955882	0.151838	1	0.0278775	1
ENSG00000064726	BTBD1	133.764	-0.858709	0.0331779	-0.238786	0.929709	0.101661	1	-0.00304384	1
ENSG00000064763	FAR2	77.2093	-0.0877576	0.937208	0.0642714	0.984188	0.157593	1	-0.143482	0.999338
ENSG00000064787	BCAS1	0.104464	0.0176334	NA	0.00978658	NA	0.0124409	NA	-0.00212653	NA
ENSG00000064835	POU1F1	0	NA	NA	NA	NA	NA	NA	NA	NA
ENSG00000064886	CHI3L2	0	NA	NA	NA	NA	NA	NA	NA	NA
ENSG00000064932	SBNO2	7.85146	-0.311992	0.757217	0.0470126	0.991795	-0.209333	1	0.147214	0.999338
ENSG00000064933	PMS1	110.087	-0.440925	0.473765	-0.425919	0.715809	-0.263172	1	-0.53166	0.574967
ENSG00000064961	HMG20B	68.5647	-0.452553	0.345275	0.309893	0.825776	0.0800963	1	0.0942034	0.999338
ENSG00000064989	CALCRL	3.36887	-0.0396749	NA	-0.060273	NA	0	1	-0.0384996	0.999338
ENSG00000064995	TAF11	114.114	0.267818	0.581139	0.153034	0.94556	0.129375	1	0.257258	0.877068
ENSG00000064999	ANKS1A	42.2454	0.0830524	0.957716	-0.310977	0.911888	0.0476933	1	0.167566	0.999338
ENSG00000065000	AP3D1	260.353	-0.24914	0.682194	0.161639	0.949766	0.336136	1	0.259929	0.917045
ENSG00000065029	ZNF76	67.2311	0.158064	0.842175	0.318149	0.798762	0.102307	1	-0.251747	0.936019
ENSG00000065054	SLC9A3R2	21.0468	-0.697694	0.257666	-0.285253	0.929822	-0.748087	0.72089	-0.227145	0.999338
ENSG00000065057	NTHL1	130.706	0.231312	0.683746	-0.0341865	0.987945	-0.121671	1	0.320236	0.796237
ENSG00000065060	UHRF1BP1	21.5138	0.452214	0.5615	0.385711	0.839681	0.0339987	1	0.175576	0.999338
ENSG00000065135	GNAI3	263.989	0.259629	0.528388	-0.240074	0.787847	-0.141514	1	-0.218758	0.890746
ENSG00000065150	IPO5	350.886	0.254372	0.677046	-0.00237129	0.998802	-0.0421116	1	0.0155649	1
ENSG00000065154	OAT	263.891	0.243134	0.398055	0.196539	0.772438	0.128553	1	0.12205	0.971884
ENSG00000065183	WDR3	153.234	-0.185246	0.840086	0.0198631	0.993806	-0.0495123	1	-0.0221596	1
ENSG00000065243	PKN2	134.481	0.382106	0.498571	-0.278195	0.855554	-0.0557756	1	-0.00473876	1
ENSG00000065268	WDR18	199.572	-0.372705	0.542918	-0.0669893	0.983812	-0.162687	1	0.0272917	1
ENSG00000065308	TRAM2	12.656	-0.0711994	0.966167	0.0615324	0.987694	-0.270644	1	-0.28113	0.976063
ENSG00000065320	NTN1	12.3931	0.368834	0.70017	-0.378788	0.863945	-0.51446	1	-0.0962877	0.999338
ENSG00000065325	GLP2R	0	NA	NA	NA	NA	NA	NA	NA	NA
ENSG00000065328	MCM10	120.852	-0.00217141	0.997981	0.216355	0.918942	-0.177044	1	0.0163185	1
ENSG00000065357	DGKA	9.2057	-0.17757	0.892963	-0.777403	0.351493	0.108713	1	-0.510362	0.803856
ENSG00000065361	ERBB3	7.24485	0.128627	0.922652	0.183866	0.957424	0.221326	1	-0.24562	0.984566
ENSG00000065371	ROPN1	0.0380819	-0.0101135	NA	0	NA	0	NA	0	NA
ENSG00000065413	ANKRD44	18.6461	0.0551783	0.970978	-0.109834	0.977762	-0.475427	1	-0.79295	0.270175
ENSG00000065427	KARS	112.903	0.0770781	0.937712	-0.110917	0.964599	0.0451278	1	0.0175283	1
ENSG00000065457	ADAT1	23.4611	0.409104	0.626673	0.40864	0.817928	0.379444	1	0.145278	0.999338
ENSG00000065485	PDIA5	81.6144	-0.203333	0.863256	-0.44739	0.789239	-0.773073	0.640308	-0.10031	0.999338
ENSG00000065491	TBC1D22B	34.5114	0.0819411	0.960509	0.480467	0.77242	0.144835	1	0.18099	0.999338
ENSG00000065518	NDUFB4	131.809	0.00412517	0.996857	0.144067	0.935083	0.161342	1	0.258136	0.803856
ENSG00000065526	SPEN	104.754	-0.0205295	0.987922	0.301003	0.867134	0.110636	1	0.212944	0.980997
ENSG00000065534	MYLK	5.38666	0.216326	NA	0.117283	0.96813	0.125985	1	-0.135322	0.999338
ENSG00000065548	ZC3H15	775.555	0.0811771	0.869211	0.103101	0.947361	0.32737	0.633262	0.0568705	0.999338
ENSG00000065559	MAP2K4	66.7336	-0.0419693	0.976106	0.347939	0.837777	0.210937	1	0.191534	0.999338
ENSG00000065600	TMEM206	132.981	0.145964	0.829645	0.00757429	0.996823	-0.45379	0.726404	0.0860387	0.999338
ENSG00000065609	SNAP91	19.2175	0.117897	0.924033	0.0233441	0.993577	0.196598	1	0.0414301	1
ENSG00000065613	SLK	86.1334	-0.104662	0.926468	0.421916	0.719589	-0.138199	1	0.360348	0.869864
ENSG00000065615	CYB5R4	177.733	0.0544601	0.968469	0.617013	0.402963	0.27125	1	0.289244	0.951851
ENSG00000065618	COL17A1	0.701449	-0.0493926	NA	0	NA	0	NA	-0.0603669	NA
ENSG00000065621	GSTO2	10.2222	-0.172532	0.87409	-0.690027	0.319108	-0.359618	1	-0.458069	0.785006
ENSG00000065665	SEC61A2	74.0776	0.0859754	0.952305	-0.21687	0.949766	0.352242	1	-0.277871	0.96916
ENSG00000065675	PRKCQ	14.0985	-0.136171	0.886033	-0.141459	0.958082	-0.44491	1	-0.077574	0.999338
ENSG00000065717	TLE2	14.5152	-0.290106	0.72839	-0.164918	0.958082	-0.139957	1	0.173535	0.999338
ENSG00000065802	ASB1	27.4766	0.303873	0.745331	0.516689	0.692053	0.170898	1	-0.224321	0.993748
ENSG00000065809	FAM107B	27.6618	-0.197153	0.86972	0.296689	0.921552	0.106975	1	0.383051	0.922635
ENSG00000065833	ME1	153.839	-0.249697	0.796726	0.0385187	0.992415	-0.25745	1	-0.285228	0.96916
ENSG00000065882	TBC1D1	38.9116	-0.690583	0.282476	-0.300726	0.920755	-0.00250255	1	0.0409914	1
ENSG00000065883	CDK13	29.0112	-0.399056	0.639619	-0.0992363	0.982865	-0.289979	1	-0.288075	0.96916
ENSG00000065911	MTHFD2	68.6523	0.0887214	0.930743	-0.409013	0.639253	-0.13451	1	-0.147885	0.999338
ENSG00000065923	SLC9A7	6.09048	-0.184806	NA	0.231332	0.950472	0.0185986	1	0.0334915	1
ENSG00000065970	FOXJ2	11.9709	-0.186739	0.886033	-0.523053	0.719589	-1.17559	0.0771011	-0.646933	0.601124
ENSG00000065978	YBX1	512.456	-0.722108	0.148712	0.182885	0.955462	0.0558517	1	0.339211	0.922223
ENSG00000065989	PDE4A	1.85827	0.608768	NA	0.700209	NA	0.438142	0.990327	0.610901	NA
ENSG00000066027	PPP2R5A	45.9525	-0.170565	0.899024	0.134797	0.972276	0.120724	1	0.100808	0.999338
ENSG00000066032	CTNNA2	0.768901	0	NA	0	NA	0	NA	-0.130501	NA
ENSG00000066044	ELAVL1	105.931	-1.06067	0.00342597	-0.217419	0.94556	-0.0565451	1	-0.179839	0.999338
ENSG00000066056	TIE1	0	NA	NA	NA	NA	NA	NA	NA	NA
ENSG00000066084	DIP2B	52.1462	-0.33644	0.732815	-0.0828615	0.98464	-0.0722084	1	-0.423853	0.892091
ENSG00000066117	SMARCD1	78.4665	-0.339784	0.580183	0.262175	0.88745	0.130315	1	0.209387	0.976063
ENSG00000066135	KDM4A	15.375	-0.0816109	0.960509	0.159015	0.966326	0.0458798	1	0.0149755	1
ENSG00000066136	NFYC	83.3546	-0.00616867	0.996517	-0.304308	0.81672	-0.140349	1	-0.0727831	0.999338
ENSG00000066185	ZMYND12	0.290169	0.0867906	NA	0.0791536	NA	0.0818079	NA	0.0811139	NA
ENSG00000066230	SLC9A3	0.215314	0	NA	0	NA	-0.0430527	NA	0	NA
ENSG00000066248	NGEF	4.87363	-0.24681	NA	-0.0614488	0.983655	-0.330769	1	-0.450872	0.569347
ENSG00000066279	ASPM	109.932	0.0523624	0.970021	-0.473633	0.67932	-0.267697	1	-0.514134	0.67316
ENSG00000066294	CD84	0	NA	NA	NA	NA	NA	NA	NA	NA
ENSG00000066322	ELOVL1	99.1989	0.249394	0.561952	-0.0766503	0.96813	-0.212756	1	-0.00621407	1
ENSG00000066336	SPI1	0.403199	0.00414928	NA	-0.025787	NA	0.0176553	NA	-0.0428917	NA
ENSG00000066379	ZNRD1	21.1038	-0.0646293	0.963515	0.267139	0.922264	-0.152678	1	-0.0399175	1
ENSG00000066382	MPPED2	16.6162	-0.219142	0.846753	-0.142848	0.96813	-0.313881	1	-0.1396	0.999338
ENSG00000066405	CLDN18	0.412527	0	NA	-0.0595805	NA	0	NA	-0.0298733	NA
ENSG00000066422	ZBTB11	11.7111	-0.0798985	0.960993	-0.199405	0.956886	0.166922	1	0.0278172	1
ENSG00000066427	ATXN3	29.6241	0.0187511	0.99161	-0.534885	0.694083	0.00824837	1	-0.658302	0.561525
ENSG00000066455	GOLGA5	61.6373	-0.311791	0.688721	-0.44003	0.712499	0.050527	1	0.00221123	1
ENSG00000066468	FGFR2	34.3177	-0.00377586	0.997943	-0.405101	0.839681	-0.339547	1	0.0729004	0.999338
ENSG00000066557	LRRC40	176.366	0.0148976	0.992	-0.502069	0.637544	-0.0487132	1	-0.116447	0.999338
ENSG00000066583	ISOC1	130.334	-0.16157	0.853746	0.177667	0.949766	-0.0939351	1	-0.0589142	0.999338
ENSG00000066629	EML1	43.8084	-0.372982	0.693848	-0.553305	0.67932	-0.172363	1	-0.880905	0.222993
ENSG00000066651	TRMT11	49.8901	0.540203	0.314201	0.183839	0.951592	0.28667	1	0.265117	0.962499
ENSG00000066654	THUMPD1	37.6258	0.586382	0.236727	0.0721115	0.983655	0.308092	1	0.0981778	0.999338
ENSG00000066697	MSANTD3	38.6118	-0.16426	0.878285	0.187929	0.953179	0.413442	1	0.169483	0.999338
ENSG00000066735	KIF26A	3.35596	0.0486766	NA	-0.424791	NA	-0.00131544	1	-0.136152	0.999338
ENSG00000066739	ATG2B	25.3696	0.99514	0.0513734	0.378831	0.85979	0.659878	0.921269	-0.195953	0.999338
ENSG00000066777	ARFGEF1	22.5327	-0.536168	0.401981	-0.419856	0.779793	-0.226119	1	-0.458682	0.800754
ENSG00000066813	ACSM2B	0	NA	NA	NA	NA	NA	NA	NA	NA
ENSG00000066827	ZFAT	5.76023	-0.339702	NA	0.262314	0.901862	0.310081	1	0.222994	0.976063
ENSG00000066855	MTFR1	78.696	-0.261234	0.72323	-0.189573	0.949766	0.230156	1	0.130054	0.999338
ENSG00000066923	STAG3	25.7932	-0.0213415	0.987694	-0.00214614	0.999237	-0.0463855	1	-0.203177	0.992571
ENSG00000066926	FECH	132.629	-0.467012	0.235552	-0.797217	0.013321	-0.285935	1	-0.497666	0.360556
ENSG00000066933	MYO9A	33.201	-0.763286	0.205679	-0.29911	0.922264	-0.0931584	1	-0.259579	0.984302
ENSG00000067048	DDX3Y	0.559301	0.104141	NA	0.0833456	NA	0.123482	NA	0.0544757	NA
ENSG00000067057	PFKP	674.421	0.373778	0.472142	-0.0621476	0.983655	-0.052519	1	-0.186043	0.978286
ENSG00000067064	IDI1	308.31	0.265219	0.640326	-0.692693	0.0465211	0.0630093	1	-0.366335	0.70091
ENSG00000067066	SP100	73.7495	0.495915	0.544724	-0.0757227	0.985824	0.408754	1	0.384153	0.928628
ENSG00000067082	KLF6	48.6945	0.257629	0.683746	0.148707	0.954991	-0.0850474	1	0.0682885	0.999338
ENSG00000067113	PLPP1	36.0451	0.26544	0.78744	0.61072	0.54116	-0.242425	1	0.27492	0.975142
ENSG00000067141	NEO1	85.9683	0.489424	0.416466	-0.0974378	0.977719	-0.524947	0.967213	0.2246	0.979456
ENSG00000067167	TRAM1	320.515	-0.621988	0.00463014	0.0474329	0.983614	0.0343159	1	-0.258577	0.785006
ENSG00000067177	PHKA1	62.4205	-0.508857	0.502903	0.187168	0.958082	0.0311216	1	-0.256856	0.981113
ENSG00000067182	TNFRSF1A	55.8215	-0.0162341	0.989108	-0.223422	0.913045	-0.204598	1	-0.079417	0.999338
ENSG00000067191	CACNB1	9.98056	-0.23539	0.82931	-0.051567	0.988225	0.262741	1	0.458551	0.835211
ENSG00000067208	EVI5	27.4255	-0.338986	0.73148	-0.146419	0.96813	0.185149	1	-0.092532	0.999338
ENSG00000067221	STOML1	18.9606	0.278022	0.791374	0.188307	0.960186	0.110306	1	0.201872	0.999338
ENSG00000067225	PKM	1206.79	0.206257	0.260665	-0.0411934	0.968656	0.112773	1	0.00761496	1
ENSG00000067248	DHX29	91.3335	0.255726	0.702662	0.0991795	0.970778	0.0805768	1	-0.0632379	0.999338
ENSG00000067334	DNTTIP2	240.779	0.0870242	0.917576	-0.253206	0.830438	0.0187461	1	-0.157525	0.986519
ENSG00000067365	METTL22	58.7883	0.47002	0.538607	0.145813	0.966947	-0.145754	1	0.110264	0.999338
ENSG00000067369	TP53BP1	35.998	-0.137646	0.922472	0.257434	0.947238	-0.0888043	1	-0.273695	0.978286
ENSG00000067445	TRO	18.0035	-0.378237	0.686067	-0.799758	0.316426	0.18043	1	-0.822787	0.29659
ENSG00000067533	RRP15	201.68	0.0677961	0.946574	0.173751	0.94556	0.122238	1	-0.0315315	1
ENSG00000067560	RHOA	585.43	0.134926	0.735553	0.185422	0.798968	0.100681	1	0.260223	0.611655
ENSG00000067596	DHX8	76.6303	0.333527	0.71813	-0.283712	0.92384	0.0677617	1	-0.319308	0.960623
ENSG00000067601	PMS2P4	18.256	-0.237794	0.81314	0.0710897	0.985241	-0.425089	1	-0.282769	0.96916
ENSG00000067606	PRKCZ	40.0449	-0.308374	0.760091	-0.0369949	0.992453	-0.0887566	1	0.0544862	0.999338
ENSG00000067646	ZFY	1.20886	0.253063	NA	-0.0516198	NA	0.168401	1	-0.0762294	NA
ENSG00000067704	IARS2	644.383	-0.292981	0.515686	0.299662	0.716743	0.0144325	1	0.20668	0.94202
ENSG00000067715	SYT1	2.80586	-0.124649	NA	-0.0357199	NA	-0.374063	1	-0.0355259	0.999338
ENSG00000067798	NAV3	0.114316	0	NA	-0.0179602	NA	0	NA	-0.0159999	NA
ENSG00000067829	IDH3G	75.4179	0.157842	0.861407	0.166073	0.952617	-0.0796384	1	-0.205247	0.976376
ENSG00000067836	ROGDI	22.598	0.474517	0.458938	0.279246	0.909699	-0.11272	1	-0.00973255	1
ENSG00000067840	PDZD4	1.337	0.117607	NA	0.258853	NA	0.231196	1	0.265422	NA
ENSG00000067842	ATP2B3	0.0380819	-0.0101135	NA	0	NA	0	NA	0	NA
ENSG00000067900	ROCK1	158.204	0.0920869	0.934665	-0.35521	0.781444	0.0532796	1	-0.0541521	0.999338
ENSG00000067955	CBFB	92.6791	-0.137543	0.861413	0.00498061	0.99728	0.488193	0.809663	0.0918308	0.999338
ENSG00000067992	PDK3	112.835	0.164732	0.900045	0.431193	0.810615	0.125847	1	-0.060068	0.999338
ENSG00000068001	HYAL2	17.6868	-0.15774	0.904702	0.0200127	0.994754	0.247297	1	-0.0195903	1
ENSG00000068024	HDAC4	10.44	-0.294456	0.72323	-0.347252	0.838776	-0.0567562	1	-0.141947	0.999338
ENSG00000068028	RASSF1	11.4038	0.174586	0.894106	0.235612	0.949766	0.506021	1	0.520198	0.796237
ENSG00000068078	FGFR3	7.46197	0.289517	0.780127	0.856868	0.241397	0.238509	1	0.23342	0.999338
ENSG00000068079	IFI35	12.9731	0.0151539	0.99259	0.552289	0.67932	0.273366	1	0.157183	0.999338
ENSG00000068097	HEATR6	57.3921	0.336991	0.72323	-0.420506	0.820671	0.0918912	1	-0.225524	0.999338
ENSG00000068120	COASY	74.848	0.396349	0.345275	0.217188	0.890467	-0.00397969	1	0.152008	0.99258
ENSG00000068137	PLEKHH3	16.7232	-0.638769	0.295918	-0.301992	0.913045	-0.301869	1	0.149441	0.999338
ENSG00000068305	MEF2A	52.3909	0.317168	0.71238	-0.0396209	0.992031	0.0200434	1	0.261001	0.974828
ENSG00000068308	OTUD5	71.8096	-0.590511	0.271291	0.0227507	0.993577	-0.203912	1	0.109567	0.999338
ENSG00000068323	TFE3	27.4196	-0.0314085	0.983777	0.109438	0.981342	0.0992084	1	0.417555	0.898198
ENSG00000068354	TBC1D25	12.3181	-0.388403	0.677352	-0.160641	0.965125	0.240127	1	-0.0618363	0.999338
ENSG00000068366	ACSL4	86.3904	0.429441	0.531121	0.230324	0.94519	-0.039694	1	0.368785	0.890746
ENSG00000068383	INPP5A	53.6205	-0.733938	0.207003	-0.183688	0.958082	-0.155505	1	0.396924	0.903783
ENSG00000068394	GPKOW	87.8785	-0.0286095	0.980614	-0.0259254	0.992453	-0.0441774	1	-0.00655717	1
ENSG00000068400	GRIPAP1	110.126	0.22851	0.788937	-0.0690266	0.984188	-0.186606	1	-0.269279	0.962319
ENSG00000068438	FTSJ1	68.9415	-0.119929	0.908364	0.00618566	0.997275	-0.222859	1	-0.267245	0.951851
ENSG00000068489	PRR11	73.1535	0.56246	0.170643	0.0992273	0.968656	-0.103273	1	0.26623	0.929188
ENSG00000068615	REEP1	28.0833	-0.193021	0.861953	-0.123652	0.972276	0.34025	1	0.383097	0.902893
ENSG00000068650	ATP11A	16.7318	-0.384229	0.665237	-0.337268	0.885696	-0.253812	1	0.238783	0.991535
ENSG00000068654	POLR1A	36.7179	0.0742887	0.963356	-0.107246	0.981342	-0.104179	1	0.225512	0.999338
ENSG00000068697	LAPTM4A	973.815	0.292065	0.223979	-0.100269	0.947088	0.00132998	1	-0.00852255	1
ENSG00000068724	TTC7A	13.8929	-1.027	0.0444668	-0.722718	0.429748	-1.09735	0.139456	-0.584579	0.711373
ENSG00000068745	IP6K2	107.825	0.103625	0.896279	0.0173715	0.99327	0.0595093	1	0.281724	0.859856
ENSG00000068781	STON1-GTF2A1L	0.0518699	0	NA	0	NA	0	NA	0	NA
ENSG00000068784	SRBD1	87.4224	-0.425301	0.592935	-0.362162	0.852521	-0.163349	1	-0.465012	0.81685
ENSG00000068796	KIF2A	231.564	0.149259	0.852149	0.193581	0.933624	0.330767	1	0.1651	0.99258
ENSG00000068831	RASGRP2	1.62663	-0.190885	NA	0.023142	NA	0.0270221	1	-0.0109816	NA
ENSG00000068878	PSME4	53.3693	-0.0948402	0.951973	-0.218645	0.953146	-0.359259	1	-0.218503	0.999338
ENSG00000068885	IFT80	14.4134	0.337732	0.72323	-0.249933	0.948131	-0.0195286	1	0.0249289	1
ENSG00000068903	SIRT2	169.807	0.314078	0.542297	0.368681	0.647096	0.313921	1	0.311193	0.833928
ENSG00000068912	ERLEC1	286.464	-0.0054187	0.995078	-0.510127	0.0860401	-0.106905	1	-0.215513	0.890746
ENSG00000068971	PPP2R5B	5.28223	-0.091885	NA	-0.245787	0.943376	0.0124763	1	0.289199	0.966244
ENSG00000068976	PYGM	0.155992	0	NA	0	NA	-0.0291793	NA	0	NA
ENSG00000068985	PAGE1	0.0761638	-0.0239869	NA	0	NA	0	NA	0	NA
ENSG00000069011	PITX1	40.9699	-0.682019	0.177701	-0.000940192	0.999808	0.197552	1	0.0718432	0.999338
ENSG00000069018	TRPC7	0	NA	NA	NA	NA	NA	NA	NA	NA
ENSG00000069020	MAST4	10.4767	-0.115274	0.936367	0.0950267	0.982945	0.0868764	1	-0.277387	0.975625
ENSG00000069122	ADGRF5	1.14368	0.109062	NA	0.139948	NA	0.0322611	1	0.0786372	NA
ENSG00000069188	SDK2	8.18159	0.268478	0.742292	-0.297041	0.878542	-0.109178	1	-0.0649318	0.999338
ENSG00000069206	ADAM7	0	NA	NA	NA	NA	NA	NA	NA	NA
ENSG00000069248	NUP133	361.932	-0.223355	0.64102	-0.318161	0.608921	-0.149187	1	-0.268878	0.813077
ENSG00000069275	NUCKS1	1072.02	-0.167599	0.676868	-0.202044	0.783782	-0.0913068	1	-0.0800648	0.999338
ENSG00000069329	VPS35	358.191	-0.124007	0.882792	-0.0665873	0.982945	-0.0732563	1	-0.208051	0.96916
ENSG00000069345	DNAJA2	233.613	-0.0925013	0.930489	-0.0856332	0.977854	-0.0348195	1	0.0482314	0.999338
ENSG00000069399	BCL3	2.81952	0.141053	NA	-0.211147	NA	0.261653	1	0.301409	0.924256
ENSG00000069424	KCNAB2	10.7472	-0.038592	0.980614	0.825671	0.293731	-0.0590061	1	0.256694	0.98874
ENSG00000069431	ABCC9	0.351937	-0.0611515	NA	0	NA	0	NA	0	NA
ENSG00000069482	GAL	60.1875	0.129687	0.924083	-0.456398	0.779793	-0.283661	1	-0.142703	0.999338
ENSG00000069493	CLEC2D	33.6742	0.45677	0.436923	-0.0453401	0.987756	0.178469	1	0.0840227	0.999338
ENSG00000069509	FUNDC1	185.846	0.112313	0.854098	-8.74382e-05	0.999967	-0.0265575	1	0.118268	0.999338
ENSG00000069535	MAOB	1.88767	0.168691	NA	0.329916	NA	0.314593	1	0.305112	0.685616
ENSG00000069667	RORA	7.99048	0.0296323	0.981825	0.10506	0.974946	-0.1643	1	-0.111717	0.999338
ENSG00000069696	DRD4	0.192578	-0.0239869	NA	0	NA	0	NA	-0.0159999	NA
ENSG00000069702	TGFBR3	29.7548	0.438408	0.604588	0.240981	0.949091	-0.163293	1	-0.348157	0.943666
ENSG00000069764	PLA2G10	0.0672602	0	NA	-0.0179602	NA	0	NA	0	NA
ENSG00000069812	HES2	0.758777	0.134653	NA	0.156646	NA	0.158684	NA	-0.0282918	NA
ENSG00000069849	ATP1B3	68.3781	0.0699957	0.939722	-0.0746714	0.977645	-0.167759	1	-0.231781	0.935021
ENSG00000069869	NEDD4	37.0424	0.477138	0.538925	0.465065	0.768186	0.514296	1	-0.126196	0.999338
ENSG00000069943	PIGB	46.3852	-0.552613	0.42505	0.0654181	0.986574	-0.715044	0.761254	-0.552197	0.712574
ENSG00000069956	MAPK6	34.8121	0.865807	0.0516551	0.460654	0.709467	0.402354	1	0.561752	0.59442
ENSG00000069966	GNB5	48.3323	0.264754	0.780336	-0.161088	0.963662	-0.0604605	1	0.1693	0.999338
ENSG00000069974	RAB27A	41.422	0.170214	0.890699	0.139926	0.96813	-0.354205	1	-0.703788	0.405714
ENSG00000069998	HDHD5	157.233	-0.673804	0.0897428	-0.106555	0.96813	-0.229625	1	-0.203946	0.977044
ENSG00000070010	UFD1	110.459	-0.0800764	0.930489	-0.528249	0.284915	-0.302291	1	-0.371131	0.709539
ENSG00000070018	LRP6	28.1556	0.0150879	0.99259	0.0217701	0.994754	0.0902303	1	-0.493196	0.820901
ENSG00000070019	GUCY2C	0	NA	NA	NA	NA	NA	NA	NA	NA
ENSG00000070031	SCT	0.059322	0	NA	0	NA	-0.0153059	NA	0	NA
ENSG00000070047	PHRF1	20.2783	0.00159329	0.999115	0.403315	0.846498	0.478914	1	0.642286	0.60637
ENSG00000070061	ELP1	143.869	0.447845	0.472134	-0.382308	0.781444	-0.581636	0.82552	-0.0461046	0.999338
ENSG00000070081	NUCB2	605.825	0.154985	0.755148	0.00628527	0.996823	-0.157492	1	-0.309985	0.625047
ENSG00000070087	PFN2	120.556	-0.00134156	0.998882	-0.183765	0.938566	0.126953	1	-0.127559	0.999338
ENSG00000070159	PTPN3	26.8809	0.0362909	0.980614	-0.0228411	0.994754	-0.202771	1	0.0240011	1
ENSG00000070182	SPTB	2.79616	-0.48972	NA	-0.0461446	NA	-0.161541	1	-0.150802	0.999338
ENSG00000070190	DAPP1	0	NA	NA	NA	NA	NA	NA	NA	NA
ENSG00000070193	FGF10	0	NA	NA	NA	NA	NA	NA	NA	NA
ENSG00000070214	SLC44A1	45.413	-0.0362855	0.980614	0.195079	0.957424	0.251501	1	0.541291	0.763781
ENSG00000070269	TMEM260	25.0931	-0.236228	0.82931	-0.556901	0.635771	-0.183525	1	0.0688512	0.999338
ENSG00000070366	SMG6	18.5187	-0.287084	0.766864	0.134125	0.969577	-0.351634	1	-0.0667788	0.999338
ENSG00000070367	EXOC5	33.9039	0.157686	0.899614	-0.656131	0.451003	-0.0878491	1	-0.585008	0.625047
ENSG00000070371	CLTCL1	14.3088	-0.144113	0.867566	-0.329354	0.779793	-0.220173	1	-0.258488	0.937263
ENSG00000070388	FGF22	0.874992	0.0328664	NA	0.0937457	NA	0.0406245	NA	0.124331	NA
ENSG00000070404	FSTL3	3.17349	0.111212	NA	0.146915	NA	0.399959	1	0.166303	0.999338
ENSG00000070413	DGCR2	123.862	0.340256	0.690674	-0.251839	0.93814	0.00573503	1	-0.1885	0.999338
ENSG00000070423	RNF126	123.313	-0.445738	0.321002	-0.227302	0.899463	-0.244391	1	0.102255	0.999338
ENSG00000070444	MNT	47.5281	0.446241	0.494805	-0.196059	0.949912	-0.184187	1	-0.0692909	0.999338
ENSG00000070476	ZXDC	15.7758	-1.49106	0.000188101	-0.903312	0.176598	-0.573573	1	-0.28695	0.975142
ENSG00000070495	JMJD6	82.0818	-0.465189	0.404414	-0.299507	0.861924	-0.615629	0.674537	-0.0571167	0.999338
ENSG00000070501	POLB	209.595	0.114352	0.914078	0.240255	0.914926	0.3993	1	0.426457	0.754733
ENSG00000070526	ST6GALNAC1	0.73729	-0.0203909	NA	-0.134584	NA	-0.0509001	NA	-0.0875007	NA
ENSG00000070540	WIPI1	42.5758	-0.0694701	0.963356	-0.174686	0.959675	0.0433238	1	-0.269388	0.974828
ENSG00000070601	FRMPD1	0.497391	0.040175	NA	0.0976863	NA	0.0994001	NA	0.0806869	NA
ENSG00000070610	GBA2	8.02008	-0.719092	0.247009	-0.577013	0.623493	0.0606779	1	-0.352266	0.943666
ENSG00000070614	NDST1	21.8846	-0.349827	0.714681	0.238241	0.949766	-0.421326	1	0.163593	0.999338
ENSG00000070669	ASNS	1.51798	-0.117243	NA	-0.0428858	NA	-0.0723034	1	-0.0642828	NA
ENSG00000070718	AP3M2	25.4452	-0.0389498	0.980614	0.612295	0.584366	0.487125	1	0.314688	0.96916
ENSG00000070729	CNGB1	0.114816	0.0315068	NA	0.02366	NA	0.0263143	NA	0.0256203	NA
ENSG00000070731	ST6GALNAC2	0.596923	0.031183	NA	0.055782	NA	0.0357185	NA	0.0564447	NA
ENSG00000070748	CHAT	0	NA	NA	NA	NA	NA	NA	NA	NA
ENSG00000070756	PABPC1	82.9975	0.249136	0.718755	0.520237	0.443942	0.362589	1	0.308303	0.891355
ENSG00000070759	TESK2	6.9847	0.123222	NA	-0.177164	0.958082	0.0355563	1	0.0869414	0.999338
ENSG00000070761	CFAP20	104.443	0.0489483	0.954456	0.0953518	0.964325	0.281411	1	0.0295964	0.999338
ENSG00000070770	CSNK2A2	25.3629	0.0247015	0.988857	-0.0924846	0.983655	0.610064	1	0.00541468	1
ENSG00000070778	PTPN21	5.94702	-0.113584	NA	-0.693019	0.428039	-0.1904	1	-0.314644	0.962499
ENSG00000070785	EIF2B3	353.093	0.165522	0.72346	0.348016	0.445493	0.147187	1	0.20852	0.890746
ENSG00000070808	CAMK2A	0	NA	NA	NA	NA	NA	NA	NA	NA
ENSG00000070814	TCOF1	300.171	-0.0354717	0.968469	0.10085	0.961418	-0.119007	1	0.392215	0.474792
ENSG00000070831	CDC42	10.3698	-0.112022	0.939722	-0.0504935	0.988483	0.0778296	1	-0.281464	0.976063
ENSG00000070882	OSBPL3	40.4071	-0.319625	0.751643	0.245104	0.949766	0.158692	1	-0.00821176	1
ENSG00000070886	EPHA8	1.0556	-0.10623	NA	-0.0115563	NA	-0.128613	1	0.0211383	NA
ENSG00000070915	SLC12A3	0.213027	-0.0378603	NA	0	NA	-0.0153059	NA	0	NA
ENSG00000070950	RAD18	56.8902	0.339323	0.723617	0.48603	0.763838	0.785007	0.675566	0.220125	0.999338
ENSG00000070961	ATP2B1	231.574	0.433744	0.334615	0.0264125	0.992453	0.309429	1	0.304857	0.856338
ENSG00000070985	TRPM5	0	NA	NA	NA	NA	NA	NA	NA	NA
ENSG00000071051	NCK2	23.9464	-1.24758	0.00349977	-0.455529	0.779793	-0.453215	1	-0.0221165	1
ENSG00000071054	MAP4K4	238.309	0.0899269	0.947315	0.340014	0.855962	0.157398	1	0.123712	0.999338
ENSG00000071073	MGAT4A	43.6061	0.676353	0.314201	0.0597845	0.987756	0.373609	1	0.206822	0.999338
ENSG00000071082	RPL31	396.541	0.0992358	0.900635	0.0598566	0.982945	-0.10601	1	-0.0195821	1
ENSG00000071127	WDR1	370.671	0.217807	0.777199	0.169772	0.951592	0.0506886	1	-0.137033	0.999338
ENSG00000071189	SNX13	133.988	-0.0210827	0.99056	-0.526163	0.708707	0.360496	1	-0.288197	0.975142
ENSG00000071203	MS4A12	0	NA	NA	NA	NA	NA	NA	NA	NA
ENSG00000071205	ARHGAP10	45.243	0.0592922	0.970021	0.374616	0.857724	0.255542	1	0.211593	0.999338
ENSG00000071242	RPS6KA2	15.6706	0.515884	0.462107	0.304509	0.905462	0.180874	1	0.0125353	1
ENSG00000071243	ING3	199.905	-0.52456	0.130718	-0.0225315	0.992453	-0.0693587	1	-0.333943	0.776198
ENSG00000071246	VASH1	2.97238	-0.22733	NA	0.0484184	NA	0.330401	1	0.117889	0.999338
ENSG00000071282	LMCD1	64.7706	-0.0556033	0.969755	-0.150924	0.964599	-0.542527	1	-0.698164	0.370475
ENSG00000071462	BUD23	405.113	0.814144	0.0212424	0.251531	0.891684	0.237335	1	0.310773	0.890746
ENSG00000071537	SEL1L	48.3159	0.35617	0.711341	-0.545567	0.686798	-0.164734	1	-0.468122	0.845998
ENSG00000071539	TRIP13	439.769	-0.236643	0.594857	-0.547294	0.0683155	-0.423985	0.631012	0.0274233	0.999338
ENSG00000071553	ATP6AP1	206.193	0.0861004	0.934902	-0.0775418	0.981342	-0.140981	1	-0.0954321	0.999338
ENSG00000071564	TCF3	99.4901	-0.155039	0.823558	0.726524	0.04349	0.396843	0.981376	0.425343	0.555506
ENSG00000071575	TRIB2	50.5725	-0.154344	0.891291	-0.100659	0.977936	-0.294213	1	0.0215589	1
ENSG00000071626	DAZAP1	108.929	-1.51301	0.000139755	-0.0223441	0.994754	0.0370025	1	0.210973	0.999338
ENSG00000071655	MBD3	46.6224	-0.616887	0.166963	0.182186	0.951592	-0.0584302	1	0.195978	0.992571
ENSG00000071677	PRLH	0	NA	NA	NA	NA	NA	NA	NA	NA
ENSG00000071794	HLTF	119.501	-0.219273	0.843534	0.064202	0.986574	0.339083	1	0.583246	0.651321
ENSG00000071859	FAM50A	57.3171	-0.849247	0.108781	-0.419736	0.815292	-0.366956	1	-0.233635	0.993
ENSG00000071889	FAM3A	33.663	-0.423523	0.558644	-0.141799	0.966145	-0.29432	1	-0.0176698	1
ENSG00000071894	CPSF1	11.9522	-0.527038	0.487338	0.038182	0.992453	0.264176	1	0.0973017	0.999338
ENSG00000071909	MYO3B	0.142473	0.0176334	NA	0.00978658	NA	0.0124409	NA	-0.0159999	NA
ENSG00000071967	CYBRD1	19.974	0.222776	0.853746	0.139678	0.970778	-0.375459	1	-0.315956	0.96916
ENSG00000071991	CDH19	0	NA	NA	NA	NA	NA	NA	NA	NA
ENSG00000071994	PDCD2	185.833	-0.146368	0.780638	0.0967926	0.960237	0.267835	1	0.235579	0.868471
ENSG00000072041	SLC6A15	72.95	-0.112209	0.931309	-0.213986	0.949766	-0.13338	1	-0.134426	0.999338
ENSG00000072042	RDH11	164.436	0.225442	0.751139	-0.941677	0.00604565	0.028499	1	-0.620847	0.215592
ENSG00000072062	PRKACA	51.9974	0.075401	0.96269	0.0685137	0.986532	0.0859684	1	0.177297	0.999338
ENSG00000072071	ADGRL1	18.3185	-0.705424	0.225982	-0.0227273	0.994754	-0.345584	1	0.0988687	0.999338
ENSG00000072080	SPP2	0	NA	NA	NA	NA	NA	NA	NA	NA
ENSG00000072110	ACTN1	85.7688	0.205256	0.86092	-0.272594	0.935313	0.00491685	1	-0.227213	0.997257
ENSG00000072121	ZFYVE26	18.7451	0.270059	0.771566	-0.0630926	0.986574	0.300192	1	-0.310417	0.956466
ENSG00000072133	RPS6KA6	16.5176	-0.0782438	0.955974	0.0869933	0.982945	-0.246038	1	-0.41941	0.842755
ENSG00000072134	EPN2	31.772	0.240227	0.824052	0.587153	0.586658	0.38416	1	0.445702	0.851616
ENSG00000072135	PTPN18	22.9704	-0.171396	0.891291	0.0699434	0.986532	-0.0838324	1	-0.0230719	1
ENSG00000072163	LIMS2	2.04503	-0.184538	NA	0.222127	NA	0.0113285	1	0.0811988	0.999338
ENSG00000072182	ASIC4	0.145981	0	NA	0	NA	0	NA	-0.0298733	NA
ENSG00000072195	SPEG	8.63555	-0.284575	0.776888	0.315202	0.906446	0.212321	1	0.264232	0.977044
ENSG00000072201	LNX1	15.0586	-0.00252106	0.998618	0.426866	0.825776	-0.549849	1	-0.335774	0.960778
ENSG00000072210	ALDH3A2	267.606	0.0993663	0.900635	0.0522015	0.983916	0.225204	1	-0.404255	0.539651
ENSG00000072274	TFRC	142.133	0.0532714	0.969213	-0.0432087	0.988432	-0.0573794	1	-0.35249	0.890746
ENSG00000072310	SREBF1	18.0607	0.105173	0.93868	0.216711	0.951592	-0.210709	1	-0.0115224	1
ENSG00000072315	TRPC5	0	NA	NA	NA	NA	NA	NA	NA	NA
ENSG00000072364	AFF4	41.9424	0.14799	0.890163	0.307026	0.874203	0.169034	1	0.595221	0.477198
ENSG00000072401	UBE2D1	114.131	-0.40693	0.399578	-0.102659	0.96813	-0.250608	1	-0.0603595	0.999338
ENSG00000072415	MPP5	32.9891	-0.253194	0.824052	-0.348014	0.891157	-0.295396	1	-0.466817	0.851616
ENSG00000072422	RHOBTB1	15.7265	-0.327977	0.743158	0.116491	0.978602	-0.241237	1	-0.431243	0.890746
ENSG00000072501	SMC1A	532.114	0.518644	0.0120952	0.298683	0.490452	0.174411	1	0.247847	0.746363
ENSG00000072506	HSD17B10	307.594	-0.0472316	0.957201	-0.103803	0.959458	0.504072	0.42922	0.0137643	1
ENSG00000072518	MARK2	37.7044	0.400012	0.657206	0.368852	0.868696	0.314584	1	0.586919	0.681999
ENSG00000072571	HMMR	220.529	0.249162	0.689064	-0.426026	0.531731	-0.166197	1	-0.75971	0.0300937
ENSG00000072609	CHFR	62.2315	-0.768577	0.150326	-0.194786	0.95569	-0.273649	1	0.116693	0.999338
ENSG00000072657	TRHDE	0	NA	NA	NA	NA	NA	NA	NA	NA
ENSG00000072682	P4HA2	88.7196	0.433528	0.599315	0.148019	0.966947	-0.215079	1	0.0554384	0.999338
ENSG00000072694	FCGR2B	0.0574082	0.0176334	NA	0.00978658	NA	0.0124409	NA	0.0117469	NA
ENSG00000072736	NFATC3	15.3687	0.218884	0.849754	0.212734	0.952617	0.041718	1	0.24487	0.991054
ENSG00000072756	TRNT1	24.9291	0.00096839	0.999484	0.0230839	0.994448	-0.0495718	1	-0.422936	0.869864
ENSG00000072778	ACADVL	96.5003	-0.255801	0.626355	-0.120543	0.957424	-0.324385	1	-0.239623	0.912181
ENSG00000072786	STK10	22.0397	0.115069	0.938978	0.511154	0.736084	0.193083	1	0.161058	0.999338
ENSG00000072803	FBXW11	50.6128	0.333002	0.717628	0.700748	0.414785	0.261551	1	0.72981	0.394832
ENSG00000072818	ACAP1	3.16087	0.0492287	NA	-0.0302806	NA	-0.282919	1	0.0346053	1
ENSG00000072832	CRMP1	2.36505	0.053026	NA	0.000106485	NA	0.0526479	1	-0.490757	0.607527
ENSG00000072840	EVC	6.71124	0.0088152	NA	-0.041065	0.988432	0.0669427	1	0.184963	0.999338
ENSG00000072849	DERL2	301.858	0.42431	0.016517	0.0774263	0.95569	0.312491	0.606695	0.0847429	0.999338
ENSG00000072858	SIDT1	0.362197	0.0446769	NA	0.00978658	NA	0.0263143	NA	0.0394937	NA
ENSG00000072864	NDE1	27.1196	0.0919182	0.947315	-0.159295	0.963654	-0.485245	1	-0.23844	0.981113
ENSG00000072952	MRVI1	0	NA	NA	NA	NA	NA	NA	NA	NA
ENSG00000072954	TMEM38A	13.0212	-0.109599	0.936367	-0.0801207	0.983916	-0.325644	1	-0.103098	0.999338
ENSG00000072958	AP1M1	114.564	-0.771849	0.101311	0.321692	0.874203	0.246428	1	0.0452573	0.999359
ENSG00000073008	PVR	19.0736	-0.435168	0.622391	-0.0194072	0.994999	0.163895	1	0.196851	0.999338
ENSG00000073050	XRCC1	53.6748	0.0878783	0.951298	0.195732	0.954991	-0.109012	1	0.447858	0.834051
ENSG00000073060	SCARB1	147.201	-0.366164	0.57855	0.0460196	0.987756	0.392015	1	0.513763	0.586348
ENSG00000073067	CYP2W1	0	NA	NA	NA	NA	NA	NA	NA	NA
ENSG00000073111	MCM2	72.4372	-0.62723	0.330761	0.417277	0.815814	-0.170489	1	0.13094	0.999338
ENSG00000073146	MOV10L1	0	NA	NA	NA	NA	NA	NA	NA	NA
ENSG00000073150	PANX2	8.52457	-0.0782654	0.96269	0.400478	0.841472	-0.0301519	1	0.195259	0.999338
ENSG00000073169	SELENOO	37.3721	-1.12126	0.00570342	-0.422397	0.788558	-0.423768	1	0.130754	0.999338
ENSG00000073282	TP63	0	NA	NA	NA	NA	NA	NA	NA	NA
ENSG00000073331	ALPK1	7.10236	0.372424	0.631201	0.055744	0.987145	-0.0565963	1	0.116698	0.999338
ENSG00000073350	LLGL2	22.105	-0.30066	0.769443	0.26051	0.945636	0.198003	1	0.08591	0.999338
ENSG00000073417	PDE8A	49.0106	-0.270022	0.788195	-0.0270424	0.99327	-0.103452	1	0.217798	0.999338
ENSG00000073464	CLCN4	5.6587	0.137847	NA	0.165502	0.94556	0.257112	1	0.103939	0.999338
ENSG00000073536	NLE1	60.5457	0.209249	0.808112	-0.174408	0.952617	0.244835	1	-0.117176	0.999338
ENSG00000073578	SDHA	683.525	0.0932598	0.890163	-0.246418	0.770438	-0.254541	1	0.000274738	1
ENSG00000073584	SMARCE1	8.73417	0.664321	0.32691	0.0955315	0.983614	-0.338612	1	-0.401476	0.912181
ENSG00000073598	FNDC8	0.172	0	NA	0	NA	-0.0153059	NA	-0.0298733	NA
ENSG00000073605	GSDMB	5.57412	0.110554	NA	-0.0138372	0.996467	-0.0325604	1	0.0794996	0.999338
ENSG00000073614	KDM5A	105.231	0.0846757	0.953085	0.11469	0.974523	0.435201	1	0.350544	0.926957
ENSG00000073670	ADAM11	3.5516	0.118764	NA	0.211893	NA	0.00191516	1	0.264903	0.962754
ENSG00000073711	PPP2R3A	8.96824	-0.160428	0.880839	-0.0229571	0.993495	-0.059893	1	0.300993	0.942989
ENSG00000073712	FERMT2	91.4107	0.409179	0.56126	-0.0949843	0.980642	0.524058	1	-0.15582	0.999338
ENSG00000073734	ABCB11	0	NA	NA	NA	NA	NA	NA	NA	NA
ENSG00000073737	DHRS9	0.516606	0.0569252	NA	0.0521219	NA	0.0536002	NA	-0.00230941	NA
ENSG00000073754	CD5L	0	NA	NA	NA	NA	NA	NA	NA	NA
ENSG00000073756	PTGS2	2.91299	-0.0214029	NA	-0.105277	NA	-0.0631822	1	-0.537185	0.656659
ENSG00000073792	IGF2BP2	34.5561	-0.0147013	0.99259	-0.217538	0.949766	-0.445349	1	-0.305206	0.961313
ENSG00000073803	MAP3K13	100.63	0.0784994	0.93215	0.123068	0.958082	0.287001	1	0.576384	0.217236
ENSG00000073849	ST6GAL1	5.6916	-0.734479	NA	-0.132088	0.970778	-0.268911	1	0.232609	0.99258
ENSG00000073861	TBX21	0.415123	0.0582975	NA	0.0526444	NA	0.0545275	NA	0.0543488	NA
ENSG00000073905	VDAC1P1	153.793	0.0153169	0.99056	0.10668	0.96813	-0.0813287	1	0.133733	0.999338
ENSG00000073910	FRY	5.39586	-0.582608	NA	-0.234434	0.918685	-0.270044	1	-0.162216	0.999338
ENSG00000073921	PICALM	113.512	-0.0153578	0.99161	0.114506	0.970778	0.0205737	1	0.435008	0.785006
ENSG00000073969	NSF	95.4983	0.0367789	0.973305	-0.0364343	0.988388	-0.133685	1	-0.0581792	0.999338
ENSG00000074047	GLI2	7.19196	0.0878102	0.954978	0.12598	0.972276	0.0535406	1	0.292368	0.96916
ENSG00000074054	CLASP1	32.5306	0.644301	0.349698	-0.0228426	0.994754	1.20853	0.0543679	0.721078	0.465174
ENSG00000074071	MRPS34	424.224	0.533255	0.0259383	0.0267357	0.988151	-0.0539398	1	0.15621	0.966571
ENSG00000074181	NOTCH3	5.50793	-0.200418	NA	-0.667728	0.473978	0.331573	1	0.0697717	0.999338
ENSG00000074201	CLNS1A	151.952	0.214859	0.703745	0.212542	0.885696	0.164591	1	0.220889	0.936709
ENSG00000074211	PPP2R2C	9.40217	0.0203604	0.988786	0.274687	0.896952	0.230613	1	0.270901	0.96148
ENSG00000074219	TEAD2	76.2306	-0.478	0.340858	-0.0592455	0.985082	-0.208967	1	0.549612	0.466442
ENSG00000074266	EED	25.3978	0.149572	0.893434	0.0744917	0.983916	0.504857	1	0.219338	0.98874
ENSG00000074276	CDHR2	0.111469	0.0176334	NA	0.00978658	NA	0.0124409	NA	0.0117469	NA
ENSG00000074317	SNCB	2.83608	0.00350821	NA	-0.109789	NA	-0.349016	1	-0.190259	0.99258
ENSG00000074319	TSG101	444.242	0.0321311	0.968585	0.196943	0.847592	-0.0176297	1	-0.338898	0.520263
ENSG00000074356	NCBP3	76.9041	0.293538	0.768911	0.118836	0.975644	0.130859	1	-0.0164981	1
ENSG00000074370	ATP2A3	4.7873	0.015919	NA	0.0189492	NA	0.162296	1	0.000721142	1
ENSG00000074410	CA12	14.0722	-0.0781668	0.95989	-0.409364	0.817234	-0.332052	1	-0.219428	0.999338
ENSG00000074416	MGLL	1.89453	0.264176	NA	0.129072	NA	0.208933	1	0.195284	0.961313
ENSG00000074527	NTN4	13.2694	-0.329329	0.6877	-0.401499	0.792793	-0.0981624	1	-0.436642	0.81791
ENSG00000074582	BCS1L	39.5094	0.0561045	0.966639	0.135488	0.964599	0.0771174	1	0.14896	0.999338
ENSG00000074590	NUAK1	13.2658	-0.0315127	0.983595	-0.198186	0.957424	0.162187	1	0.115853	0.999338
ENSG00000074603	DPP8	127.186	-0.0929749	0.935733	0.0669444	0.983916	0.0732627	1	-0.0900569	0.999338
ENSG00000074621	SLC24A1	9.32569	0.650605	0.328684	0.35886	0.877376	0.186386	1	0.578684	0.693333
ENSG00000074657	ZNF532	3.33831	-0.789229	NA	0.19307	NA	0.229322	1	0.263669	0.96916
ENSG00000074660	SCARF1	0.2676	0.0315068	NA	0.00978658	NA	0.0263143	NA	0.0256203	NA
ENSG00000074695	LMAN1	304.824	0.564951	0.136184	-0.0143308	0.994754	0.219835	1	0.30065	0.867222
ENSG00000074696	HACD3	1248.94	0.239219	0.290506	0.115955	0.899463	0.0214822	1	-0.152668	0.875329
ENSG00000074706	IPCEF1	0.675964	0	NA	0	NA	-0.0435225	NA	-0.0862861	NA
ENSG00000074755	ZZEF1	26.6129	0.0561526	0.972605	0.158862	0.965991	-0.261223	1	0.215061	0.999338
ENSG00000074771	NOX3	0	NA	NA	NA	NA	NA	NA	NA	NA
ENSG00000074800	ENO1	1694.75	0.14712	0.525032	0.0575208	0.957424	0.166712	1	-0.0540211	0.999338
ENSG00000074803	SLC12A1	0	NA	NA	NA	NA	NA	NA	NA	NA
ENSG00000074842	MYDGF	560.337	0.119565	0.890163	0.122791	0.960237	-0.074311	1	0.167915	0.98874
ENSG00000074855	ANO8	4.16502	-0.0472311	NA	0.0737428	NA	-0.0340533	1	-0.297945	0.95986
ENSG00000074935	TUBE1	63.1377	0.465248	0.397505	-0.0650411	0.984188	-0.203045	1	0.145304	0.999338
ENSG00000074964	ARHGEF10L	33.4466	-1.04497	0.0299022	-1.09627	0.0420945	-0.669538	0.888283	-0.423636	0.883195
ENSG00000074966	TXK	2.82905	0.124352	NA	-0.226734	NA	-0.32015	1	-0.147289	0.999338
ENSG00000075035	WSCD2	0	NA	NA	NA	NA	NA	NA	NA	NA
ENSG00000075043	KCNQ2	15.6427	-0.731277	0.202946	-0.160539	0.964325	0.0637754	1	0.269496	0.975142
ENSG00000075073	TACR2	0.152328	-0.0517337	NA	0	NA	0	NA	0	NA
ENSG00000075089	ACTR6	221.046	0.151769	0.841305	0.119005	0.962137	0.0756949	1	0.0323877	0.999508
ENSG00000075131	TIPIN	72.3594	-0.0231628	0.982931	0.216702	0.922264	-0.0466981	1	-0.101199	0.999338
ENSG00000075142	SRI	544.436	-0.192933	0.67724	-0.209668	0.827196	0.00384921	1	-0.464311	0.165096
ENSG00000075151	EIF4G3	290.66	0.152828	0.85863	0.0464155	0.987145	0.081194	1	0.382958	0.77778
ENSG00000075188	NUP37	274.96	-0.0786899	0.900635	-0.199817	0.827196	-0.077853	1	-0.156382	0.962479
ENSG00000075213	SEMA3A	30.0033	0.126561	0.930489	-0.365088	0.877376	0.0646948	1	-0.25858	0.986357
ENSG00000075218	GTSE1	191.744	0.041539	0.963279	-0.0265821	0.990212	0.116085	1	-0.0387754	0.999338
ENSG00000075223	SEMA3C	35.4193	0.528455	0.497181	0.1683	0.964325	-0.00150018	1	-0.628528	0.624176
ENSG00000075234	TTC38	90.7915	-0.160602	0.89536	-0.492114	0.704385	-0.230373	1	-0.394046	0.890746
ENSG00000075239	ACAT1	530.452	-0.107573	0.833999	0.25962	0.651033	0.135913	1	0.12476	0.977044
ENSG00000075240	GRAMD4	15.229	-0.546305	0.478506	0.362729	0.879823	-0.0354794	1	0.00205052	1
ENSG00000075275	CELSR1	8.12252	-0.771156	0.159188	-0.613247	0.508374	-0.16935	1	-0.0951519	0.999338
ENSG00000075290	WNT8B	0.196092	0.0176334	NA	0.00978658	NA	0.0124409	NA	-0.0159999	NA
ENSG00000075292	ZNF638	153.79	-0.130011	0.899024	0.106963	0.970778	-0.270933	1	-0.0787687	0.999338
ENSG00000075303	SLC25A40	43.1122	-0.513669	0.43562	-0.271696	0.922264	-0.153818	1	-0.663045	0.43402
ENSG00000075336	TIMM21	147.394	-0.00207738	0.997943	-0.179054	0.928128	-0.0292803	1	-0.272309	0.869718
ENSG00000075340	ADD2	40.1111	-0.0290911	0.985632	0.228494	0.951592	-0.0378256	1	-0.328464	0.962754
ENSG00000075388	FGF4	0	NA	NA	NA	NA	NA	NA	NA	NA
ENSG00000075391	RASAL2	13.7086	-0.968398	0.0589508	-0.22438	0.951592	-0.098131	1	-0.172753	0.999338
ENSG00000075399	VPS9D1	7.19833	-0.0397373	0.980614	0.183943	0.961418	0.210527	1	-0.0150893	1
ENSG00000075407	ZNF37A	24.1545	-0.301819	0.746018	-0.160692	0.964325	-0.116384	1	-0.0209651	1
ENSG00000075413	MARK3	74.9559	-0.250302	0.777437	0.0920931	0.982035	0.451474	1	0.371384	0.890746
ENSG00000075415	SLC25A3	963.9	-0.00505576	0.994319	0.000567634	0.999715	-0.0170436	1	-0.0832992	0.999338
ENSG00000075420	FNDC3B	57.2178	-0.0340378	0.982324	0.400615	0.846617	-0.3998	1	0.181612	0.999338
ENSG00000075426	FOSL2	3.92075	-0.0269343	NA	0.277887	NA	0.0750852	1	0.446932	0.820901
ENSG00000075429	CACNG5	0	NA	NA	NA	NA	NA	NA	NA	NA
ENSG00000075461	CACNG4	0.331256	0	NA	-0.0179602	NA	0	NA	0	NA
ENSG00000075539	FRYL	21.5257	0.22502	0.825571	0.497152	0.67932	0.268491	1	0.262701	0.974828
ENSG00000075568	TMEM131	40.9815	-0.528346	0.5002	-0.351467	0.886293	-0.193465	1	0.193936	0.999338
ENSG00000075618	FSCN1	121.533	0.11604	0.876286	-0.173878	0.928128	0.264585	1	-0.080855	0.999338
ENSG00000075624	ACTB	2064.66	0.330802	0.654364	-0.245586	0.920473	-0.0772826	1	0.044744	0.999338
ENSG00000075643	MOCOS	20.7551	0.18717	0.885191	0.592112	0.623493	0.976372	0.324434	0.117461	0.999338
ENSG00000075651	PLD1	14.829	0.685115	0.259052	0.28734	0.921552	0.112051	1	0.0967674	0.999338
ENSG00000075673	ATP12A	0.575251	0.0275959	NA	0.025629	NA	-0.0157663	NA	-0.0292658	NA
ENSG00000075702	WDR62	50.0151	-0.313053	0.750219	-0.155423	0.966145	-0.100401	1	-0.496949	0.808864
ENSG00000075711	DLG1	50.9867	-0.379659	0.686067	-0.198536	0.957424	-0.557179	1	-0.267631	0.980997
ENSG00000075785	RAB7A	345.084	0.0859612	0.903065	0.11181	0.95569	-0.206647	1	-0.063045	0.999338
ENSG00000075790	BCAP29	193.738	0.474413	0.119554	-0.0684143	0.974523	-0.430004	0.640308	-0.751228	0.00179324
ENSG00000075826	SEC31B	3.29565	0.0462244	NA	0.640584	NA	0.348976	1	0.545715	0.58718
ENSG00000075856	SART3	105.275	0.110752	0.930101	0.118247	0.971961	-0.280887	1	-0.234259	0.979456
ENSG00000075884	ARHGAP15	0	NA	NA	NA	NA	NA	NA	NA	NA
ENSG00000075886	TUBA3D	0.0873376	-0.0101135	NA	0	NA	-0.0153059	NA	0	NA
ENSG00000075891	PAX2	3.86031	0.00680105	NA	-0.0765836	NA	0.0166588	1	0.0195886	1
ENSG00000075914	EXOSC7	192.456	0.0835963	0.923937	0.123572	0.957507	0.264193	1	0.407826	0.589703
ENSG00000075945	KIFAP3	103.219	0.759614	0.0731034	0.30993	0.854319	0.0182887	1	0.011692	1
ENSG00000075975	MKRN2	57.3163	0.271992	0.789792	0.4131	0.825776	0.0286079	1	0.0565774	0.999338
ENSG00000076003	MCM6	563.627	0.241973	0.613243	-0.0566119	0.982865	-0.097306	1	0.00724497	1
ENSG00000076043	REXO2	236.504	0.278417	0.561262	0.0385928	0.986574	0.388345	0.921269	-0.0188654	1
ENSG00000076053	RBM7	16.3518	0.26799	0.799995	-0.0927958	0.983655	0.124772	1	-0.016739	1
ENSG00000076067	RBMS2	5.01842	0.288276	NA	0.259821	0.94556	0.13479	1	0.304977	0.96916
ENSG00000076108	BAZ2A	41.5366	0.259264	0.777437	0.508239	0.663033	0.149797	1	0.206214	0.999338
ENSG00000076201	PTPN23	15.4974	0.0674705	0.966182	0.726953	0.397129	0.14541	1	0.463838	0.843468
ENSG00000076242	MLH1	243.951	0.549626	0.200914	-0.0177073	0.993806	0.176222	1	0.35835	0.81453
ENSG00000076248	UNG	112.039	-0.653837	0.0165041	0.0720141	0.976948	-0.0157681	1	-0.0191126	1
ENSG00000076258	FMO4	9.45532	0.0121639	0.993848	0.113135	0.977719	-0.244436	1	0.103835	0.999338
ENSG00000076321	KLHL20	54.4782	-0.192178	0.86972	-0.0750702	0.985082	0.0187853	1	-0.431708	0.863707
ENSG00000076344	RGS11	0	NA	NA	NA	NA	NA	NA	NA	NA
ENSG00000076351	SLC46A1	11.8753	0.169414	0.89536	-0.13613	0.970778	0.0348271	1	-0.264012	0.979007
ENSG00000076356	PLXNA2	9.25024	0.121021	0.914654	0.0766597	0.983655	-0.345968	1	0.333685	0.904309
ENSG00000076382	SPAG5	100.995	0.195122	0.804083	0.118867	0.965125	0.033253	1	0.0158627	1
ENSG00000076513	ANKRD13A	46.7571	-0.273755	0.784366	0.0883943	0.983655	-0.453861	1	-0.518268	0.77778
ENSG00000076554	TPD52	35.0169	-0.297692	0.667464	0.27865	0.885696	-0.236093	1	0.499155	0.625047
ENSG00000076555	ACACB	10.8177	0.553107	0.400719	0.791919	0.23504	1.00907	0.131422	0.814907	0.206837
ENSG00000076604	TRAF4	71.8749	-0.162043	0.84543	0.171988	0.949766	0.219381	1	0.0920211	0.999338
ENSG00000076641	PAG1	10.7529	0.28652	0.784197	0.826437	0.293731	-0.000583963	1	0.35175	0.951829
ENSG00000076650	GPATCH1	55.4183	0.262542	0.765686	0.214485	0.949766	-0.0849815	1	0.0967852	0.999338
ENSG00000076662	ICAM3	0	NA	NA	NA	NA	NA	NA	NA	NA
ENSG00000076685	NT5C2	46.2648	-0.0109678	0.994904	-0.125727	0.97432	-0.238845	1	0.0723802	0.999338
ENSG00000076706	MCAM	10.482	0.55414	0.468323	-0.253017	0.948634	-0.143704	1	-0.0552649	0.999338
ENSG00000076716	GPC4	27.5792	0.119323	0.936367	-0.222478	0.952617	-0.0729179	1	0.137386	0.999338
ENSG00000076770	MBNL3	10.8211	0.0682879	0.966182	-0.0374614	0.992453	0.213647	1	-0.322306	0.960623
ENSG00000076826	CAMSAP3	7.58281	-0.864966	0.125479	0.200968	0.956806	-0.0773154	1	0.0736119	0.999338
ENSG00000076864	RAP1GAP	3.83497	-0.184757	NA	-0.0170071	NA	0.0604934	1	0.0137711	1
ENSG00000076924	XAB2	33.2597	-0.120777	0.919371	-0.48634	0.658903	0.133678	1	-0.135888	0.999338
ENSG00000076928	ARHGEF1	32.2587	-0.595856	0.391835	-0.273156	0.93814	0.0424871	1	-0.131869	0.999338
ENSG00000076944	STXBP2	43.2482	-0.109139	0.937285	-0.46913	0.739193	-0.186943	1	-0.446668	0.840382
ENSG00000076984	MAP2K7	19.5075	-0.374526	0.655142	0.200575	0.954991	0.0464339	1	0.175909	0.999338
ENSG00000077009	NMRK2	1.58249	-0.280406	NA	-0.0842992	NA	0	1	-0.472062	NA
ENSG00000077044	DGKD	37.6327	0.255955	0.821887	0.253603	0.948634	-0.354394	1	0.121941	0.999338
ENSG00000077063	CTTNBP2	17.0362	0.167349	0.89536	-0.00559641	0.997971	0.258023	1	0.0663942	0.999338
ENSG00000077080	ACTL6B	0.553675	-0.0471343	NA	-0.0725366	NA	0	NA	0	NA
ENSG00000077092	RARB	18.1281	-0.151713	0.893434	0.298814	0.887596	0.091453	1	0.0421793	0.999508
ENSG00000077097	TOP2B	195.205	-0.627162	0.188826	-0.410129	0.72933	-0.299866	1	-0.0988922	0.999338
ENSG00000077147	TM9SF3	373.748	-0.330032	0.459148	-0.00965779	0.995493	-0.0689368	1	-0.207118	0.951851
ENSG00000077150	NFKB2	5.79345	0.173558	NA	-0.157032	0.966326	0.021333	1	0.112072	0.999338
ENSG00000077152	UBE2T	565.517	-0.064727	0.908286	0.050977	0.974946	-0.0614271	1	-0.0956759	0.999338
ENSG00000077157	PPP1R12B	7.11133	-0.274327	0.75151	-0.214917	0.948634	-0.0199263	1	0.218614	0.986867
ENSG00000077232	DNAJC10	313.577	0.458459	0.404414	0.0204839	0.993577	0.223092	1	-0.139126	0.999338
ENSG00000077235	GTF3C1	174.131	0.316015	0.727034	-0.36218	0.852521	0.116057	1	-0.327967	0.95061
ENSG00000077238	IL4R	3.65805	0.563591	NA	0.388186	NA	-0.385387	1	0.317186	0.941346
ENSG00000077254	USP33	160.389	-0.06294	0.96587	-0.0525033	0.987756	0.430414	1	0.231186	0.984018
ENSG00000077264	PAK3	1.91683	-0.195478	NA	-0.154021	NA	-0.0740524	1	-0.320689	0.765287
ENSG00000077274	CAPN6	0.0470557	0	NA	0	NA	0	NA	-0.0159999	NA
ENSG00000077279	DCX	0	NA	NA	NA	NA	NA	NA	NA	NA
ENSG00000077312	SNRPA	348.053	-0.573654	0.0115377	-0.148975	0.921552	-0.0338903	1	0.257639	0.796237
ENSG00000077327	SPAG6	18.3832	0.3774	0.686863	-1.33159	0.00754663	-0.399987	1	-1.03172	0.0877046
ENSG00000077348	EXOSC5	298.006	0.159876	0.872846	0.371546	0.788997	0.328824	1	0.321321	0.912181
ENSG00000077380	DYNC1I2	78.5697	0.173009	0.850831	0.181854	0.950911	-0.14581	1	0.00993478	1
ENSG00000077420	APBB1IP	0.183115	0	NA	0	NA	0	NA	-0.0298733	NA
ENSG00000077454	LRCH4	3.90791	-0.596684	NA	-0.139021	NA	-0.14403	1	-0.009096	1
ENSG00000077458	FAM76B	42.3672	-0.312032	0.752202	-0.423703	0.817928	-0.358913	1	-0.061898	0.999338
ENSG00000077463	SIRT6	33.1422	-1.01127	0.0109339	-0.533051	0.58009	-0.6754	0.681448	-0.132399	0.999338
ENSG00000077498	TYR	0	NA	NA	NA	NA	NA	NA	NA	NA
ENSG00000077514	POLD3	66.7076	0.0644701	0.968655	-0.0304196	0.992453	0.377261	1	0.0782741	0.999338
ENSG00000077522	ACTN2	3.54433	-0.120743	NA	0.0121525	NA	-0.471232	1	-0.248088	0.96916
ENSG00000077549	CAPZB	201.061	-0.480623	0.436964	-0.240099	0.935313	-0.112755	1	-0.0021226	1
ENSG00000077585	GPR137B	33.4728	-0.490349	0.544724	-0.00617317	0.997966	-0.0701521	1	0.418132	0.895325
ENSG00000077616	NAALAD2	27.5325	-0.140305	0.917576	-0.0227673	0.994754	-0.187202	1	-0.211587	0.999338
ENSG00000077684	JADE1	27.3938	-0.0735469	0.963356	-0.139439	0.968143	-0.0912137	1	-0.000416033	1
ENSG00000077713	SLC25A43	0.334816	-0.0141944	NA	0.0128331	NA	-0.00171187	NA	-0.0027885	NA
ENSG00000077721	UBE2A	238.568	0.325738	0.523955	0.0387456	0.987756	-0.12502	1	-0.0692218	0.999338
ENSG00000077782	FGFR1	23.1725	-1.13997	0.0177072	-0.145085	0.96813	-0.208215	1	0.0461329	1
ENSG00000077800	FKBP6	0.486786	-0.0274919	NA	0	NA	-0.194632	NA	-0.0847906	NA
ENSG00000077935	SMC1B	0.257238	0	NA	0	NA	-0.0430527	NA	0	NA
ENSG00000077942	FBLN1	147.297	-0.690326	0.281077	-0.276294	0.936224	-0.283683	1	-0.500895	0.807378
ENSG00000077943	ITGA8	18.0782	-0.806809	0.173642	0.216858	0.952617	0.0630045	1	0.0256195	1
ENSG00000077984	CST7	0	NA	NA	NA	NA	NA	NA	NA	NA
ENSG00000078018	MAP2	20.7164	0.177492	0.885191	0.329576	0.889676	0.00223734	1	-0.110382	0.999338
ENSG00000078043	PIAS2	76.6534	-0.211778	0.843709	-0.066094	0.986532	0.111452	1	-0.241349	0.984018
ENSG00000078053	AMPH	9.39874	-0.0493336	0.963356	-0.19713	0.921552	-0.0449411	1	-0.0399582	0.999338
ENSG00000078061	ARAF	52.3968	0.619826	0.173642	0.221637	0.93356	0.299952	1	0.24179	0.96916
ENSG00000078070	MCCC1	76.6744	-0.0471837	0.977729	-0.0520759	0.988432	-0.266314	1	-0.0542123	0.999338
ENSG00000078081	LAMP3	5.18674	0.128798	NA	-0.0420905	0.988151	0.24161	1	-0.0640969	0.999338
ENSG00000078098	FAP	0	NA	NA	NA	NA	NA	NA	NA	NA
ENSG00000078114	NEBL	11.0835	-0.106281	0.944431	0.325318	0.906972	-0.195904	1	-0.308091	0.96916
ENSG00000078124	ACER3	50.0251	0.363166	0.665603	0.613548	0.501726	0.163862	1	-0.22378	0.992571
ENSG00000078140	UBE2K	210.144	0.517046	0.0446376	-0.0208724	0.992415	0.170784	1	0.105985	0.999338
ENSG00000078142	PIK3C3	226.753	-0.639992	0.108588	-0.752343	0.0781004	-0.656128	0.42922	-0.430279	0.685618
ENSG00000078177	N4BP2	19.9139	-0.226099	0.846804	-0.599109	0.600706	-0.4321	1	-0.257057	0.986519
ENSG00000078237	TIGAR	15.2838	0.132988	0.924038	-0.223507	0.951592	0.537782	1	-0.471894	0.843468
ENSG00000078246	TULP3	70.4482	0.0218928	0.9873	-0.429308	0.710143	-0.068609	1	-0.00416726	1
ENSG00000078269	SYNJ2	29.5652	0.258642	0.808558	-0.061932	0.987637	-0.046897	1	0.0439227	1
ENSG00000078295	ADCY2	2.1671	-0.250627	NA	-0.0586965	NA	0	1	-0.0301864	0.999338
ENSG00000078304	PPP2R5C	95.0172	-0.17301	0.804242	-0.492639	0.380805	0.104139	1	-0.119135	0.999338
ENSG00000078319	PMS2P1	53.2776	0.0476992	0.973992	0.0669355	0.985964	0.100965	1	-0.00584595	1
ENSG00000078328	RBFOX1	3.45125	-0.0956628	NA	0.135239	NA	0.120247	1	-0.0374645	1
ENSG00000078369	GNB1	393.944	-0.234745	0.70671	-0.0838618	0.973324	-0.124671	1	-0.184797	0.976063
ENSG00000078399	HOXA9	46.2126	-0.397456	0.516306	0.170651	0.954991	0.175462	1	0.244417	0.96916
ENSG00000078401	EDN1	0.650499	0.058187	NA	0.0573152	NA	0.043079	NA	0.00121805	NA
ENSG00000078403	MLLT10	54.8141	0.164069	0.901955	0.282495	0.935313	0.0102652	1	0.267486	0.979768
ENSG00000078487	ZCWPW1	11.3716	0.423369	0.625658	-0.00197548	0.999389	0.783311	0.633262	0.0246588	1
ENSG00000078549	ADCYAP1R1	0	NA	NA	NA	NA	NA	NA	NA	NA
ENSG00000078579	FGF20	1.19208	0	NA	-0.248853	NA	-0.17961	1	-0.137745	NA
ENSG00000078589	P2RY10	0	NA	NA	NA	NA	NA	NA	NA	NA
ENSG00000078596	ITM2A	0.088032	-0.0239869	NA	0	NA	0	NA	0	NA
ENSG00000078618	NRDC	450.896	0.441146	0.432503	-0.122958	0.965667	0.351495	1	-0.0321559	1
ENSG00000078668	VDAC3	224.293	-0.30875	0.377741	0.091776	0.962731	0.24708	1	0.079983	0.999338
ENSG00000078674	PCM1	182.924	-0.358892	0.526289	-0.0809204	0.980642	0.26022	1	0.0683084	0.999338
ENSG00000078687	TNRC6C	20.1443	0.526044	0.506003	0.468142	0.787847	0.320624	1	0.605282	0.669251
ENSG00000078699	CBFA2T2	10.1519	-0.380024	0.674785	-0.352379	0.877787	-0.455792	1	-0.322699	0.960623
ENSG00000078725	BRINP1	0	NA	NA	NA	NA	NA	NA	NA	NA
ENSG00000078747	ITCH	90.2707	0.272717	0.775487	0.553213	0.618096	-0.296041	1	0.080744	0.999338
ENSG00000078795	PKD2L2	0.158254	0	NA	-0.0179602	NA	0	NA	-0.0159999	NA
ENSG00000078804	TP53INP2	6.29074	0.487493	NA	0.129238	0.972903	0.757514	0.72692	0.603866	0.664613
ENSG00000078808	SDF4	233.699	0.1332	0.861407	-0.0512892	0.985082	-0.0904702	1	0.194463	0.96916
ENSG00000078814	MYH7B	0.298276	-0.0239869	NA	-0.0179602	NA	0	NA	-0.0298733	NA
ENSG00000078898	BPIFB2	0	NA	NA	NA	NA	NA	NA	NA	NA
ENSG00000078900	TP73	22.518	0.312998	0.756484	1.09307	0.0545647	0.366755	1	0.558265	0.754614
ENSG00000078902	TOLLIP	57.7528	0.454783	0.540134	0.458146	0.748865	0.252737	1	0.0706406	0.999338
ENSG00000078967	UBE2D4	15.3863	0.101932	0.942045	0.218169	0.951592	0.00432097	1	0.259241	0.977944
ENSG00000079101	CLUL1	6.72486	-0.426079	NA	-0.530612	0.479591	-0.327702	1	-0.340283	0.881652
ENSG00000079102	RUNX1T1	6.96712	-0.28332	NA	0.239492	0.938566	-0.206666	1	-0.0882409	0.999338
ENSG00000079112	CDH17	0	NA	NA	NA	NA	NA	NA	NA	NA
ENSG00000079134	THOC1	202.906	0.0665043	0.960204	-0.0508299	0.987694	-0.10575	1	-0.289593	0.945628
ENSG00000079150	FKBP7	44.5729	-0.0773742	0.951563	-0.775644	0.135722	-0.453523	1	-0.153486	0.999338
ENSG00000079156	OSBPL6	67.3982	0.371138	0.677352	0.323598	0.89692	0.426364	1	0.280224	0.974828
ENSG00000079215	SLC1A3	31.5061	0.16283	0.903065	-0.39721	0.847592	-0.328036	1	-0.226784	0.999338
ENSG00000079246	XRCC5	3327.32	0.120992	0.666579	-0.185897	0.584366	0.132125	1	0.0429363	0.999338
ENSG00000079257	LXN	44.5557	-0.179103	0.880239	-0.0481224	0.988432	0.280928	1	0.137553	0.999338
ENSG00000079263	SP140	1.32593	0	NA	0	NA	-0.134547	1	0	NA
ENSG00000079277	MKNK1	80.1713	-0.393578	0.50314	-0.221926	0.929234	-0.18164	1	-0.334653	0.877068
ENSG00000079308	TNS1	2.47136	-0.19655	NA	-0.216974	NA	-0.079047	1	-0.364681	0.796067
ENSG00000079313	REXO1	7.89142	-0.344692	0.712032	-0.165468	0.964325	0.206788	1	-0.0170571	1
ENSG00000079332	SAR1A	164.263	0.0452338	0.963998	-0.0138521	0.994754	0.0659448	1	0.195222	0.96916
ENSG00000079335	CDC14A	6.57854	0.329384	NA	-0.310242	0.900382	0.378054	1	-0.604319	0.59742
ENSG00000079337	RAPGEF3	1.12976	0.0334055	NA	-0.033028	NA	-0.342498	1	-0.0246199	NA
ENSG00000079385	CEACAM1	0	NA	NA	NA	NA	NA	NA	NA	NA
ENSG00000079387	SENP1	55.8178	0.0010992	0.999308	0.221285	0.950472	-0.0430862	1	-0.188693	0.999338
ENSG00000079393	DUSP13	0.861166	0.00856988	NA	-0.203998	NA	0.0605058	NA	0.0253796	NA
ENSG00000079432	CIC	13.9084	-0.0478987	0.977008	-0.19802	0.957424	0.0862754	1	0.00963153	1
ENSG00000079435	LIPE	1.39908	-0.0896636	NA	0.0744236	NA	0.0728901	1	-0.228432	NA
ENSG00000079459	FDFT1	1011.01	-0.455025	0.014016	-0.318394	0.309742	-0.0636686	1	-0.329095	0.277104
ENSG00000079462	PAFAH1B3	169.771	-0.18148	0.82364	-0.0206138	0.99327	-0.164921	1	-0.0525047	0.999338
ENSG00000079482	OPHN1	8.15011	0.288969	0.714874	0.00792583	0.997067	-0.125356	1	0.21782	0.981113
ENSG00000079557	AFM	0	NA	NA	NA	NA	NA	NA	NA	NA
ENSG00000079616	KIF22	137.472	0.334927	0.57855	-0.136807	0.958082	-0.410058	1	-0.286921	0.911056
ENSG00000079689	SCGN	0.262489	0	NA	0	NA	0	NA	-0.0576202	NA
ENSG00000079691	CARMIL1	42.1342	0.195812	0.875938	0.158037	0.966108	0.301811	1	-0.190336	0.999338
ENSG00000079739	PGM1	242.74	0.619176	0.196975	0.165557	0.95569	0.0249663	1	0.0575776	0.999338
ENSG00000079785	DDX1	845.885	-0.1019	0.824888	-0.304935	0.394039	0.175914	1	-0.272186	0.564622
ENSG00000079805	DNM2	160.699	-0.59637	0.269758	0.0132203	0.995756	-0.0106996	1	-0.35983	0.890746
ENSG00000079819	EPB41L2	276.037	0.257379	0.757217	0.266197	0.911888	0.0985976	1	-0.0297783	1
ENSG00000079841	RIMS1	1.35916	0.244953	NA	0.241111	NA	0.210946	1	0.242085	NA
ENSG00000079931	MOXD1	85.966	-0.294858	0.652281	-0.494021	0.47881	-0.219279	1	-0.0188735	1
ENSG00000079950	STX7	262.088	-0.234938	0.528363	-0.28572	0.59612	-0.217425	1	-0.0153787	1
ENSG00000079974	RABL2B	32.5415	0.160224	0.89619	-0.132662	0.968656	-0.0426962	1	0.240162	0.987771
ENSG00000079999	KEAP1	88.5901	-0.132545	0.881203	-0.119101	0.964599	0.0324844	1	-0.08093	0.999338
ENSG00000080007	DDX43	0	NA	NA	NA	NA	NA	NA	NA	NA
ENSG00000080031	PTPRH	0.667966	0	NA	-0.173231	NA	0	NA	-0.0710996	NA
ENSG00000080166	DCT	15.1482	0.774688	0.191173	0.0790218	0.985082	0.117315	1	0.137195	0.999338
ENSG00000080189	SLC35C2	52.252	0.0182651	0.99056	0.11154	0.974049	0.14811	1	-0.191869	0.999338
ENSG00000080200	CRYBG3	6.37583	-0.224977	NA	-0.0221002	0.99327	0.0397429	1	-0.342982	0.890746
ENSG00000080224	EPHA6	9.25841	0.328395	0.707287	0.261527	0.930375	0.404259	1	0.230616	0.98874
ENSG00000080293	SCTR	0.143486	0	NA	0	NA	0	NA	-0.0298733	NA
ENSG00000080298	RFX3	5.77301	-0.208176	NA	-0.471165	0.619116	-0.433515	1	-0.373832	0.845998
ENSG00000080345	RIF1	78.7238	0.172495	0.87287	0.279071	0.910102	0.0534047	1	0.566004	0.586217
ENSG00000080371	RAB21	47.3942	-0.369172	0.605953	0.0961754	0.979147	-0.0131393	1	0.201119	0.993922
ENSG00000080493	SLC4A4	14.8591	0.0333777	0.980614	-0.0111729	0.996823	-0.130076	1	0.215887	0.99258
ENSG00000080503	SMARCA2	55.3704	0.0931477	0.953393	-0.13351	0.972276	0.173468	1	0.253647	0.990651
ENSG00000080511	RDH8	0	NA	NA	NA	NA	NA	NA	NA	NA
ENSG00000080546	SESN1	144.473	-0.21505	0.774247	-0.275759	0.865632	-0.0288265	1	-0.11769	0.999338
ENSG00000080561	MID2	9.25471	-0.469899	0.415627	0.114296	0.96813	0.0629126	1	-0.417929	0.785006
ENSG00000080572	PIH1D3	0.266573	-0.083623	NA	0	NA	0	NA	0	NA
ENSG00000080573	COL5A3	0.113137	-0.0239869	NA	0	NA	0	NA	0	NA
ENSG00000080603	SRCAP	6.41605	-0.0885426	NA	0.276508	0.935313	-0.0127978	1	-0.0631148	0.999338
ENSG00000080608	PUM3	48.1407	-0.181317	0.841359	0.42729	0.710669	0.0307705	1	0.209198	0.984018
ENSG00000080618	CPB2	0.202303	-0.0378603	NA	0	NA	0	NA	0	NA
ENSG00000080644	CHRNA3	1.15253	-0.164694	NA	-0.328428	NA	-0.0780866	1	0	NA
ENSG00000080709	KCNN2	0.0518699	0	NA	0	NA	0	NA	0	NA
ENSG00000080802	CNOT4	47.3247	-0.134642	0.912616	-0.32077	0.880974	-0.270591	1	-0.16936	0.999338
ENSG00000080815	PSEN1	98.2433	0.442093	0.503445	-0.55399	0.507924	0.106203	1	-0.750418	0.202412
ENSG00000080819	CPOX	42.8931	-0.401791	0.523955	0.0209348	0.993806	0.00762319	1	0.0519324	0.999338
ENSG00000080822	CLDND1	106.021	0.399915	0.374265	0.0390975	0.987756	-0.0824783	1	0.0686094	0.999338
ENSG00000080823	MOK	18.6186	-0.418359	0.647225	0.0346173	0.992453	-0.246538	1	-0.623342	0.639448
ENSG00000080824	HSP90AA1	1588.69	0.0800843	0.898108	-0.287607	0.583322	0.133289	1	-0.377741	0.327695
ENSG00000080839	RBL1	40.1766	0.137158	0.922652	-0.573608	0.649075	-0.345421	1	0.156141	0.999338
ENSG00000080845	DLGAP4	25.0313	-0.0899791	0.953606	0.0935368	0.983614	-0.802302	0.613303	-0.35011	0.943666
ENSG00000080854	IGSF9B	1.82121	0.137847	NA	0.00880159	NA	0.039113	1	0.062208	NA
ENSG00000080910	CFHR2	0	NA	NA	NA	NA	NA	NA	NA	NA
ENSG00000080947	CROCCP3	1.67146	0.219241	NA	0.386961	NA	0.229857	1	0.278102	NA
ENSG00000080986	NDC80	465.849	-0.151555	0.823438	-0.461733	0.36235	0.148683	1	-0.271433	0.866371
ENSG00000081014	AP4E1	8.57312	-0.210559	0.852564	-0.0889291	0.983655	-0.486234	1	0.126462	0.999338
ENSG00000081019	RSBN1	14.3898	0.391764	0.675448	0.157685	0.966326	0.0451447	1	0.390132	0.924256
ENSG00000081026	MAGI3	17.7116	0.511759	0.524243	0.402366	0.846617	0.524698	1	0.71821	0.474792
ENSG00000081041	CXCL2	1.70419	0.375668	NA	-0.262798	NA	0.227737	1	0.190897	NA
ENSG00000081051	AFP	0	NA	NA	NA	NA	NA	NA	NA	NA
ENSG00000081052	COL4A4	17.9897	0.387224	0.676666	0.210457	0.954991	-0.369705	1	-0.391067	0.920168
ENSG00000081059	TCF7	46.6369	-0.34281	0.674785	-0.693291	0.331984	-0.298068	1	-0.325721	0.937263
ENSG00000081087	OSTM1	168.016	-0.131826	0.853468	-0.0535389	0.983812	0.138594	1	-0.0056876	1
ENSG00000081138	CDH7	36.7468	0.233883	0.837253	-0.332517	0.896897	0.152087	1	-0.390287	0.917029
ENSG00000081148	IMPG2	0.0527428	0	NA	0	NA	0	NA	0	NA
ENSG00000081154	PCNP	216.318	0.315442	0.406024	0.0107643	0.994754	-0.00268103	1	0.00950176	1
ENSG00000081177	EXD2	43.1911	0.0733869	0.96269	-0.635833	0.48795	-0.102198	1	-0.505699	0.776198
ENSG00000081181	ARG2	66.6737	0.0389089	0.97958	-0.625455	0.479591	-0.057404	1	-0.513833	0.747515
ENSG00000081189	MEF2C	31.4514	0.316816	0.753591	-0.0746847	0.985964	0.0545333	1	-0.13761	0.999338
ENSG00000081237	PTPRC	0	NA	NA	NA	NA	NA	NA	NA	NA
ENSG00000081248	CACNA1S	0	NA	NA	NA	NA	NA	NA	NA	NA
ENSG00000081277	PKP1	0	NA	NA	NA	NA	NA	NA	NA	NA
ENSG00000081307	UBA5	73.5466	-0.205375	0.824675	0.349365	0.82958	0.131131	1	-0.0247411	1
ENSG00000081320	STK17B	27.0461	0.693407	0.225331	0.527441	0.658903	0.700401	0.76272	0.504707	0.772556
ENSG00000081377	CDC14B	11.4473	-0.167973	0.899614	-0.0114654	0.996823	0.0375718	1	0.227302	0.999338
ENSG00000081386	ZNF510	12.0036	0.721727	0.258577	0.340391	0.896507	-0.559275	1	-0.1122	0.999338
ENSG00000081479	LRP2	16.2122	0.383317	0.674785	0.124042	0.97413	0.111709	1	0.232577	0.996011
ENSG00000081665	ZNF506	4.45934	0.826224	NA	0.735115	NA	0.593317	0.984461	0.541506	0.735886
ENSG00000081692	JMJD4	11.0715	-0.0763357	0.963091	0.136676	0.970778	-0.0638045	1	0.215684	0.999338
ENSG00000081721	DUSP12	89.6583	0.238284	0.704694	0.0353892	0.988432	-0.361351	1	0.360895	0.776198
ENSG00000081760	AACS	32.2816	-0.757418	0.220548	-0.442833	0.808608	0.409326	1	-0.464988	0.851817
ENSG00000081791	KIAA0141	90.4088	0.533625	0.295118	0.24245	0.915045	0.0505257	1	0.0344675	1
ENSG00000081800	SLC13A1	0	NA	NA	NA	NA	NA	NA	NA	NA
ENSG00000081803	CADPS2	50.1404	-0.165127	0.902398	-0.546462	0.693494	-0.294179	1	0.0200034	1
ENSG00000081818	PCDHB4	0	NA	NA	NA	NA	NA	NA	NA	NA
ENSG00000081842	PCDHA6	0	NA	NA	NA	NA	NA	NA	NA	NA
ENSG00000081853	PCDHGA2	0.167377	0	NA	0	NA	0	NA	0	NA
ENSG00000081870	HSPB11	542.188	0.0438915	0.957716	0.204034	0.849284	0.0770176	1	-0.0301564	0.999338
ENSG00000081913	PHLPP1	21.6916	-0.0433239	0.979074	0.0330365	0.992453	0.414426	1	0.723171	0.468291
ENSG00000081923	ATP8B1	4.42534	-0.225212	NA	0.0112926	NA	0.142261	1	-0.0432796	0.999338
ENSG00000081985	IL12RB2	1.39287	0.00986565	NA	-0.0886092	NA	0.00928675	1	0.00923066	NA
ENSG00000082014	SMARCD3	31.5126	-0.801786	0.0716064	-0.215799	0.948829	-0.473683	1	0.234712	0.981001
ENSG00000082068	WDR70	155.244	-0.0580787	0.951209	-0.515436	0.250485	-0.484164	0.639871	-0.320212	0.785006
ENSG00000082074	FYB1	0	NA	NA	NA	NA	NA	NA	NA	NA
ENSG00000082126	MPP4	0.0527428	0	NA	0	NA	0	NA	0	NA
ENSG00000082146	STRADB	23.5477	0.558061	0.392892	0.0611405	0.986574	0.052035	1	0.270878	0.974828
ENSG00000082153	BZW1	178.974	0.250561	0.597506	-0.295451	0.69902	0.132323	1	-0.0931876	0.999338
ENSG00000082175	PGR	4.6749	-0.181312	NA	0.555729	NA	0.213091	1	0.0888361	0.999338
ENSG00000082196	C1QTNF3	0.459511	0.0636867	NA	0.0213712	NA	0.0284579	NA	-0.0593256	NA
ENSG00000082212	ME2	54.7582	0.349443	0.650846	-0.290609	0.892011	-0.0414933	1	0.12045	0.999338
ENSG00000082213	C5orf22	112.617	-0.276495	0.765686	-0.537874	0.623493	-0.530543	1	0.119402	0.999338
ENSG00000082258	CCNT2	51.6829	0.364102	0.659635	0.74687	0.296054	0.070827	1	0.263825	0.974828
ENSG00000082269	FAM135A	58.2594	0.430118	0.631991	0.286822	0.933355	0.275782	1	0.542696	0.77242
ENSG00000082293	COL19A1	16.4605	0.724726	0.238835	0.436748	0.808476	0.204648	1	0.406257	0.903312
ENSG00000082397	EPB41L3	130.883	-0.0639366	0.962513	0.276325	0.896507	0.481041	1	0.25021	0.96916
ENSG00000082438	COBLL1	20.0214	-0.597372	0.406024	-0.202541	0.957424	-0.170884	1	-0.183688	0.999338
ENSG00000082458	DLG3	76.0505	0.0385049	0.977008	0.202941	0.948333	0.248895	1	0.127702	0.999338
ENSG00000082482	KCNK2	2.30306	-0.0434108	NA	-0.334085	NA	0.0820716	1	0.123457	0.999338
ENSG00000082497	SERTAD4	39.0097	-0.0675308	0.958819	-0.038066	0.991922	-0.162072	1	0.390795	0.844974
ENSG00000082512	TRAF5	11.9826	-0.927283	0.0866793	0.180892	0.962465	-0.51564	1	-0.208144	0.999338
ENSG00000082515	MRPL22	634.267	0.229348	0.655587	0.101074	0.962731	0.0677547	1	-0.0241077	1
ENSG00000082516	GEMIN5	54.9924	0.207289	0.850831	0.1336	0.96813	0.593933	0.972535	-0.185611	0.999338
ENSG00000082556	OPRK1	0.0380819	-0.0101135	NA	0	NA	0	NA	0	NA
ENSG00000082641	NFE2L1	94.2155	0.0364681	0.975321	0.0637941	0.983812	-0.148629	1	0.238421	0.96148
ENSG00000082684	SEMA5B	3.11186	-0.0222676	NA	0.108425	NA	-0.0550546	1	-0.247909	0.945628
ENSG00000082701	GSK3B	23.3223	-0.387295	0.674785	0.218917	0.952617	0.272529	1	-0.20422	0.999338
ENSG00000082781	ITGB5	51.2792	-0.738383	0.223589	-0.171392	0.964325	-0.496092	1	0.804476	0.315541
ENSG00000082805	ERC1	46.0978	0.000103558	1	-0.0978188	0.983486	-0.175782	1	-0.378835	0.929188
ENSG00000082898	XPO1	401.351	-0.350624	0.42457	-0.172099	0.935313	-0.327408	1	-0.136407	0.999338
ENSG00000082929	LINC01587	0	NA	NA	NA	NA	NA	NA	NA	NA
ENSG00000082996	RNF13	57.2795	0.131298	0.922652	0.128934	0.972276	0.405492	1	0.0347925	1
ENSG00000083067	TRPM3	0.9345	0.150139	NA	-0.127216	NA	0.0755143	NA	-0.149185	NA
ENSG00000083093	PALB2	30.035	0.763793	0.217875	0.586679	0.628382	0.0490307	1	0.167511	0.999338
ENSG00000083097	DOPEY1	17.9528	0.36342	0.66153	0.131345	0.96813	-0.112305	1	0.10499	0.999338
ENSG00000083099	LYRM2	145.362	0.498753	0.0328959	0.284635	0.618449	0.300165	0.976362	0.109087	0.999338
ENSG00000083123	BCKDHB	114.999	0.0730799	0.943555	0.0981981	0.969577	0.246418	1	-0.0502589	0.999338
ENSG00000083168	KAT6A	24.349	0.0913494	0.951652	0.139364	0.96813	-0.0803028	1	-0.0944839	0.999338
ENSG00000083223	ZCCHC6	30.7139	-0.173147	0.896279	-0.0743571	0.985964	-0.303342	1	-0.430449	0.890746
ENSG00000083290	ULK2	120.446	-0.796375	0.0165041	-0.592021	0.278357	-0.552034	0.683152	-0.558769	0.340702
ENSG00000083307	GRHL2	0	NA	NA	NA	NA	NA	NA	NA	NA
ENSG00000083312	TNPO1	59.245	0.158347	0.85529	-0.43893	0.588349	-0.0307982	1	-0.143583	0.999338
ENSG00000083444	PLOD1	214.101	-0.0511143	0.963356	0.00721806	0.996823	0.0959278	1	-0.162131	0.993615
ENSG00000083454	P2RX5	1.68518	0.518273	NA	0.409444	NA	0.319648	1	0.50918	NA
ENSG00000083457	ITGAE	715.206	-0.163435	0.72346	0.222191	0.793448	0.185338	1	0.228769	0.844974
ENSG00000083520	DIS3	77.7897	-0.0676085	0.967619	-0.018992	0.995179	-0.0389907	1	0.0390173	1
ENSG00000083535	PIBF1	75.0941	-0.129872	0.921956	0.0564047	0.987756	-0.52285	1	-0.465037	0.820901
ENSG00000083544	TDRD3	60.1553	-0.14376	0.914078	0.340062	0.885696	-0.100456	1	0.161093	0.999338
ENSG00000083622	AC000061.1	0	NA	NA	NA	NA	NA	NA	NA	NA
ENSG00000083635	NUFIP1	3.61911	-0.161973	NA	-0.0828552	NA	-0.0170225	1	-0.127443	0.999338
ENSG00000083642	PDS5B	71.122	-0.186383	0.876302	-0.409101	0.817928	-0.291107	1	-0.342412	0.94202
ENSG00000083720	OXCT1	185.796	0.108731	0.929334	-0.736594	0.223847	-0.412169	1	-0.433081	0.800754
ENSG00000083750	RRAGB	23.6856	-0.0468315	0.977729	-0.0361888	0.992453	0.232569	1	-0.359233	0.945628
ENSG00000083782	EPYC	0.235278	0	NA	0	NA	0	NA	-0.0714936	NA
ENSG00000083799	CYLD	43.8823	-0.259107	0.789792	0.0465281	0.989229	-0.259514	1	-0.45323	0.833928
ENSG00000083807	SLC27A5	26.808	0.000130214	1	0.0132253	0.996467	-0.369919	1	0.133325	0.999338
ENSG00000083812	ZNF324	11.7184	-0.206295	0.863449	0.124301	0.974523	-0.379215	1	-0.513181	0.791425
ENSG00000083814	ZNF671	1.90916	0.00431706	NA	0.125246	NA	-0.170874	1	-0.216811	0.974828
ENSG00000083817	ZNF416	3.77947	-0.696338	NA	0.0428111	NA	-0.397031	1	-0.623219	0.58718
ENSG00000083828	ZNF586	8.84629	0.0454961	0.977729	-0.122118	0.973628	0.247585	1	0.350542	0.937263
ENSG00000083838	ZNF446	3.37316	-0.245155	NA	-0.0280664	NA	0.258642	1	0.117455	0.999338
ENSG00000083844	ZNF264	7.77834	0.032617	0.982931	1.19615	0.0211849	0.320543	1	0.430356	0.890746
ENSG00000083845	RPS5	1112.04	-0.146819	0.632121	0.0543589	0.966326	0.0839712	1	-0.00145075	1
ENSG00000083857	FAT1	18.3593	0.581389	0.408534	0.0826752	0.984188	0.321335	1	-0.0960205	0.999338
ENSG00000083896	YTHDC1	117.88	-0.077461	0.938715	0.283671	0.835973	-0.0969467	1	0.0888886	0.999338
ENSG00000083937	CHMP2B	218.663	-0.00743656	0.991957	0.330368	0.391514	0.0796645	1	-0.0560765	0.999338
ENSG00000084070	SMAP2	66.6438	-0.188814	0.880487	0.310135	0.91484	0.0476119	1	0.116525	0.999338
ENSG00000084072	PPIE	375.326	-0.026861	0.973305	0.0295306	0.987756	0.260355	1	0.2153	0.881652
ENSG00000084073	ZMPSTE24	323.6	-0.129168	0.880564	-0.315676	0.788558	0.0217734	1	-0.528945	0.359774
ENSG00000084090	STARD7	188.837	-0.477489	0.225552	0.100143	0.966947	-0.0389975	1	0.390434	0.680301
ENSG00000084092	NOA1	59.299	-0.578117	0.169404	-0.288037	0.851571	-0.110696	1	0.0654885	0.999338
ENSG00000084093	REST	23.592	-0.10448	0.944518	0.0753868	0.985241	0.513296	1	-0.0487198	0.999508
ENSG00000084110	HAL	0.526968	0	NA	-0.0167203	NA	0	NA	0	NA
ENSG00000084112	SSH1	16.3847	-0.777418	0.196117	-0.631298	0.554687	-0.579919	1	-0.983447	0.117208
ENSG00000084207	GSTP1	1207.35	0.0742271	0.906996	-0.0436923	0.983655	-0.0322664	1	0.121309	0.986519
ENSG00000084234	APLP2	693.395	0.307163	0.39723	0.276043	0.695151	0.409929	0.640308	0.228549	0.869718
ENSG00000084444	FAM234B	25.4338	0.420999	0.645652	0.387153	0.855962	0.0490212	1	0.289815	0.975142
ENSG00000084453	SLCO1A2	0.13489	-0.0101135	NA	0.00978658	NA	0.0124409	NA	0.0117469	NA
ENSG00000084463	WBP11	79.1766	0.414145	0.353764	0.163126	0.948829	0.373242	1	0.251008	0.927028
ENSG00000084623	EIF3I	729.556	0.0752507	0.891291	-0.00961654	0.994754	-0.038496	1	0.120055	0.976063
ENSG00000084628	NKAIN1	1.70994	0.229849	NA	0.14239	NA	0.246263	1	0.213359	NA
ENSG00000084636	COL16A1	0.227091	0.0176334	NA	0.02366	NA	0.0263143	NA	0.0117469	NA
ENSG00000084652	TXLNA	73.7671	0.219714	0.806819	0.0662833	0.985082	-0.0626819	1	0.218383	0.984018
ENSG00000084674	APOB	0	NA	NA	NA	NA	NA	NA	NA	NA
ENSG00000084676	NCOA1	52.3014	0.213968	0.854633	-0.0563958	0.987756	0.110679	1	0.0481383	0.999508
ENSG00000084693	AGBL5	99.5489	-0.0449928	0.959253	0.159311	0.935313	0.0174171	1	0.534462	0.160544
ENSG00000084710	EFR3B	7.98284	-0.081477	0.951209	0.142852	0.964325	-0.677562	0.640308	0.00963672	1
ENSG00000084731	KIF3C	11.9244	-0.343364	0.72346	0.281167	0.937041	-0.0166263	1	0.385759	0.926957
ENSG00000084733	RAB10	194.192	0.0825614	0.933385	0.156085	0.951592	-0.0295656	1	0.101703	0.999338
ENSG00000084734	GCKR	0.0574082	0.0176334	NA	0.00978658	NA	0.0124409	NA	0.0117469	NA
ENSG00000084754	HADHA	37.5418	0.417211	0.566033	-0.213684	0.949766	-0.0143817	1	0.385431	0.881652
ENSG00000084764	MAPRE3	57.1211	0.203218	0.842175	0.399501	0.798968	0.141317	1	0.165725	0.999338
ENSG00000084774	CAD	28.4032	0.31385	0.735037	0.115921	0.974946	0.321843	1	0.0917647	0.999338
ENSG00000085063	CD59	53.9126	0.465602	0.324508	-0.0656022	0.983655	-0.333026	1	-0.380734	0.754747
ENSG00000085117	CD82	4.91924	0.0841123	NA	0.418454	0.6569	0.360245	1	0.282037	0.929188
ENSG00000085185	BCORL1	16.1656	0.119759	0.934902	0.0934898	0.983655	-0.0351132	1	-0.337622	0.956768
ENSG00000085224	ATRX	211.461	0.463372	0.319016	0.240222	0.891169	0.00713383	1	0.438229	0.624176
ENSG00000085231	AK6	96.1778	0.246665	0.604421	0.297037	0.71506	0.191474	1	0.297917	0.784692
ENSG00000085265	FCN1	0	NA	NA	NA	NA	NA	NA	NA	NA
ENSG00000085274	MYNN	25.1253	-0.355681	0.702662	-0.0759006	0.985082	-0.0563273	1	-0.0462545	1
ENSG00000085276	MECOM	32.232	0.324812	0.740831	0.135873	0.970778	0.340373	1	0.0159914	1
ENSG00000085365	SCAMP1	44.5791	-0.227012	0.82364	-0.485816	0.69902	-0.023385	1	-0.365039	0.911056
ENSG00000085377	PREP	68.6227	-0.34251	0.724064	0.748359	0.394039	0.258901	1	0.488644	0.833928
ENSG00000085382	HACE1	47.5798	-0.404917	0.659743	0.187573	0.960237	-0.376091	1	-0.595322	0.683554
ENSG00000085415	SEH1L	107.001	-0.511215	0.481358	-0.0949518	0.982945	0.114579	1	0.208387	0.999338
ENSG00000085433	WDR47	19.0299	-0.435325	0.627553	-0.63228	0.558535	-0.622619	0.984461	-0.710526	0.485728
ENSG00000085449	WDFY1	74.5879	0.155329	0.903656	-0.0309882	0.992453	0.106046	1	-0.140714	0.999338
ENSG00000085465	OVGP1	3.55879	0.353376	NA	0.60568	NA	0.449013	1	0.132116	0.999338
ENSG00000085491	SLC25A24	102.881	-0.163037	0.892192	-0.0705697	0.985082	0.0526488	1	-0.0785001	0.999338
ENSG00000085511	MAP3K4	28.9397	0.236796	0.838503	0.0995036	0.982945	0.15954	1	0.255678	0.98874
ENSG00000085514	PILRA	1.21498	-0.126804	NA	0.085003	NA	-0.185465	1	-0.216606	NA
ENSG00000085552	IGSF9	0.39387	0	NA	-0.0318336	NA	0	NA	0	NA
ENSG00000085563	ABCB1	95.7808	0.477688	0.408912	-0.567388	0.441572	-0.018127	1	-0.52106	0.579935
ENSG00000085644	ZNF213	6.60892	0.0656958	NA	-0.0811571	0.985082	-0.425055	1	0.321826	0.963177
ENSG00000085662	AKR1B1	115.52	0.137752	0.878194	-0.191452	0.94519	-0.227009	1	-0.223597	0.96916
ENSG00000085719	CPNE3	292.123	-0.0137217	0.99161	0.443747	0.621884	0.17678	1	0.238592	0.968092
ENSG00000085721	RRN3	54.8719	0.388702	0.557997	-0.0548429	0.986574	0.071501	1	-0.0646199	0.999338
ENSG00000085733	CTTN	249.81	0.022055	0.980614	0.274563	0.75757	0.188877	1	0.249167	0.869718
ENSG00000085741	WNT11	3.7918	0.242862	NA	0.378969	NA	0.280106	1	0.284524	0.951347
ENSG00000085760	MTIF2	97.2479	0.060702	0.957716	-0.0249586	0.992453	-0.109173	1	-0.231941	0.962754
ENSG00000085788	DDHD2	47.7908	-1.28147	0.00157931	0.303953	0.91244	-0.373985	1	-0.0590204	0.999338
ENSG00000085831	TTC39A	70.5847	-0.0474599	0.977729	-0.157705	0.966326	-0.215309	1	0.0401633	1
ENSG00000085832	EPS15	151.939	0.13015	0.917576	-0.0471033	0.988432	-0.197587	1	-0.300376	0.962319
ENSG00000085840	ORC1	64.6003	0.119588	0.922694	0.461901	0.719589	0.352492	1	0.171875	0.999338
ENSG00000085871	MGST2	188.758	-0.0877008	0.913045	0.184251	0.91739	-0.358369	0.997483	-0.820974	0.00174274
ENSG00000085872	CHERP	101.319	0.208682	0.837977	0.928577	0.0781004	0.607384	0.89537	0.599334	0.547327
ENSG00000085978	ATG16L1	41.2688	0.46012	0.595474	0.0788632	0.985082	0.0553272	1	-0.212953	0.999338
ENSG00000085982	USP40	42.8342	-0.198866	0.875341	-0.140109	0.970778	-0.261145	1	-0.147083	0.999338
ENSG00000085998	POMGNT1	49.5848	0.061918	0.957716	0.100668	0.971396	0.0161834	1	0.24018	0.962754
ENSG00000085999	RAD54L	70.7734	-0.372747	0.592617	-0.308159	0.865102	-0.308423	1	-0.268878	0.962356
ENSG00000086015	MAST2	26.5306	-0.632929	0.359263	-0.266333	0.94556	-0.325772	1	0.154836	0.999338
ENSG00000086061	DNAJA1	232.028	0.0312932	0.977729	-0.186065	0.942111	0.0757322	1	-0.0939456	0.999338
ENSG00000086062	B4GALT1	28.7016	0.0900095	0.955808	-0.0743642	0.985964	-0.384295	1	-0.157552	0.999338
ENSG00000086065	CHMP5	117.555	0.318131	0.518508	0.0645172	0.982865	-0.0721617	1	0.198691	0.96916
ENSG00000086102	NFX1	62.9205	0.298046	0.766557	0.494252	0.745444	0.383347	1	0.221667	0.999338
ENSG00000086159	AQP6	0	NA	NA	NA	NA	NA	NA	NA	NA
ENSG00000086189	DIMT1	205.591	0.0529374	0.963216	0.222017	0.913045	0.05312	1	0.250462	0.94202
ENSG00000086200	IPO11	101.816	-0.217217	0.843564	0.151091	0.965667	0.340826	1	0.148287	0.999338
ENSG00000086205	FOLH1	8.06339	-0.0154415	0.987922	-0.320598	0.708707	-0.194542	1	-0.375679	0.637398
ENSG00000086232	EIF2AK1	93.6846	0.0135617	0.989529	0.0299316	0.989604	-0.0115088	1	0.471329	0.388899
ENSG00000086288	NME8	0	NA	NA	NA	NA	NA	NA	NA	NA
ENSG00000086289	EPDR1	22.7334	0.436771	0.605953	-0.409012	0.825776	-0.541678	1	-0.386466	0.912181
ENSG00000086300	SNX10	59.2056	0.0505607	0.969697	-0.118967	0.96813	0.019753	1	0.31269	0.924214
ENSG00000086475	SEPHS1	58.6961	-0.332192	0.643928	-0.129389	0.965618	-0.219423	1	-0.00829326	1
ENSG00000086504	MRPL28	171.243	0.684357	0.0312775	0.736967	0.0405545	0.0432669	1	0.270998	0.892091
ENSG00000086506	HBQ1	7.59582	-0.108487	0.94212	0.790278	0.309742	0.0128858	1	0.43499	0.877068
ENSG00000086544	ITPKC	8.76236	-0.587367	0.419278	-0.160928	0.965125	-0.059054	1	0.000231809	1
ENSG00000086548	CEACAM6	0.0470557	0	NA	0	NA	0	NA	-0.0159999	NA
ENSG00000086570	FAT2	0	NA	NA	NA	NA	NA	NA	NA	NA
ENSG00000086589	RBM22	91.1899	0.0951205	0.934665	0.171001	0.953284	0.0790906	1	0.165803	0.999338
ENSG00000086598	TMED2	531.706	-0.0381937	0.95989	-0.078718	0.964325	-0.11166	1	-0.154258	0.96148
ENSG00000086619	ERO1B	38.0434	0.174278	0.891291	0.474463	0.763375	0.43929	1	0.512372	0.785006
ENSG00000086666	ZFAND6	171.366	-0.0548953	0.927647	0.142879	0.907859	-0.200617	1	-0.136475	0.968092
ENSG00000086696	HSD17B2	0	NA	NA	NA	NA	NA	NA	NA	NA
ENSG00000086712	TXLNG	291.496	0.323517	0.46751	0.3529	0.610544	0.245131	1	0.523119	0.216762
ENSG00000086717	PPEF1	0.107684	0.0176334	NA	0.00978658	NA	-0.00143249	NA	0.0117469	NA
ENSG00000086730	LAT2	0.837795	0.0187976	NA	-0.0422202	NA	0.0556243	NA	-0.0642953	NA
ENSG00000086758	HUWE1	116.316	0.249117	0.794438	0.263783	0.930114	0.106651	1	0.485375	0.783417
ENSG00000086827	ZW10	79.5172	0.118035	0.926284	0.0883037	0.982945	0.410348	1	0.476632	0.785006
ENSG00000086848	ALG9	4.20094	0.0530231	NA	-0.129743	NA	-0.061195	1	-0.291565	0.96916
ENSG00000086967	MYBPC2	0	NA	NA	NA	NA	NA	NA	NA	NA
ENSG00000086991	NOX4	0	NA	NA	NA	NA	NA	NA	NA	NA
ENSG00000087008	ACOX3	22.0726	0.143964	0.89663	0.248675	0.922813	-0.00266014	1	0.109723	0.999338
ENSG00000087053	MTMR2	120.268	0.0890088	0.937285	-0.191407	0.948634	0.0940167	1	0.16392	0.999338
ENSG00000087074	PPP1R15A	38.6137	-0.422219	0.455383	-0.107813	0.970778	-0.720751	0.343799	-0.244332	0.96916
ENSG00000087076	HSD17B14	5.61638	0.109121	NA	-0.0408752	0.988432	-0.049138	1	0.0812747	0.999338
ENSG00000087077	TRIP6	121.322	0.0484729	0.961617	0.129103	0.95569	0.0343888	1	-0.516357	0.24752
ENSG00000087085	ACHE	0.74952	0.0142077	NA	0.0132434	NA	0.0135366	NA	-0.0960262	NA
ENSG00000087086	FTL	820.915	-0.121102	0.572818	-0.243359	0.157421	-0.267223	0.204836	-0.29349	0.0356119
ENSG00000087087	SRRT	131.513	0.337513	0.498859	0.17733	0.939024	0.148974	1	-0.127026	0.999338
ENSG00000087088	BAX	274.853	-0.0919846	0.943458	-0.433038	0.742315	-0.0228517	1	-0.352986	0.90647
ENSG00000087095	NLK	33.9242	-0.214236	0.861953	-0.343136	0.895129	-0.0461238	1	-0.152393	0.999338
ENSG00000087111	PIGS	269.296	-0.0286431	0.977577	-0.099522	0.964599	-0.318799	1	-0.2079	0.951851
ENSG00000087116	ADAMTS2	5.54902	-0.294486	NA	0.158339	0.95569	0.104975	1	0.016377	1
ENSG00000087128	TMPRSS11E	0	NA	NA	NA	NA	NA	NA	NA	NA
ENSG00000087152	ATXN7L3	11.2347	-0.547666	0.477393	-0.0172065	0.995179	-0.627234	0.982004	-0.330531	0.962499
ENSG00000087157	PGS1	85.779	-0.0567725	0.971085	0.0399069	0.992415	-0.0847918	1	0.0567619	0.999338
ENSG00000087191	PSMC5	400.629	0.0733657	0.892192	-0.0710088	0.964325	-0.110324	1	-0.169737	0.904309
ENSG00000087206	UIMC1	97.6124	0.28313	0.772449	-0.000257803	0.999967	-0.0151505	1	-0.0050079	1
ENSG00000087237	CETP	0	NA	NA	NA	NA	NA	NA	NA	NA
ENSG00000087245	MMP2	8.63696	0.347408	0.686067	0.0753443	0.984798	0.28654	1	-0.165411	0.999338
ENSG00000087250	MT3	0.293302	0	NA	-0.0595805	NA	0	NA	0	NA
ENSG00000087253	LPCAT2	42.3288	0.760245	0.179544	0.066322	0.986574	0.386075	1	0.148167	0.999338
ENSG00000087258	GNAO1	0.483959	0.0328672	NA	-0.00775515	NA	-0.00433616	NA	-0.0342498	NA
ENSG00000087263	OGFOD1	55.5217	0.0489921	0.969742	0.0536138	0.986574	0.195189	1	0.186222	0.999338
ENSG00000087266	SH3BP2	20.2504	0.0509305	0.975864	-0.206238	0.95569	-0.0627633	1	-0.24807	0.992571
ENSG00000087269	NOP14	70.3871	-0.278359	0.714681	0.274997	0.893445	0.507983	0.976362	0.382435	0.843468
ENSG00000087274	ADD1	115.03	-0.140509	0.907911	0.053009	0.987756	-0.198563	1	0.0367104	1
ENSG00000087299	L2HGDH	39.3301	0.315689	0.752628	-0.317558	0.913045	0.0985196	1	-0.347288	0.951851
ENSG00000087301	TXNDC16	99.8076	0.544268	0.404414	-0.157679	0.964325	-0.162756	1	-0.367374	0.910652
ENSG00000087302	RTRAF	288.047	-0.0655669	0.891869	-0.466889	0.0118004	0.095235	1	-0.579048	0.000163276
ENSG00000087303	NID2	23.7556	0.311686	0.741873	0.0556074	0.987756	-0.433151	1	-0.260486	0.977044
ENSG00000087338	GMCL1	31.6356	-0.0222048	0.987922	-0.0817734	0.983655	-0.381328	1	0.215963	0.99258
ENSG00000087365	SF3B2	236.51	0.0860182	0.914302	0.15691	0.94556	0.0201739	1	0.305837	0.792296
ENSG00000087448	KLHL42	24.4338	-0.205922	0.863256	-0.0902192	0.983655	0.123942	1	0.0258661	1
ENSG00000087460	GNAS	998.275	-0.313716	0.147088	0.10729	0.935313	0.0330096	1	0.216807	0.730717
ENSG00000087470	DNM1L	209.919	0.242997	0.639619	0.386497	0.503814	0.0253334	1	0.0964911	0.999338
ENSG00000087494	PTHLH	6.57562	0.309849	NA	0.158225	0.965667	-0.23007	1	-0.726697	0.449762
ENSG00000087495	PHACTR3	8.35642	-0.175463	0.850783	-0.330384	0.825776	0.0444387	1	-0.11519	0.999338
ENSG00000087502	ERGIC2	452.795	0.344108	0.360278	-0.0542928	0.982945	0.161338	1	-0.201826	0.934469
ENSG00000087510	TFAP2C	10.4895	0.0225837	0.989916	0.112722	0.980642	-0.287002	1	-0.38373	0.927959
ENSG00000087586	AURKA	84.7846	0.209868	0.770692	0.104243	0.96813	0.352329	1	0.0829198	0.999338
ENSG00000087589	CASS4	0.439649	0.059226	NA	-0.0145891	NA	0.0424107	NA	0.0368943	NA
ENSG00000087842	PIR	134.469	-0.297332	0.647986	-0.525381	0.414165	-0.561149	0.692833	-0.712011	0.110951
ENSG00000087884	AAMDC	67.182	0.0181673	0.989497	0.282995	0.885696	0.201236	1	0.0585414	0.999338
ENSG00000087903	RFX2	6.21956	-0.143855	NA	0.141653	0.964325	0.167767	1	0.116768	0.999338
ENSG00000087995	METTL2A	265.902	0.247921	0.650846	0.0356006	0.987756	0.127879	1	-0.184458	0.96916
ENSG00000088002	SULT2B1	4.74229	-0.334504	NA	0.0316616	NA	-0.383344	1	0.25296	0.976376
ENSG00000088035	ALG6	208.693	0.183536	0.844459	-0.192031	0.949766	-0.00520518	1	0.356716	0.872649
ENSG00000088038	CNOT3	47.5907	-0.068613	0.957349	0.293643	0.879823	0.379179	1	0.329653	0.909937
ENSG00000088053	GP6	0	NA	NA	NA	NA	NA	NA	NA	NA
ENSG00000088179	PTPN4	12.1192	0.128111	0.928503	-0.235226	0.949766	0.0407278	1	0.282194	0.976063
ENSG00000088205	DDX18	203.798	0.0256488	0.977729	0.291869	0.708707	0.341088	0.983232	0.414275	0.409581
ENSG00000088247	KHSRP	216.687	-0.456489	0.162013	0.263589	0.793448	0.221514	1	0.352361	0.649863
ENSG00000088256	GNA11	25.7171	0.414627	0.598524	0.0336237	0.992453	0.0448883	1	0.361336	0.920765
ENSG00000088280	ASAP3	4.5172	-0.167647	NA	-0.159972	NA	-0.17073	1	0.118338	0.999338
ENSG00000088298	EDEM2	51.6602	0.361501	0.683746	-0.0875072	0.983655	-0.417827	1	-0.139766	0.999338
ENSG00000088305	DNMT3B	14.8955	-0.72409	0.240217	-0.507835	0.724353	-1.11785	0.105431	-0.287858	0.974828
ENSG00000088320	REM1	0	NA	NA	NA	NA	NA	NA	NA	NA
ENSG00000088325	TPX2	386.974	0.0775056	0.930489	-0.152687	0.948829	-0.0643381	1	-0.169412	0.977044
ENSG00000088340	FER1L4	0.412224	0.0077045	NA	0.0727682	NA	0.0521327	NA	0.0762628	NA
ENSG00000088356	PDRG1	58.222	0.129296	0.914654	0.0953335	0.981841	0.0344504	1	0.27431	0.96916
ENSG00000088367	EPB41L1	27.4801	-1.05175	0.0359973	-0.0525544	0.988432	-0.324042	1	0.206146	0.999338
ENSG00000088386	SLC15A1	2.54345	-0.174529	NA	0.0621334	NA	0.0357227	1	-0.0220236	1
ENSG00000088387	DOCK9	9.67743	-0.254849	0.768905	-0.110062	0.972276	-0.0775551	1	-0.0264642	1
ENSG00000088448	ANKRD10	70.5146	0.392097	0.493677	0.50621	0.493061	-0.015504	1	0.369041	0.820901
ENSG00000088451	TGDS	58.295	0.0179809	0.99161	-0.252079	0.94556	0.0509897	1	0.537872	0.755995
ENSG00000088538	DOCK3	23.3351	0.0723397	0.96587	0.691485	0.471565	0.354636	1	-0.125444	0.999338
ENSG00000088543	C3orf18	0.753005	0.0511422	NA	0.0325366	NA	0.118202	NA	-0.0783429	NA
ENSG00000088682	COQ9	133.097	-0.297943	0.720144	-0.359601	0.82958	-0.301461	1	-0.634155	0.436196
ENSG00000088726	TMEM40	9.21629	0.213082	0.75768	0.0479169	0.986574	0.161821	1	-0.192005	0.976063
ENSG00000088727	KIF9	31.0813	-0.244653	0.819033	-0.181553	0.959386	-0.0786183	1	0.258679	0.979768
ENSG00000088756	ARHGAP28	20.5593	0.764328	0.184895	-0.0644012	0.986574	0.458775	1	0.352633	0.938735
ENSG00000088766	CRLS1	154.017	-0.00743835	0.994267	0.0175229	0.993495	-0.00131264	1	0.0875561	0.999338
ENSG00000088782	DEFB127	0	NA	NA	NA	NA	NA	NA	NA	NA
ENSG00000088808	PPP1R13B	11.6225	0.155803	0.907526	0.146304	0.96813	0.306554	1	0.0615814	0.999338
ENSG00000088812	ATRN	45.4061	-0.323885	0.744832	0.455823	0.795661	0.365743	1	0.146193	0.999338
ENSG00000088826	SMOX	12.2809	-0.349265	0.714681	-0.151671	0.966947	-0.0851171	1	-0.369052	0.931968
ENSG00000088827	SIGLEC1	0.173286	0	NA	0	NA	-0.0569261	NA	0	NA
ENSG00000088832	FKBP1A	224.531	-0.291794	0.592219	0.0753691	0.977645	-0.0563516	1	0.00468081	1
ENSG00000088833	NSFL1C	81.6165	0.087361	0.918074	-0.311466	0.739193	-0.364225	1	-0.0716521	0.999338
ENSG00000088836	SLC4A11	3.993	0.233037	NA	0.0920876	NA	0.103323	1	0.323855	0.940536
ENSG00000088854	C20orf194	54.1601	-0.433467	0.540134	0.0610633	0.986574	-0.478413	1	-0.142584	0.999338
ENSG00000088876	ZNF343	6.04778	0.104822	NA	0.254611	0.94556	0.0336726	1	0.112693	0.999338
ENSG00000088881	EBF4	15.463	-0.347856	0.720287	0.239869	0.949766	-0.0961787	1	-0.370638	0.937263
ENSG00000088882	CPXM1	1.1043	-0.2917	NA	0.0962127	NA	0.0994697	1	0.0987059	NA
ENSG00000088888	MAVS	64.1646	0.495312	0.363412	0.512244	0.534291	0.208468	1	-0.0485696	0.999338
ENSG00000088899	LZTS3	4.78706	-0.0205453	NA	0.0840198	NA	0.126507	1	0.205825	0.999338
ENSG00000088926	F11	0	NA	NA	NA	NA	NA	NA	NA	NA
ENSG00000088930	XRN2	445.268	0.0958151	0.89619	-0.0169941	0.992453	-0.145468	1	0.0504073	0.999338
ENSG00000088970	KIZ	50.4653	-0.202026	0.863256	-0.025583	0.993577	-0.515494	1	0.0666218	0.999338
ENSG00000088986	DYNLL1	656.666	-0.0222079	0.973305	-0.285488	0.445493	-0.0342089	1	-0.0955164	0.997602
ENSG00000088992	TESC	15.4265	0.0778073	0.960322	0.774069	0.293731	0.694963	0.795027	0.848362	0.198955
ENSG00000089006	SNX5	67.681	-0.225374	0.739566	0.0967943	0.970778	-0.0100045	1	-0.119834	0.999338
ENSG00000089009	RPL6	496.113	0.0664559	0.949377	0.0765096	0.979147	0.0692663	1	0.0373605	0.999338
ENSG00000089012	SIRPG	0.0601398	0	NA	-0.0179602	NA	0	NA	0	NA
ENSG00000089022	MAPKAPK5	150.87	-0.693046	0.130718	-0.213017	0.94556	0.281479	1	0.0693813	0.999338
ENSG00000089041	P2RX7	0.198152	-0.0101135	NA	0	NA	-0.0291793	NA	-0.0159999	NA
ENSG00000089048	ESF1	53.1536	-0.0502253	0.970021	0.394098	0.787847	0.0993351	1	0.331026	0.920676
ENSG00000089050	RBBP9	19.393	0.0544143	0.973733	0.0431321	0.992177	0.0412153	1	-0.21009	0.999338
ENSG00000089053	ANAPC5	795.442	0.00287728	0.997943	0.0593653	0.982865	0.133218	1	0.0109346	1
ENSG00000089057	SLC23A2	41.844	-0.0204917	0.99056	0.186758	0.959142	-0.00352011	1	-0.0551848	0.999338
ENSG00000089060	SLC8B1	6.44728	-0.297212	NA	-0.169112	0.951592	-0.299116	1	-0.113342	0.999338
ENSG00000089063	TMEM230	194.719	0.0144719	0.980614	-0.343308	0.243119	-0.270674	0.89537	-0.112479	0.976063
ENSG00000089091	DZANK1	9.21807	-0.196938	0.821887	-0.016047	0.994754	-0.569195	0.795548	-0.492324	0.611035
ENSG00000089094	KDM2B	37.758	-0.437421	0.598524	0.193785	0.957424	0.126027	1	0.0270441	1
ENSG00000089101	CFAP61	1.00374	0.00985216	NA	-0.119897	NA	-0.0161203	NA	0.00920331	NA
ENSG00000089116	LHX5	0.0908247	-0.0101135	NA	0	NA	0	NA	0	NA
ENSG00000089123	TASP1	38.1173	0.389158	0.677935	0.262304	0.94556	0.259575	1	0.0851757	0.999338
ENSG00000089127	OAS1	0.662728	0.0464807	NA	0.0455869	NA	0.045349	NA	-0.0361205	NA
ENSG00000089154	GCN1	69.7972	0.368333	0.695143	0.20648	0.95569	0.0619662	1	0.116217	0.999338
ENSG00000089157	RPLP0	428.262	-0.151117	0.841376	-0.215363	0.902379	-0.176772	1	-0.130615	0.999338
ENSG00000089159	PXN	14.931	-0.131665	0.926284	0.475205	0.770505	0.0396996	1	0.170565	0.999338
ENSG00000089163	SIRT4	2.76561	-0.071181	NA	-0.0836077	NA	-0.174307	1	-0.0879591	0.999338
ENSG00000089169	RPH3A	0.0470557	0	NA	0	NA	0	NA	-0.0159999	NA
ENSG00000089177	KIF16B	43.8136	0.539753	0.488919	-0.44866	0.808476	0.00168494	1	0.0374372	1
ENSG00000089195	TRMT6	107.221	0.178973	0.816511	-0.100084	0.96813	0.231675	1	0.272534	0.9249
ENSG00000089199	CHGB	0.991842	0.146332	NA	0.0353058	NA	0.142107	NA	-0.0715318	NA
ENSG00000089220	PEBP1	884.835	-0.106299	0.769604	0.13892	0.855554	0.0191132	1	0.18356	0.805483
ENSG00000089225	TBX5	0	NA	NA	NA	NA	NA	NA	NA	NA
ENSG00000089234	BRAP	89.8104	-0.035894	0.978184	0.417736	0.725436	0.310313	1	0.189045	0.998062
ENSG00000089248	ERP29	301.251	-0.157097	0.691038	-0.295268	0.46114	0.00408765	1	0.107165	0.991535
ENSG00000089250	NOS1	0	NA	NA	NA	NA	NA	NA	NA	NA
ENSG00000089280	FUS	391.317	-0.0895357	0.923937	-0.0906074	0.9717	-0.0841538	1	0.0749448	0.999338
ENSG00000089289	IGBP1	72.4052	0.138184	0.866433	-0.216988	0.909882	-0.147263	1	-0.095769	0.999338
ENSG00000089327	FXYD5	317.36	0.248876	0.570128	0.0384382	0.986532	0.00190155	1	-0.266923	0.805483
ENSG00000089335	ZNF302	51.9934	-0.229708	0.784366	0.510467	0.588377	-0.0305001	1	-0.0771773	0.999338
ENSG00000089351	GRAMD1A	75.0862	-1.43573	6.02131e-05	-0.15817	0.96358	-0.608734	0.89537	0.263091	0.974828
ENSG00000089356	FXYD3	0	NA	NA	NA	NA	NA	NA	NA	NA
ENSG00000089472	HEPH	0	NA	NA	NA	NA	NA	NA	NA	NA
ENSG00000089486	CDIP1	32.0412	0.510795	0.345275	0.708429	0.235698	0.57743	0.825162	0.385311	0.838022
ENSG00000089505	CMTM1	0.044016	-0.0101135	NA	0	NA	0	NA	0	NA
ENSG00000089558	KCNH4	0.230324	-0.0517337	NA	0	NA	-0.0153059	NA	0	NA
ENSG00000089597	GANAB	112.595	0.622651	0.0134705	0.110208	0.95569	0.151269	1	0.221806	0.897393
ENSG00000089639	GMIP	5.44982	-0.037646	NA	-0.0486097	0.988388	-0.0590145	1	0.284895	0.96916
ENSG00000089682	RBM41	51.9659	-0.0193963	0.99056	-0.22968	0.948634	-0.129099	1	-0.108095	0.999338
ENSG00000089685	BIRC5	794.809	-0.222188	0.206799	-0.429614	0.00138014	-0.166278	1	-0.21704	0.428037
ENSG00000089692	LAG3	0.113709	-0.0101135	NA	0	NA	-0.0153059	NA	0	NA
ENSG00000089693	MLF2	417.53	-0.264193	0.512036	0.0520105	0.982945	-0.0535967	1	0.0717905	0.999338
ENSG00000089723	OTUB2	7.23535	-0.118782	0.919313	-0.324426	0.853769	-0.422356	1	-0.235887	0.976063
ENSG00000089737	DDX24	225.068	0.295682	0.481358	-0.199665	0.877376	0.0245956	1	-0.286922	0.785006
ENSG00000089775	ZBTB25	7.3389	-0.00172351	0.999115	-0.869501	0.23891	-0.233086	1	-0.832219	0.288201
ENSG00000089818	NECAP1	27.6793	-0.261357	0.742364	-0.0473189	0.987756	-0.253786	1	0.0462318	0.999338
ENSG00000089820	ARHGAP4	1.00187	0.00297464	NA	0.0290998	NA	-0.0321962	NA	-0.0541367	NA
ENSG00000089847	ANKRD24	0.639717	-0.0562348	NA	0	NA	-0.0572476	NA	0	NA
ENSG00000089876	DHX32	47.3161	-0.874879	0.0821148	-0.910835	0.131759	-0.638004	0.903973	-0.1646	0.999338
ENSG00000089902	RCOR1	13.0177	-0.249935	0.799995	-0.388572	0.825776	-0.12767	1	-0.54875	0.683446
ENSG00000089916	GPATCH2L	25.7397	-0.247461	0.820565	-0.863845	0.209329	-0.216023	1	-1.01544	0.0719959
ENSG00000090006	LTBP4	5.69939	-0.0908509	NA	0.174657	0.958082	-0.273528	1	0.158597	0.999338
ENSG00000090013	BLVRB	199.376	0.122318	0.868023	-0.203464	0.896507	-0.222891	1	-0.169996	0.976063
ENSG00000090020	SLC9A1	11.4709	-0.314701	0.755148	-0.021499	0.994754	-0.204542	1	-0.215554	0.999338
ENSG00000090054	SPTLC1	124.67	0.133756	0.900045	0.221714	0.938566	-0.152309	1	-0.206517	0.986424
ENSG00000090060	PAPOLA	201.092	0.17922	0.772449	-0.281435	0.78596	-0.0779098	1	-0.31359	0.792296
ENSG00000090061	CCNK	25.1726	0.324415	0.718207	0.115329	0.974946	0.288363	1	-0.105825	0.999338
ENSG00000090097	PCBP4	2.41746	-0.112742	NA	0.130025	NA	-0.0984181	1	0.0254572	1
ENSG00000090104	RGS1	0	NA	NA	NA	NA	NA	NA	NA	NA
ENSG00000090238	YPEL3	21.3149	-0.361433	0.682194	-0.0821075	0.983916	-0.316815	1	-0.428271	0.867222
ENSG00000090263	MRPS33	239.762	-0.295549	0.341193	-0.14177	0.9191	0.0537874	1	0.402341	0.256061
ENSG00000090266	NDUFB2	1458.17	-0.131266	0.742364	0.071586	0.96358	0.0898768	1	0.718221	1.20535e-05
ENSG00000090273	NUDC	136.597	0.460219	0.11359	0.206022	0.852521	0.0679911	1	0.240923	0.859856
ENSG00000090316	MAEA	200.349	-0.0814869	0.936367	-0.0176603	0.993806	0.0962435	1	-0.0639127	0.999338
ENSG00000090339	ICAM1	0.434237	0.00776853	NA	0.0381911	NA	0.00516843	NA	0.0394937	NA
ENSG00000090372	STRN4	122.673	-1.18516	0.000697452	-0.242539	0.928128	-0.447079	1	0.214053	0.987062
ENSG00000090376	IRAK3	0.169327	-0.0101135	NA	0	NA	0	NA	-0.0298733	NA
ENSG00000090382	LYZ	0.0527428	0	NA	0	NA	0	NA	0	NA
ENSG00000090402	SI	0	NA	NA	NA	NA	NA	NA	NA	NA
ENSG00000090432	MUL1	44.6383	0.407149	0.560455	-0.32354	0.855962	-0.210463	1	-0.238742	0.976063
ENSG00000090447	TFAP4	24.2905	0.0155388	0.99259	0.317126	0.903047	-0.0834307	1	0.218651	0.999338
ENSG00000090470	PDCD7	29.6938	-0.643442	0.349698	0.227192	0.951592	0.31205	1	0.178289	0.999338
ENSG00000090487	SPG21	219.008	-0.526081	0.0822448	0.254487	0.813024	0.418228	0.822673	0.289181	0.819855
ENSG00000090512	FETUB	0	NA	NA	NA	NA	NA	NA	NA	NA
ENSG00000090520	DNAJB11	201.421	-0.00729017	0.99259	0.12414	0.94556	0.0843967	1	-0.220369	0.842755
ENSG00000090530	P3H2	7.92382	-0.773611	0.161696	-0.834991	0.210657	-0.199685	1	0.281794	0.96916
ENSG00000090534	THPO	2.90203	0	NA	-0.460677	NA	-0.168671	1	-0.959587	0.0194267
ENSG00000090539	CHRD	3.94821	-0.0549541	NA	-0.388876	NA	0.176062	1	-0.524271	0.746363
ENSG00000090554	FLT3LG	0.469744	-0.0806286	NA	-0.0950296	NA	-0.0334388	NA	-0.0323527	NA
ENSG00000090565	RAB11FIP3	20.0501	-0.165625	0.900729	1.09304	0.0545647	0.542428	1	0.428616	0.890746
ENSG00000090581	GNPTG	62.5337	0.335918	0.609095	0.152459	0.957424	-0.296579	1	-0.0650682	0.999338
ENSG00000090612	ZNF268	12.5088	0.107454	0.942538	-0.218291	0.952617	-0.0812264	1	0.172587	0.999338
ENSG00000090615	GOLGA3	25.1042	0.0470914	0.977729	0.0443233	0.992031	0.117292	1	-0.156172	0.999338
ENSG00000090621	PABPC4	86.1235	-0.322071	0.665603	0.056879	0.986574	0.009697	1	0.0403804	0.999508
ENSG00000090659	CD209	5.45464	-0.388393	NA	-0.139429	0.96813	-0.061275	1	-0.342078	0.951607
ENSG00000090661	CERS4	28.4262	-0.234804	0.841354	-0.12265	0.974946	-0.496744	1	-0.430534	0.890746
ENSG00000090674	MCOLN1	29.4156	-0.602913	0.245886	-0.209999	0.949766	-0.245053	1	0.55748	0.613509
ENSG00000090686	USP48	217.729	-0.358023	0.528388	-0.384836	0.698074	-0.402714	1	-0.210361	0.974828
ENSG00000090776	EFNB1	13.622	-0.688003	0.295918	0.137167	0.971396	-0.539912	1	-0.364627	0.940536
ENSG00000090857	PDPR	9.78228	-0.398018	0.636113	0.0519889	0.987756	-0.0827217	1	-0.0861006	0.999338
ENSG00000090861	AARS	119.257	-0.226304	0.831405	0.00548205	0.997971	-0.0793947	1	-0.0278184	1
ENSG00000090863	GLG1	75.428	-0.50671	0.366289	-0.174012	0.954991	0.294321	1	0.869177	0.0798838
ENSG00000090889	KIF4A	27.1251	0.0493193	0.975864	0.0960554	0.982945	0.0727329	1	-0.139148	0.999338
ENSG00000090905	TNRC6A	71.6066	0.187439	0.840287	0.209963	0.94611	0.0162833	1	0.117403	0.999338
ENSG00000090924	PLEKHG2	10.9767	-0.0669511	0.968073	0.20066	0.957424	0.24679	1	-0.217632	0.999338
ENSG00000090932	DLL3	43.2761	-0.0402535	0.973343	0.185643	0.949766	0.0753186	1	-0.0864428	0.999338
ENSG00000090971	NAT14	60.0766	-0.281356	0.683746	-0.0628655	0.98464	-0.130513	1	-0.119031	0.999338
ENSG00000090975	PITPNM2	5.05524	0.0427335	NA	0.144568	0.96661	-0.102821	1	0.0128107	1
ENSG00000090989	EXOC1	85.385	0.478734	0.416466	-0.00617282	0.99728	0.0549184	1	-0.0336625	1
ENSG00000091009	RBM27	24.586	-0.0491102	0.975073	-0.0828832	0.983916	-0.14246	1	-0.0924877	0.999338
ENSG00000091010	POU4F3	0.143486	0	NA	0	NA	0	NA	-0.0298733	NA
ENSG00000091039	OSBPL8	101.229	0.212277	0.75151	0.382335	0.666108	-0.437179	0.927142	0.00313935	1
ENSG00000091073	DTX2	22.3091	0.778232	0.204719	0.121849	0.975901	0.430761	1	0.621985	0.642265
ENSG00000091106	NLRC4	0.551167	0.0491027	NA	0.0803255	NA	0.0111063	NA	-0.00147524	NA
ENSG00000091127	PUS7	95.2096	0.131278	0.912469	0.532833	0.588377	0.706741	0.639268	-0.367292	0.892091
ENSG00000091128	LAMB4	0.200463	0.0315068	NA	0.02366	NA	0.0263143	NA	0.0256203	NA
ENSG00000091129	NRCAM	55.8152	-0.0587256	0.969813	1.03738	0.0606787	-0.184104	1	0.0801148	0.999338
ENSG00000091136	LAMB1	165.158	0.61302	0.196975	-0.0270344	0.992453	-0.0534176	1	-0.484677	0.637075
ENSG00000091137	SLC26A4	1.19653	0	NA	0	NA	-0.0111569	1	-0.116693	NA
ENSG00000091138	SLC26A3	0.626567	-0.0771722	NA	0.0237002	NA	0.023518	NA	0.0239941	NA
ENSG00000091140	DLD	531.864	0.012375	0.989916	0.0947755	0.964325	0.101485	1	-0.534914	0.130661
ENSG00000091157	WDR7	32.207	0.157707	0.906458	-0.522241	0.712499	-0.300224	1	-0.203578	0.999338
ENSG00000091164	TXNL1	667.819	-0.23157	0.636113	-0.612863	0.0399241	-0.0870556	1	-0.217638	0.912181
ENSG00000091181	IL5RA	0.255586	-0.0378603	NA	0	NA	-0.0153059	NA	0	NA
ENSG00000091262	ABCC6	8.11463	0.457498	0.599154	-0.0215947	0.994754	0.057342	1	-0.29396	0.974828
ENSG00000091317	CMTM6	153.715	0.124901	0.824553	-0.0286395	0.987756	-0.055117	1	-0.104956	0.999338
ENSG00000091409	ITGA6	29.1771	0.319571	0.74582	-0.33871	0.892885	-0.377077	1	-0.00729105	1
ENSG00000091428	RAPGEF4	27.8536	-0.108852	0.94212	0.328204	0.903354	0.994979	0.265873	0.328454	0.962319
ENSG00000091436	MAP3K20	114.262	0.297749	0.708409	0.0377751	0.991922	-0.206886	1	0.21617	0.985301
ENSG00000091482	SMPX	1.38648	0.109995	NA	0.0775607	NA	0.0831091	1	-0.0124931	NA
ENSG00000091483	FH	218.992	0.34578	0.281805	0.0436041	0.983916	0.186998	1	0.197583	0.917045
ENSG00000091490	SEL1L3	32.3918	0.219139	0.841354	0.249644	0.94556	0.20882	1	0.135228	0.999338
ENSG00000091513	TF	0.62012	0.00891687	NA	0.0196944	NA	0.0194846	NA	0.0199611	NA
ENSG00000091527	CDV3	88.9321	0.0684873	0.944518	-0.0549452	0.98464	0.155299	1	0.0888117	0.999338
ENSG00000091536	MYO15A	1.01941	0.0284033	NA	-0.0478619	NA	0.00439047	1	-0.0980113	NA
ENSG00000091542	ALKBH5	60.8815	-0.449077	0.503077	0.475544	0.693494	0.26511	1	0.289135	0.96148
ENSG00000091583	APOH	0	NA	NA	NA	NA	NA	NA	NA	NA
ENSG00000091592	NLRP1	17.7365	-0.687138	0.267982	-0.561598	0.643845	-0.565145	1	-0.0726121	0.999338
ENSG00000091622	PITPNM3	1.1265	-0.121536	NA	-0.146411	NA	0.0192761	1	0.0025438	NA
ENSG00000091640	SPAG7	126.319	0.0697204	0.940751	-0.140249	0.952617	-0.173628	1	0.105749	0.999338
ENSG00000091651	ORC6	163.659	-0.0130151	0.991392	0.233416	0.890467	0.0906486	1	0.252682	0.929188
ENSG00000091656	ZFHX4	17.8742	0.0198149	0.99056	0.177495	0.962137	0.32167	1	0.341777	0.951347
ENSG00000091664	SLC17A6	0	NA	NA	NA	NA	NA	NA	NA	NA
ENSG00000091704	CPA1	0	NA	NA	NA	NA	NA	NA	NA	NA
ENSG00000091732	ZC3HC1	196.159	-0.00239393	0.997981	-0.0792546	0.982865	-0.240826	1	-0.487137	0.600442
ENSG00000091831	ESR1	0	NA	NA	NA	NA	NA	NA	NA	NA
ENSG00000091844	RGS17	5.26762	-0.286007	NA	-0.194876	0.954991	0.064887	1	-0.539697	0.69957
ENSG00000091879	ANGPT2	2.15005	0.0929337	NA	-0.205112	NA	0.075488	1	-0.23958	0.927959
ENSG00000091947	TMEM101	91.5163	-0.173907	0.798632	-0.314159	0.768186	-0.410493	0.967213	-0.127299	0.999338
ENSG00000091972	CD200	0.177966	0	NA	0	NA	-0.0430527	NA	0	NA
ENSG00000091986	CCDC80	17.8923	0.575092	0.429363	-0.335407	0.896952	0.078737	1	0.645501	0.585601
ENSG00000092009	CMA1	0	NA	NA	NA	NA	NA	NA	NA	NA
ENSG00000092010	PSME1	187.83	0.0756929	0.914654	-0.544517	0.0652944	-0.0710374	1	-0.456397	0.2089
ENSG00000092020	PPP2R3C	108.082	0.144376	0.849754	-0.335573	0.718204	0.438728	0.918113	-0.64972	0.0905319
ENSG00000092036	HAUS4	34.0788	-0.324231	0.663499	-1.0413	0.00918493	-0.480984	1	-1.02766	0.00766257
ENSG00000092051	JPH4	0.201825	-0.0101135	NA	-0.0179602	NA	-0.0153059	NA	0	NA
ENSG00000092054	MYH7	0.0470557	0	NA	0	NA	0	NA	-0.0159999	NA
ENSG00000092067	CEBPE	0.0433216	0	NA	0	NA	-0.0153059	NA	0	NA
ENSG00000092068	SLC7A8	18.871	0.239597	0.82931	-0.124856	0.973498	0.392236	1	-0.029568	1
ENSG00000092094	OSGEP	65.1866	0.0602602	0.96587	-0.450307	0.699087	0.070194	1	-0.182255	0.999338
ENSG00000092096	SLC22A17	4.37691	0.296286	NA	-0.549775	NA	-0.30573	1	-0.150287	0.999338
ENSG00000092098	RNF31	0.604684	-0.0219408	NA	-0.0162412	NA	-0.00542484	NA	0.0980619	NA
ENSG00000092108	SCFD1	381.341	0.124986	0.873482	-0.520505	0.284533	-0.208648	1	-0.706843	0.0366678
ENSG00000092140	G2E3	38.8864	0.0993172	0.946851	-0.413789	0.822968	-0.051371	1	-0.294745	0.96916
ENSG00000092148	HECTD1	54.4935	0.035172	0.980614	-0.221973	0.951592	-0.364628	1	-0.0798679	0.999338
ENSG00000092199	HNRNPC	396.963	-0.00292636	0.997943	-0.352456	0.485872	-0.0877742	1	-0.00820438	1
ENSG00000092200	RPGRIP1	0.100584	-0.0239869	NA	0	NA	0	NA	0	NA
ENSG00000092201	SUPT16H	57.2482	-0.0269502	0.980614	-0.551926	0.362373	-0.333865	1	-0.195599	0.979456
ENSG00000092203	TOX4	27.4382	0.208711	0.849754	-0.272753	0.926251	-0.0960534	1	-0.41823	0.864879
ENSG00000092208	GEMIN2	59.0207	-0.15977	0.870443	-0.433059	0.692053	0.344941	1	-0.376039	0.844974
ENSG00000092295	TGM1	0.313452	-0.0231878	NA	0	NA	-0.0569261	NA	0	NA
ENSG00000092330	TINF2	17.7851	0.274139	0.789763	-0.224334	0.951592	0.104596	1	0.152919	0.999338
ENSG00000092345	DAZL	0	NA	NA	NA	NA	NA	NA	NA	NA
ENSG00000092377	TBL1Y	1.29548	-0.0322532	NA	0.102652	NA	-0.0356727	1	0.059377	NA
ENSG00000092421	SEMA6A	21.6275	0.812042	0.171443	0.616838	0.578856	0.213434	1	0.799551	0.33781
ENSG00000092439	TRPM7	46.4475	0.271455	0.801683	0.553852	0.682124	0.193819	1	0.554847	0.760723
ENSG00000092445	TYRO3	11.7531	-0.251009	0.824553	-0.0456341	0.991922	-0.0122739	1	-0.262729	0.98419
ENSG00000092470	WDR76	74.4482	-0.161972	0.848852	0.797756	0.0656785	0.242454	1	0.221814	0.96916
ENSG00000092529	CAPN3	0	NA	NA	NA	NA	NA	NA	NA	NA
ENSG00000092531	SNAP23	54.5159	0.151815	0.887816	0.346089	0.833335	-0.081246	1	-0.106967	0.999338
ENSG00000092607	TBX15	0.678838	-0.0757341	NA	-0.0213713	NA	0.0174516	NA	0.0177992	NA
ENSG00000092621	PHGDH	834.687	-0.106482	0.890163	-0.428514	0.409214	-0.483197	0.613303	-0.19146	0.962754
ENSG00000092758	COL9A3	7.89114	-0.313019	0.738381	0.377607	0.839681	0.346298	1	-0.0624029	0.999338
ENSG00000092820	EZR	489.232	0.16452	0.825571	0.130373	0.957809	-0.0214239	1	0.0855492	0.999338
ENSG00000092841	MYL6	1202.65	0.0634375	0.903656	-0.184599	0.782906	-0.0582202	1	-0.144211	0.938731
ENSG00000092847	AGO1	19.235	-0.48393	0.5615	-0.214436	0.954991	-0.016298	1	-0.0768192	0.999338
ENSG00000092850	TEKT2	0.179325	0	NA	-0.0179602	NA	-0.0153059	NA	0	NA
ENSG00000092853	CLSPN	88.9548	0.402514	0.472134	0.0569623	0.985082	0.460632	0.984461	-0.0889739	0.999338
ENSG00000092871	RFFL	5.72101	-0.0822851	NA	0.0422715	0.992031	0.188192	1	-0.267109	0.976376
ENSG00000092929	UNC13D	1.0641	0.0266168	NA	0.00635686	NA	0.00489749	1	-0.000393621	NA
ENSG00000092931	MFSD11	102.613	-0.117009	0.926937	-0.128553	0.96813	-0.127003	1	0.0541668	0.999338
ENSG00000092964	DPYSL2	37.4621	-0.345238	0.717628	-0.430322	0.81672	-0.169453	1	-0.364698	0.937263
ENSG00000092969	TGFB2	3.20003	0.114421	NA	0.0902604	NA	0.0322011	1	-0.075985	0.999338
ENSG00000092978	GPATCH2	23.7957	0.140012	0.917576	0.186385	0.959142	-0.279997	1	-0.345414	0.95061
ENSG00000093000	NUP50	81.0572	-0.589477	0.0386483	-0.182149	0.919319	-0.403168	0.888283	-0.221375	0.931968
ENSG00000093009	CDC45	614.911	-0.0613385	0.939722	-0.301467	0.686778	-0.23318	1	-0.348432	0.613509
ENSG00000093010	COMT	230.594	0.455971	0.164967	-0.192249	0.891236	-0.405602	0.795548	-0.43187	0.357879
ENSG00000093072	ADA2	0.0717432	0	NA	0	NA	0	NA	-0.0159999	NA
ENSG00000093100	AC016026.1	0	NA	NA	NA	NA	NA	NA	NA	NA
ENSG00000093134	VNN3	0	NA	NA	NA	NA	NA	NA	NA	NA
ENSG00000093144	ECHDC1	197.936	-0.308267	0.604588	-0.0172085	0.993806	-0.0192716	1	-0.377451	0.763576
ENSG00000093167	LRRFIP2	89.789	-0.304545	0.707287	-0.354789	0.82734	-0.497263	1	-0.424941	0.816721
[truncated: 56,736 more rows]
