# Supplementary material for: RNA Methyltransferase METTL16’s Protein Domains Have Differential Functional Effects on Cell Processes
Source: Curr Issues Mol Biol. 2023 Jun 29;45(7):5460–80. doi: 10.3390/cimb45070346 (PMC10378215; doi:10.3390/cimb45070346)
Supplement: Supplementary file 1 [file cimb-45-00346-s001.zip › Supplemental Dataset 2_MassSpec_FoldChange.xlsx]

## Sheet: Summary
Accession	GeneSymbol	WT Mean	HEK293 Mean	PP185/186AA Mean	N184A Mean	N-term Mean	DeltaLinker Mean	WT-HEK293 Diff	PP185/186-WT Diff	N184A-WT Diff	N-term-WT Diff	DeltaLinker-WT Diff	WT-HEK293 P value	PP185/186-WT P value	N184A-WT P value	N-term-WT P value	DeltaLinker-WT P value
A0A7I2V3P5	MARK3	-1.118	-7.249	-4.976	-6.156	-5.017	-5.532	6.131	-3.858	-5.038	-3.899	-4.415	0.011606	0.122014	0.021664	0.087477	0.040421
Q15427	SF3B4	1.999	-4.127	-4.572	-4.742	-5.114	-3.728	6.126	-6.571	-6.741	-7.113	-5.727	0.001263	0.001664	0.000759	0.000685	0.028983
Q9NRW1	RAB6B	-0.28	-5.906	-0.4978	-0.5446	-1.673	-4.718	5.626	-0.2178	-0.2646	-1.393	-4.438	5.8e-05	0.665427	0.53463	0.287725	0.034028
D6R9D6	RBM47	0.2393	-5.343	-5.366	-3.221	-3.086	-3.874	5.582	-5.605	-3.46	-3.325	-4.113	0.007776	0.021422	0.116083	0.091328	0.027092
P56182	RRP1	2.669	-2.64	-0.5433	-0.3698	1.075	0.296	5.309	-3.212	-3.039	-1.594	-2.373	0.024489	0.065363	0.001154	0.194608	0.122317
J3QSY4	NHP2	-1.185	-6.372	-1.6	0.7538	-3.99	-1.761	5.187	-0.9695	1.384	-2.804	-0.5756	0.002347	0.326837	0.080073	0.037043	0.508587
Q70CQ3	USP30	0.0994	-5.085	-1.603	-2.54	-1.872	-0.0369	5.184	-1.703	-2.639	-1.972	-0.1363	0.000391	0.019308	0.093438	0.084491	0.92944
A6NHL2	TUBAL3	-1.75	-6.918	-2.547	-2.955	-8.077	-5.525	5.168	-0.7973	-1.205	-6.327	-3.775	0.010958	0.636345	0.575303	0.004504	0.087036
B7Z982	PLRG1	-0.6672	-5.822	-2.523	-1.204	-1.502	-1.264	5.155	-1.856	-0.5371	-0.8353	-0.5966	0.010278	0.164983	0.451914	0.15737	0.240151
A0A7P0TAW4	ANO6	-1.547	-6.631	-5.538	-6.875	-6.902	-4.47	5.084	-3.991	-5.328	-5.355	-2.923	0.000558	0.024845	0.00087	0.000857	0.024325
P61018	RAB4B	-2.128	-7.212	-6.153	-7.005	-6.744	-6.801	5.084	-4.025	-4.877	-4.616	-4.672	0.01175	0.039887	0.015524	0.01925	0.018696
Q7L0Y3	TRMT10C	0.6047	-4.33	-0.7542	-0.06264	-0.001001	-3.642	4.934	-1.359	-0.6673	-0.6057	-4.247	0.004919	0.197139	0.556725	0.704395	0.061565
P16930	FAH	0.7576	-4.071	1.037	-0.477	0.4046	-0.003606	4.828	0.2792	-1.235	-0.353	-0.7612	0.009619	0.725568	0.290175	0.534934	0.221923
A0A590UK95	ITCH	1.975	-2.728	2.172	2.8	1.306	1.677	4.704	0.1968	0.8244	-0.6698	-0.2986	2.1e-05	0.849197	0.307302	0.547414	0.576004
H0YNG3	SEC11A	-1.232	-5.907	-4.251	-0.1743	-2.118	-3.09	4.675	-3.019	1.057	-0.8865	-1.858	0.016153	0.094504	0.514624	0.625162	0.38544
Q13033	STRN3	-1.478	-6.132	-2.064	-5.749	-4.487	-3.694	4.655	-0.5865	-4.272	-3.009	-2.216	0.00321	0.506741	0.001787	0.034813	0.032313
P61026	RAB10	-2.448	-6.907	-5.824	-7.035	-4.867	-6.96	4.459	-3.376	-4.587	-2.419	-4.513	0.058977	0.211512	0.055862	0.28334	0.13766
J3KNA1	KIF5A	-2.747	-7.19	-6.817	-4.67	-6.849	-6.757	4.443	-4.07	-1.923	-4.102	-4.01	0.009774	0.016867	0.284274	0.01638	0.015297
C9JP00	MBNL1	0.2279	-3.887	-3.744	-2.126	-1.763	-2.442	4.114	-3.972	-2.354	-1.991	-2.67	0.054184	0.064014	0.205012	0.186233	0.203319
O43423	ANP32C	-1.134	-5.224	-2.818	-3.532	0.08069	-4.627	4.09	-1.685	-2.399	1.214	-3.493	0.026907	0.355369	0.222016	0.378064	0.076532
Q8TC12	RDH11	1.663	-2.42	1.209	-0.7774	-1.165	1.55	4.082	-0.4537	-2.44	-2.828	-0.1127	0.00239	0.576816	0.082396	0.011171	0.918433
F5H4X2	HMBS	-1.04	-5.058	-4.434	-3.738	-2.361	-1.615	4.017	-3.394	-2.698	-1.321	-0.5742	0.064384	0.077786	0.142228	0.453168	0.742615
Q8NEY8	PPHLN1	1.524	-2.483	0.4152	-3.313	0.5152	0.6273	4.007	-1.109	-4.837	-1.009	-0.8966	0.010473	0.341846	0.028219	0.448881	0.505956
A0A7I2V3Z3	KPNA2	-2.802	-6.785	-6.871	-4.349	-5.993	-6.002	3.983	-4.069	-1.547	-3.191	-3.199	0.029356	0.0308	0.46414	0.07015	0.070588
P98172	EFNB1	0.09014	-3.892	-4.177	-0.04931	-2.254	-0.4059	3.982	-4.267	-0.1395	-2.345	-0.4961	0.064768	0.067646	0.925275	0.148493	0.680588
Q8N122	RPTOR	0.9795	-2.989	-0.7727	-1.446	0.5426	0.6541	3.969	-1.752	-2.425	-0.4369	-0.3254	0.040261	0.028329	0.003169	0.659028	0.698508
P55060	CSE1L	7.704	3.757	4.899	4.047	5.798	3.567	3.947	-2.805	-3.657	-1.907	-4.138	0.002598	0.028762	0.001467	0.164426	0.00152
Q99816	TSG101	0.6349	-3.296	0.8226	-2.079	-2.02	-0.8177	3.931	0.1877	-2.714	-2.654	-1.453	0.08455	0.691636	0.168279	0.106206	0.405565
H0YL91	TRIP4	-0.0054	-3.882	-0.8011	-3.311	-1.416	-1.956	3.877	-0.7957	-3.306	-1.41	-1.95	0.131552	0.713537	0.167702	0.618601	0.440844
Q7L2J0	MEPCE	1.938	-1.929	0.3503	-2.176	-1.35	0.7698	3.868	-1.588	-4.115	-3.288	-1.169	0.029941	0.039255	0.02701	0.036568	0.328007
P15259	PGAM2	-1.093	-4.947	0.2724	-4.142	-2.061	-0.9569	3.854	1.365	-3.049	-0.9681	0.1361	0.052598	0.369911	0.118375	0.626412	0.943671
I3L3W3	METTL16	1.199	-2.65	-1.919	-7.78	-6.293	2.183	3.848	-3.118	-2.563	-1.077	0.9839	0.001143	0.000809	0.015128	0.224403	0.101997
Q92793	CREBBP	-3.113	-6.953	-5.162	-4.322	-6.479	-5.785	3.84	-2.049	-1.209	-3.366	-2.672	0.007746	0.093015	0.524636	0.015368	0.079002
A0A6Q8PFU7	GARS1	-3.128	-6.95	-0.9279	-6.892	-5.373	-2.509	3.822	2.2	-3.764	-2.245	0.6186	0.006665	0.068378	0.010764	0.220082	0.687134
E5RG94	IMPA1	-1.971	-5.701	-0.3802	-1.123	-5.138	-0.7727	3.73	1.59	0.8476	-3.168	1.198	0.003753	0.213974	0.567125	0.043137	0.31878
Q16698	DECR1	0.5058	-3.223	-3.539	-5.405	-0.9739	-5.109	3.729	-4.044	-5.91	-1.48	-5.614	0.065609	0.059239	0.005295	0.302902	0.006779
A0A590UK01	SRSF6	-2.688	-6.407	-6.256	-6.878	-5.251	-7.056	3.718	-3.567	-4.189	-2.563	-4.367	0.062921	0.064297	0.041997	0.175708	0.035519
Q9NX08	COMMD8	-0.5543	-4.27	-0.9247	-4.745	-1.952	-1.275	3.716	-0.3705	-4.191	-1.397	-0.7206	0.081124	0.410992	0.007756	0.315054	0.435799
E9PM36	RPS2	-0.5551	-4.261	-5.257	-6.866	-3.652	-5.275	3.706	-4.701	-6.311	-3.097	-4.72	0.179698	0.062121	0.014811	0.253272	0.060525
E9PQI5	CHMP4A	-0.6654	-4.312	-2.179	-4.366	-3.601	-1.605	3.647	-1.514	-3.701	-2.935	-0.9398	0.015057	0.044823	0.082669	0.059791	0.451274
A0A5F9UJX7	SDF4	1.137	-2.502	-0.5154	1.548	-2.044	-2.891	3.639	-1.653	0.4109	-3.181	-4.028	0.096865	0.077742	0.31204	0.00764	0.000785
P22090	RPS4Y1	-1.935	-5.54	-4.457	-5.241	-3.272	-4.508	3.605	-2.522	-3.306	-1.337	-2.572	0.108032	0.26442	0.104702	0.467916	0.1943
P31323	PRKAR2B	-1.325	-4.92	1.413	-4.206	-4.924	-1.489	3.596	2.738	-2.882	-3.599	-0.1639	0.041623	0.042796	0.040697	0.033011	0.910608
Q9BYC9	MRPL20	-1.722	-5.316	-3.818	-6.4	-3.627	-5.414	3.594	-2.096	-4.678	-1.906	-3.692	0.022469	0.0957	3.2e-05	0.246529	0.004531
A0A494C024	MYH11	-1.107	-4.698	-2.969	-3.939	-6.767	-0.2886	3.591	-1.862	-2.832	-5.66	0.8184	0.064356	0.517505	0.120021	0.005134	0.701915
A0A0D9SEU2	BLOC1S5	-0.5376	-4.12	-4.1	-2.551	-3.81	-1.421	3.582	-3.563	-2.013	-3.272	-0.8834	0.087176	9e-06	0.055074	0.059827	0.021717
F8W7C6	RPL10	0.4485	-3.111	-3.416	-1.675	-1.085	-1.451	3.56	-3.864	-2.123	-1.533	-1.899	0.036365	0.14448	0.298406	0.382524	0.331144
H0Y2X5	ALDH1A3	-1.703	-5.249	-3.219	-3.17	-3.714	-2.399	3.547	-1.517	-1.467	-2.011	-0.696	0.036527	0.101288	0.427487	0.25131	0.72903
B3KTQ9	P4HB	-0.6352	-4.169	-3.774	-2.881	-3.038	0.3258	3.534	-3.139	-2.245	-2.403	0.961	0.117196	0.103181	0.335376	0.121251	0.467117
A0A3B3ITT5	RPL29	-3.614	-7.134	-5.291	-6.828	-4.218	-4.383	3.52	-1.677	-3.215	-0.6047	-0.769	0.011104	0.17971	0.019634	0.621988	0.520831
Q9H2J4	PDCL3	0.3153	-3.157	-1.345	-1.084	-2.183	-2.355	3.472	-1.661	-1.399	-2.499	-2.67	0.063828	0.050972	0.291255	0.055876	0.070839
B3KR26	PRCP	-3.758	-7.219	-5.228	-5.385	-4.132	-5.075	3.461	-1.471	-1.628	-0.3745	-1.317	0.009566	0.167618	0.212151	0.741003	0.293393
A0A7I2V5C5	CTSC	-1.073	-4.503	-1.29	-2.144	-2.553	-1.098	3.43	-0.2167	-1.071	-1.481	-0.02477	0.097562	0.680095	0.21889	0.281261	0.962005
Q9BYX7	POTEKP	-0.6771	-4.093	-3.014	-6.467	-5.847	-2.791	3.416	-2.337	-5.79	-5.17	-2.114	0.174933	0.096664	0.000338	0.001878	0.080688
Q9H9Q2	COPS7B	-2.552	-5.962	-2.07	-5.511	-4.489	-5.328	3.41	0.4824	-2.959	-1.937	-2.776	0.056112	0.763516	0.09376	0.249268	0.101324
Q9NX70	MED29	-3.764	-7.168	-6.842	-5.78	-2.722	-5.435	3.404	-3.078	-2.016	1.042	-1.671	0.05005	0.06891	0.221007	0.540714	0.315403
A0A7I2V517	NDUFS2	-3.231	-6.613	-2.499	-6.888	-7.087	-5.414	3.381	0.7322	-3.656	-3.855	-2.183	0.022964	0.53232	0.018673	0.014114	0.101012
A0A6Q8PGF9	PRPS1	-0.2154	-3.589	-1.853	-1.951	-3.015	-0.9208	3.374	-1.637	-1.736	-2.8	-0.7054	0.048493	0.098929	0.222656	0.131481	0.347165
O95154	AKR7A3	-2.993	-6.365	-5.191	-4.013	-3.052	-5.19	3.372	-2.198	-1.02	-0.05918	-2.196	0.165998	0.41425	0.710512	0.981866	0.345887
O95837	GNA14	0.118	-3.231	-1.997	-2.862	-2.503	0.2913	3.349	-2.115	-2.98	-2.621	0.1733	0.027798	0.034269	0.178747	0.026231	0.785868
P12955	PEPD	1.668	-1.669	-0.4712	-3.06	-4.956	-3.532	3.337	-2.139	-4.727	-6.624	-5.2	0.051319	0.156899	0.014814	0.003636	0.033441
Q13395	TARBP1	1.522	-1.807	-0.2294	-2.865	-0.6459	-0.5863	3.329	-1.751	-4.387	-2.168	-2.108	0.001495	0.073076	0.033397	0.029653	0.012284
B4DP64	LYPLA1	-2.107	-5.435	-0.757	-1.241	-1.698	-4.794	3.328	1.35	0.8663	0.4085	-2.687	0.055823	0.342677	0.542383	0.760884	0.14087
A0A7I2V512	RPL19	-3.172	-6.493	-6.369	-5.031	-5.876	-4.412	3.321	-3.197	-1.86	-2.704	-1.241	0.03069	0.096968	0.218532	0.072569	0.511277
F8WBZ6	CNOT9	-3.875	-7.187	-4.738	-6.243	-3.85	-4.686	3.312	-0.8639	-2.369	0.02444	-0.8112	0.014055	0.471805	0.047698	0.980544	0.530727
C9JYQ9	RPL22L1	0.1013	-3.209	-2.959	-0.476	-2.331	-1.229	3.31	-3.06	-0.5773	-2.433	-1.33	0.13464	0.021671	0.632014	0.23661	0.344285
J3KR12	J3KR12	-3.729	-7.034	-4.242	-4.602	-4.828	-4.518	3.305	-0.5134	-0.8734	-1.099	-0.7894	0.080316	0.797184	0.640022	0.527957	0.673789
A6ZKI3	RTL8C	-1.455	-4.745	-1.815	-2.297	-2.819	-1.98	3.29	-0.3598	-0.8416	-1.364	-0.5246	0.079353	0.340309	0.495124	0.270707	0.077113
O75487	GPC4	2.097	-1.176	-2.773	-2.953	-0.6895	1.805	3.273	-4.87	-5.05	-2.787	-0.2918	0.271503	0.166125	0.084986	0.28638	0.922501
A0A087WT95	ACOT2	0.8847	-2.341	3.623	-2.412	-4.981	2.75	3.226	2.738	-3.297	-5.866	1.866	0.039255	0.062257	0.112301	0.008529	0.200705
O75151	PHF2	3.087	-0.1153	3.346	0.3771	2.282	2.39	3.203	0.2582	-2.71	-0.8053	-0.6976	0.07451	0.757023	0.155046	0.434233	0.488949
A0A0B4J295	BOLA2-SMG1P6	-2.239	-5.434	-7.093	-4.47	-3.976	-6.163	3.196	-4.854	-2.231	-1.737	-3.924	0.078559	0.007987	0.279596	0.357015	0.020122
Q9BTC8	MTA3	-0.2856	-3.473	-5.221	1.377	-2.057	0.4198	3.188	-4.935	1.662	-1.772	0.7055	0.239114	0.048075	0.381459	0.509592	0.702515
B4DP31	PRPSAP1	0.5258	-2.629	1.589	1.35	-0.7591	1.278	3.155	1.063	0.824	-1.285	0.7517	0.146564	0.099668	0.051963	0.283667	0.130153
F5H7X1	PSMD9	-1.98	-5.123	-5.139	-5.143	-2.484	-5.54	3.143	-3.159	-3.163	-0.5042	-3.56	0.094996	0.081337	0.083275	0.772026	0.055225
Q93084	ATP2A3	-1.271	-4.412	-4.353	-2.333	-0.9334	-3.802	3.141	-3.082	-1.063	0.3373	-2.531	0.087864	0.146312	0.518147	0.808152	0.164543
R4GMY7	STXBP2	-2.948	-6.084	-2.068	-6.892	-6.787	-4.032	3.136	0.8793	-3.945	-3.839	-1.085	0.047532	0.465346	0.018497	0.020124	0.447472
Q9BTY7	HGH1	-0.09414	-3.224	-1.838	-3.72	-3.475	-2.077	3.13	-1.744	-3.626	-3.381	-1.983	0.017501	0.071361	0.016421	0.089679	0.035061
Q96S82	UBL7	-2.835	-5.961	-4.227	-5.093	-3.629	-5.207	3.125	-1.391	-2.257	-0.7935	-2.372	0.026694	0.07281	0.068659	0.240281	0.038431
Q96EY9	ADAT3	-0.9223	-4.042	-4.03	-5.317	-3.882	-4.411	3.119	-3.108	-4.395	-2.959	-3.488	0.048	0.018866	0.007521	0.113781	0.006535
Q15650	TRIP4	1.026	-2.084	-0.3758	-1.268	-0.8694	-0.542	3.11	-1.402	-2.294	-1.895	-1.568	0.08768	0.332996	0.110009	0.408711	0.287615
A0A087WWD4	NCAM1	0.3171	-2.784	-2.484	-1.925	-2.773	-1.204	3.101	-2.801	-2.242	-3.09	-1.521	0.037364	0.004499	0.010283	0.001431	0.13169
Q9Y536	PPIAL4A	-2.496	-5.596	-0.3583	-0.1451	-1.689	-1.207	3.1	2.138	2.351	0.8071	1.289	0.02357	0.048728	0.05432	0.535602	0.204821
P62834	RAP1A	0.1062	-2.994	-1.724	-2.422	-2.266	-1.392	3.1	-1.83	-2.528	-2.372	-1.498	0.100027	0.05347	0.221297	0.180914	0.215635
F8WAS3	NDUFA5	-0.3565	-3.442	-0.311	-3.73	-2.817	-1.081	3.086	0.04555	-3.373	-2.46	-0.7249	0.10407	0.834836	0.096393	0.084785	0.363894
Q04837	SSBP1	4.095	1.038	1.646	1.194	1.976	2.172	3.057	-2.449	-2.901	-2.119	-1.924	0.078913	0.033854	0.127474	0.152187	0.022932
P17568	NDUFB7	-4.336	-7.359	-5.671	-4.763	-6.269	-2.693	3.023	-1.335	-0.4271	-1.932	1.643	0.033768	0.352693	0.784698	0.124264	0.178933
P01893	HLA-H	-0.5228	-3.541	-1.559	-3.491	-0.128	-1.493	3.018	-1.037	-2.968	0.3948	-0.9707	0.039278	0.355733	0.046073	0.775636	0.576028
O00115	DNASE2	-0.7688	-3.777	-4.082	-2.154	-2.034	-2.015	3.008	-3.313	-1.385	-1.265	-1.247	0.129188	0.114757	0.460383	0.471898	0.466989
Q8TB52	FBXO30	-1.523	-4.524	-1.636	-5.367	-3.944	-4.882	3	-0.1125	-3.843	-2.42	-3.359	0.05524	0.845143	0.001551	0.10806	0.003288
A0A499FJL2	LARS2	-4.197	-7.186	-7.492	-5.561	-6.851	-5.854	2.989	-3.295	-1.364	-2.654	-1.656	0.028923	0.021532	0.28089	0.04612	0.236381
C9JAK5	ARF4	-1.745	-4.731	-6.735	-7.56	-6.16	-6.425	2.986	-4.99	-5.815	-4.415	-4.68	0.091302	0.01479	0.009573	0.02332	0.020413
H0Y6J8	MICALL1	1.601	-1.359	-1.236	-3.49	-0.8393	-1.082	2.96	-2.837	-5.091	-2.44	-2.683	0.183334	0.044784	0.00834	0.191875	0.055011
M0R0U3	PGLS	-2.085	-5.04	2.584	-6.871	-3.559	3.114	2.955	-0.3258	-4.786	-1.474	0.2038	0.243923	0.071436	0.071931	0.616635	0.114259
E9PRQ4	NDUFC2-KCTD14	-2.589	-5.537	-1.781	-5.514	-2.768	-3.762	2.948	0.8077	-2.925	-0.1793	-1.173	0.01061	0.284758	0.005483	0.87902	0.175485
Q53H82	LACTB2	-1.778	-4.723	-2.118	-2.864	-3.122	-2.127	2.945	-0.3396	-1.086	-1.344	-0.3483	0.096462	0.494486	0.467666	0.218379	0.800662
Q6ZXV5	TMTC3	2.326	-0.5904	-0.688	-1.05	-2.333	1.186	2.917	-3.014	-3.376	-4.659	-1.14	0.009979	0.005381	0.002495	0.011773	0.179361
O00560	SDCBP	-4.05	-6.963	-5.827	-5.822	-6.303	-5.846	2.913	-1.777	-1.772	-2.253	-1.796	0.066939	0.273803	0.279877	0.137781	0.280222
A0A7I2V3C5	CAMLG	-2.868	-5.779	-3.992	-4.685	-4.604	-3.798	2.911	-1.125	-1.817	-1.737	-0.9305	0.03395	0.268517	0.072537	0.159031	0.345592
Q8NHG8	ZNRF2	-3.543	-6.454	-2.724	-2.17	-4.391	-5.964	2.911	0.819	1.373	-0.8479	-2.421	0.035709	0.414591	0.200797	0.551813	0.089566
A0A087WV05	A0A087WV05	-2.096	-4.996	-1.994	-5.254	-1.507	-2.526	2.901	0.1016	-3.158	0.5886	-0.4304	0.042872	0.889478	0.067807	0.50035	0.582164
A0A2U3TZN6	CASK	0.8687	-2.005	0.8614	-1.276	-1.241	0.3131	2.874	-0.007299	-2.145	-2.11	-0.5557	0.057264	0.985326	0.114564	0.0284	0.215
Q9BU89	DOHH	-0.5528	-3.423	-1.917	-1.419	-1.59	-0.9054	2.87	-1.364	-0.8666	-1.037	-0.3526	0.000367	0.02758	0.358848	0.151856	0.301143
Q9BZE1	MRPL37	0.9512	-1.918	-0.7859	-0.6882	-0.2323	-1.296	2.869	-1.737	-1.639	-1.184	-2.247	0.099218	0.085802	0.135262	0.238744	0.132301
Q12769	NUP160	0.754	-2.112	0.519	-2.499	-0.8906	-1.783	2.866	-0.2349	-3.253	-1.645	-2.537	0.001155	0.649081	0.000559	0.077111	0.000522
Q96DB5	RMDN1	-1.881	-4.741	-5.482	-3.99	-6.504	-6.355	2.86	-3.601	-2.109	-4.624	-4.474	0.123135	0.011195	0.215045	0.005138	3.6e-05
F5GYK2	STRN4	0.9669	-1.888	-0.02756	-0.3686	0.2735	0.185	2.855	-0.9945	-1.335	-0.6934	-0.7819	0.046398	0.019358	0.086369	0.226956	0.223907
A0A2R8YER1	CHD4	-4.334	-7.173	-3.114	3.527	-5.849	-5.455	2.84	1.219	-0.5705	-1.516	-1.122	0.144085	0.54004	0.114376	0.401349	0.557655
P36507	MAP2K2	0.4997	-2.338	-0.4463	0.6868	-0.5001	-1.012	2.838	-0.946	0.1871	-0.9998	-1.512	0.12033	0.218513	0.74653	0.042784	0.049611
Q9NPI6	DCP1A	-1.371	-4.201	-5.043	-4.765	-3.383	-3.91	2.83	-3.673	-3.394	-2.012	-2.539	0.16153	0.064925	0.084106	0.254036	0.171338
E5RJ73	MRPS27	-2.23	-5.052	-4.973	-2.964	-3.408	-2.515	2.822	-2.743	-0.7343	-1.178	-0.2855	0.1491	0.143033	0.605296	0.498534	0.844211
Q09472	EP300	1.903	-0.9093	-1.211	-1.309	-1.737	-0.7132	2.813	-3.114	-3.212	-3.641	-2.617	0.035864	0.003321	0.004078	0.00124	0.022168
A0A6Q8PFK8	HSPB1	-3.24	-6.041	-5.542	-4.673	-4.96	-4.418	2.8	-2.302	-1.433	-1.72	-1.177	0.085774	0.082136	0.297719	0.333234	0.460213
P60763	RAC3	-1.786	-4.585	-5.039	-1.883	-2.417	-1.779	2.8	-3.253	-0.0969	-0.6312	0.007062	0.112553	0.035146	0.909164	0.456744	0.98366
Q13425	SNTB2	-0.3033	-3.1	-0.4078	-1.482	-4.854	-0.9884	2.797	-0.1045	-1.179	-4.55	-0.6851	0.049394	0.889892	0.026022	0.000409	0.671317
Q96GE9	DMAC1	-1.536	-4.327	-1.923	-6.498	-2.268	-2.178	2.791	-0.3868	-4.962	-0.7313	-0.6417	0.156058	0.433806	1.2e-05	0.589596	0.247166
A6NIC1	RTCA	0.02311	-2.768	-2.658	-1.448	-1.504	-0.8284	2.791	-2.681	-1.471	-1.527	-0.8515	0.154609	0.02363	0.023677	0.018053	0.044815
Q8IUE6	H2AC21	7.031	4.243	4.546	5.867	6.141	7.013	2.789	-2.485	-1.164	-0.8902	-0.01842	0.152059	0.182565	0.474385	0.572844	0.988957
P51784	USP11	-0.6651	-3.452	-2.845	-1.999	-4.109	-1.946	2.787	-2.18	-1.334	-3.444	-1.281	0.057217	0.003522	0.07869	0.009897	0.003619
Q86Y82	STX12	-1.069	-3.833	-0.7695	-2.458	-1.35	-3.018	2.764	0.2993	-1.389	-0.2814	-1.949	0.084866	0.614668	0.06463	0.786135	0.113912
G3V3T8	ATP6V1D	-2.014	-4.777	-3.684	-2.689	-3.535	-2.661	2.763	-1.669	-0.6744	-1.52	-0.6469	0.094175	0.1952	0.540984	0.319356	0.592579
A0A7P0TA58	EPHA7	0.1946	-2.567	-1.081	-2.368	-2.187	-2.865	2.762	-1.275	-2.563	-2.381	-3.059	0.070002	0.179499	0.053186	0.036496	0.07872
C9JJ19	MRPS34	-2.081	-4.84	-5.604	-5.529	-4.701	-5.989	2.759	-3.523	-3.448	-2.62	-3.909	0.214149	0.073915	0.041115	0.169859	0.037209
S4R3I5	NDUFA3	-1.11	-3.852	-0.2429	-4.472	-3.952	-1.192	2.742	0.8671	-3.362	-2.842	-0.08223	0.172993	0.251194	0.083555	0.091072	0.9101
Q8TC07	TBC1D15	-0.4568	-3.198	-1.459	-3.9	-2.364	-2.028	2.742	-1.003	-3.443	-1.908	-1.572	0.137637	0.361103	0.05661	0.182619	0.069874
A0A087WUM2	LDHAL6A	-0.9355	-3.675	-4.418	-2.546	-2.433	-2.764	2.74	-3.483	-1.61	-1.498	-1.829	0.278399	0.204571	0.528535	0.571845	0.477045
A6NMY6	ANXA2P2	0.3331	-2.4	-0.5607	-0.9557	-0.1888	-5.051	2.733	-0.8938	-1.289	-0.5219	-5.384	0.269575	0.479884	0.509077	0.735677	0.018247
P35270	SPR	-3.027	-5.757	-6.203	-5.345	-6.086	-2.056	2.73	-3.176	-2.318	-3.059	0.9709	0.170866	0.109541	0.195274	0.100983	0.623265
A0A3B3ITP2	LMBRD1	-3.692	-6.418	-6.869	-6.854	-5.469	-6.82	2.726	-3.177	-3.162	-1.777	-3.128	0.115351	0.074071	0.074953	0.309717	0.077108
Q9H0Q0	CYRIA	-0.6548	-3.38	-1.252	-1.245	-0.232	0.4863	2.725	-0.5968	-0.5903	0.4229	1.141	0.095814	0.492953	0.781817	0.606238	0.213993
M0R061	COPE	-2.787	-5.51	-6.879	-5.131	-6.19	-7.078	2.723	-4.092	-2.344	-3.403	-4.291	0.050595	0.000118	0.06478	0.003785	5.9e-05
P09769	FGR	1.856	-0.8541	-1.849	-1.827	0.4556	0.8988	2.71	-3.705	-3.683	-1.4	-0.957	0.161699	0.012806	0.080578	0.37865	0.338975
P22392	NME2	2.806	0.09541	1.89	2.278	2.169	3.103	2.71	-0.9156	-0.5279	-0.6367	0.2976	0.287315	0.268413	0.306547	0.315142	0.489873
O75145	PPFIA3	-2.278	-4.984	-1.511	-6.175	-5.171	-1.916	2.706	0.7679	-3.896	-2.892	0.3621	0.11381	0.605765	0.022222	0.089247	0.854155
Q8WXF0	SRSF12	-2.426	-5.121	-6.789	-4.196	-7.285	-4.269	2.696	-4.363	-1.77	-4.859	-1.843	0.033658	0.000399	0.212286	7.8e-05	0.181076
H3BPG5	RNPS1	-3.119	-5.804	-5.634	-6.832	-5.804	-5.073	2.685	-2.515	-3.713	-2.685	-1.954	0.05255	0.062002	0.00708	0.027795	0.107374
P53007	SLC25A1	1.785	-0.8932	2.965	2.965	2.298	1.825	2.678	1.18	1.18	0.5135	0.03998	0.284848	0.113455	0.250458	0.622238	0.970774
E9PFG7	OGDH	-0.02277	-2.695	0.51	-1.585	-1.496	1.195	2.672	0.5328	-1.562	-1.473	1.217	0.170711	0.450192	0.301272	0.29339	0.119452
H3BS02	BCKDK	1.794	-0.8757	-2.064	-0.7173	-0.624	-1.229	2.669	-3.857	-2.511	-2.418	-3.023	0.148453	0.03401	0.212186	0.142827	0.060259
U3KQ55	UBA2	1.307	-1.358	-0.7709	-0.3964	-0.7849	1.011	2.665	-2.078	-1.704	-2.092	-0.2961	0.126052	0.135514	0.178618	0.222421	0.698549
Q5GLZ8	HERC4	2.093	-0.5703	-1.675	0.1473	-2.795	1.035	2.663	-3.768	-1.945	-4.887	-1.058	0.035155	0.017736	0.078248	0.060311	0.347423
A0A7P0T943	FAM126A	-1.12	-3.782	-3.061	-5.606	-3.77	-5.572	2.662	-1.941	-4.486	-2.65	-4.453	0.266615	0.233992	0.00959	0.27196	0.009863
S4R3C4	SRSF11	-1.343	-3.996	0.3328	0.9282	0.1643	0.3102	2.653	1.675	2.271	1.507	1.653	0.220396	0.301707	0.182224	0.355274	0.319572
Q07960	ARHGAP1	-0.5097	-3.159	-2.212	-1.835	-3.072	-1.856	2.65	-1.702	-1.326	-2.563	-1.346	0.001178	0.004464	0.125073	0.093099	0.010262
F6M2K2	NCOA6	0.9635	-1.685	-3.094	0.9327	-0.8931	-1.668	2.648	-4.058	-0.03082	-1.857	-2.632	0.051508	0.026644	0.981323	0.28381	0.052441
P13929	ENO3	-0.7285	-3.375	-3.959	-3.463	-1.968	-1.78	2.647	-3.231	-2.735	-1.24	-1.051	0.102224	0.017964	0.083173	0.413695	0.30054
Q96QU8	XPO6	-0.5004	-3.145	-3.501	-3.279	-1.472	-4.147	2.644	-3.001	-2.779	-0.972	-3.647	0.252867	0.141094	0.100092	0.584909	0.04487
J3QRX9	COPRS	0.6209	-2.013	-0.3761	-0.1741	-0.7633	-2.38	2.634	-0.997	-0.795	-1.384	-3	0.196848	0.077814	0.455418	0.353141	0.062005
Q5T091	RER1	-1.337	-3.964	-5.429	-6.916	-4.299	-3.574	2.627	-4.092	-2.489	-2.962	-2.237	0.10579	0.005628	0.031721	0.024346	0.037097
Q13541	EIF4EBP1	-2.095	-4.721	-2.444	-5.631	-2.869	-3.303	2.625	-0.3481	-3.535	-0.7737	-1.208	0.059518	0.805304	0.009397	0.473358	0.410834
A0A804HJ93	DPM1	-2.231	-4.838	-1.188	-0.8025	-3.411	-3.28	2.606	1.043	1.429	-1.18	-1.049	0.267508	0.331005	0.159042	0.510171	0.280803
B8ZZS4	ANKZF1	0.4004	-2.197	-0.7054	-3.905	-0.9143	0.6013	2.598	-1.106	-4.305	-1.315	0.2009	0.054033	0.267747	0.024638	0.191477	0.894548
Q06546	GABPA	-3.248	-5.84	-2.135	-6.131	-1.669	-3.3	2.593	1.112	-2.884	1.579	-0.05279	0.063835	0.337445	0.040953	0.204723	0.972546
Q96RT1	ERBIN	-0.7609	-3.345	-0.8826	-1.597	-2.217	-1.333	2.584	-0.1217	-0.836	-1.456	-0.5725	0.140742	0.921633	0.548901	0.350537	0.623921
Q13015	MLLT11	-0.3299	-2.9	-2.578	0.2402	-0.4985	-1.37	2.57	-2.248	0.5701	-0.1685	-1.04	0.070611	0.184632	0.310473	0.827783	0.260619
Q8NI60	COQ8A	-0.005603	-2.572	-2.376	-2.34	-1.231	-1.707	2.566	-2.37	-2.334	-1.225	-1.702	0.071862	0.000285	0.000376	0.469934	0.002946
A0A2R8Y770	DDX3X	-2.247	-4.809	-4.33	-3.385	-3.503	-2.282	2.562	-2.083	-1.138	-1.256	-0.03478	0.166939	0.317309	0.558742	0.528514	0.984108
E7EMP6	HMCES	-2.846	-5.406	-6.915	-4.606	-5.597	-4.956	2.56	-4.069	-1.759	-2.75	-2.11	0.117651	0.015129	0.356461	0.11513	0.182129
Q8WWK9	CKAP2	2.137	-0.4158	1.289	1.373	0.3859	2.562	2.553	-0.8487	-0.7642	-1.752	0.4241	0.067136	0.414336	0.533778	0.123129	0.718849
B1AKC9	EPHB2	0.8054	-1.746	1.271	-0.3121	0.884	-1.524	2.552	0.4652	-1.117	0.07865	-2.329	0.121472	0.603685	0.236036	0.919524	0.13859
O60870	KIN	-1.887	-4.439	-4.691	-1.08	-2.324	-1.837	2.552	-2.804	0.8071	-0.4369	0.0502	0.027613	0.048262	0.32983	0.730541	0.946832
Q92947	GCDH	-1.182	-3.724	-2.834	-2.963	-2.524	-2.144	2.542	-1.652	-1.781	-1.343	-0.9621	0.133766	0.048748	0.029017	0.291113	0.030607
G3V317	CDK2	-1.701	-4.241	-3.226	-2.948	-2.336	-2.332	2.54	-1.525	-1.247	-0.6355	-0.6313	0.178722	0.276347	0.359146	0.630529	0.646469
A0A7I2YQW1	DNAJB1	-2.619	-5.159	-3.646	-0.1713	-4.111	-0.2397	2.54	-1.027	-0.1698	-1.492	-0.2382	0.228803	0.527414	0.552342	0.386393	0.578367
O00483	NDUFA4	1.532	-1.003	-1.798	-0.5614	-0.02749	-0.2019	2.535	-3.33	-2.093	-1.559	-1.734	0.098677	0.060657	0.005834	0.026537	0.100852
B8ZZP4	SCRN1	-2.773	-5.304	-4.124	-1.206	-3.948	-3.776	2.531	-1.351	1.567	-1.175	-1.003	0.068517	0.324865	0.212677	0.496582	0.533111
A0A804HK15	CTNND1	-3.241	-5.769	-2.397	-7.249	-3.404	-2.824	2.528	0.8439	-4.008	-0.1629	0.4167	0.045312	0.502887	0.007847	0.942199	0.833453
F8WB26	ZC3H15	-1.343	-3.866	-2.132	-2.541	-3.533	-2.461	2.522	-0.7886	-1.198	-2.19	-1.118	0.185528	0.34471	0.405169	0.180347	0.407922
A0A3B3IS11	A0A3B3IS11	7.062	4.567	4.582	5.897	6.164	7.034	2.495	-2.479	-1.165	-0.8981	-0.02759	0.168105	0.182812	0.473901	0.571464	0.983527
P16104	H2AX	7.062	4.567	4.582	5.897	6.164	7.034	2.495	-2.479	-1.165	-0.8981	-0.02759	0.168105	0.182812	0.473901	0.571464	0.983527
G3V507	PRMT5	-2.939	-5.428	-3.756	-4.842	-3.113	-2.192	2.489	-0.8174	-1.904	-0.1741	0.7468	0.187373	0.663808	0.302269	0.918462	0.601387
Q9UBX3	SLC25A10	-0.8274	-3.315	0.4357	-1.368	-1.168	0.4156	2.488	1.263	-0.5407	-0.341	1.243	0.177223	0.033405	0.556817	0.571048	0.007023
A0A804HK38	A0A804HK38	-2.177	-4.663	-4.881	-4.79	-3.98	-3.518	2.487	-2.705	-2.614	-1.804	-1.342	0.238384	0.21957	0.125094	0.282809	0.462208
J3KRF8	AURKB	0.2267	-2.26	-4.588	-2.095	-3.334	-4.679	2.487	-4.815	-2.322	-3.561	-4.905	0.135896	0.006616	0.067599	0.091848	0.015131
A0A087WYP7	TBL3	-3.771	-6.244	-7.689	-5.971	-6.053	-5.984	2.473	-3.918	-2.2	-2.282	-2.213	0.073386	0.054965	0.110128	0.087418	0.092228
P82970	HMGN5	0.593	-1.879	1.134	0.6537	-0.6712	-0.2758	2.472	0.5407	0.06071	-1.264	-0.8688	0.009173	0.421365	0.950337	0.135368	0.295398
Q9H9H4	VPS37B	-4.525	-6.986	-4.197	-6.943	-5.198	-6.807	2.461	0.3278	-2.418	-0.6734	-2.282	0.017847	0.731431	0.01646	0.523831	0.023733
E9PJK6	ASRGL1	-2.36	-4.818	-5.96	-6.842	-5.235	-4.954	2.458	-3.599	-4.482	-2.875	-2.594	0.131164	4.9e-05	0.000135	0.074432	0.008784
A0A1W2PP10	VPS35	0.1219	-2.324	-3.665	-2.598	-0.1963	-1.073	2.446	-3.787	-2.72	-0.3182	-1.195	0.234062	0.120775	0.203976	0.645269	0.478908
M0R3H9	BABAM1	-1.81	-4.249	-1.469	-1.707	-1.485	-2.424	2.439	0.3402	0.1025	0.3243	-0.6139	0.092297	0.384533	0.546302	0.057078	0.617622
A9QM74	KPNA7	-3.829	-6.252	-6.823	-6.517	-6.49	-6.72	2.423	-2.994	-2.688	-2.661	-2.891	0.110026	0.02764	0.035467	0.036879	0.030866
Q5JSH3	WDR44	-0.5415	-2.964	-1.552	-3.895	-1.12	-1.418	2.423	-1.011	-3.354	-0.5788	-0.8765	0.099355	0.45443	0.028798	0.641297	0.212296
Q9GZP9	DERL2	-3.271	-5.685	-3.656	-3.916	-4.122	-4.253	2.413	-0.385	-0.6448	-0.8511	-0.9813	0.146166	0.773693	0.706858	0.592446	0.622833
Q16720	ATP2B3	-1.442	-3.846	-4.172	-4.48	-3.464	-5.687	2.404	-2.73	-3.038	-2.022	-4.245	0.004135	0.000661	0.063061	0.035643	0.001015
Q92526	CCT6B	-1.365	-3.767	-2.868	-4.719	-3.38	-4.172	2.402	-1.504	-3.355	-2.015	-2.808	0.140878	0.029999	0.063677	0.02492	0.001628
A0A0A0MTJ6	CTNNA2	-4.697	-7.095	-5.182	-6.91	-6.799	-2.589	2.398	-0.4851	-2.213	-2.102	2.108	0.013429	0.59239	0.022323	0.026308	0.0495
Q9UBP6	METTL1	-1.95	-4.342	-3.729	-5.669	-2.468	-7.007	2.392	-1.778	-3.719	-0.5178	-5.057	0.082777	0.239174	0.008561	0.611386	0.002084
P54762	EPHB1	-0.6372	-3.018	-4.142	-2.339	-2.305	-2.39	2.381	-3.505	-1.702	-1.667	-1.753	0.209237	0.018842	0.069961	0.085078	0.207592
J3KMX2	SMARCD2	2.539	0.1579	-0.4479	-0.3451	1.639	0.1692	2.381	-2.987	-2.884	-0.9	-2.37	0.128732	0.056013	0.06175	0.499765	0.153506
A0A3B3IRI7	MOGS	-3.26	-5.634	-4.631	-4.78	-2.394	-1.95	2.375	-1.371	-1.521	0.8658	1.31	0.185989	0.342836	0.358299	0.619952	0.353549
Q8N5K1	CISD2	-1.012	-3.38	-1.805	-2.457	0.02311	-0.9806	2.368	-0.7925	-1.445	1.035	0.03159	0.148803	0.173563	0.360581	0.220831	0.942787
Q9H1R3	MYLK2	0.6119	-1.755	-5.631	-1.323	-3.959	-5.372	2.367	-6.243	-1.934	-4.571	-5.984	0.023189	<0.000001	0.056043	0.007772	0.002276
Q96J92	WNK4	-1.756	-4.12	-1.606	-6.255	-1.536	-2.729	2.364	0.1503	-4.499	0.2199	-0.9726	0.190028	0.92735	0.005961	0.871262	0.57842
F8WF50	RABL3	-2.243	-4.602	-2.672	-3.075	-3.179	-3.529	2.359	-0.4283	-0.8317	-0.9353	-1.286	0.115138	0.706693	0.633192	0.605117	0.306048
P62891	RPL39	0.5044	-1.852	-2.221	0.8825	-0.5227	-0.5319	2.356	-2.725	0.3781	-1.027	-1.036	0.294838	0.229758	0.799886	0.598017	0.580806
P62875	POLR2L	-0.6382	-2.993	-1.32	-2.241	-1.836	-0.6999	2.355	-0.6821	-1.603	-1.198	-0.06165	0.060447	0.305214	0.090821	0.14987	0.826159
Q9HC52	CBX8	-1.018	-3.366	-1.589	-3.198	-3.147	-2.48	2.348	-0.571	-2.18	-2.128	-1.461	0.129041	0.002459	0.097324	0.132158	0.23634
H0YNM1	GCHFR	-3.773	-6.117	-1.949	-4.59	-4.47	-2.214	2.343	1.825	-0.8161	-0.6966	1.56	0.019731	0.035567	0.517831	0.560906	0.062304
A0A804HIC8	HEXA	-2.097	-4.438	0.08689	-2.645	-4.841	0.613	2.341	-0.3794	-0.5486	-2.744	0.1468	0.062706	0.341635	0.62451	0.022032	0.684092
A0A2Q3DQE3	CAMK2G	1.704	-0.6352	0.9935	1.797	-0.1093	1.603	2.339	-0.7106	0.09323	-1.813	-0.1014	0.305067	0.373384	0.883575	0.367903	0.886437
Q6NSI4	RADX	2.208	-0.1311	1.825	1.188	1.021	2.094	2.339	-0.3826	-1.019	-1.186	-0.1133	0.001448	0.299417	0.05952	0.066665	0.791634
Q86U90	YRDC	-1.621	-3.949	-3.018	-4.253	-4.406	-2.425	2.328	-1.398	-2.632	-2.786	-0.8044	0.084041	0.306199	0.085943	0.07027	0.453811
K7EM43	FKBP10	0.4985	-1.814	1.241	0.4559	0.868	1.556	2.312	0.7425	-0.04266	0.3694	1.057	0.074726	0.431771	0.966513	0.692559	0.308232
Q59GN2	RPL39P5	0.5044	-1.803	-2.259	0.8825	-0.5227	-0.5319	2.307	-2.763	0.3781	-1.027	-1.036	0.297526	0.228355	0.799886	0.598017	0.580806
P61457	PCBD1	-1.296	-3.6	-0.6806	-6.406	-1.794	-2.07	2.304	0.6152	-5.11	-0.4986	-0.7739	0.137893	0.132404	0.002803	0.308658	0.154109
O15264	MAPK13	-0.6964	-2.988	-5.013	-2.055	-2.641	-1.074	2.292	-4.317	-1.358	-1.945	-0.3775	0.256894	0.02661	0.553285	0.373246	0.8322
Q96MW1	CCDC43	0.1139	-2.177	-2.188	-1.238	-0.4899	-0.7686	2.291	-2.302	-1.352	-0.6038	-0.8826	0.191163	0.090012	0.182221	0.518625	0.341583
A0A0A0MSI8	EXOC5	-1.608	-3.889	-2.575	-6.944	-3.75	-6.795	2.281	-1.089	-5.336	-2.143	-5.187	0.412868	0.094441	0.04028	0.427747	0.043456
Q9NZ08	ERAP1	-1.05	-3.319	-0.9747	-2.939	-1.583	-2.369	2.269	0.0752	-1.889	-0.5332	-1.319	0.331911	0.95317	0.297612	0.638822	0.464437
H0YK54	ZFAND6	-4.563	-6.831	-5.984	-6.831	-6.842	-6.642	2.268	-1.421	-2.268	-2.279	-2.079	0.077246	0.293116	0.076096	0.07514	0.094189
Q5QPR3	CDK11A	-2.024	-4.284	-1.077	-3.491	-3.993	-2.918	2.26	0.9467	-1.467	-1.969	-0.894	0.108413	0.039481	0.174926	0.175619	0.459936
F2Z2E2	IQGAP3	2.691	0.4336	-1.445	0.1192	-2.523	2.333	2.257	-4.136	-2.571	3.638	-0.3575	0.018243	0.001937	0.010107	0.005917	0.703409
A6NHK2	SNRPE	2.079	-0.1763	2.68	1.922	2.157	1.564	2.256	0.6011	-0.157	0.0775	-0.5156	0.366354	0.474759	0.829611	0.935085	0.536126
F8WEI7	LGALS1	2.534	0.2798	1.237	2.134	2.59	-0.2839	2.254	-1.297	-0.4	0.0563	-2.818	0.386035	0.17307	0.508813	0.895502	0.030964
Q15797	SMAD1	-3.754	-6.007	-3.104	-4.891	-2.994	-3.31	2.254	0.65	-1.137	0.7595	0.4441	0.092792	0.695559	0.319937	0.480988	0.735345
A0A7P0TB51	ACADM	-4.336	-6.586	-5.587	-6.944	-3.586	-4.711	2.25	-1.251	-2.609	0.7492	-0.3751	0.238053	0.53602	0.161675	0.723898	0.85613
P61970	NUTF2	2.017	-0.2294	0.5995	1.292	1.334	1.49	2.246	-1.417	-0.7242	-0.6826	-0.5263	0.257976	0.112805	0.280559	0.240017	0.265499
Q7Z7M0	MEGF8	2.477	0.2334	0.3149	1.36	1.106	2.194	2.244	-2.163	-1.118	-1.372	-0.2838	0.08911	0.026988	0.386131	0.349592	0.793578
A0A2R8Y606	RNASEH2A	-1.32	-3.555	-1.917	-2.684	-3.12	-1.528	2.235	-0.5969	-1.365	-1.801	-0.2079	0.093757	0.267063	0.261626	0.143782	0.510237
Q9Y5T5	USP16	1.248	-0.9857	1.552	-0.3773	0.02453	0.00482	2.233	0.3043	-1.625	-1.223	-1.243	0.129361	0.559029	0.209374	0.276531	0.319933
Q9Y247	FAM50B	-1.366	-3.591	-5.571	-5.943	-4.508	-5.98	2.225	-4.205	-4.576	-3.141	-4.613	0.020608	0.000219	0.000151	0.027267	0.000829
P35520	CBS	1.93	-0.2817	-0.2134	-0.2164	0.8742	0.6992	2.212	-2.144	-2.147	-1.056	-1.231	0.021088	0.023337	0.022215	0.237474	0.158857
Q9UQ88	CDK11A	-2.024	-4.229	-1.077	-3.487	-3.919	-2.934	2.205	0.9467	-1.462	-1.895	-0.9096	0.106977	0.039481	0.174384	0.17557	0.457857
F2Z2T2	XPA	-4.342	-6.537	-6.17	-6.836	-4.821	-6.416	2.195	-1.828	-2.494	-0.4788	-2.074	0.021067	0.08777	0.016562	0.660014	0.026177
F8VP57	EPHA5	-0.7066	-2.891	-4.623	-1.743	-2.304	-4.469	2.184	-3.917	-1.036	-1.598	-3.762	0.144663	0.020165	0.393705	0.279024	0.019889
K7EIU8	SMAD4	-0.4241	-2.597	-0.8354	-3.238	-3.116	-1.872	2.173	-0.4112	-2.814	-2.692	-1.448	0.005534	0.317975	0.036313	0.032719	0.104185
Q13485	SMAD4	-0.4241	-2.597	-0.8354	-3.238	-3.116	-1.872	2.173	-0.4112	-2.814	-2.692	-1.448	0.005534	0.317975	0.036313	0.032719	0.104185
O94808	GFPT2	-2.129	-4.297	-5.645	-3.986	-6.647	-6.601	2.168	-3.516	-1.856	-4.518	-4.472	0.329524	0.095262	0.345457	0.048013	0.050183
Q9Y2T7	YBX2	0.5763	-1.592	-2.435	-3.538	-0.03921	0.786	2.168	-3.011	-4.114	-0.6155	0.2098	0.054495	0.017495	0.00862	0.722027	0.901208
P03928	MT-ATP8	-0.7699	-2.935	-2.125	-1.832	-2.134	-1.598	2.165	-1.355	-1.062	-1.364	-0.8282	0.260685	0.088257	0.383982	0.375545	0.482316
Q9BYD6	MRPL1	-0.855	-3.015	-0.8372	-3.456	-3.577	0.6211	2.16	0.01784	-2.601	-2.722	1.476	0.053253	0.97117	0.053308	0.042838	0.067976
J3KTJ5	PSMD12	-0.6178	-2.772	-2.499	-2.546	-2.168	-1.401	2.154	-1.881	-1.929	-1.55	-0.7837	0.155038	0.167479	0.134173	0.175085	0.180487
Q8N4P3	HDDC3	-1.708	-3.856	-2.875	-2.266	-2.07	-2.675	2.148	-1.166	-0.5579	-0.3618	-0.967	0.22891	0.191602	0.683568	0.807549	0.407537
Q32MZ4	LRRFIP1	2.429	0.2813	0.3124	0.4639	2.486	2.018	2.148	-2.117	-1.966	0.05629	-0.4118	0.191394	0.20003	0.224921	0.976334	0.834624
Q14344	GNA13	-2.487	-4.631	-1.22	-3.467	-5.09	-3.537	2.143	1.267	-0.9792	-2.602	-1.05	0.147374	0.101481	0.263099	0.046475	0.374215
P42696	RBM34	-0.009604	-2.153	-0.912	-3.542	-0.7948	-0.7123	2.143	-0.9024	-3.532	-0.7852	-0.7027	0.14164	0.096403	0.021617	0.121127	0.240504
A0A804HJ83	RAB18	-4.2	-6.342	-6.598	-6.717	-6.127	-5.331	2.142	-2.397	-2.517	-1.927	-1.131	0.036067	0.022011	0.018193	0.054861	0.251156
I3L387	PLK1	-4.174	-6.316	-6.629	-5.836	-5.93	-5.522	2.141	-2.455	-1.661	-1.755	-1.348	0.212941	0.10909	0.321986	0.317451	0.480122
P62745	RHOB	-2.891	-5.032	-4.999	-3.815	-4.369	-3.101	2.141	-2.108	-0.9242	-1.478	-0.2096	0.106515	0.115431	0.289375	0.105205	0.745915
Q96E92	PRKAA1	-2.688	-4.827	-3.994	-2.825	-3.665	-3.094	2.139	-1.306	-0.1366	-0.9776	-0.4064	0.036859	0.176678	0.856035	0.121102	0.449995
Q9BTX1	NDC1	-2.045	-4.182	-2.691	-1.323	-4.572	-4.375	2.138	-0.6464	0.7222	-2.527	-2.33	0.231568	0.69728	0.635462	0.220193	0.197661
K7EQ43	UBL5	-2.062	-4.2	-4.226	-3.012	-2.24	-2.41	2.138	-2.164	-0.9506	-0.1788	-0.3489	0.085909	0.183249	0.425734	0.721321	0.415663
Q9UPP1	PHF8	-4.698	-6.827	-1.649	-4.546	-3.744	-4.268	2.129	3.049	0.1521	0.9541	0.4299	0.139239	0.074274	0.934176	0.594232	0.803162
B4DI28	PTBP2	-2.613	-4.739	-4.443	-4.121	-5.251	-2.688	2.126	-1.83	-1.509	-2.638	-0.07534	0.179137	0.057596	0.22385	0.03444	0.923046
Q9UJW0	DCTN4	3.717	1.594	2.635	1.797	2.425	2.722	2.124	-1.082	-1.92	-1.293	-0.9951	0.139162	0.015665	0.002757	0.033164	0.083801
E9PLD3	E9PLD3	-4.813	-6.934	-3.186	-6.811	-6.827	-4.73	2.122	1.627	-1.998	-2.014	0.08242	0.030893	0.124844	0.032266	0.030908	0.956623
E9PH82	FAM98A	-0.7301	-2.851	0.04232	-1.961	-1.032	-0.5297	2.121	0.7724	-1.231	-0.3017	0.2004	0.278233	0.43765	0.492849	0.811166	0.885711
E5RIE1	PBK	-1.795	-3.904	-0.4613	-1.603	-1.468	-0.992	2.109	1.334	0.192	0.3271	0.8032	0.171761	0.00918	0.633661	0.367908	0.081137
A0A7I2YQQ9	WDR26	-2.736	-4.839	-6.59	-5.054	-4.814	-5.633	2.103	-3.853	-2.318	-2.078	-2.897	0.096884	0.021375	0.139047	0.187404	0.061084
H7BXS4	CAMK2B	-3.882	-5.985	-1.445	-3.69	-2.895	-1.05	2.102	2.438	0.1925	0.987	2.833	0.190075	0.098705	0.883201	0.571256	0.168331
Q9NQH7	XPNPEP3	-1.407	-3.506	-2.5	-1.876	-1.406	-1.206	2.099	-1.093	-0.4685	0.001354	0.2016	0.093644	0.272252	0.421247	0.998195	0.779273
P51398	DAP3	-1.359	-3.454	-1.177	-2.724	-1.768	-2.716	2.095	0.1817	-1.365	-0.4093	-1.357	0.071016	0.605629	0.04612	0.654297	0.200532
Q9NQS1	AVEN	-3.177	-5.271	-2.163	-1.864	-5.278	-6.621	2.094	1.013	1.313	-2.101	-3.444	0.169792	0.43954	0.298105	0.198748	0.028895
Q07666	KHDRBS1	1.189	-0.905	1.046	-0.305	0.4919	0.2193	2.094	-0.1438	-1.494	-0.6975	-0.9702	0.253869	0.872575	0.392055	0.559434	0.532677
A0A6Q8PGH5	KHDRBS2	-0.1658	-2.258	-1.763	-1.127	-1.64	-0.7846	2.092	-1.597	-0.9615	-1.474	-0.6188	0.36755	0.469733	0.675899	0.535293	0.783578
Q15018	ABRAXAS2	-1.665	-3.746	-2.441	-2.295	-3.125	-1.983	2.081	-0.7756	-0.6299	-1.46	-0.3183	0.110471	0.217337	0.477518	0.279029	0.584013
M0R0N4	AP2S1	-1.367	-3.447	-2.095	-1.464	-2.998	-4.015	2.08	-0.7281	-0.0969	-1.631	-2.648	0.123954	0.369422	0.891841	0.2213	0.104303
P82921	MRPS21	-0.3106	-2.389	-3.465	-2.414	-4.185	-2.973	2.079	-3.154	-2.103	-3.875	-2.662	0.217725	0.060151	0.342177	0.020678	0.076437
P36543	ATP6V1E1	0.7551	-1.323	-0.5706	-0.2042	0.3108	-0.08039	2.078	-1.326	-0.9593	-0.4443	-0.8355	0.052189	0.220916	0.180708	0.420202	0.330286
Q92542	NCSTN	0.07484	-1.994	0.9818	1.712	0.3255	0.6151	2.069	0.9069	1.638	0.2506	0.5403	0.304462	0.126708	0.023469	0.77214	0.23802
Q8NAV1	PRPF38A	0.8286	-1.232	-4.431	-2.387	-2.028	-0.9743	2.06	-5.26	-3.216	-2.857	-1.803	0.022996	0.002735	0.057842	0.002985	0.055294
B7Z4B8	HNRNPUL1	-3.529	-5.588	-6.146	-4.787	-4.088	-5.584	2.059	-2.617	-1.258	-0.5583	-2.055	0.109159	0.034936	0.339448	0.605497	0.094712
P16220	CREB1	-4.077	-6.133	-5.829	-5.514	-5.145	-5.696	2.056	-1.752	-1.437	-1.068	-1.619	0.190961	0.200931	0.290425	0.428714	0.244576
Q13547	HDAC1	-0.9071	-2.953	-0.5361	-2.215	-2.927	-1.461	2.046	0.371	-1.308	-2.019	-0.554	0.117267	0.278262	0.128337	0.002264	0.317732
P30154	PPP2R1B	-1.347	-3.394	-3.499	-1.872	-2.305	-2.824	2.046	-2.151	-0.5246	-0.9582	-1.476	0.041629	0.060221	0.525011	0.492656	0.184154
P54707	ATP12A	-3.174	-5.214	-6.361	-5.83	-2.476	-6.101	2.04	-3.187	-2.656	0.6975	-2.928	0.119106	0.014114	0.008731	0.760316	0.075125
P46199	MTIF2	-1.488	-3.526	-1.459	-3.127	-2.821	-2.42	2.038	0.02829	-1.639	-1.333	-0.9324	0.199627	0.89881	0.27549	0.279919	0.460982
Q00534	CDK6	-1.749	-3.782	-2.443	-1.535	-2.071	-0.9183	2.033	-0.6946	0.2136	-0.3224	0.8303	0.176965	0.245971	0.721003	0.735475	0.208215
O15127	SCAMP2	-0.4363	-2.47	-2.741	-1.59	-1.262	-3.613	2.033	-2.304	-1.154	-0.826	-3.177	0.139131	0.177819	0.361372	0.415567	0.071511
P41219	PRPH	-1.165	-3.195	-1.287	-0.08415	-2.303	-2.958	2.03	-0.1221	1.081	-1.138	-1.793	0.05884	0.886649	0.182108	0.324831	0.167037
E9PB61	ALYREF	-2.874	-4.896	-2.225	-3.542	-2.142	-3.666	2.022	0.6491	-0.6676	0.7327	-0.7919	0.270799	0.705028	0.649664	0.690842	0.662056
A8K968	EPB41L3	-2.034	-4.054	-2.937	-3.981	-4.689	-3.93	2.021	-0.9033	-1.948	-2.655	-1.896	0.112848	0.012097	0.078752	0.057981	0.0752
F8WDN2	TXN2	-1.296	-3.315	-2.068	-2.861	-1.672	-2.137	2.019	-0.7716	-1.565	-0.3755	-0.8409	0.025435	0.46331	0.268376	0.739696	0.273852
Q6ZN17	LIN28B	-1.805	-3.813	-5.142	-3.736	-2.779	-2.701	2.009	-3.338	-1.932	-0.9741	-0.8968	0.209929	0.04699	0.193383	0.380724	0.364919
P48730	CSNK1D	1.68	-0.3235	-0.2415	-0.06348	-0.6	0.9234	2.004	-1.922	-1.744	-2.28	-0.757	0.067069	0.090354	0.222547	0.060333	0.471101
Q16352	INA	1.445	-0.5555	-1.871	-2.262	1.31	-0.1483	2	-3.315	-3.707	-0.1344	-1.593	0.187919	0.114152	0.025304	0.927822	0.309804
Q9UHR4	BAIAP2L1	-0.6791	-2.679	-1.592	-3.196	-1.189	-1.321	1.999	-0.9133	-2.517	-0.5096	-0.6416	0.259899	0.350438	0.211158	0.593024	0.288589
P14635	CCNB1	2.875	0.8758	2.402	0.6207	1.129	0.7925	1.999	-0.4731	-2.254	-1.746	-2.082	0.063527	0.502795	0.011081	0.105248	0.141044
A0A1W2PR46	GFAP	-1.035	-3.03	-2.505	-2.19	-3.164	-0.9582	1.995	-1.47	-1.155	-2.129	0.07712	0.015205	0.038788	0.126927	0.055029	0.918622
E7EPW2	MRPS25	-2.96	-4.956	-5.648	-3.544	-3.788	-3.217	1.995	-2.688	-0.5839	-0.828	-0.2571	0.096321	0.022587	0.543802	0.430518	0.764327
Q13153	PAK1	-0.7662	-2.761	0.8951	0.1526	-1.383	-1.96	1.994	1.661	0.9188	-0.6163	-1.194	0.249595	0.185308	0.425208	0.529842	0.316323
Q96K17	BTF3L4	3.224	1.239	2.72	3.362	3.412	2.828	1.985	-0.5047	0.1373	0.1875	-0.3967	0.37541	0.404943	0.798138	0.783181	0.539221
F8WBJ6	PNO1	-0.4233	-2.408	-1.494	-1.649	0.08242	-2.191	1.985	-1.07	-1.226	0.5057	-1.768	0.19508	0.495696	0.253821	0.49629	0.135521
Q13228	SELENBP1	-0.5649	-2.545	-2.549	-3.157	-2.378	-1.576	1.98	-1.984	-2.592	-1.813	-1.011	0.054053	0.03452	0.080972	0.076907	0.139122
Q07002	CDK18	0.7105	-1.261	-0.07685	-1.684	-1.546	0.3661	1.971	-0.7873	-2.394	-2.257	-0.3444	0.102845	0.542163	0.0438	0.059184	0.67025
E9PN57	ZNRD2	-2.705	-4.674	-1.589	-2.498	-0.8837	-1.441	1.969	-0.3894	-1.298	0.3161	-0.2409	0.275744	0.331971	0.037758	0.584161	0.621278
Q92541	RTF1	-0.3322	-2.301	-0.3482	-1.28	-0.7916	-0.8432	1.968	-0.01598	-0.9481	-0.4595	-0.511	0.073977	0.961044	0.25923	0.194184	0.253182
O95373	IPO7	2.996	1.032	1.228	2.098	2.942	1.725	1.964	-1.768	-0.8984	-0.054	-1.272	0.18109	0.027942	0.26368	0.938089	0.126201
E9PJX5	BLK	-4.989	-6.944	-6.355	-6.735	-6.363	-6.901	1.956	-1.367	-1.746	-1.375	-1.913	0.102766	0.224655	0.130253	0.222911	0.105758
Q6QNY0	BLOC1S3	-1.389	-3.343	-4.652	-3.598	-4.53	-2.352	1.954	-3.263	-2.209	-3.14	-0.9625	0.29076	0.136722	0.248768	0.147578	0.562837
Q92665	MRPS31	-0.08675	-2.036	-1.44	-0.5137	-0.5943	-0.1366	1.949	-1.353	-0.427	-0.5075	-0.04987	0.004564	0.233752	0.554577	0.254335	0.921712
D9J307	HLA-B	-0.929	-2.875	-2.157	-2.416	-0.6071	-1.777	1.946	-1.227	-1.487	0.3219	-0.8475	0.266467	0.368812	0.200248	0.612009	0.442066
F8VS66	TUBA1C	-2.691	-4.632	-4.815	-3.21	-3.295	-6.017	1.94	-2.124	-0.5188	-0.6036	-3.325	0.401146	0.266477	0.802968	0.755968	0.070164
Q96EC8	YIPF6	-2.868	-4.805	-4.499	-3.502	-3.129	-2.581	1.937	-1.631	-0.6337	-0.2608	0.2874	0.269874	0.330127	0.681265	0.858177	0.847859
A0A494C1B8	TPP2	-2.206	-4.135	-2.193	-0.788	1.842	-0.08635	1.929	0.01329	-1.649	0.9812	-0.9472	0.103387	0.97697	0.025516	0.031863	0.095651
Q9Y278	HS3ST2	0.8585	-1.07	-0.3857	-0.5766	-0.4394	0.2364	1.928	-1.244	-1.435	-1.298	-0.6221	0.115239	0.196129	0.071754	0.010882	0.336462
A0A087WTP2	FDPS	-4.09	-6.017	-2.299	-5.229	-1.367	-4.456	1.927	1.791	-1.139	2.723	-0.3667	0.211691	0.194272	0.467941	0.197936	0.804299
Q9NP97	DYNLRB1	2.309	0.3852	1.909	2.022	2.163	2.03	1.924	-0.4007	-0.2877	-0.1468	-0.2795	0.18463	0.212807	0.541709	0.659371	0.225572
J3QQY2	TMCO1	-4.221	-6.144	-6.076	-5.627	-2.369	-5.909	1.922	-1.855	-1.406	1.853	-1.688	0.136259	0.103461	0.224851	0.135065	0.263498
Q16611	BAK1	-4.394	-6.314	-6.054	-5.409	-4.123	-6.781	1.92	-1.66	-1.015	0.2709	-2.387	0.174581	0.162339	0.375363	0.850974	0.038494
O95989	NUDT3	-2.52	-4.437	-3.196	-5.364	-2.556	-4.324	1.917	-0.6761	-2.844	-0.03593	-1.804	0.246021	0.218294	0.010168	0.958799	0.002269
K7EJ37	EXOSC10	-2.086	-3.999	-4.008	-4.998	-2.202	-5.81	1.913	-1.922	-2.912	-0.1157	-3.724	0.220937	0.103027	0.082698	0.689964	0.023663
P54868	HMGCS2	-0.3045	-2.217	-4.803	-2.774	-2.359	0.0937	1.912	-4.498	-2.47	-2.054	0.3982	0.090425	0.051533	0.134409	0.35583	0.805677
Q8NB46	ANKRD52	-1.47	-3.376	-3.454	-1.887	-1.346	-1.462	1.906	-1.984	-0.4167	0.1245	0.00796	0.015132	0.008443	0.597983	0.928476	0.992671
Q9Y4P8	WIPI2	-1.492	-3.394	1.496	0.7357	-0.9702	-1.446	1.901	2.988	2.228	0.5222	0.04679	0.490754	0.248935	0.355396	0.8127	0.986477
Q9Y3C4	TPRKB	-1.927	-3.825	-2.14	-3.418	-3.318	-2.822	1.898	-0.2136	-1.492	-1.391	-0.8953	0.012858	0.639022	0.028217	0.2606	0.257186
Q9BSC4	NOL10	-1.754	-3.649	-3.468	-1.542	-3.517	-1.937	1.895	-1.714	0.2125	-1.763	-0.1834	0.220732	0.050977	0.753959	0.124919	0.900774
A0A5K1VW55	ASCC1	0.489	-1.403	0.8796	-1.639	-2.022	-0.6607	1.892	0.3906	-2.128	-2.511	-1.15	0.302898	0.651681	0.304372	0.031592	0.520039
B8ZZQ6	PTMA	5.81	3.918	4.59	4.758	5.112	5.885	1.892	-1.22	-1.052	-0.6976	0.07494	0.095899	0.208544	0.374492	0.2922	0.906122
Q96HY7	DHTKD1	2.675	0.789	-2.219	-0.09629	-1.007	0.428	1.886	-4.893	-2.771	-3.682	-2.247	0.197388	0.023711	0.107623	0.06289	0.284503
Q6PJG6	BRAT1	-2.183	-4.067	-1.565	-2.418	-1.933	-3.364	1.885	0.6176	-0.2357	0.2496	-1.181	0.120282	0.109309	0.866556	0.598542	0.252725
C9J634	PDHB	-3.898	-5.781	-5.212	-4.321	-4.098	-5.643	1.883	-1.313	-0.4231	-0.1996	-1.744	0.196177	0.442797	0.74392	0.878726	0.231543
P61011	SRP54	-3.538	-5.417	-6.738	-5.87	-5.302	-3.413	1.879	-3.201	-2.333	-1.764	0.125	0.229707	0.001993	0.020333	0.125661	0.904455
Q9UHA4	LAMTOR3	-1.502	-3.379	-1.37	-3.629	-1.27	-2.097	1.878	0.1318	-2.127	0.2313	-0.5954	0.126501	0.82996	0.124773	0.628074	0.446486
J3KSG2	SPECC1	-4.716	-6.594	-1.363	-2.145	-6.286	-1.544	1.878	3.353	2.572	-1.57	3.172	0.24528	0.073816	0.197301	0.332047	0.082584
B4DGE1	AP1G1	-4.988	-6.865	-6.106	-6.179	-6.506	-6.144	1.877	-1.118	-1.192	-1.518	-1.156	0.034411	0.166028	0.249992	0.067919	0.222512
C9J1V9	EEF1E1-BLOC1S5	0.2704	-1.597	1.528	-2.176	1.708	0.6759	1.867	1.258	-2.446	1.437	0.4055	0.206426	0.117554	0.05648	0.085462	0.66835
Q96C19	EFHD2	0.2265	-1.64	-5.23	-2.97	-2.44	-3.022	1.867	-5.457	-3.197	-2.667	-3.248	0.344893	0.027144	0.052193	0.005263	0.037302
Q9Y5Z4	HEBP2	-1.032	-2.897	-1.395	-1.518	-1.308	-1.04	1.865	-0.3637	-0.4866	-0.2764	-0.008732	0.137863	0.330398	0.234333	0.510629	0.983718
P51948	MNAT1	-3.85	-5.714	-5.255	-4.681	-4.417	-6.616	1.864	-1.405	-0.831	-0.5674	-2.766	0.196117	0.140534	0.443273	0.657274	0.013814
F8WDN7	SACM1L	-0.2489	-2.112	-0.8601	-2.384	-1.578	-1.822	1.863	-0.6112	-2.135	-1.329	-1.573	0.246705	0.036404	0.00281	0.150741	0.000343
A0A0B4J281	GMPR2	-5.125	-6.985	-6.089	-4.591	-6.811	-6.796	1.86	-0.9642	0.5343	-1.686	-1.671	0.088311	0.341449	0.650083	0.104425	0.106725
S4R457	HNRNPK	2.391	0.5331	2.204	2.056	2.31	2.514	1.858	-0.1873	-0.3344	-0.0804	0.1235	0.370999	0.580716	0.46701	0.733206	0.605379
Q58FF7	HSP90AB3P	-5.29	-7.145	-2.724	-5.668	-3.983	-7.352	1.854	2.566	-0.3778	1.307	-2.062	0.182384	0.085638	0.807909	0.46613	0.145567
F5H658	DHX8	-0.8342	-2.682	-1.79	-1.963	-1.232	-2.131	1.848	-0.9559	-1.128	-0.3973	-1.297	0.240029	0.064878	0.407132	0.626759	0.105365
P17661	DES	-3.214	-5.06	-2.407	-6.778	-1.207	-4.377	1.846	0.8077	-3.564	2.008	-1.163	0.260492	0.472351	0.009861	0.355105	0.431019
Q8N142	ADSS1	-4.764	-6.609	-0.9884	-5.783	-4.472	-2.924	1.845	3.776	-1.019	0.2924	1.841	0.140895	0.017485	0.412395	0.855044	0.253128
P06239	LCK	-0.8846	-2.725	-1.021	-2.962	-3.885	-4.608	1.84	-0.1362	-2.077	-3.001	-3.724	0.238158	0.796292	0.169244	0.038051	0.001013
A0A2R8YCI2	HARS1	-5.31	-7.147	-2.772	-5.953	-5.815	-6.89	1.837	2.538	-0.6431	-0.5048	-1.58	0.2485	0.198279	0.677149	0.750955	0.304965
A0A804HJ86	UBA5	0.4837	-1.353	-1.823	-1.874	-1.301	-1.302	1.837	-2.307	-2.358	-1.59	-1.786	0.142477	0.001512	0.041778	0.231571	0.00929
Q9NS69	TOMM22	-4.382	-6.218	-4.328	-3.949	-4.006	-3.857	1.836	0.054	0.4332	0.3768	0.5255	0.091415	0.972277	0.737317	0.670757	0.428158
B9EGQ5	WIZ	-0.4955	-2.328	-1.655	-2.916	-1.816	-2.42	1.832	-1.159	-2.421	-1.321	-1.925	0.230391	0.120432	0.142114	0.25445	0.015029
E9PFD4	BZW2	1.456	-0.3732	-0.5909	0.3176	0.2206	-1.433	1.829	-2.047	-1.139	-1.236	-2.889	0.25644	0.174229	0.337896	0.353634	0.028583
Q9C005	DPY30	-1.554	-3.383	-0.3414	-0.2036	-3.447	-0.6567	1.829	1.213	1.35	-1.893	0.8973	0.380282	0.09369	0.098348	0.265046	0.21162
Q9P1U0	POLR1H	-5.292	-7.117	-3.421	-6.922	-4.705	-4.84	1.825	1.871	-1.63	0.5865	0.4514	0.19102	0.330552	0.225438	0.768293	0.767675
O43929	ORC4	-0.984	-2.804	-0.6601	-0.2146	-0.8159	-0.485	1.82	0.3239	0.7694	0.1682	0.499	0.094828	0.569249	0.349705	0.724965	0.017629
Q969E2	SCAMP4	-2.923	-4.74	-6.473	-4.222	-6.3	-6.644	1.817	-3.55	-1.299	-3.377	-3.721	0.108901	4.8e-05	0.209488	0.01555	0.000441
Q92917	GPKOW	1.983	0.167	0.8367	0.6832	0.1645	1.008	1.816	-1.146	-1.3	-1.818	-0.975	0.075099	0.097311	0.074137	0.022811	0.158633
B7ZAP0	RABGAP1L	-2.397	-4.213	-4.698	-3.352	-3.072	-1.65	1.815	-2.301	-0.9547	-0.6748	0.7475	0.318906	0.209503	0.577381	0.701707	0.59561
O75925	PIAS1	-1.524	-3.332	-0.01781	-0.5638	-1.321	-0.5114	1.808	1.506	0.9599	0.2026	1.012	0.223112	0.161933	0.346006	0.858219	0.294718
P0CG38	POTEI	-2.745	-4.552	-2.375	-3.25	-3.767	-3.054	1.808	0.3697	-0.505	-1.022	-0.3088	0.36708	0.808734	0.757142	0.510212	0.856045
Q9NX24	NHP2	-0.6302	-2.435	-2.174	0.1056	-2.797	-0.2331	1.805	-0.9885	1.291	-2.166	0.3971	0.269684	0.363469	0.112387	0.134624	0.667591
Q9HD15	SRA1	-0.7912	-2.595	0.01219	-1.031	-0.6188	-1.996	1.804	0.8034	-0.2402	0.1724	-1.204	0.044611	0.136965	0.618805	0.706863	0.336629
Q16774	GUK1	0.3143	-1.486	-0.1304	0.5782	0.7262	-0.7752	1.8	-0.4447	0.2638	0.4119	-1.09	0.207027	0.594199	0.758157	0.683177	0.253054
P12931	SRC	-0.7441	-2.543	-5.669	-3.156	-3.433	-4.29	1.799	-4.925	-2.412	-2.689	-3.546	0.456576	0.066466	0.247403	0.302493	0.156941
F8VSD4	UBE2N	0.2792	-1.519	1.648	-1.76	0.06463	1.334	1.799	1.369	-2.039	-0.2146	1.055	0.168741	0.013173	0.15366	0.794571	0.083113
O43324	EEF1E1	0.533	-1.262	1.602	-0.7246	1.769	0.9479	1.795	1.069	-1.258	1.236	0.4149	0.203683	0.138803	0.098775	0.100477	0.612071
F5GWW2	LDHA	-5.291	-7.081	-6.8	-6.331	-6.99	-7.223	1.79	-1.509	-1.041	-1.699	-1.932	0.262876	0.328326	0.502596	0.279247	0.230133
Q86SE5	RALYL	-5.388	-7.176	-5.176	-5.651	-5.388	-5.605	1.788	0.2122	-0.2627	0.000258	-0.2169	0.142905	0.853393	0.833497	0.999823	0.862305
Q6WKZ4	RAB11FIP1	-0.9146	-2.701	-0.6393	-2.771	-1.347	-3.423	1.787	0.2753	-1.857	-0.4324	-2.508	0.20758	0.53349	0.275225	0.516126	0.043516
P62633	CNBP	0.198	-1.586	-0.04016	-0.732	-1.109	0.3583	1.784	-0.2382	-0.93	-1.307	0.1603	0.295345	0.331572	0.431438	0.429532	0.287154
Q9Y3E7	CHMP3	-1.617	-3.396	-3.438	-3.677	-0.7568	-2.154	1.779	-1.82	-2.06	0.8606	-0.5366	0.315053	0.372223	0.303741	0.583116	0.741507
Q9NRX2	MRPL17	1.445	-0.3336	-0.3397	-0.6709	-1.1	-0.3752	1.778	-1.784	-2.115	-2.545	-1.82	0.211137	0.009689	0.0062	0.001562	0.008644
P11137	MAP2	1.079	-0.6976	-1.024	-0.3273	0.04557	0.1529	1.777	-2.104	-1.407	-1.034	-0.9266	0.023526	0.010332	0.134042	0.337322	0.16962
Q9UBB5	MBD2	-3.584	-5.359	-0.4736	-3.022	-2.892	-3.534	1.775	3.11	0.5616	0.6915	0.04948	0.230071	0.001397	0.417622	0.142596	0.970163
Q9Y4I1	MYO5A	1.318	-0.4575	-0.05472	-0.2313	0.4352	0.7322	1.775	-1.372	-1.549	-0.8825	-0.5856	0.045042	0.129116	0.02546	0.318149	0.444939
A0A2R8YGD1	TPP1	-5.071	-6.845	-6.675	-5.615	-6.9	-6.777	1.774	-1.604	-0.5436	-1.829	-1.706	0.203706	0.040604	0.630031	0.028644	0.03555
Q2VIQ3	KIF4B	2.089	0.3166	2.241	-0.5462	0.6648	2.039	1.773	0.152	-2.636	-1.425	-0.05	0.142285	0.241853	0.019729	0.260035	0.807081
A0A7I2YQ74	UGP2	-3.866	-5.638	1.808	-6.446	2.024	-3.034	1.772	-0.8204	-2.579	-0.6046	0.8323	0.205664	0.119613	0.03382	0.266494	0.429748
P04080	CSTB	-1.187	-2.958	0.01857	-1.075	-1.962	-2.07	1.771	1.206	0.112	-0.775	-0.8831	0.323563	0.137399	0.925182	0.534685	0.543764
O00217	NDUFS8	0.3935	-1.37	1.69	-3.786	-0.3324	0.4972	1.764	1.296	-4.179	-0.726	0.1036	0.28257	0.262021	0.011406	0.655412	0.937815
E5RHP0	NME1	6.18	4.415	5.229	5.48	5.837	5.711	1.764	-0.9508	-0.6995	-0.343	-0.4689	0.144118	0.029099	0.036393	0.062163	0.016887
P15927	RPA2	4.733	2.972	5.763	4.635	4.058	2.236	1.761	1.03	-0.09811	-0.6752	-2.497	0.021507	0.222679	0.921949	0.538549	0.006619
E9PK91	BCLAF1	-4.221	-5.981	-5.06	-3.93	-5.339	-2.71	1.76	-0.8389	0.2913	-1.118	1.511	0.174097	0.537471	0.844514	0.352393	0.260868
P10109	FDX1	1.098	-0.6622	-1.053	-1.259	-0.8877	0.09679	1.76	-2.151	-2.357	-1.985	-1.001	0.006787	0.006077	0.055754	0.008619	0.002326
Q9P016	THYN1	-3.196	-4.956	-3.617	-5.802	-4.168	-6.345	1.76	-0.4205	-2.606	-0.972	-3.149	0.160846	0.701891	0.008168	0.308821	0.007522
Q9BYN8	MRPS26	-2.042	-3.796	-4.995	-4.149	-2.968	-3.351	1.755	-2.953	-2.107	-0.9259	-1.31	0.229731	0.044329	0.188715	0.42373	0.304868
A0A087WTD5	NOMO2	-2.372	-4.122	-5.245	-5.279	-5.341	-3.377	1.75	-2.872	-2.907	-2.969	-1.005	0.264213	0.050556	0.065155	0.056064	0.432678
A0A7I2V2Z5	NOMO3	-2.372	-4.122	-5.252	-5.262	-5.364	-3.404	1.75	-2.88	-2.89	-2.992	-1.032	0.26422	0.050077	0.065421	0.05567	0.428076
H3BMQ1	PFDN5	0.831	-0.9184	0.9536	0.1942	0.4947	0.3677	1.749	0.1226	-0.6368	-0.3363	-0.4633	0.22988	0.260397	0.033896	0.053947	0.119223
A0A087WWT3	ALB	0.8812	-0.8669	0.9512	1.023	0.9304	0.3765	1.748	0.06999	0.1414	0.04918	-0.5047	0.234243	0.856347	0.715488	0.866848	0.09593
Q9NX58	LYAR	-2.885	-4.634	-4.555	-4.73	-4.427	-2.56	1.748	-1.669	-1.845	-1.542	0.326	0.274813	0.356951	0.223217	0.333182	0.814443
I3L4X0	PPP4C	-2.07	-3.818	-4.357	-4.196	-4.33	-3.736	1.748	-2.288	-2.126	-2.261	-1.666	0.249695	0.14315	0.054041	0.096634	0.190946
K7EMZ6	PRKAR1A	-1.891	-3.639	-1.107	-1.963	-2.116	-2.184	1.748	0.7841	-0.07207	-0.2251	-0.2935	0.097394	0.235728	0.91572	0.701325	0.791612
E9PSI1	E9PSI1	-0.6235	-2.365	-2.088	-3.21	-2.706	-1.6	1.742	-1.464	-2.587	-2.083	-0.9769	0.115918	0.050726	0.116147	0.056967	0.435175
O75886	STAM2	-0.8857	-2.623	-3.245	-0.531	-5.047	-5.024	1.738	-2.359	0.3547	-4.162	-4.139	0.493907	0.15731	0.850827	0.022467	0.016175
Q6SZW1	SARM1	-2.085	-3.822	-4.456	-3.923	-3.47	-3.073	1.737	-2.371	-1.838	-1.385	-0.9879	0.265446	0.160584	0.291816	0.422033	0.430387
Q9H1Z4	WDR13	-1.287	-3.024	-1.889	-1.35	-3.902	-2.806	1.737	-0.6025	-0.06322	-2.616	-1.519	0.160164	0.123017	0.898985	0.095241	0.003944
O60885	BRD4	-0.1336	-1.87	-1.298	-1.112	-1.879	-1.24	1.736	-1.164	-0.978	-1.746	-1.106	0.080115	0.032326	0.074001	0.018191	0.163487
J3KQ18	DDT	-5.417	-7.148	-3.383	-6.855	-4.248	-4.495	1.731	2.034	-1.438	1.169	0.9219	0.114425	0.126185	0.164968	0.513295	0.474901
A8MV33	PDXK	-1.536	-3.265	-4.815	-4.667	-2.7	-5.69	1.73	-3.279	-3.131	-1.164	-4.154	0.280831	0.027194	0.016547	0.404778	0.005922
Q9H4B7	TUBB1	-2.098	-3.828	-6.095	-5.531	-5.631	-3.066	1.73	-3.997	-3.433	-3.533	-0.9679	0.12742	0.001914	0.020234	0.004357	0.406597
Q8N9T8	KRI1	-2.029	-3.756	-4.457	-2.646	-2.374	-2.144	1.728	-2.428	-0.6175	-0.345	-0.1155	0.369898	0.148548	0.721855	0.862826	0.949223
Q08752	PPID	0.5616	-1.166	-2.205	-2.192	-3.039	-0.9783	1.728	-2.767	-2.753	-3.6	-1.54	0.031662	0.003838	0.004981	0.042918	0.087656
B1AMS2	SEPTIN6	-0.3871	-2.112	-0.8412	0.2617	-2.726	-0.3645	1.725	-0.4541	0.6488	-2.339	0.02256	0.277294	0.831382	0.209022	0.065343	0.958767
Q9NPF4	OSGEP	-0.2497	-1.974	-0.2295	-0.8882	-1.809	0.2861	1.724	0.02017	-0.6385	-1.56	0.5358	0.17272	0.962646	0.442528	0.005712	0.230813
Q86TB9	PATL1	0.09587	-1.627	-3.265	-3.039	-1.072	-2.135	1.723	-3.361	-3.135	-1.168	-2.231	0.508358	0.167678	0.183089	0.685868	0.308766
H3BT57	PML	-4.5	-6.222	-6.147	-0.5684	-5.425	0.3857	1.722	-1.648	-0.115	-0.9256	0.8392	0.080534	0.084506	0.67837	0.373708	0.006849
D6RGZ2	THOC3	-1.882	-3.603	-2.798	-1.367	-2.422	-1.893	1.721	-0.9161	0.5149	-0.5403	-0.01129	0.079279	0.488379	0.456958	0.665832	0.98618
Q9BU61	NDUFAF3	-0.03437	-1.752	-2.616	-1.668	-1.547	-0.7169	1.717	-2.582	-1.633	-1.513	-0.6825	0.151357	0.124934	0.195051	0.246225	0.571033
Q12962	TAF10	-0.9477	-2.665	-1.908	-2.601	-2.13	-2.781	1.717	-0.9599	-1.654	-1.182	-1.834	0.243111	0.045573	0.017777	0.118071	0.129784
Q9NRR5	UBQLN4	-2.342	-4.059	-1.877	-3.398	-4.064	-3.573	1.717	0.4651	-1.056	-1.722	-1.231	0.060713	0.468646	0.168739	0.097485	0.263094
O00442	RTCA	0.8975	-0.8147	0.2116	0.172	0.2843	0.6782	1.712	-0.6859	-0.7255	-0.6132	-0.2193	0.230891	0.466371	0.038724	0.132997	0.764166
F8WEI0	PYCR3	-2.434	-4.145	-5.997	-4.087	-3.956	-6.499	1.711	-3.563	-1.653	-1.522	-4.065	0.328166	0.035719	0.354134	0.374629	0.01971
E7EW59	SALL2	-0.706	-2.417	-3.598	-1.077	-3.314	-2.262	1.711	-2.893	-0.3706	-2.608	-1.556	0.048728	0.068305	0.685915	0.073932	0.065251
Q7Z333	SETX	2.55	0.8398	3.335	0.6613	0.4944	1.612	1.711	0.7841	-1.889	-2.056	-0.9387	0.017461	0.179053	0.010534	0.028435	0.176204
Q96BN8	OTULIN	-5.606	-7.313	-5.29	-6.883	-5.212	-7.019	1.707	0.3164	-1.277	0.3937	-1.413	0.072136	0.808731	0.143114	0.714681	0.149565
A0A087X1Q1	TP53	-2.245	-3.951	-3.533	-0.3901	0.006902	-1.849	1.707	-1.288	-0.7876	-0.3906	0.3959	0.372151	0.407953	0.40234	0.526095	0.823096
Q9BZG1	RAB34	0.3361	-1.37	-0.4953	-0.06187	-0.003234	0.1074	1.706	-0.8314	-0.398	-0.3394	-0.2288	0.093855	0.065275	0.241679	0.357991	0.483277
Q6P2H3	CEP85	-2.169	-3.874	-2.543	-3.886	-2.091	-3.329	1.705	-0.374	-1.717	0.07766	-1.16	0.150728	0.497915	0.136808	0.937945	0.260826
A0A2R8Y4L2	HNRNPA1P48	-5.504	-7.207	-6.189	-6.124	-6.885	-3.614	1.703	-0.6848	-0.6195	-1.381	1.89	0.074516	0.439029	0.496135	0.119686	0.161568
Q8N5F7	NKAP	-2.573	-4.273	-1.314	-3.75	-2.391	-2.284	1.7	1.259	-1.177	0.1825	0.2889	0.252162	0.052263	0.352353	0.881453	0.680402
A0A7I2V2R3	HNRNPA3	0.7574	-0.9385	-3.829	-1.25	-1.695	-0.6374	1.696	-4.587	-2.007	-2.452	-1.395	0.412299	0.052466	0.379438	0.25927	0.403452
A0A7P0TA53	VPS53	2.558	0.8619	-0.6668	-1.722	2.994	2.295	1.696	-3.225	-4.28	0.4354	-0.2633	0.212603	0.029629	0.012614	0.727745	0.864755
M16_N184A_Myc_FLAG	M16_N184A_Myc_FLAG	2.744	1.054	0.4365	2.147	3.249	3.464	1.69	-2.308	-0.5972	0.5048	0.72	0.004164	0.000401	0.240453	0.20404	0.04071
J3QSB3	SS18	-1.51	-3.198	-1.526	-5.995	-1.424	-2.069	1.688	-0.01567	-4.485	0.0857	-0.5592	0.043391	0.969263	0.006153	0.812761	0.21883
P49902	NT5C2	1.535	-0.1484	1.224	1.329	0.7592	1.582	1.684	-0.3118	-0.2066	-0.7762	0.04679	0.033715	0.595267	0.545638	0.279832	0.891581
O15126	SCAMP1	-0.6147	-2.298	0.7143	-0.06463	-1.068	-1.392	1.684	1.329	0.55	-0.4531	-0.7769	0.095511	0.047992	0.449798	0.431843	0.078853
Q96SB8	SMC6	1.57	-0.1141	-1.268	-2.162	1.457	1.306	1.684	-2.838	-3.732	-0.1133	-0.2637	0.16116	0.035376	0.029904	0.725009	0.429102
M16_MD_Myc_FLAG	M16_MD_Myc_FLAG	2.754	1.07	0.4582	2.147	3.25	3.559	1.683	-2.296	-0.6066	0.4961	0.8052	0.004129	0.000451	0.23326	0.210048	0.034547
P78347	GTF2I	5.53	3.848	4.866	3.763	4.041	4.615	1.681	-0.6633	-1.767	-1.488	-0.9147	0.029234	0.294093	0.037962	0.068121	0.272593
P49585	PCYT1A	-0.8789	-2.559	-1.671	-0.6521	-2.128	-1.33	1.68	-0.7919	0.2268	-1.25	-0.4508	0.016605	0.121262	0.646081	0.254851	0.635015
Q15746	MYLK	-0.4535	-2.133	-3.011	-4.114	-3.643	-2.963	1.679	-2.558	-3.66	-3.19	-2.509	0.316431	0.034694	0.010445	0.045945	0.052362
Q9Y2Z4	YARS2	-1.535	-3.213	-1.395	-2.717	-0.8678	-1.282	1.679	0.1394	-1.183	0.6668	0.2522	0.304727	0.759579	0.172393	0.152573	0.539163
A0A087WZ13	RAVER1	0.5312	-1.141	-0.3402	-0.1681	-1.029	-0.3635	1.672	-0.8715	-0.6993	-1.56	-0.8947	0.078121	0.08784	0.253577	0.006873	0.163428
I3L471	PITPNA	-2.45	-4.113	-1.467	-1.878	-2.121	-0.7976	1.663	0.983	0.5723	0.3292	1.653	0.443038	0.499363	0.702666	0.851049	0.271128
Q5JNZ5	RPS26P11	0.4583	-1.203	-4.469	-1.299	-2.251	-0.9006	1.662	-4.927	-1.757	-2.709	-1.359	0.545816	0.080064	0.536388	0.377118	0.616753
Q15286	RAB35	-3.168	-4.827	-5.214	-4.872	-3.865	-3.017	1.659	-2.046	-1.704	-0.6974	0.1513	0.3518	0.255827	0.322817	0.688744	0.914562
G2XKQ0	SUMO1P1	-1.16	-2.819	-3.813	-1.105	-2.444	-1.568	1.659	-2.653	0.05484	-1.284	-0.4081	0.48492	0.244226	0.978613	0.52724	0.844062
O43464	HTRA2	1.172	-0.4857	-0.1108	-0.2847	1.006	0.4383	1.658	-1.283	-1.457	-0.1658	-0.7337	0.167946	0.002616	0.012843	0.626997	0.027047
O75746	SLC25A12	-5.861	-7.518	-4.197	-6.68	-7.875	-5.785	1.657	1.664	-0.8191	-2.014	0.07584	0.220619	0.210101	0.506983	0.149005	0.960607
F5GYJ5	SDHAF2	-0.8327	-2.486	-2.073	-2.521	-1.311	-2.935	1.654	-1.24	-1.688	-0.4779	-2.103	0.245544	0.276456	0.462486	0.626574	0.075219
Q3SY84	KRT71	-4.282	-5.935	-5.19	-6.846	-3.948	-3.534	1.653	-0.9081	-2.565	0.3336	0.7478	0.192181	0.386537	0.033204	0.763576	0.514345
E7EWE1	UBA5	0.2885	-1.363	-2.213	-1.876	-1.021	-1.333	1.652	-2.502	-2.164	-1.505	-1.622	0.186026	0.003875	0.058097	0.247108	0.028917
E9PQD8	GATD1	-1.841	-3.485	-5.526	-6.274	-2.164	-3.058	1.644	-3.685	-4.433	-0.3232	-1.217	0.296866	0.006476	0.000548	0.808519	0.050614
Q96FJ2	DYNLL2	-4.889	-6.532	-4.337	-4.05	-5.615	-5.088	1.643	0.551	0.8385	-0.7269	-0.1993	0.12483	0.71291	0.568866	0.555254	0.886394
P62854	RPS26	0.4505	-1.19	-4.488	-1.295	-2.2	-0.9006	1.641	-4.938	-1.746	-2.651	-1.351	0.554385	0.082724	0.542391	0.390692	0.621867
F8WEA6	PMPCB	1.84	0.2047	0.9121	0.1527	-0.03699	-0.2804	1.636	-0.9282	-1.688	-1.877	-2.121	0.082605	0.337245	0.075582	0.055925	0.038195
Q8IYT4	KATNAL2	-2.248	-3.879	-6.424	-4.991	-2.551	-3.425	1.631	-4.176	-2.743	-0.3032	-1.177	0.336551	0.012353	0.109526	0.868129	0.466667
P56134	ATP5MF	-0.3309	-1.959	-1.688	-2.068	-1.413	-0.7787	1.628	-1.358	-1.737	-1.082	-0.4478	0.440068	0.110577	0.312385	0.470936	0.507829
A0A2R8YDQ0	A0A2R8YDQ0	-2.033	-3.656	-2.728	-2.75	-1.445	-1.676	1.622	-0.6942	-0.7169	0.5884	0.3569	0.075486	0.396728	0.543396	0.383013	0.684246
Q96BM9	ARL8A	-1.458	-3.078	-1.365	-4.798	-4.125	-2.521	1.619	0.09341	-3.339	-2.667	-1.062	0.201638	0.737107	0.004913	0.086125	0.171581
C4P0D8	TSNAX-DISC1	-0.3067	-1.926	0.2718	-0.1956	-0.1902	0.1349	1.619	0.5785	0.1111	0.1165	0.4416	0.303649	0.505996	0.907982	0.914601	0.649218
P09497	CLTB	1.659	0.04092	-0.1583	-0.3396	0.02749	0.9997	1.618	-1.817	-1.999	-1.632	-0.6594	0.135036	0.045532	0.081417	0.099826	0.167276
H3BMM5	H3BMM5	1.309	-0.3049	-0.4948	-2.923	0.9064	1.356	1.613	-1.803	-4.232	-0.4021	0.0474	0.03566	0.106607	0.033281	0.348193	0.925771
A0A2R8YF87	VPS33A	1.309	-0.3049	-0.4948	-2.923	0.9064	1.356	1.613	-1.803	-4.232	-0.4021	0.0474	0.03566	0.106607	0.033281	0.348193	0.925771
A0A3B3IRP5	CDC73	-0.8471	-2.457	-2.975	-2.987	-1.508	-1.072	1.61	-2.128	-2.14	-0.6609	-0.2248	0.083833	0.00732	0.077176	0.345941	0.73714
J3KPU7	RSL1D1	0.2934	-1.316	-0.1181	0.08515	0.5815	0.2647	1.609	-0.4114	-0.2082	0.2881	-0.02863	0.37249	0.281743	0.534224	0.501885	0.942613
P68366	TUBA4A	1.491	-0.1179	1.588	1.609	1.523	1.281	1.609	0.09718	0.1179	0.03152	-0.2099	0.427106	0.811506	0.717049	0.922055	0.534393
Q6UUV7	CRTC3	-2.059	-3.663	-3.088	-3.98	-2.684	-2.796	1.605	-1.029	-1.921	-0.6254	-0.7373	0.238559	0.360215	0.078617	0.538997	0.231147
Q8N0Z6	TTC5	-3.808	-5.413	-2.532	-2.871	-3.264	-2.819	1.605	1.276	0.9374	0.5446	0.9894	0.143229	0.168503	0.359198	0.618831	0.306617
Q71U36	TUBA1A	4.191	2.588	4.821	5.377	4.824	4.548	1.603	0.6304	1.186	0.6328	0.3574	0.508833	0.215411	0.034031	0.285199	0.58579
K7EJX8	DUS3L	-5.619	-7.22	-4.288	-5.434	-5.308	-6.449	1.601	1.331	0.1842	0.3105	-0.8299	0.086211	0.200702	0.842291	0.742999	0.337676
A0A0C4DFM1	TM9SF4	-0.08108	-1.681	-0.3835	-1.956	0.1715	-0.233	1.6	-0.3024	-1.875	0.2526	-0.1519	0.067485	0.69687	0.066227	0.745486	0.820721
F8WC19	SF3B1	-1.431	-3.026	-2.674	-2.107	-0.871	-1.151	1.595	-1.243	-0.6764	0.56	0.2804	0.302562	0.339729	0.495937	0.185209	0.595727
A8MXB9	SUMF2	-0.15	-1.745	-1.195	-1.618	-1.001	-0.5089	1.595	-1.045	-1.468	-0.851	-0.3589	0.200323	0.045008	0.149244	0.221669	0.646849
A6NCC9	TSSC4	-3.154	-4.748	-5.803	-3.32	-3.991	-2.257	1.594	-2.649	-0.1666	-0.8367	0.8964	0.239847	0.008881	0.846088	0.53027	0.210268
K7EP06	RNMT	0.05866	-1.535	-0.3769	0.1468	-0.02662	-0.9088	1.593	-0.4356	0.08811	-0.08528	-0.9675	0.363161	0.236473	0.820074	0.729965	0.122018
Q9Y5Q8	GTF3C5	0.4448	-1.145	-0.6447	-1.438	-0.359	-0.2626	1.59	-1.089	-1.883	-0.8038	-0.7074	0.196253	0.106133	0.028938	0.154088	0.034099
O75607	NPM3	-0.6538	-2.244	-2.889	-1.608	-1.465	-1.477	1.59	-2.235	-0.9543	-0.8108	-0.8232	0.218167	0.156294	0.436098	0.530036	0.49544
P0DPB6	POLR1D	-1.484	-3.074	-0.7616	-2.024	-1.539	-2.343	1.59	0.7228	-0.5399	-0.05444	-0.8583	0.02476	0.137278	0.631789	0.917816	0.554172
Q9Y221	NIP7	-3.169	-4.758	-3.702	-3.871	-1.757	-6.629	1.589	-0.5332	-0.7023	1.412	-3.46	0.468631	0.739194	0.687435	0.282482	0.032708
D6RBI1	SNF8	-0.9095	-2.496	-1.564	-2.439	-1.279	-1.567	1.587	-0.6545	-1.529	-0.3692	-0.6574	0.387022	0.375699	0.106704	0.678764	0.434459
Q9BVK6	TMED9	0.6844	-0.9023	-0.2855	-0.2468	-0.347	-0.4588	1.587	-0.9699	-0.9312	-1.031	-1.143	0.335902	0.001795	0.396849	0.388633	0.416312
Q15386	UBE3C	-0.7134	-2.297	-2.015	-1.421	-2.05	-1.11	1.583	-1.301	-0.7073	-1.337	-0.3961	0.362529	0.361398	0.678521	0.366177	0.765683
Q86UP8	GTF2IRD2	-4.416	-5.999	-2.594	-1.649	-5.322	-5.435	1.582	1.823	2.767	-0.9057	-1.019	0.272575	0.097082	0.03031	0.497407	0.369586
Q8N8A6	DDX51	-4.716	-6.296	-4.802	-5.173	-5.036	-7.171	1.58	-0.08624	-0.4565	-0.3195	-2.454	0.172809	0.965003	0.738017	0.75386	0.022088
Q12802	AKAP13	0.955	-0.6228	-0.1165	-1.661	-0.08018	-0.7261	1.578	-1.072	-2.617	-1.035	-1.681	0.174438	0.101083	4.3e-05	0.302041	0.001116
R4GN37	MAP2K4	-1.056	-2.634	-1.627	-1.043	-0.6502	-0.3181	1.578	-0.5704	0.01292	0.4062	0.7382	0.223373	0.212286	0.964096	0.233721	0.104072
P36405	ARL3	1.92	0.3478	1.421	1.737	1.391	0.9343	1.572	-0.4989	-0.1831	-0.5294	-0.9857	0.380958	0.037206	0.249382	0.150866	0.181536
Q56VL3	OCIAD2	-0.7981	-2.366	-2.91	-1.862	-1.708	-1.254	1.568	-2.112	-1.064	-0.91	-0.4558	0.071173	0.001726	0.264397	0.033499	0.265452
Q96BW5	PTER	-1.432	-2.998	-1.438	-3.868	-2.597	-1.831	1.567	-0.006395	-2.436	-1.165	-0.399	0.156091	0.991752	0.037647	0.377008	0.646727
Q9UBD5	ORC3	0.2937	-1.271	-1.254	-3.068	0.3079	0.1058	1.565	-1.548	-3.361	0.01419	-0.1879	0.263389	0.092847	0.072374	0.979496	0.759539
Q8N5M4	TTC9C	-2.941	-4.506	-4.263	-5.627	-3.745	-5.211	1.565	-1.322	-2.685	-0.8042	-2.27	0.179806	0.083443	0.004714	0.396089	0.021905
H3BQI1	DYNLRB2	1.215	-0.3494	0.5062	1.065	1.653	1.308	1.564	-0.7086	-0.1503	0.4377	0.09316	0.352874	0.177187	0.544957	0.030253	0.635697
P13647	KRT5	-0.6693	-2.233	-1.476	-0.2135	-0.8579	-0.8007	1.564	-0.8069	0.4558	-0.1886	-0.1314	0.024635	0.344245	0.474778	0.821237	0.864565
Q03426	MVK	-2.9	-4.461	-3.001	-3.356	-4.652	-3.973	1.561	-0.1011	-0.4562	-1.752	-1.073	0.121395	0.88093	0.612162	0.146128	0.316153
Q9NVD7	PARVA	-2.624	-4.183	-5.299	-3.45	-3.62	-2.786	1.559	-2.675	-0.8264	-0.9966	-0.1622	0.379966	0.14725	0.555368	0.449171	0.931173
C9JZI1	RFC4	0.5629	-0.9948	0.3057	-0.6306	0.3579	-0.07847	1.558	-0.2572	-1.194	-0.2051	-0.6414	0.110301	0.531207	0.500308	0.546416	0.156559
Q9NQW6	ANLN	-2.09	-3.645	-0.8937	0.642	-2.097	-0.1011	1.555	1.197	2.732	-0.006946	1.989	0.340149	0.091514	0.052188	0.990752	0.026129
A0A5F9ZHB6	PRIM1	1.116	-0.4386	0.4717	-0.1961	-0.6618	0.4658	1.554	-0.6441	-1.312	-1.778	-0.65	0.072323	0.309501	0.315839	0.109065	0.215696
O60493	SNX3	1.695	0.1433	0.908	1.127	1.127	1.467	1.552	-0.7875	-0.5687	-0.5687	-0.2287	0.090404	0.237528	0.451595	0.217856	0.576946
B5TY33	MAPK14	-1.15	-2.7	-1.37	-4.453	-2.447	-3.183	1.549	-0.22	-3.303	-1.297	-2.033	0.276899	0.488379	0.000864	0.33955	0.005801
Q6S8J3	POTEE	0.009313	-1.538	-0.1773	-2.065	0.4026	-4.16	1.548	-0.1866	-2.074	0.3933	-4.169	0.064792	0.600196	0.006635	0.60242	0.006488
Q9UBB6	NCDN	-1.168	-2.715	-2.58	-1.727	-2.003	-3.028	1.547	-1.412	-0.5585	-0.8351	-1.86	0.027661	0.094188	0.560587	0.545753	0.005231
Q96G28	CFAP36	-1.284	-2.83	-2.32	-1.65	-2.372	-1.215	1.546	-1.036	-0.3657	-1.089	0.06851	0.051036	0.007914	0.571132	0.242965	0.914232
Q86VS8	HOOK3	-1.248	-2.794	-3.601	-1.57	-0.3684	-2.295	1.546	-2.353	-0.3227	0.8794	-1.047	0.424952	0.139882	0.839699	0.333604	0.313463
A0A494BXY3	C11orf98	-5.6	-7.145	-5.434	-6.789	-6.861	-2.358	1.545	0.1666	-1.189	-1.261	3.242	0.051831	0.917925	0.094542	0.081153	0.155643
F5GYT7	QKI	0.5771	-0.9677	-1.73	0.938	0.8903	0.8411	1.545	3.182	0.3609	0.3133	0.264	0.477719	0.12404	0.282812	0.568444	0.620451
E9PP77	RRM1	0.3289	-1.215	-0.8555	-0.06067	-2.364	0.1024	1.543	-1.184	-0.3896	-2.693	-0.2265	0.097532	0.076832	0.404597	0.138522	0.381762
A0A024RBT2	DIABLO	-1.847	-3.389	-4.32	-3.539	-3.248	-1.928	1.542	-2.51	-1.692	-1.401	-0.1184	0.246573	0.103482	0.220081	0.277649	0.8329
O15270	SPTLC2	-0.1027	-1.644	-1.591	0.09713	0.02765	-1.409	1.542	-1.489	0.1999	0.1304	-1.306	0.123223	0.041699	0.751432	0.868641	0.151385
Q9NWU2	GID8	-0.8653	-2.399	-1.832	-2.292	-0.8161	-2.343	1.534	-0.967	-1.427	0.04924	-1.478	0.168659	0.211965	0.365729	0.951063	0.087736
E9PPH0	CHID1	-0.7737	-2.304	-1.062	-1.596	-1.729	-0.7479	1.53	-0.2888	-0.8227	-0.9551	0.02578	0.124153	0.610915	0.181188	0.302917	0.972844
Q9NQE9	HINT3	-3.528	-5.055	-3.343	-6.253	-3.442	-7.652	1.527	0.1851	-2.724	0.08689	-4.123	0.230176	0.902036	0.0595	0.938752	0.012627
Q9P003	CNIH4	-0.6218	-2.145	3.172	-0.005651	0.863	1.853	1.524	3.794	0.6162	1.485	2.475	0.379028	0.009451	0.636791	0.351082	0.072713
Q8WUH6	TMEM263	1.381	-0.1384	0.7886	-0.4619	1.197	0.651	1.52	-0.5927	-1.843	-0.1839	-0.7303	0.348894	0.107359	0.013815	0.664604	0.058192
E5RH00	G3BP1	1.872	0.3582	1.459	1.541	1.909	1.844	1.514	-0.4133	-0.3313	0.03705	-0.02811	0.330908	0.144877	0.330771	0.79935	0.857866
P02795	MT2A	-4.018	-5.532	-5.928	-4.659	-4.339	-3.484	1.514	-1.91	-0.6404	-0.321	0.5338	0.335947	0.244401	0.586799	0.790969	0.574608
O60869	EDF1	1.532	0.02134	1.443	0.4115	0.5024	1.348	1.511	-0.08896	-1.121	-1.03	-0.1844	0.248767	0.891414	0.284672	0.326945	0.826134
G5E9U5	GDI1	0.7733	-0.7373	1.025	0.8621	1.03	0.7342	1.511	0.2517	0.08882	0.2563	-0.03911	0.384966	0.2283	0.574049	0.181374	0.813761
A0A6Q8PGR1	GNAO1	-5.687	-7.198	-3.835	-6.374	-5.126	-5.304	1.511	1.852	-0.6873	0.5613	0.3834	0.143416	0.166403	0.485305	0.677722	0.769995
Q9Y5K3	PCYT1B	-5.905	-7.413	-6.909	-6.558	-6.932	-5.86	1.508	-1.004	-0.6535	-1.028	0.04496	0.041716	0.106102	0.289294	0.14948	0.978212
Q8NI36	WDR36	-0.5094	-2.017	-0.5617	-1.316	-1.965	-0.5562	1.507	-0.0523	-0.8067	-1.456	-0.04689	0.271621	0.935743	0.600084	0.14682	0.951108
Q9NZB2	FAM120A	0.2183	-1.287	0.6369	0.7002	-0.01752	-0.1659	1.505	0.4187	0.4819	-0.2358	-0.3842	0.059323	0.187288	0.292262	0.598821	0.429989
Q92520	FAM3C	-0.5654	-2.07	-0.9585	-1.316	0.1497	-1.211	1.505	-0.3931	-0.7505	0.7151	-0.6461	0.178246	0.669642	0.429989	0.481803	0.582563
Q71RC2	LARP4	-0.9717	-2.474	-1.666	-2.169	-0.9203	-2.159	1.502	-0.6938	-1.197	0.05142	-1.187	0.435086	0.176513	0.389468	0.952058	0.12733
Q9BYT8	NLN	0.6762	-0.8253	0.6266	0.4638	-0.4013	0.5903	1.502	-0.04968	-0.2124	-1.078	-0.08594	0.299171	0.91236	0.681437	0.212699	0.853553
O75531	BANF1	1.025	-0.4751	0.7448	0.2641	0.2728	0.3592	1.5	-0.2803	-0.7611	-0.7524	-0.6659	0.213369	0.555509	0.156531	0.369852	0.314339
Q9H6W3	RIOX1	-3.728	-5.223	-3.056	-1.587	-1.929	-1.019	1.495	0.6725	2.141	1.799	2.709	0.111105	0.276343	0.002102	0.001893	0.000254
Q9UK45	LSM7	-1.24	-2.734	-3.377	-1.2	-3.203	-4.458	1.494	-2.137	0.04077	-1.963	-3.218	0.460683	0.356672	0.985803	0.363474	0.125002
A0A2R8Y6C7	GPI	-4.746	-6.239	-6.343	-5.401	-6.578	-6.787	1.493	-1.597	-0.6552	-1.832	-2.041	0.228497	0.119264	0.536864	0.086037	0.063352
F5GWT2	PDCD2	-2.399	-3.891	-6.821	-3.017	-5.183	-6.534	1.492	-4.422	-0.6183	-2.784	-4.135	0.47568	0.017615	0.766263	0.099398	0.020353
A6NF01	POM121B	-2.347	-3.838	-3.436	-6.516	-3.742	-4.317	1.492	-1.089	-4.169	-1.395	-1.971	0.284198	0.279335	0.000108	0.04521	0.009742
Q8NHH9	ATL2	-1.847	-3.338	-2.056	-3.645	-3.387	-2.395	1.491	-0.2087	-1.798	-1.54	-0.5482	0.41921	0.468563	0.116897	0.158196	0.122154
E9PM68	PUM1	-5.275	-6.766	-6.71	-6.422	-6.251	-5.374	1.491	-1.435	-1.147	-0.9756	-0.09893	0.12109	0.127834	0.233942	0.346871	0.934163
A0A804HI36	ACSL4	-2.629	-4.117	-1.768	-2.736	-2.11	-1.779	1.489	0.8603	-0.107	0.5186	0.8495	0.40409	0.539565	0.952582	0.712817	0.635111
Q07812	BAX	1.29	-0.1962	1.117	0.7888	0.9887	1.316	1.486	-0.1724	-0.5009	-0.3011	0.02666	0.142701	0.679414	0.482434	0.584187	0.957389
Q9HB90	RRAGC	0.9716	-0.5127	0.0182	-2.781	0.3797	1.187	1.484	-0.9534	-3.752	-0.5918	0.2156	0.072603	0.22957	0.00174	0.556709	0.732706
Q6UWP2	DHRS11	-3.378	-4.86	-6.262	-4.564	-5.287	-6.188	1.482	-2.885	-1.186	-1.909	-2.81	0.443406	0.063716	0.447893	0.248973	0.069568
Q15750	TAB1	0.699	-0.7831	-1.914	-2.246	-2.639	-0.5403	1.482	-2.613	-2.946	-3.338	-1.239	0.501969	0.263225	0.177708	0.202808	0.591447
Q08623	PUDP	-5.056	-6.533	-3.083	-6.88	-4.982	-2.876	1.477	1.973	-1.824	0.07447	2.18	0.38212	0.280699	0.250795	0.963668	0.238165
F8WAU4	GFM1	-4.608	-6.084	-6.992	-6.452	-6.336	-7.077	1.476	-2.385	-1.844	-1.728	-2.469	0.10408	0.071957	0.01453	0.06385	0.003766
Q9H993	ARMT1	-0.03633	-1.512	-3.127	-0.1397	-0.2845	-2.723	1.475	-3.09	-0.1034	-0.2482	-2.687	0.462082	0.0017	0.855087	0.620472	0.069587
Q00526	CDK3	-4.309	-5.784	-0.1548	-6.147	-6.251	-2.197	1.475	4.154	-1.838	-1.942	2.112	0.376041	0.039805	0.288272	0.241313	0.307133
P42025	ACTR1B	-5.173	-6.646	-5.977	-4.45	-6.794	-6.999	1.473	-0.8039	0.7228	-1.621	-1.826	0.028821	0.199796	0.558725	0.022034	0.025325
P01023	A2M	1.179	-0.2916	1.34	2.194	1.142	0.933	1.47	0.1609	1.016	-0.03667	-0.2457	0.09837	0.729432	0.029689	0.948274	0.578966
Q9Y547	HSPB11	-5.692	-7.16	-3.685	-4.096	-6.509	-6.864	1.468	2.007	1.595	-0.8169	-1.173	0.122114	0.258036	0.288434	0.39277	0.181913
Q96Q40	CDK15	-5.099	-6.565	-4.172	-5.852	-5.542	-5.292	1.466	0.9276	-0.7532	-0.4427	-0.1923	0.252591	0.498807	0.56996	0.732817	0.877026
A0A1B0GUL7	A0A1B0GUL7	-3.889	-5.355	-7.058	-6.87	-5.618	-5.341	1.465	-3.169	-2.981	-1.728	-1.452	0.393528	0.058498	0.070597	0.306789	0.339128
Q6NZI2	CAVIN1	-1.33	-2.795	-1.904	-1.585	-1.774	0.02686	1.465	-0.5745	-0.2554	-0.4446	1.357	0.271001	0.376254	0.424224	0.434513	0.02646
P62851	RPS25	4.333	2.868	3.321	4.138	3.822	3.919	1.465	-1.011	-0.1947	-0.5107	-0.4143	0.071701	0.087335	0.668596	0.268325	0.191504
Q9NYZ3	GTSE1	-0.03836	-1.502	-2.154	-1.707	-1.723	-1.822	1.464	-2.116	-1.669	-1.685	-1.784	0.048648	0.040685	0.060754	0.024956	0.020002
P28072	PSMB6	2.351	0.8912	1.719	2.458	2.138	2.577	1.46	-0.6317	0.1076	-0.2124	0.2263	0.303258	0.029607	0.598118	0.43089	0.553679
E9PGT3	RPS6KA1	-2.791	-4.25	-6.872	-5.322	-4.74	-6.598	1.46	-4.081	-2.532	-1.949	-3.807	0.385434	0.020937	0.122353	0.300046	0.025718
Q9GZZ1	NAA50	0.2874	-1.172	-0.2447	-0.05918	-1.015	0.8681	1.459	-0.5321	-0.3466	-1.303	0.5807	0.204139	0.32013	0.453949	0.144762	0.399244
Q9Y5J9	TIMM8B	-0.02756	-1.479	-0.1275	-0.2756	-0.05663	-0.6174	1.451	-0.09998	-0.2481	-0.02907	-0.5898	0.457929	0.715799	0.333681	0.928297	0.085393
H3BQQ2	ZNF598	1.64	0.1892	1.548	-1.207	-0.4658	-0.3733	1.451	-0.09198	-2.847	-2.106	-2.014	0.307432	0.932364	0.041932	0.223421	0.122549
P12074	COX6A1	1.168	-0.28	1.277	1.573	1.399	1.697	1.448	0.1089	0.4045	0.231	0.5293	0.528056	0.686055	0.185338	0.578097	0.10451
A0A804HKE6	FH	0.9774	-0.4701	-1.135	-0.2757	0.4778	0.6888	1.448	-2.112	-1.253	-0.4997	-0.2886	0.130534	0.066341	0.030604	0.253684	0.396981
Q53QZ3	ARHGAP15	3.472	2.025	3.646	4.166	4.223	4.306	1.447	0.1739	0.6946	0.7509	0.8343	0.345375	0.744408	0.213911	0.176152	0.141595
O60826	CCDC22	0.5615	-0.8859	-0.3732	-0.4493	-0.5437	0.06434	1.447	-0.9348	-1.011	-1.105	-0.4972	0.158864	0.22326	0.167845	0.133711	0.489399
R4GNC1	SRP72	0.4201	-1.027	-0.2775	0.4592	-0.1658	0.2988	1.447	-0.6977	0.03906	-0.586	-0.1213	0.274147	0.119385	0.939979	0.066211	0.599572
Q9BU76	MMTAG2	1.353	-0.09329	1.604	2.067	1.322	1.265	1.446	0.2513	0.7142	-0.03154	-0.08834	0.220244	0.619989	0.108858	0.954585	0.917846
Q92614	MYO18A	2.109	0.6634	0.9917	-0.3856	1.332	0.4435	1.446	-1.117	-2.494	-0.7771	-1.665	0.067963	0.104201	0.021809	0.231925	0.019243
Q9BTU6	PI4K2A	1.928	0.4854	-0.4915	-1.598	0.3486	-0.5299	1.443	-2.42	-3.526	-1.579	-2.458	0.125922	0.077387	0.022941	0.213716	0.135742
M0QXN5	NUP62	-1.546	-2.987	-1.786	-1.412	-0.5089	-0.6083	1.44	-0.2399	0.134	1.037	0.938	0.277068	0.817175	0.920545	0.187919	0.26654
P78346	RPP30	-0.8377	-2.275	-1.891	-1.64	-2.344	-2.398	1.438	-1.053	-0.8027	-1.506	-1.56	0.103953	0.222123	0.386955	0.102291	0.128762
Q9H1E3	NUCKS1	0.9534	-0.4834	1.146	0.9334	1.214	1.25	1.437	0.1926	-0.01998	0.2604	0.2965	0.018086	0.600336	0.958106	0.482087	0.453676
Q68DQ2	CRYBG3	2.34	0.9043	1.473	2.056	1.965	1.172	1.435	-0.8662	-0.2832	-0.3746	-1.168	0.06935	0.019038	0.514584	0.339905	0.098556
F5GWG1	SKA3	-3.177	-4.611	-5.69	-4.489	-5.385	-5.753	1.434	-2.513	-1.312	-2.208	-2.576	0.332914	0.156884	0.409697	0.136581	0.157851
Q99614	TTC1	1.059	-0.3723	0.3063	0.7215	0.8594	1.031	1.431	-0.7526	-0.3374	-0.1995	-0.02837	0.074942	0.078754	0.332209	0.714411	0.956379
B9A041	MDH1	2.494	1.064	2.637	2.811	2.987	2.765	1.429	0.143	0.3172	0.4934	0.2715	0.396128	0.441658	0.252715	0.04228	0.247259
Q96Q15	SMG1	0.465	-0.9633	-0.7075	0.3074	-0.5661	0.3877	1.428	-1.172	-0.1575	-1.031	-0.07728	0.196099	0.215986	0.895256	0.339327	0.935554
P11441	UBL4A	-0.8374	-2.266	-1.859	-1.226	-0.671	-0.5764	1.428	-1.022	-0.3887	0.1664	0.2611	0.237502	0.225995	0.449801	0.82831	0.694694
O60784	TOM1	-0.6544	-2.082	-0.8067	-0.1605	-0.6365	-0.886	1.427	-0.1522	0.494	0.01797	-0.2315	0.265746	0.637967	0.277501	0.961544	0.599287
Q9BRL6	SRSF8	-5.323	-6.745	-6.486	-6.246	-6.251	-6.082	1.422	-1.163	-0.923	-0.9281	-0.759	0.1425	0.133842	0.325847	0.29959	0.434873
Q7Z7K0	CMC1	-0.8704	-2.291	-3.42	-1.075	-1.379	-2.132	1.42	-2.549	-0.2046	-0.5083	-1.262	0.170378	0.130182	0.854197	0.548448	0.43995
E9PKH2	SERPINH1	-5.806	-7.224	-1.158	-5.646	-5.069	-3.161	1.418	4.649	0.1606	0.7377	2.645	0.351025	0.020144	0.929472	0.646353	0.165921
Q9NPA0	EMC7	-0.2896	-1.698	1.983	-0.9749	-0.638	-1.562	1.408	2.273	-0.6852	-0.3483	-1.273	0.210507	0.001722	0.55149	0.760107	0.194972
M0R2S2	EPS15L1	-4.447	-5.853	-6.701	-5.715	-6.209	-6.52	1.406	-2.254	-1.268	-1.762	-2.073	0.092403	0.059247	0.156465	0.047992	0.070048
Q7Z4H8	POGLUT3	-0.3497	-1.755	-1.861	-1.552	-2.296	-1.36	1.406	-1.511	-1.203	-1.946	-1.01	0.198735	0.065044	0.155403	0.008077	0.003808
A0A7I2V5R8	DPP4	0.7645	-0.6393	0.214	0.2059	0.3473	0.4525	1.404	-0.5504	-0.5586	-0.4172	-0.312	0.143322	0.297971	0.2353	0.370348	0.63293
A2ABF9	EHMT2	6.306	4.905	7.179	5.664	5.338	6.002	1.401	0.8735	-0.6417	-0.9674	-0.3036	0.407434	0.321981	0.551792	0.316065	0.782799
E9PF19	TBL2	-1.955	-3.356	-2.324	-1.344	-3.065	-0.5817	1.401	-0.3693	0.6104	-1.11	1.373	0.22635	0.450354	0.072238	0.44625	0.004955
H3BQZ7	HNRNPUL2-BSCL2	-3.85	-5.25	-5.751	-5.794	-4.849	-5.447	1.4	-1.9	-1.944	-0.999	-1.596	0.485678	0.29219	0.275075	0.5808	0.387207
Q96DV4	MRPL38	-5.112	-6.512	-3.396	-4.902	-4.241	-4.099	1.4	1.716	0.2101	0.871	1.013	0.180099	0.190293	0.860634	0.346246	0.289258
F8WAT4	PAPOLG	-3.599	-4.997	-2.546	-5.473	-5.918	-4.476	1.398	1.053	-1.875	-2.319	-0.8769	0.116064	0.20786	0.022481	0.006757	0.346773
Q9Y294	ASF1A	-2.361	-3.758	-1.213	-1.754	-2.451	-2.558	1.396	1.148	0.6073	-0.08935	-0.1967	0.39262	0.297148	0.571797	0.952856	0.872311
E9PFD2	UMPS	-2.713	-4.109	0.6959	1.149	-3.511	-1.728	1.396	-0.3304	0.1229	-0.7979	0.9851	0.252053	0.158367	0.531063	0.499934	0.432146
A0A1B0GUD9	CPT2	-2.41	-3.805	-1.932	-4.39	-4.517	-2.794	1.395	0.4783	-1.98	-2.107	-0.3836	0.387434	0.332534	0.13524	0.128223	0.584608
Q86SX6	GLRX5	-1.205	-2.599	-2.46	0.1608	-1.241	-1.048	1.394	-1.255	1.366	-0.03636	0.157	0.308724	0.345935	0.133961	0.960717	0.843255
A0A7P0TAA2	AKAP9	2.931	1.541	2.932	2.625	1.24	3.057	1.391	0.0008966	-0.3064	-1.691	0.126	0.06694	0.998924	0.732671	0.043226	0.844426
G5E972	TMPO	-4.493	-5.884	1.408	2.994	-6.817	-2.081	1.391	5.9	0.5552	-2.324	2.411	0.313354	0.004597	0.071162	0.163733	0.102635
B4DEE8	MGMT	-2.39	-3.779	-2.25	-4.643	-4.233	-2.979	1.388	0.1407	-2.252	-1.842	-0.589	0.345007	0.908599	0.183526	0.280237	0.710318
A0A0J9YXF2	PON2	-1.001	-2.387	-1.543	-3.599	-1.596	-1.221	1.386	-0.5417	-2.597	-0.5953	-0.2195	0.303127	0.361379	0.088732	0.479561	0.436034
Q9Y3B7	MRPL11	1.187	-0.1946	0.2491	-0.1532	-0.3193	0.2089	1.382	-0.9383	-1.341	-1.507	-0.9785	0.176279	0.117982	0.042337	0.028063	0.146465
Q9BYD1	MRPL13	-0.8892	-2.272	-0.7684	-1.17	-2.097	-0.9043	1.382	0.1208	-0.2804	-1.207	-0.0151	0.218262	0.843289	0.633017	0.148355	0.980674
O15235	MRPS12	-2.138	-3.52	-0.836	-2.761	-0.7216	-1.975	1.382	1.302	-0.6224	1.417	0.1632	0.303288	0.228205	0.663784	0.09361	0.870414
Q96CV9	OPTN	-0.5556	-1.938	-1.86	-3.492	-1.96	-0.8878	1.382	-1.304	-2.936	-1.404	-0.3321	0.321893	0.273159	0.037363	0.393219	0.768506
E7EMD0	POR	0.9337	-0.4469	0.8359	0.444	-0.3614	0.615	1.381	-0.09778	-0.4897	-1.295	-0.3187	0.210162	0.918592	0.64388	0.196144	0.746431
I3L2J8	CEP131	0.4723	-0.9074	-1.331	-0.6574	-1.247	-0.8518	1.38	-1.804	-1.13	-1.719	-1.324	0.093515	0.025161	0.193329	0.057731	0.081518
Q9BW19	KIFC1	0.2596	-1.12	-0.008687	0.5605	0.3161	0.07159	1.379	-0.2683	0.3008	0.05649	-0.188	0.209199	0.80032	0.751255	0.953178	0.847588
Q9NVS9	PNPO	3.475	2.097	0.6464	2.054	2.014	2.846	1.378	-2.829	-1.422	-1.461	-0.6293	0.138935	0.004069	0.150704	0.194073	0.510562
Q9BZL6	PRKD2	-0.5997	-1.978	-1.54	0.1949	-2.976	-1.275	1.378	-0.9399	0.7946	-2.376	-0.675	0.127519	0.343033	0.139642	0.065515	0.421578
J3KS79	BLMH	1.07	-0.3073	-0.2584	-0.264	1.138	0.7369	1.377	-1.328	-1.334	0.06782	-0.3331	0.392193	0.011963	0.34924	0.925379	0.480432
Q9BPU6	DPYSL5	2.94	1.564	3.067	1.222	1.385	3.137	1.376	0.1276	-1.718	-1.555	0.1971	0.042925	0.8298	0.009912	0.033987	0.723496
A0A140T955	HLA-A	0.4321	-0.9427	-1.522	-0.1202	0.2758	0.2146	1.375	-1.954	-0.5523	-0.1562	-0.2175	0.11833	0.085063	0.3246	0.776784	0.352575
P07305	H1-0	-1.266	-2.639	-0.6891	-1.071	-1.475	-0.9553	1.373	0.5772	0.195	-0.2086	0.311	0.247337	0.392541	0.751291	0.736116	0.676824
E9PIF4	NEU1	-1.505	-2.873	-4.47	-4.743	-4.353	-5.715	1.369	-2.21	-3.239	-2.093	-3.455	0.199055	0.097381	0.022524	0.077062	0.047448
A0A087WTW0	UHRF1	-1.919	-3.288	-2.035	1.499	1.437	-2.496	1.369	-0.1163	-0.09168	-0.1539	-0.5776	0.415993	0.859825	0.797383	0.648995	0.511145
A0A6Q8PGV8	MFN2	-0.8957	-2.263	0.3332	-1.89	-0.8601	-0.7862	1.368	1.229	-0.994	0.03564	0.1095	0.101879	0.031257	0.06452	0.931588	0.74677
Q5TAQ9	DCAF8	-1.362	-2.729	-2.098	-3.355	-2.857	-1.788	1.367	-0.7358	-1.993	-1.495	-0.426	0.353388	0.572926	0.132616	0.263581	0.746078
Q96IK1	BOD1	-2.336	-3.7	-3.295	-4.336	-3.768	-2.397	1.364	-0.9594	-2	-1.433	-0.06094	0.405343	0.050839	0.079906	0.119044	0.876368
Q15042	RAB3GAP1	-1.065	-2.427	-1.795	-1.629	-2.502	-1.593	1.363	-0.7301	-0.5644	-1.437	-0.5284	0.286277	0.175027	0.515512	0.323136	0.298876
O15428	PIN1P1	0.494	-0.8667	0.09359	0.06581	0.1614	0.02936	1.361	-0.4004	-0.4282	-0.3326	-0.4646	0.081987	0.390955	0.490927	0.496571	0.560129
Q96GA3	LTV1	1.799	0.449	-0.5067	-1.276	0.5491	-0.2373	1.35	-2.306	-3.075	-1.25	-2.036	0.10383	0.012806	0.00301	0.122733	0.021784
E5RIJ0	POLB	-2.43	-3.776	-1.891	-2.52	-3.326	-2.932	1.346	0.5392	-0.08964	-0.8963	-0.5019	0.104138	0.086752	0.893467	0.417092	0.118898
P08574	CYC1	1.355	0.01066	1.978	1.19	1.261	1.07	1.344	0.6227	-0.1645	-0.09429	-0.2848	0.330423	0.09116	0.561361	0.827009	0.509549
Q9NRY5	FAM114A2	0.7821	-0.5613	0.09211	-1.372	-0.8364	0.2866	1.343	-0.69	-2.154	-1.619	-0.4955	0.398577	0.593303	0.182113	0.312879	0.761863
A5A3E0	POTEF	-4.963	-6.307	-6.573	-6.97	-5.997	-6.317	1.343	-1.609	-2.006	-1.033	-1.353	0.21886	0.099125	0.015479	0.195495	0.097345
O43149	ZZEF1	0.2058	-1.134	0.3873	-0.3801	-1.328	-0.131	1.34	0.1815	-0.5858	-1.533	-0.3367	0.025566	0.707738	0.052444	0.108943	0.39846
Q9Y6U3	SCIN	1.34	0.001008	-1.444	-0.532	0.008016	1.055	1.339	-2.784	-1.871	-1.332	-0.2846	0.039057	0.00149	0.056314	0.072465	0.676965
P35241	RDX	1.767	0.4304	1.048	1.16	1.398	1.631	1.337	-0.7196	-0.6069	-0.3693	-0.1359	0.306409	0.362278	0.44738	0.673572	0.845604
Q7Z2W9	MRPL21	-1.208	-2.543	-1.616	-1.87	-1.968	-2.028	1.335	-0.4077	-0.6618	-0.7598	-0.82	0.151748	0.368911	0.474211	0.225704	0.459721
K7ELR8	HEATR6	-2.945	-4.279	-2.174	-5.14	-4.041	-4.232	1.334	0.7709	-2.196	-1.096	-1.287	0.484109	0.597397	0.201479	0.521133	0.365472
A0A1B0GWD0	ACTR2	0.8124	-0.5209	0.6174	1.121	0.7496	0.3874	1.333	-0.1951	0.3084	-0.06285	-0.4251	0.395276	0.778592	0.706484	0.944513	0.606057
Q9P1Y5	CAMSAP3	1.385	0.05358	-0.8875	0.7638	-1.617	-0.5263	1.332	-2.273	-0.6216	-3.002	-1.912	0.238971	0.014686	0.500741	0.01183	0.028038
Q9Y624	F11R	-5.084	-6.416	-2.461	-4.867	-3.661	-3.257	1.332	2.623	0.2169	1.423	1.827	0.098622	0.032139	0.854413	0.216952	0.145597
A0A1W2PQU6	GLDC	-1.732	-3.063	-2.931	-2.479	-1.876	-1.593	1.332	-1.2	-0.747	-0.1444	0.1383	0.657926	0.656911	0.75381	0.95282	0.957631
E7ENQ8	PGM2	3.093	1.762	2.661	2.452	2.921	3.092	1.33	-0.4316	-0.6408	-0.1713	-0.0007734	0.40241	0.490618	0.364082	0.563723	0.997949
Q9P0S3	ORMDL1	-3.562	-4.891	-5.115	-3.957	-5.643	-3.682	1.329	-1.553	-0.3957	-2.082	-0.12	0.345133	0.088328	0.714738	0.10861	0.880977
S4R3N1	HSPE1-MOB4	-2.476	-3.803	-0.8452	-1.162	-0.9006	-1.125	1.327	1.631	1.314	1.576	1.351	0.419623	0.106511	0.157585	0.108236	0.139938
P28370	SMARCA1	2.758	1.436	2.119	2.599	2.444	1.755	1.322	-0.6392	-0.1595	-0.3136	-1.003	0.297511	0.443754	0.853642	0.778148	0.46955
Q9P013	CWC15	-1.741	-3.06	-5.571	-4.051	-3.263	-3.224	1.32	-3.83	-2.31	-1.522	-1.483	0.256076	0.020407	0.108188	0.243253	0.300199
A0A1B0GV98	FTO	-0.5714	-1.891	-1.476	-2.308	-1.852	-1.016	1.319	-0.9045	-1.736	-1.281	-0.4444	0.324982	0.25355	0.120913	0.286133	0.485015
P82932	MRPS6	-2.832	-4.148	-2.233	-3.164	-3.447	-3.016	1.317	0.5987	-0.3327	-0.6154	-0.1838	0.338092	0.272207	0.773127	0.653144	0.810499
A0A7P0T954	CUL4B	1.492	0.1757	1.555	-0.05275	1.061	1.095	1.316	0.06261	-1.545	-0.4315	-0.3973	0.181901	0.905367	0.035516	0.567586	0.668376
Q9Y5L4	TIMM13	1.067	-0.2478	1.428	1.794	1.416	0.8719	1.315	0.3609	0.7266	0.3484	-0.1956	0.528425	0.330774	0.031657	0.352971	0.549305
Q9Y3A3	MOB4	-2.476	-3.79	-0.8452	-1.162	-0.9006	-1.125	1.313	1.631	1.314	1.576	1.351	0.420834	0.106511	0.157585	0.108236	0.139938
P17612	PRKACA	1.372	0.05963	0.4634	-0.0142	0.9209	-0.6541	1.312	-0.9084	-1.386	-0.4509	-2.026	0.081105	0.142514	0.066455	0.480159	0.021781
Q9H446	RWDD1	-2.311	-3.623	-1.719	-2.648	-2.969	-1.908	1.312	0.5912	-0.3375	-0.6585	0.4028	0.059843	0.374223	0.740619	0.37491	0.573367
A0A0D9SF80	GTF2IRD2B	-5.855	-7.162	-5.365	-6.805	-5.168	-5.641	1.306	0.4901	-0.9492	0.6874	0.2147	0.062178	0.417072	0.107979	0.688586	0.881463
Q9UK41	VPS28	0.2838	-1.022	1.334	-2.476	0.5131	1.578	1.305	1.051	-2.76	0.2293	1.294	0.39978	0.422245	0.069154	0.871041	0.413796
A0A3B3ISX3	EIF2B5	-1.644	-2.948	-2.12	-2.634	-2.608	-0.7998	1.304	-0.476	-0.9893	-0.9638	0.8444	0.367016	0.618177	0.501728	0.453832	0.384172
Q6P2I3	FAHD2B	-1.248	-2.552	-2.075	-4.702	-1.035	-0.9278	1.304	-0.8263	-3.453	0.2133	0.3205	0.605969	0.536455	0.08472	0.896826	0.87241
A0A0G2JNZ2	SCRIB	2.152	0.8481	2.447	1.688	1.942	1.702	1.304	0.2952	-0.4639	-0.21	-0.4501	0.118775	0.441718	0.224963	0.613737	0.190649
A0A804HLA8	GNG5P2	-3.372	-4.676	-2.539	-5.726	-4.788	-2.863	1.303	0.8334	-2.354	-1.416	0.5098	0.295186	0.304987	0.028615	0.120325	0.293207
F8WAX2	PCMT1	-4.935	-6.236	-6.539	-6.998	-7.558	-5.653	1.3	-1.603	-2.062	-2.622	-0.7175	0.220137	0.11733	0.059944	0.02905	0.530653
Q9NRH3	TUBG2	0.608	-0.6925	0.09256	0.3984	0.09363	0.3667	1.3	-0.5154	-0.2096	-0.5143	-0.2413	0.269005	0.282543	0.547484	0.499063	0.591126
O43633	CHMP2A	3.726	2.43	2.313	2.476	4.159	3.72	1.297	-1.414	-1.251	0.4328	-0.006392	0.224662	0.136381	0.208054	0.573017	0.994328
Q86T03	PIP4P1	-4.951	-6.247	-6.813	-4.217	-6.529	-6.102	1.296	-1.861	0.7337	-1.578	-1.151	0.130572	0.024192	0.415848	0.04405	0.289661
Q9H2P9	DPH5	-0.8238	-2.118	-2.213	-4.316	-0.8493	-1.049	1.294	-1.389	-3.492	-0.02543	-0.2247	0.330621	0.144005	0.034086	0.883839	0.184125
E9PR30	FAU	3.784	2.49	3.48	3.576	3.686	3.647	1.294	-0.3043	-0.2079	-0.09814	-0.1371	0.270021	0.098491	0.174425	0.616748	0.51086
Q9BXT5	TEX15	-2.655	-3.949	-4.809	-4.38	-2.925	-6.917	1.294	-2.154	-1.725	-0.2701	-4.262	0.342604	0.059893	0.196173	0.706815	6e-06
A0A7P0TAL9	EIF2AK2	0.8612	-0.4249	0.4278	0.2971	-0.05358	0.3068	1.286	-0.4334	-0.5641	-0.9148	-0.5544	0.099014	0.043794	0.091042	0.221901	0.203429
P63218	GNG5	-3.372	-4.654	-2.539	-5.707	-4.806	-2.863	1.282	0.8334	-2.334	-1.433	0.5098	0.294583	0.304987	0.028327	0.121614	0.293207
G418_Resistance	aph(3')-II; neo; neo_1; neo-r	-2.467	-3.748	-3.569	-4.673	-4.508	-6.55	1.281	-1.102	-2.206	-2.041	-4.083	0.219707	0.486434	0.150016	0.155498	0.001125
D6RCP9	DCK	-3.748	-5.028	-2.271	-3.63	-3.03	-4.416	1.28	1.477	0.1176	0.7185	-0.6684	0.434598	0.232563	0.920681	0.573397	0.609531
P50225	SULT1A1	3.872	2.592	3.616	3.301	3.555	2.388	1.279	-0.2552	-0.5703	-0.3168	-1.484	0.008299	0.620555	0.196289	0.547273	0.009429
Q13045	FLII	0.3961	-0.8822	1.291	-0.9311	0.6979	0.5132	1.278	0.8947	-1.327	0.3018	0.1171	0.050383	0.024875	0.195055	0.472762	0.866923
Q9BS40	LXN	-1.528	-2.805	-1.279	-1.632	-3.338	-3.038	1.277	0.2494	-0.104	-1.81	-1.509	0.481077	0.851471	0.944932	0.229474	0.299579
Q9NWU5	MRPL22	-3.628	-4.905	-5.572	-3.561	-2.904	-4.685	1.276	-1.944	0.06763	0.7239	-1.056	0.302652	0.063335	0.943871	0.214061	0.412125
Q8TCC3	MRPL30	-3.071	-4.346	-5.558	-5.758	-3.914	-5.817	1.276	-2.487	-2.688	-0.8434	-2.746	0.38962	0.107783	0.055005	0.586752	0.045684
P35813	PPM1A	-2.078	-3.351	-0.4517	-1.674	-1.697	-0.6856	1.273	1.627	0.4044	0.3813	1.393	0.348886	0.128111	0.686671	0.749094	0.176384
E9PSF4	RPS3	-5.433	-6.706	-5.911	-4.879	-5.754	-6.707	1.273	-0.4776	0.5538	-0.3212	-1.274	0.154155	0.617667	0.692742	0.662112	0.000143
Q6P1M0	SLC27A4	-0.8451	-2.117	-2.736	-5.23	-2.942	-4.487	1.272	-1.891	-4.385	-2.097	-3.642	0.687318	0.145931	0.008531	0.215542	0.076842
A0A669KB71	TOX4	-0.8997	-2.171	-0.6463	-0.7893	-0.2504	-0.4085	1.272	0.2534	0.1103	0.6493	0.4912	0.480687	0.480247	0.750684	0.099598	0.218974
Q8WZA9	IRGQ	0.5148	-0.756	0.8676	0.8523	-0.3208	0.8503	1.271	0.3528	0.3375	-0.8356	0.3355	0.118657	0.126058	0.114637	0.173357	0.284442
P82909	MRPS36	-0.7279	-1.997	-2.146	-1.462	-1.246	-0.3583	1.269	-1.418	-0.7344	-0.5177	0.3695	0.445365	0.205486	0.437171	0.566961	0.586864
Q14CX7	NAA25	-0.1585	-1.425	2.3	-0.5304	-0.2439	0.4348	1.266	2.459	-0.3718	-0.08533	0.5933	0.086232	0.010352	0.684975	0.954431	0.57245
F8W8W4	PCYOX1	0.4203	-0.8452	0.2643	-0.3976	-0.4208	0.08877	1.266	-0.1561	-0.818	-0.8412	-0.3316	0.331063	0.768171	0.052323	0.117867	0.345649
B8ZZK4	RPL31	2.562	1.298	1.051	0.6104	1.635	2.567	1.264	-1.511	-1.952	-0.9267	0.005064	0.050324	0.113306	0.135196	0.272911	0.988079
Q9NUP9	LIN7C	1.922	0.6655	1.086	1.304	0.1511	1.335	1.257	-0.8358	-0.6177	-1.771	-0.5868	0.080871	0.057984	0.029697	0.055638	0.01489
Q96AB3	ISOC2	-1.585	-2.838	-2.126	-2.407	-2.731	-2.046	1.253	-0.5406	-0.8221	-1.146	-0.4606	0.439935	0.252869	0.015223	0.069056	0.50838
P62861	FAU	3.739	2.487	3.475	3.576	3.686	3.639	1.252	-0.2636	-0.1622	-0.05248	-0.1002	0.28355	0.158161	0.300188	0.793201	0.639724
B1AKZ5	PEA15	-1.943	-3.195	-5.015	-4.133	-2.733	-2.447	1.252	-3.072	-2.19	-0.7899	-0.5035	0.522139	0.145766	0.224569	0.623393	0.711916
O15400	STX7	2.343	1.091	2.015	1.138	1.922	2.178	1.252	-0.3272	-1.204	-0.4205	-0.1644	0.08254	0.659743	0.08988	0.553911	0.852737
Q5VW32	BROX	-1.212	-2.463	-0.7447	-0.3962	-0.2853	-3.427	1.251	0.4676	0.8161	0.9271	-2.215	0.244526	0.414629	0.125174	0.163412	0.065248
A0A087WY03	SREK1	-1.73	-2.98	-0.4173	-0.9444	-1.359	-0.4951	1.25	1.313	0.7857	0.3711	1.235	0.477871	0.008728	0.032776	0.363373	0.010201
Q5SRE5	NUP188	1.897	0.6473	1.699	0.1446	-0.3626	0.9315	1.249	-0.1981	-1.752	-2.259	-0.9652	0.410985	0.684217	0.043659	0.028118	0.356019
O94819	KBTBD11	-1.853	-3.101	-4.532	-3.613	-2.227	-2.43	1.248	-2.679	-1.76	-0.3741	-0.5771	0.483192	0.05755	0.087678	0.76441	0.484293
Q5JRA6	MIA3	1.148	-0.09963	2.298	-0.04755	0.3076	0.8373	1.247	1.15	-1.195	-0.8402	-0.3105	0.177198	0.266582	0.178221	0.326727	0.765363
Q9BVI4	NOC4L	1.265	0.01738	-0.3227	-1.053	-0.003645	1.123	1.247	-1.587	-2.318	-1.268	-0.1417	0.055504	0.018601	0.08255	0.073145	0.815041
A6NN50	OBSL1	-0.6437	-1.89	-1.806	-1.242	-2.677	-2.786	1.246	-1.163	-0.5983	-2.033	-2.142	0.318872	0.100809	0.409299	0.003377	0.05286
P33981	TTK	0.6902	-0.5561	0.8532	-0.2509	-0.362	0.7215	1.246	0.163	-0.9411	-1.052	0.03135	0.110286	0.638676	0.041007	0.325232	0.936438
O75828	CBR3	-1.634	-2.877	-2.656	-1.556	-1.938	-1.343	1.244	-1.022	0.07778	-0.3037	0.2905	0.250285	0.246642	0.905089	0.693382	0.671694
Q8N7X1	RBMXL3	1.157	-0.08494	1.608	1.182	1.35	2.079	1.242	0.4509	0.02527	0.1934	0.9226	0.611748	0.823771	0.991423	0.901306	0.590581
O60502	OGA	0.134	-1.107	-0.3333	0.3342	-0.7126	0.4036	1.241	-0.4673	0.2002	-0.8466	0.2696	0.173928	0.275911	0.661854	0.269884	0.583487
Q96ME7	ZNF512	-0.9044	-2.145	-0.3878	0.2316	-1.528	-1.296	1.241	0.5166	1.136	-0.6235	-0.3913	0.419864	0.580235	0.267293	0.604112	0.711665
Q96DA2	RAB39B	-4.302	-5.538	-6.033	-6.099	-4.784	-3.914	1.237	-1.732	-1.797	-0.4825	0.3878	0.472768	0.24078	0.217611	0.777505	0.820754
Q5SY16	NOL9	-1.947	-3.18	-0.3723	-1.544	-1.697	-1.662	1.233	1.575	0.4033	0.2504	0.2854	0.121717	0.047976	0.547631	0.741172	0.639179
Q9UQ13	SHOC2	-1.863	-3.095	-4.807	-4.069	-2.985	-2.474	1.232	-2.944	-2.206	-1.122	-0.6106	0.327502	0.04471	0.147952	0.420236	0.470786
Q9HCK8	CHD8	-2.007	-3.237	-3.954	0.3884	-1.585	-0.7149	1.23	-1.947	2.395	0.4215	1.292	0.318449	0.136303	0.046943	0.68819	0.118658
O14519	CDK2AP1	-3.04	-4.266	-1.573	-1.688	-1.657	-1.68	1.227	1.466	1.352	1.383	1.359	0.442204	0.163156	0.127457	0.129825	0.128098
P84095	RHOG	-2.384	-3.608	-5.312	-3.681	-3.468	-2.761	1.224	-2.927	-1.297	-1.084	-0.3771	0.499368	0.182843	0.470167	0.555588	0.809122
A0A0B4J1Z1	SRSF7	1.65	0.4264	1.46	0.4709	1.185	1.359	1.224	-0.1904	-1.179	-0.4646	-0.2909	0.203225	0.702211	0.346837	0.394975	0.652572
E7EQX7	TP53	0.3975	-0.8258	-0.1865	-0.8562	-4.617	0.6463	1.223	-0.584	1.389	-2.372	0.2488	0.119012	0.068683	0.272274	0.170531	0.286537
E9PDF6	MYO1B	-0.3603	-1.582	-0.08976	-0.3334	-0.02222	-1.148	1.222	0.2706	0.02698	0.3381	-0.7879	0.414137	0.466884	0.948108	0.507677	0.182905
A0A096LP25	AAK1	-0.7536	-1.97	-0.22	-1.496	0.3097	1.039	1.216	0.5337	-0.7424	1.063	1.793	0.458824	0.287175	0.606904	0.01436	0.000339
Q13610	PWP1	-0.283	-1.498	0.0004824	0.5736	-0.4035	-0.4619	1.215	0.2835	0.8566	-0.1205	-0.179	0.393296	0.701443	0.190463	0.765144	0.698691
O00469	PLOD2	-0.4326	-1.645	-0.3963	-0.7856	-0.452	0.007782	1.212	0.03632	-0.353	-0.01935	0.4404	0.024427	0.929958	0.388841	0.952895	0.331381
A0A669KBA0	TMEM30A	-0.8166	-2.026	-1.798	-1.845	-1.507	-2.004	1.21	-0.9811	-1.028	-0.6901	-1.187	0.201742	0.091266	0.164163	0.403754	0.096201
Q15637	SF1	3.408	2.201	2.652	2.267	2.604	3.481	1.207	-0.7556	-1.141	-0.8038	0.07345	0.157078	0.273272	0.10633	0.447747	0.922248
A0A087X1C1	TMSB15B	0.8531	-0.3539	0.8914	0.4674	-0.9163	0.1018	1.207	0.03826	-0.3858	-1.769	-0.7514	0.199911	0.886019	0.144439	0.000299	0.018421
G5E9W7	MRPS22	0.3527	-0.8488	-0.4898	0.4086	-0.4509	-0.5476	1.202	-0.8426	0.05589	-0.8036	-0.9004	0.19988	0.012785	0.795061	0.243461	0.167074
Q01130	SRSF2	3.109	1.907	1.695	2.76	1.977	2.317	1.202	-1.414	-0.3492	-1.133	-0.792	0.090493	0.108192	0.609841	0.161259	0.18474
P48047	ATP5PO	3.834	2.633	3.651	3.584	3.956	3.721	1.201	-0.1831	-0.2496	0.1222	-0.113	0.317664	0.297435	0.161774	0.555989	0.605208
Q96T51	RUFY1	-1.975	-3.177	-3.714	-1.315	-0.8064	-0.3461	1.201	-1.739	0.6602	1.169	1.629	0.325829	0.090572	0.287522	0.227569	0.122709
P56545	CTBP2	2.059	0.8592	1.186	0.5903	1.602	1.383	1.2	-0.8729	-1.469	-0.4566	-0.6763	0.039193	0.052256	0.01814	0.268625	0.100544
A0A804HJ99	TBCD	-5.308	-6.508	-6.9	-6.864	-5.428	-6.795	1.2	-1.592	-1.556	-0.1202	-1.487	0.142399	0.070651	0.07519	0.914011	0.084173
A0A024RAC6	ELOA	-2.502	-3.699	-5.504	-4.663	-3.891	-2.497	1.197	-3.002	-2.162	-1.39	0.004352	0.538208	0.068855	0.186559	0.396351	0.997832
Q9GZQ3	COMMD5	-2.769	-3.965	-2.909	-3.547	-3.006	-3.755	1.196	-0.1392	-0.7779	-0.2361	-0.9852	0.495559	0.901154	0.657513	0.858399	0.345567
Q02818	NUCB1	-1.064	-2.249	-1.439	-2.874	-1.857	-2.328	1.185	-0.3751	-1.809	-0.7926	-1.263	0.092377	0.509155	0.219637	0.111975	0.183192
Q4J6C6	PREPL	-1.865	-3.047	-5.262	-2.838	-2.4	-3.167	1.183	-3.398	-0.9732	-0.5355	-1.302	0.541493	0.01928	0.633094	0.558894	0.493265
A0A494C1S4	TPP2	0.8609	-0.3223	0.8636	-4.121	-2.885	-2.511	1.183	0.002756	-1.915	-0.6792	-0.3055	0.151314	0.983174	0.175046	0.231828	0.505955
J3QKM9	VAPA	0.7693	-0.414	0.3428	0.1986	-0.3297	-1.266	1.183	-0.4265	-0.5706	-1.099	-2.035	0.09307	0.392865	0.301647	0.004087	0.018613
Q9Y657	SPIN1	-0.08958	-1.271	0.1006	-2.633	-1.773	-1.404	1.181	0.1902	-2.543	-1.684	-1.315	0.037014	0.503004	0.105876	0.096579	0.026522
Q6PL18	ATAD2	-0.4562	-1.633	-0.546	-0.22	-2.338	-0.4469	1.177	-0.08977	0.2362	-1.882	0.009338	0.210002	0.915401	0.700761	0.171456	0.993472
A0A494C167	TBK1	-5.952	-7.13	-5.854	-5.113	-6.866	-7.127	1.177	0.09855	0.8396	-0.9139	-1.174	0.152107	0.905517	0.508385	0.215494	0.134878
P49755	TMED10	1.139	-0.03702	-0.06759	0.8941	-0.0194	1.407	1.176	-1.206	-0.2447	-1.158	0.2681	0.092328	0.110238	0.763354	0.168505	0.586288
A0A087WYP2	SELENOH	-1.877	-3.052	-2.718	-2.634	-1.833	-2.028	1.175	-0.841	-0.7573	0.04401	-0.1515	0.457671	0.509599	0.597057	0.957196	0.859747
O43347	MSI1	-3.842	-5.016	-0.4526	-1.673	-5.195	-1.541	1.174	3.389	2.169	-1.353	2.3	0.44544	0.01152	0.211789	0.220715	0.037881
P41567	EIF1	-0.1326	-1.302	-1.343	-0.7473	-0.5481	-0.6578	1.17	-1.21	-0.6147	-0.4155	-0.5252	0.221495	0.002847	0.121659	0.331389	0.162205
O60739	EIF1B	-0.1326	-1.302	-1.343	-0.7473	-0.5481	-0.6578	1.17	-1.21	-0.6147	-0.4155	-0.5252	0.221495	0.002847	0.121659	0.331389	0.162205
P49773	HINT1	5.966	4.8	5.313	5.573	5.54	5.953	1.167	-0.6532	-0.3936	-0.4262	-0.01366	0.080263	0.077324	0.240917	0.234984	0.963446
P01116	KRAS	-3.507	-4.674	-6.811	-6.091	-4.552	-6.924	1.167	-3.304	-2.584	-1.045	-3.417	0.479066	0.016204	0.034046	0.45816	0.083809
P00403	MT-CO2	-0.4764	-1.643	1.259	0.09613	-0.9328	-0.971	1.167	1.736	0.5725	-0.4564	-0.4946	0.524838	0.011251	0.6454	0.785042	0.695783
F1DAL7	NR2F1	-3.858	-5.024	-6.022	-5.182	-3.858	-5.393	1.166	-2.164	-1.324	-0.000162	-1.535	0.353992	0.064252	0.292236	0.999896	0.233401
F8VVM2	SLC25A3	2.421	1.255	1.097	1.785	1.247	1.662	1.165	-1.323	-0.6357	-1.174	-0.7592	0.117041	0.063352	0.362543	0.105297	0.126982
P05386	RPLP1	3.666	2.503	3.605	3.962	4.761	3.962	1.163	-0.06067	0.2957	1.095	0.2965	0.555621	0.929306	0.62845	0.184085	0.574939
P49427	CDC34	-1.978	-3.141	-2.321	-1.505	-1.409	-3.112	1.162	-0.3433	0.4728	0.569	-1.134	0.453738	0.536913	0.574223	0.359324	0.093346
Q53EZ4	CEP55	-0.5706	-1.732	0.1828	-3.428	-0.1709	0.3363	1.161	0.7534	-2.858	0.3997	0.9069	0.406767	0.420432	0.039027	0.733998	0.450402
Q9NWT8	AURKAIP1	-2.803	-3.963	-5.34	-3.963	-4.661	-3.157	1.16	-2.537	-1.16	-1.858	-0.3545	0.316865	0.050945	0.413631	0.119957	0.773523
O75934	BCAS2	-0.683	-1.843	-2.673	-2.526	-0.6468	-0.6926	1.16	-1.99	-1.843	0.03627	-0.009555	0.212704	0.139425	0.028016	0.948002	0.985806
Q5TEC6	H3-2	3.578	2.418	2.204	2.157	3.395	3.419	1.16	-1.374	-1.42	-0.1821	-0.1588	0.190543	0.16384	0.37467	0.810624	0.819403
Q8NC56	LEMD2	-0.9496	-2.109	-1.444	-3.486	-3.042	-2.355	1.16	-0.4941	-2.536	-2.092	-1.405	0.175779	0.31082	0.004288	0.000779	0.015905
Q14061	COX17	-1.737	-2.896	-3.339	-3.587	-2.237	-1.618	1.159	-1.602	-1.85	-0.4994	0.1195	0.440507	0.202354	0.173339	0.709855	0.804999
Q9P2D3	HEATR5B	0.2055	-0.9523	0.7706	-0.05858	-0.9589	0.2199	1.158	0.5651	-0.2641	-1.164	0.01443	0.192478	0.162364	0.549464	0.114558	0.981125
P19387	POLR2C	-0.07194	-1.23	-0.9776	-1.445	-0.5074	-2.205	1.158	-0.9056	-1.373	-0.4355	-2.133	0.113461	0.212027	0.215422	0.483493	0.088569
E9PRB9	SPCS2	-1.633	-2.786	-0.3723	0.2032	-3.074	-1.772	1.154	1.26	1.836	-1.441	-0.1395	0.467141	0.276763	0.126488	0.305877	0.890558
Q9NWB6	ARGLU1	-0.1014	-1.253	0.3976	-2.062	-3.462	-1.049	1.151	0.4991	-1.96	-3.361	-0.948	0.371209	0.527933	0.075261	0.022331	0.574737
A0A0C4DGU5	NOP16	-0.14	-1.287	0.1044	-1.681	-0.07353	1.288	1.147	0.2444	-1.541	0.0665	1.428	0.058342	0.434696	0.102223	0.796009	0.004685
F8W8R3	POLD2	-0.01276	-1.159	0.007104	-0.1237	-0.7326	0.2732	1.146	0.01986	-0.1109	-0.7199	0.286	0.337622	0.950391	0.837477	0.250099	0.394
Q9BX40	LSM14B	-6.037	-7.183	-6.327	-4.687	-7.03	-3.877	1.145	-0.2892	1.351	-0.9924	2.16	0.269225	0.79219	0.334362	0.31957	0.108922
E9PJT1	PICALM	0.8491	-0.2936	-0.4623	-0.1822	-1.05	0.07719	1.143	-1.311	-1.031	-1.899	-0.7719	0.078676	0.076238	0.205129	0.272308	0.175062
A0A0D9SFJ1	COQ6	-4.203	-5.344	-0.7701	-1.54	-5.931	-3.346	1.141	3.433	2.664	-1.728	0.8571	0.530437	0.067898	0.130355	0.296205	0.671409
P08648	ITGA5	-0.5293	-1.667	-3.124	-1.876	-0.1461	-2.66	1.138	-2.594	-1.346	0.3831	-2.131	0.257982	0.04565	0.177083	0.677361	0.027397
Q8NDC0	MAPK1IP1L	0.5409	-0.5976	1.852	1.185	1.733	0.8251	1.138	1.311	0.6445	1.192	0.2842	0.614591	0.034558	0.371366	0.127801	0.660403
Q05655	PRKCD	-3.7	-4.838	-5.859	-6.763	-5.188	-6.51	1.138	-2.159	-3.064	-1.488	-2.81	0.502981	0.161481	0.057415	0.39922	0.068593
J3KRE2	ARHGDIA	5.491	4.355	5.388	5.488	5.589	5.117	1.137	-0.1032	-0.003444	0.09818	-0.3743	0.350848	0.71964	0.988231	0.717118	0.124209
Q9NZ63	C9orf78	0.778	-0.3579	1.129	-0.5048	-1.03	0.8367	1.136	0.3514	-1.283	-1.808	0.05873	0.722074	0.758958	0.254672	0.161998	0.958469
O15446	POLR1G	0.4812	-0.6517	0.9375	1.338	0.003652	0.2214	1.133	0.4562	0.857	-0.4776	-0.2598	0.076411	0.24712	0.228378	0.081565	0.586347
G3V1B8	ZNRD2	-1.2	-2.333	-2.771	-3.873	-2.364	-2.428	1.133	-0.06589	-1.168	0.3407	0.2771	0.332848	0.953029	0.416992	0.829284	0.802284
H0YLJ3	MORF4L1	-1.7	-2.833	-1.552	-2.782	-1.26	-2.291	1.132	0.1486	-1.081	0.4402	-0.5902	0.388981	0.674713	0.330679	0.207102	0.357081
Q4VC05	BCL7A	-5.275	-6.405	-7.065	-6.52	-4.552	-6.874	1.13	-1.789	-1.244	0.7234	-1.599	0.420192	0.130369	0.267678	0.64654	0.163882
Q5SSJ5	HP1BP3	1.443	0.3135	1.902	0.951	1.001	1.193	1.13	0.4583	-0.4923	-0.4418	-0.2505	0.008547	0.168221	0.095218	0.471562	0.639976
P42677	RPS27	-3.217	-4.339	-5.899	-3.078	-4.531	-4.395	1.122	-2.681	0.1393	-1.314	-1.177	0.242766	0.027037	0.905945	0.281022	0.358056
A0A087X060	EAPP	-3.055	-4.177	-2.607	-4.599	-3.988	-2.451	1.121	0.448	-1.544	-0.9321	0.6039	0.399934	0.7311	0.307512	0.547501	0.694198
Q15024	EXOSC7	-1.983	-3.104	-1.548	-1.926	-3.252	-3.399	1.121	0.4344	0.0566	-1.269	-1.417	0.113232	0.381336	0.914405	0.129184	0.089696
O43809	NUDT21	2.014	0.893	1.581	1.602	0.609	1.493	1.121	-0.4335	-0.412	-1.405	-0.5216	0.096088	0.00683	0.035918	0.218588	0.554071
Q9ULC3	RAB23	-4.468	-5.588	-3.02	-5.928	-3.939	-4.036	1.119	1.448	-1.46	0.5296	0.4318	0.276511	0.12656	0.200537	0.619658	0.569754
G3V119	CCAR2	-6.423	-7.541	-7.175	-3.998	-5.665	-7.503	1.118	-0.7519	2.425	0.7582	-1.08	0.332898	0.199358	0.187964	0.56079	0.095326
A0A3B3ITW3	ABCD3	1.83	0.7131	0.6503	1.945	0.7513	1.178	1.117	-1.18	0.1147	-1.079	-0.6521	0.082409	0.082865	0.843858	0.21026	0.300563
C9JG08	C2orf16	2.041	0.9234	0.6075	1.373	1.831	1.963	1.117	-1.433	-0.6676	-0.2098	-0.07765	0.007661	0.006371	0.05564	0.442572	0.829369
Q96MX6	DNAAF10	-3.267	-4.383	-1.78	-3.755	-2.927	-3.275	1.117	1.487	-0.4889	0.3398	-0.008742	0.065818	0.01415	0.405795	0.272063	0.990579
A0A2R8Y8D6	POLR1C	0.3435	-0.7737	-0.2013	-0.3822	0.579	-1.687	1.117	-0.5447	-0.7256	0.2356	-2.031	0.026428	0.09168	0.03529	0.826266	0.11213
Q7L9L4	MOB1B	-2.018	-3.134	-3.338	-3.718	-1.639	-1.956	1.116	-1.32	-1.7	0.3791	0.0621	0.023977	0.072293	0.146424	0.384441	0.936882
E9PGY2	DNAAF5	-2.337	-3.451	-1.9	1.375	0.8866	-3.589	1.115	0.4368	0.4396	-0.04892	-1.252	0.568961	0.727271	0.146008	0.855344	0.165358
Q9NW13	RBM28	1.601	0.4864	0.4922	-0.2386	0.2114	1.076	1.115	-1.109	-1.84	-1.39	-0.5254	0.039832	0.031987	0.031395	0.102155	0.295771
P51970	NDUFA8	1.094	-0.01962	1.279	1.433	1.714	2.603	1.114	0.1848	0.3384	0.6201	1.509	0.072832	0.749986	0.737111	0.45607	0.024936
Q00535	CDK5	-0.9377	-2.047	-1.089	-1.459	-2.127	-1.527	1.11	-0.1511	-0.5209	-1.189	-0.5889	0.369788	0.870849	0.627667	0.482588	0.465172
F8VS12	SARNP	-2.941	-4.051	-5.771	-4.823	-3.672	-2.579	1.11	-2.83	-1.882	-0.7305	0.3619	0.621696	0.223592	0.410811	0.746369	0.84797
A0A087WWG0	ATRX	-5.493	-6.602	-4.966	-3.306	-5.274	-5.591	1.109	0.5272	2.187	0.2189	-0.09767	0.275109	0.629935	0.075695	0.815433	0.929235
F8W1S1	KRT74	0.8993	-0.2097	1.032	1.353	-1.364	1.14	1.109	0.133	0.4535	-2.264	0.2409	0.014814	0.826641	0.246957	0.034723	0.635585
Q6VN20	RANBP10	-1.659	-2.767	-1.895	-1.358	-3.215	-3.534	1.108	-0.2358	0.3008	-1.556	-1.875	0.41514	0.669646	0.616675	0.344997	0.096462
Q9H425	C1orf198	-0.75	-1.857	-2.307	-0.3079	-0.1169	-1.025	1.107	-1.557	0.4422	0.6331	-0.2749	0.56185	0.346919	0.624665	0.516416	0.510737
A0A087WUN7	SLIRP	2.877	1.771	1.62	2.042	2.093	2.303	1.106	-1.257	-0.8355	-0.7846	-0.5744	0.133069	0.058366	0.275373	0.214661	0.244307
A0A2R8YDI9	RAB15	0.737	-0.3682	1.449	0.9578	1.163	0.7718	1.105	0.7122	0.2208	0.426	0.03484	0.578902	0.252923	0.668173	0.32668	0.932094
H0YL94	RAB8B	0.737	-0.3682	1.449	0.9578	1.163	0.7718	1.105	0.7122	0.2208	0.426	0.03484	0.578902	0.252923	0.668173	0.32668	0.932094
I3L2J4	PRPSAP2	-4.833	-5.936	-6.291	-6.933	-4.783	-6.849	1.103	-1.458	-2.1	0.04974	-2.016	0.419725	0.164982	0.057854	0.968262	0.0647
A0A804HJG7	CLASP2	0.4025	-0.6998	-0.1726	-0.4481	-0.8844	-0.8141	1.102	-0.575	-0.8506	-1.287	-1.217	0.0996	0.292245	0.039589	0.047397	0.001035
Q9UPY8	MAPRE3	-1.949	-3.051	-2.515	-3.358	-1.214	-2.952	1.102	-0.5654	-1.409	0.7358	-1.003	0.021797	0.134592	0.059982	0.050825	0.152999
P31937	HIBADH	0.5099	-0.5899	-0.03499	0.3282	-0.3114	-0.3215	1.1	-0.5449	-0.1817	-0.8213	-0.8314	0.233287	0.119462	0.745635	0.206047	0.007337
D6RB92	PSMG4	-2.273	-3.363	-3.157	-1.163	-4.416	-3.238	1.09	-0.8835	1.11	-2.143	-0.9648	0.504093	0.350697	0.080877	0.026523	0.277723
Q96HB5	CCDC120	2.314	1.225	2.71	1.809	1.025	1.901	1.089	0.3957	-0.5048	-1.29	-0.4134	0.30902	0.488087	0.237146	0.179597	0.240278
F8VZQ9	SARNP	-2.941	-4.031	-5.751	-4.756	-3.67	-2.579	1.089	-2.81	-1.815	-0.7287	0.3619	0.631851	0.226045	0.42381	0.7469	0.84797
G3V2U7	ACYP1	2.036	0.9498	-0.4677	-0.2448	1.067	0.9917	1.087	-2.504	-2.281	-0.9692	-1.045	0.055433	0.017432	0.250046	0.174512	0.369975
P52434	POLR2H	-1.198	-2.284	-4.105	-2.451	-1.271	-1.916	1.087	-2.907	-1.253	-0.07371	-0.7186	0.384034	0.12792	0.40731	0.946534	0.587478
P23229	ITGA6	0.6712	-0.4115	1.302	-3.781	-1.956	-0.6869	1.083	0.6312	-4.453	-2.627	-1.358	0.496468	0.292126	0.007613	0.0099	0.431795
B8ZZA8	GLS	-2.368	-3.449	-0.6707	-2.535	-3.923	-3.303	1.082	-1.492	-0.1667	-1.556	-0.9349	0.352861	0.012615	0.467328	0.202774	0.355303
Q9NQP4	PFDN4	1.24	0.1634	-0.04203	-0.418	0.7048	0.9861	1.077	-1.282	-1.658	-0.5356	-0.2543	0.172281	0.055505	0.032731	0.428681	0.723444
Q9BRF8	CPPED1	-0.8251	-1.9	0.1756	-0.7179	-1.047	-0.5382	1.075	1.001	0.1072	-0.2216	0.2869	0.494941	0.249829	0.917951	0.818689	0.685858
Q96CS2	HAUS1	-1.284	-2.355	-1.672	-3.133	-2.862	-1.131	1.071	-0.388	-1.849	-1.578	0.1527	0.09675	0.365118	0.192921	0.003712	0.89676
Q99729	HNRNPAB	-1.898	-2.966	-4.255	-1.133	-2.475	-3.039	1.069	-2.357	0.7645	-0.5773	-1.141	0.5856	0.24762	0.589782	0.743612	0.558331
S4R3H3	ZSWIM8	-0.1051	-1.174	0.673	-0.9888	-0.6908	0.4856	1.069	0.7781	-0.8837	-0.5857	0.5907	0.023813	0.141547	0.384558	0.057095	0.070746
Q9Y5V0	ZNF706	-0.9741	-2.04	-3.682	-2.699	-1.533	-1.385	1.066	-2.708	-1.725	-0.5588	-0.4109	0.502865	0.040827	0.211161	0.545055	0.590821
Q0VDF9	HSPA14	-0.8064	-1.87	-0.4594	0.1124	-0.6055	-0.9307	1.064	0.347	0.9188	0.2009	-0.1243	0.521317	0.416983	0.0738	0.564537	0.717708
O75691	UTP20	2.627	1.563	0.6662	1.65	1.621	2.874	1.064	-1.961	-0.9773	-1.006	0.2468	0.216316	0.058729	0.374673	0.281536	0.765056
Q96SI9	STRBP	-4.996	-6.057	-3.578	-6.429	-5.853	-6.634	1.061	1.418	-1.433	-0.8573	-1.638	0.394486	0.248936	0.150322	0.406882	0.121835
Q49A26	GLYR1	-1.73	-2.789	-2.775	-3.528	-3.179	-1.898	1.059	-1.045	-1.798	-1.449	-0.1683	0.387508	0.191147	0.221315	0.335549	0.815202
Q70UQ0	IKBIP	-3.035	-4.089	-3.854	-4.937	-2.431	-3.176	1.054	-0.8183	-1.901	0.6042	-0.141	0.462716	0.494072	0.164867	0.606637	0.895663
K7EKS7	K7EKS7	3.618	2.565	2.634	3.453	3.135	3.555	1.053	-0.9837	-0.1649	-0.4833	-0.06266	0.240526	0.252468	0.832111	0.542344	0.935734
G3V5F0	PNN	-2.685	-3.736	-4.97	-4.676	-4.06	-3.957	1.052	-2.286	-1.991	-1.376	-1.273	0.550849	0.136334	0.197002	0.398831	0.385362
E9PN76	RNF214	-6.134	-7.181	-4.357	-6.825	-3.148	-5.686	1.047	1.777	-0.6915	2.986	0.4477	0.094903	0.157226	0.160382	0.167846	0.483969
P56537	EIF6	2.966	1.92	2.27	2.434	3.069	2.725	1.046	-0.6961	-0.5317	0.1032	-0.2407	0.368813	0.061429	0.16185	0.814561	0.334906
P35754	GLRX	-5.065	-6.111	-3.737	-3.691	-4.498	-4.364	1.046	1.329	1.374	0.567	0.7012	0.507048	0.403996	0.41755	0.766125	0.67983
I3L3P8	ANKFY1	-0.6437	-1.685	-1.874	-1.787	-1.097	-2.256	1.041	-1.23	-1.143	-0.4536	-1.612	0.24766	0.055862	0.239524	0.505865	0.013362
Q8N6R0	METTL13	-2.034	-3.074	-2.228	0.8588	-1.689	-1.126	1.041	-0.1947	2.892	0.3445	0.9074	0.526294	0.889022	0.001184	0.505014	0.243961
A0A0B4J203	A0A0B4J203	0.06814	-0.9721	-1.228	-1.175	-0.3668	-1.241	1.04	-1.296	-1.243	-0.435	-1.309	0.060821	0.029728	0.026751	0.625999	0.056943
Q6UN15	FIP1L1	0.06814	-0.9721	-1.228	-1.175	-0.3668	-1.241	1.04	-1.296	-1.243	-0.435	-1.309	0.060821	0.029728	0.026751	0.625999	0.056943
Q9UGV2	NDRG3	-0.05216	-1.092	-1.53	-1.709	-1.222	-1.411	1.04	-1.478	-1.657	-1.17	-1.359	0.314844	0.083643	0.378826	0.1851	0.283345
M0QYZ7	DHPS	-5.567	-6.605	-6.736	-3.364	-4.368	-6.074	1.038	-1.169	2.203	1.199	-0.5073	0.388654	0.24406	0.150945	0.527753	0.677492
A0A3B3IS91	POLG	-4.214	-5.249	-2.057	-4.02	-3.463	-2.622	1.035	2.156	0.194	0.7506	1.592	0.460405	0.154339	0.890511	0.685057	0.388303
Q9UKD2	MRTO4	1.046	0.01432	0.8164	1.62	1.015	0.2544	1.032	-0.2298	0.5739	-0.03131	-0.7917	0.14187	0.481762	0.088076	0.944694	0.091084
Q8NEC6	MTMR1	-0.7171	-1.749	-3.061	-2.742	-1.338	-3.229	1.032	-2.344	-2.025	-0.6211	-2.512	0.593822	0.258561	0.312811	0.732597	0.294782
H3BV85	BOLA2B	2.959	1.931	2.079	2.458	2.877	2.836	1.028	-0.8803	-0.5015	-0.08245	-0.1227	0.14547	0.002031	0.015654	0.449003	0.432667
Q8WUW1	BRK1	-0.5463	-1.574	-1.541	-2.852	-1.027	-0.6576	1.027	-0.9947	-2.306	-0.4809	-0.1113	0.152519	0.241573	0.185765	0.466325	0.608059
Q53FV1	ORMDL2	-3.901	-4.922	-5.196	-4.357	-5.397	-3.703	1.021	-1.295	-0.4565	-1.496	0.1983	0.438745	0.108651	0.568895	0.155789	0.778967
Q9NQT4	EXOSC5	-0.807	-1.825	-0.6375	-0.6625	-0.5058	-0.6431	1.018	0.1695	0.1445	0.3012	0.1638	0.322487	0.703131	0.768447	0.576988	0.790187
E5RK35	TPD52	-0.457	-1.474	1.104	-0.2047	1.049	0.2736	1.017	1.561	0.2523	1.506	0.7306	0.614435	0.026622	0.640807	0.039678	0.298846
Q9H0P0	NT5C3A	-3.06	-4.077	-2.01	-3.283	-3.305	-1.689	1.016	1.05	-0.2227	-0.2446	1.371	0.462118	0.044232	0.838237	0.735723	0.053926
E9PHI4	SUN1	0.02975	-0.9859	-4.12	-1.754	-1.055	-3.104	1.016	-4.149	-1.784	-1.085	-3.134	0.420719	0.006109	0.039532	0.268949	0.003726
A0A0R4J2E5	UBE2A	-1.627	-2.643	-3.107	-3.903	-5.428	-4.358	1.016	-1.48	-2.276	-3.801	-2.731	0.628902	0.496408	0.253595	0.075637	0.168301
B4DYP1	DDAH1	1.905	0.8908	1.46	1.869	1.726	2.252	1.015	-0.4453	-0.03613	-0.1792	0.347	0.317373	0.095058	0.935658	0.691829	0.407323
Q8TD16	BICD2	-2.484	-3.498	-3.495	-2.398	-2.97	-2.358	1.014	-1.011	0.08628	-0.4856	0.1267	0.276429	0.154922	0.886338	0.488965	0.780289
A0A0D9SF54	SPTAN1	-5.896	-6.907	-3.649	-6.812	3.23	2.814	1.012	2.246	-0.9167	-0.5194	-0.9359	0.075696	0.055098	0.097475	0.012347	0.013538
A0A804HL67	SAMHD1	-0.2524	-1.262	-0.883	0.3564	-0.2638	0.5802	1.01	-0.6306	0.6088	-0.01146	0.8326	0.397454	0.247116	0.187072	0.978693	0.160193
P23258	TUBG1	0.8403	-0.1697	0.2812	0.679	0.7891	1.493	1.01	-0.5591	-0.1613	-0.05113	0.6528	0.408052	0.112582	0.604831	0.889409	0.02018
P13861	PRKAR2A	2.474	1.466	1.093	1.181	1.34	1.354	1.008	-1.381	-1.293	-1.134	-1.119	0.234082	0.104701	0.12124	0.191378	0.165967
Q9H7L9	SUDS3	-2.99	-3.996	-5.76	-2.033	-2.086	-2.381	1.006	-2.77	0.9568	0.9038	0.6084	0.290323	0.00645	0.330103	0.275259	0.036875
H3BSC1	RAB11A	2.614	1.61	1.88	2.34	2.332	2.455	1.004	-0.7337	-0.2741	-0.2819	-0.159	0.114813	0.152139	0.410765	0.316939	0.569593
P62310	LSM3	-0.2081	-1.208	0.7205	0.4414	0.9503	0.2827	0.9995	0.9286	0.6495	1.158	0.4908	0.63775	0.21317	0.39312	0.22224	0.473559
F2Z3H0	DNAJC2	0.4333	-0.5646	-1.061	-0.2904	-1.542	-0.2935	0.9979	-1.494	-0.7237	-1.975	-0.7268	0.095203	0.013037	0.134264	0.031538	0.164029
A0A087WWI4	HYOU1	2.037	1.04	2.224	1.366	1.877	0.8829	0.9975	0.1869	-0.6712	-0.1606	-1.154	0.045701	0.650866	0.119705	0.757747	0.104453
Q9H6D7	HAUS4	-1.405	-2.402	0.5387	-3.553	-2.154	-2.842	0.9967	1.944	-2.148	-0.7487	-1.437	0.539018	0.229234	0.194083	0.698769	0.44827
O75170	PPP6R2	-2.225	-3.221	-0.7564	-2.043	-2.854	-2.89	0.9955	1.469	0.1821	-0.6294	-0.6648	0.323686	0.16386	0.782618	0.621772	0.552589
Q8IUI8	CRLF3	0.2742	-0.7203	0.9186	-2.86	0.7096	-2.412	0.9945	0.6444	-3.134	0.4354	-2.686	0.473156	0.529338	0.01829	0.716126	0.118396
Q5XKE5	KRT79	-1.444	-2.437	-4.094	-2.303	-2.358	-1.295	0.9933	-2.65	-0.8593	-0.9134	0.1488	0.486994	0.165123	0.514831	0.358515	0.870703
J3KNF4	CCS	0.08012	-0.9131	-1.603	-1.103	-0.6688	0.06807	0.9932	-1.684	-1.183	-0.749	-0.01204	0.075113	0.004622	0.133529	0.251866	0.980953
O00505	KPNA3	0.1842	-0.809	0.853	-0.4307	0.8327	0.3317	0.9932	0.6688	-0.615	0.6485	0.1474	0.359684	0.022968	0.115562	0.064194	0.614171
M16_dL_Myc_FLAG	M16_dL_Myc_FLAG	-5.211	-6.202	-6.405	-7.747	-6.282	-6.42	0.9917	-1.194	-2.536	-1.072	-1.209	0.258902	0.101633	0.016617	0.224343	0.123185
A8CG34	POM121C	-1.218	-2.209	-2.314	-4.211	-2.587	-3.877	0.9913	-1.097	-2.994	-1.369	-2.659	0.005683	0.057974	0.06903	0.06385	0.00108
Q96DF8	ESS2	-0.6354	-1.625	-3.076	1.26	1.081	0.583	0.9892	-2.44	1.895	1.717	1.218	0.199814	0.029751	0.239908	0.152243	0.089493
P56385	ATP5ME	3.046	2.057	2.218	2.597	2.798	2.696	0.9891	-0.828	-0.449	-0.2482	-0.3501	0.065452	0.130863	0.180944	0.501891	0.192563
P08243	ASNS	1.808	0.8191	1.291	1.384	1.831	1.298	0.9888	-0.5166	-0.4239	0.02272	-0.5096	0.048791	0.170826	0.317622	0.960097	0.351626
WT_M16_Myc_FLAG	WT_M16_Myc_FLAG	-5.214	-6.2	-6.391	-7.739	-6.306	-6.377	0.9859	-1.177	-2.525	-1.092	-1.163	0.262292	0.106167	0.017312	0.220673	0.133284
O15084	ANKRD28	-4.393	-5.378	-6.247	-3.629	-4.315	-5.487	0.9851	-1.854	0.7642	0.07844	-1.094	0.228988	0.079527	0.27702	0.930587	0.214359
Q9NR28	DIABLO	-1.81	-2.794	-4.317	-3.204	-3.011	-1.937	0.9847	-2.47	-1.394	-1.201	-0.08942	0.518813	0.10707	0.378548	0.319283	0.871598
Q5VWZ2	LYPLAL1	0.8827	-0.09938	0.09408	-1.928	0.5349	1.486	0.9821	-0.7886	-2.81	-0.3478	0.6029	0.425901	0.263058	0.058799	0.642257	0.462473
Q99519	NEU1	-2.26	-3.242	-1.045	-5.27	-1.402	-1.726	0.9817	0.46	-3.01	0.1022	-0.2211	0.375676	0.394848	0.02301	0.889997	0.759609
P27348	YWHAQ	5.039	4.058	3.86	4.696	4.912	4.839	0.9809	-1.179	-0.3426	-0.1269	-0.2001	0.188205	0.094817	0.599059	0.803152	0.659983
O75940	SMNDC1	0.6048	-0.3756	-0.2111	0.4226	0.8326	0.7933	0.9804	-0.8159	-0.1822	0.2278	0.1885	0.124255	0.036585	0.583648	0.365649	0.590321
A0A0C4DGV1	MYEF2	-2.639	-3.619	-4.415	-3.053	-2.264	-3.373	0.9799	-1.776	-0.4133	0.3749	-0.7332	0.13185	0.275596	0.593733	0.678957	0.500064
Q9P2X3	IMPACT	-3.899	-4.878	-5.713	-2.124	-4.682	-2.367	0.9788	-1.814	1.775	-0.7829	1.532	0.44666	0.077294	0.077571	0.507769	0.191204
A0A494C0R8	CLUH	2.891	1.916	2.765	1.618	1.394	2.054	0.9747	-0.1257	-1.273	-1.497	-0.8365	0.067398	0.803413	0.017851	0.098743	0.097675
P82912	MRPS11	-0.8781	-1.851	-2.235	-0.611	-1.815	-2.134	0.9731	-1.357	0.2672	-0.9366	-1.256	0.317041	0.313	0.41351	0.200663	0.321729
O75496	GMNN	1.354	0.3807	1.231	-1.198	1.143	-0.3599	0.9729	-0.1228	-2.552	-0.2103	-1.713	0.445564	0.772147	0.09388	0.64874	0.210248
Q8N2G8	GHDC	-1.165	-2.137	-4.713	-3.879	-1.653	-2.662	0.9725	-3.548	-2.714	-0.4886	-1.498	0.231026	0.000454	0.008359	0.378461	0.034892
P25490	YY1	-2.235	-3.207	-5.277	-4.579	-2.225	-4.011	0.9712	-3.042	-2.344	0.0103	-1.775	0.549749	0.07611	0.200898	0.992377	0.273579
Q9Y2D0	CA5B	-2.858	-3.828	-6.066	-6.12	-3.623	-6.579	0.97	-3.208	-3.262	-0.7657	-3.721	0.489169	0.00072	0.001264	0.58088	0.0006
Q15907	RAB11B	2.614	1.644	1.989	2.351	2.332	2.457	0.9695	-0.6254	-0.2627	-0.2819	-0.1565	0.123739	0.174622	0.427058	0.316939	0.574066
Q86TI2	DPP9	-1.182	-2.15	-1.315	-2.01	-1.479	-1.328	0.9685	-0.1331	-0.8278	-0.297	-0.1463	0.548015	0.841811	0.544298	0.727027	0.682664
Q9H832	UBE2Z	0.536	-0.4323	-0.03251	0.228	-1.477	-0.7212	0.9684	-0.5686	-0.3081	-2.013	-1.257	0.275269	0.220015	0.571673	0.006805	0.101134
K7ENH0	EIF3G	0.9724	0.005994	1.608	1.937	1.875	1.336	0.9664	0.6352	0.9646	0.9025	0.3635	0.661328	0.140118	0.042907	0.174943	0.536141
K7ERI7	RPL22	3.92	2.955	2.95	3.743	3.468	3.826	0.9653	-0.97	-0.1772	-0.4518	-0.09357	0.212631	0.198247	0.793852	0.505291	0.888929
Q9NRP4	SDHAF3	-6.49	-7.456	-6.182	-0.6742	-5.163	-0.7662	0.9651	0.3089	5.816	1.328	5.724	0.102944	0.794994	0.001638	0.264131	0.004509
B1ALM5	TMEM9	-4.903	-5.867	-6.938	-5.76	-5.521	-6.907	0.9646	-2.036	-0.8571	-0.618	-2.004	0.507207	0.110901	0.531256	0.666079	0.114338
A6NIH7	UNC119B	-1.965	-2.928	-1.13	-3.94	-1.77	-3.233	0.963	0.8354	-1.975	0.1953	-1.268	0.272716	0.189473	0.175425	0.764735	0.183731
E9PJD9	RPL27A	3.751	2.788	3.347	3.749	3.612	3.679	0.9627	-0.4039	-0.002315	-0.1387	-0.07193	0.15331	0.182203	0.993232	0.633907	0.800647
Q86W50	METTL16	-5.217	-6.179	-6.44	-1.047	0.9539	-6.298	0.9622	-1.223	-2.245	-0.245	-1.081	0.271396	0.097539	0.060802	0.733365	0.153266
Q9C0C2	TNKS1BP1	1.142	0.1813	1.049	0.255	0.5604	-0.2146	0.9607	-0.09263	-0.887	-0.5816	-1.357	0.214742	0.833616	0.155274	0.160754	0.199541
P55209	NAP1L1	3.68	2.725	3.395	3.409	3.489	3.689	0.9549	-0.2845	-0.2705	-0.1911	0.009664	0.042756	0.574117	0.586023	0.696657	0.985361
Q5T3I0	GPATCH4	-0.6899	-1.643	-2.916	-4.317	-2.21	-2.66	0.9528	-2.226	-3.627	-1.521	-1.971	0.383257	0.012563	0.122737	0.234878	0.068763
U3KQT1	ESD	2.707	1.756	2.55	2.811	2.425	2.475	0.9512	-0.157	0.1037	-0.2817	-0.232	0.067207	0.746913	0.673445	0.540006	0.524066
Q6RW13	AGTRAP	-4.068	-5.018	-3.26	-3.45	-4.184	-4.83	0.9509	0.8071	0.6173	-0.116	-0.7622	0.651865	0.584025	0.719714	0.954167	0.55449
Q6XQN6	NAPRT	-0.664	-1.614	-0.7598	-2.062	-0.2703	-0.9508	0.9499	-0.09585	-1.398	0.3937	-0.2868	0.237312	0.90548	0.107382	0.590925	0.753149
Q8TDD1	DDX54	-1.527	-2.476	-1.982	-2.957	-1.19	-2.059	0.9495	-0.4554	-1.43	0.3368	-0.5327	0.582612	0.747612	0.347166	0.781466	0.638937
H3BUX2	CYB5B	0.7498	-0.1996	0.6643	0.03691	0.5868	0.4622	0.9493	-0.08552	-0.7129	-0.163	-0.2876	0.446642	0.76265	0.020366	0.611763	0.461376
A0A7I2V3Q3	LAS1L	0.8896	-0.05911	-2.811	-0.6568	0.03641	-0.1026	0.9487	-3.7	-1.546	-0.8531	-0.9922	0.348446	0.011066	0.153821	0.403878	0.328099
Q4G0J3	LARP7	-0.6565	-1.604	0.2127	-1.205	-1.208	-0.1453	0.9471	0.8692	-0.5487	-0.5513	0.5112	0.353228	0.016914	0.105982	0.153515	0.25118
Q8WX93	PALLD	2.134	1.188	1.444	0.8601	1.237	0.7229	0.946	-0.6897	-1.274	-0.8962	-1.411	0.209086	0.150055	0.006769	0.122624	0.000428
E5RJM9	RARS1	1.806	0.8611	1.141	1.656	1.973	1.663	0.9452	-0.6649	-0.1502	0.1667	-0.1434	0.433028	0.316164	0.769898	0.541108	0.714845
Q7Z4V5	HDGFL2	1.307	0.3634	0.6835	0.6688	0.4562	0.3717	0.9441	-0.6239	-0.6387	-0.8512	-0.9358	0.045763	0.008733	0.037536	0.154502	0.111291
P84022	SMAD3	-2.562	-3.506	-0.2822	0.3673	-2.657	-0.2089	0.9441	2.28	2.929	-0.09499	2.353	0.541079	0.004802	0.001415	0.939731	0.001485
Q15643	TRIP11	0.7409	-0.2021	-0.8902	0.09499	-0.1093	0.07771	0.9429	-1.631	-0.6459	-0.8502	-0.6632	0.288379	0.025198	0.416358	0.329519	0.310151
Q9P0K7	RAI14	0.6409	-0.301	0.4719	0.8804	0.2138	0.2047	0.9419	-0.1691	0.2395	-0.4272	-0.4363	0.216745	0.782617	0.638276	0.467191	0.441326
D6RDI0	RACK1	-0.5106	-1.45	-2.175	-1.5	-0.8057	-1.477	0.9397	-1.664	-0.9889	-0.2951	-0.9667	0.206	0.191474	0.302765	0.43213	0.256566
Q16186	ADRM1	-0.7289	-1.668	-1.056	-0.9262	0.4399	-0.6249	0.9388	-0.3272	-0.1973	1.169	0.1041	0.401665	0.662033	0.828367	0.024268	0.800531
E9PD35	FLT4	-2.212	-3.147	-0.3867	-1.491	-2.414	-1.706	0.9353	1.825	0.7209	-0.2026	0.5055	0.44128	0.050959	0.292061	0.880926	0.43462
Q9Y5M8	SRPRB	1.352	0.4174	0.1065	0.1061	1.146	0.148	0.9345	-1.245	-1.246	-0.2058	-1.204	0.201716	0.052008	0.079854	0.625777	0.075222
F8W9H0	VKORC1	-1.249	-2.183	-3.912	-1.598	-1.628	-1.118	0.9338	-2.663	-0.349	-0.3786	0.1311	0.348856	0.046147	0.617145	0.660754	0.816605
Q9BQB6	VKORC1	-1.249	-2.183	-3.912	-1.598	-1.628	-1.118	0.9338	-2.663	-0.349	-0.3786	0.1311	0.348856	0.046147	0.617145	0.660754	0.816605
Q86TX2	ACOT1	-0.3881	-1.321	-1.994	0.1295	0.4406	0.342	0.9328	-1.606	0.5175	0.8287	0.7301	0.508172	0.178873	0.583563	0.353518	0.439766
P60983	GMFB	1.29	0.3586	0.627	2.044	0.6051	1.77	0.9312	-0.6627	0.7539	-0.6846	0.4807	0.1353	0.444092	0.159118	0.152838	0.52618
P20648	ATP4A	0.8181	-0.1125	-0.06787	-1.625	-2.484	0.1064	0.9306	-0.886	-2.443	-3.302	-0.7117	0.699139	0.672655	0.377504	0.263176	0.772984
Q96P70	IPO9	1.441	0.5105	1.192	0.1653	1.237	0.09403	0.9306	-0.2491	-1.276	-0.2038	-1.347	0.149988	0.538994	0.05722	0.704171	0.131199
A0A7I2V5P2	GGH	0.08836	-0.8349	-0.02471	-1.516	-0.8261	-0.2752	0.9233	-0.1131	-1.605	-0.9145	-0.3636	0.149605	0.886703	0.065948	0.292963	0.63816
P49840	GSK3A	2.074	1.151	2.442	-0.1721	1.514	0.3951	0.923	0.3682	-2.246	-0.5603	-1.679	0.102245	0.309621	0.001268	0.530196	0.098637
Q9UEW8	STK39	-1.698	-2.62	-2.57	-3.847	-2.094	-1.249	0.9219	-0.8726	-2.15	-0.3965	0.4485	0.602221	0.597002	0.371239	0.810734	0.775701
K7EIZ6	DNMT1	-1.313	-2.234	-1.626	-0.9287	-0.9452	-1.189	0.9208	-0.3137	0.384	0.3675	0.1236	0.603329	0.644734	0.612294	0.498127	0.812804
O15085	ARHGEF11	0.3031	-0.6176	-0.5204	-0.5622	-0.8425	-0.3083	0.9207	-0.8235	-0.8653	-1.146	-0.6113	0.0335	0.009791	0.300299	0.011372	0.386651
A1KXE4	FAM168B	-2.33	-3.249	-4.511	-2.869	-3.649	-3.883	0.9186	-2.18	-0.5388	-1.318	-1.553	0.558091	0.122225	0.646589	0.317898	0.053329
F8W726	UBAP2L	4.449	3.531	2.386	2.461	3.961	1.745	0.9171	-2.062	-1.987	-0.4877	-2.703	0.320222	0.028667	0.051961	0.629119	0.009024
P04049	RAF1	-6.45	-7.366	-6.952	-4.549	-6.889	-6.914	0.9156	-0.502	1.901	-0.4391	-0.4637	0.086244	0.262405	0.154406	0.198438	0.356528
P30048	PRDX3	3.894	2.979	3.712	3.715	3.912	3.711	0.9152	-0.1826	-0.1794	0.01762	-0.1827	0.183497	0.163674	0.216364	0.894874	0.201836
C9J4M6	POLR2B	3.867	2.955	3.02	2.677	3.135	2.859	0.9117	-0.8466	-1.189	-0.732	-1.008	0.171631	0.232778	0.08959	0.202502	0.083895
P01112	HRAS	-4.451	-5.359	-5.914	-6.019	-5.3	-4.661	0.9085	-1.463	-1.569	-0.8492	-0.21	0.315637	0.236507	0.088862	0.397157	0.896393
Q96CN7	ISOC1	1.175	0.2673	1.349	1.263	1.639	1.544	0.9075	0.1737	0.08779	0.4644	0.3692	0.348136	0.623685	0.783807	0.215036	0.217915
Q05639	EEF1A2	1.424	0.5197	1.067	0.8607	1.29	0.9247	0.904	-0.357	-0.5629	-0.1341	-0.4989	0.219505	0.704197	0.448904	0.867343	0.455191
P49006	MARCKSL1	2.472	1.572	2.336	2.689	2.345	2.664	0.9006	-0.1362	0.2164	-0.1271	0.1914	0.004279	0.58247	0.362523	0.691251	0.370084
A0A7I2PIU1	CILK1	-3.187	-4.087	-6.924	-6.822	-5.605	-7.621	0.8997	-3.737	-3.635	-2.418	-4.434	0.661958	0.063346	0.068256	0.24317	0.035795
Q9H0B6	KLC2	1.342	0.4429	-0.819	0.2135	0.4429	-0.3636	0.8994	-2.161	-1.129	-0.8994	-1.706	0.284427	0.01005	0.099129	0.338664	0.08411
Q5VVH2	FKBP1C	-5.537	-6.435	-6.194	-6.281	-6.576	-6.649	0.8986	-0.6579	-0.7443	-1.04	-1.113	0.427043	0.537296	0.472883	0.265198	0.261997
Q96I99	SUCLG2	0.884	-0.01157	0.8571	0.5046	0.7448	0.479	0.8956	-0.02694	-0.3795	-0.1392	-0.405	0.101244	0.916708	0.40831	0.64404	0.183489
F5GX71	MPI	-0.1957	-1.091	-2.423	0.4181	-0.648	-0.1913	0.8948	-2.227	0.6137	-0.4523	0.004381	0.352942	0.034997	0.16461	0.477406	0.987162
J3KP36	WASHC2C	-6.249	-7.143	-6.81	-6.055	-6.296	-5.999	0.8941	-0.5614	0.1943	-0.04683	0.2497	0.258674	0.418864	0.85195	0.960568	0.743811
M16_RB_Myc_FLAG	M16_RB_Myc_FLAG	-5.231	-6.125	-6.439	-7.745	-6.315	-6.417	0.894	-1.208	-2.514	-1.084	-1.186	0.302435	0.106602	0.018037	0.226283	0.13427
E5RIW3	TBCA	4.676	3.782	4.613	4.345	4.888	4.914	0.893	-0.06294	-0.3302	0.2121	0.2385	0.400119	0.744841	0.082714	0.222239	0.182104
K7EML2	RBM42	-5.545	-6.437	-6.885	-1.123	-6.871	-6.23	0.8925	-1.34	0.394	-1.326	-0.6857	0.513206	0.24421	0.51389	0.248681	0.5411
A0A087WZR3	BRCC3	-4.157	-5.048	-1.916	-3.627	-5.23	-4.587	0.8905	2.241	0.5303	-1.072	-0.4301	0.581435	0.050549	0.660324	0.425293	0.681987
O15164	TRIM24	-1.269	-2.159	-0.6862	1.369	-0.9985	2.82	0.8904	0.5828	2.638	0.2705	4.089	0.632564	0.757015	0.270541	0.910371	0.072868
Q5T1J5	CHCHD2P9	1.036	0.1461	1.248	1.064	1.219	0.9977	0.8903	0.2111	0.02724	0.1823	-0.03872	0.439338	0.412529	0.929618	0.557818	0.890528
Q9HCU5	PREB	0.9758	0.08644	-0.2239	-0.6962	-1.887	0.3434	0.8893	-1.2	-1.672	-2.863	-0.6324	0.306755	0.129906	0.306613	0.239694	0.599132
Q99497	PARK7	5.93	5.042	4.474	5.74	5.562	5.168	0.8875	-1.456	-0.1892	-0.3675	-0.762	0.208027	0.029017	0.224137	0.131982	0.040009
Q9HD33	MRPL47	-0.7253	-1.611	-1.489	-1.39	-1.471	-0.6755	0.8858	-0.7638	-0.665	-0.7456	0.04976	0.390841	0.318263	0.417291	0.458235	0.959299
Q13523	PRPF4B	1.084	0.1995	0.9321	0.6997	0.2574	0.9026	0.8841	-0.1515	-0.384	-0.8262	-0.181	0.307762	0.742704	0.423742	0.119427	0.676878
P12694	BCKDHA	-3.643	-4.527	-3.767	-4.345	-2.917	-2.703	0.884	-0.1236	-0.7011	0.7261	0.9403	0.394804	0.841346	0.614025	0.436441	0.343905
Q8WUY8	NAT14	-6.256	-7.139	-6.674	-5.465	-4.764	-4.913	0.8839	-0.4182	0.7905	1.491	1.343	0.230397	0.622271	0.328025	0.198999	0.204941
Q8IVW6	ARID3B	-2.061	-2.943	-3.52	-1.403	-2.028	-3.736	0.8824	-1.459	0.6582	0.03248	-1.676	0.378251	0.05236	0.375945	0.964987	0.123878
O76071	CIAO1	0.2234	-0.6568	0.01488	0.01127	0.5573	-0.419	0.8802	-0.2085	-0.2121	0.3339	-0.6424	0.277533	0.430315	0.609063	0.197058	0.244057
Q15477	SKIV2L	0.01818	-0.8611	0.7669	-0.2392	0.5678	0.1143	0.8793	0.7487	-0.2574	0.5496	0.09613	0.385624	0.194948	0.555569	0.331008	0.868439
Q68CR8	PTPA	-1.342	-2.221	-1.707	-1.552	-1.389	-2.226	0.8792	-0.3659	-0.2109	-0.04798	-0.885	0.614314	0.542401	0.613585	0.927198	0.148096
H0YAW4	EIF3E	1.003	0.1245	1.151	1.128	0.9858	0.995	0.8784	0.1481	0.125	-0.01712	-0.00797	0.397601	0.693988	0.685564	0.937047	0.987952
A0A2R8YCT7	DTD1	0.3778	-0.4969	0.5479	0.8569	-0.8579	0.2811	0.8747	0.1702	0.4791	-1.236	-0.09667	0.406186	0.3689	0.038263	0.36991	0.746682
A0A087WW65	ABCB7	-1.245	-2.12	-2.481	-2.606	-1.799	-2.249	0.8746	-1.236	-1.361	-0.554	-1.004	0.147797	0.02514	0.109121	0.326254	0.065885
F5H5P2	F5H5P2	-3.643	-4.517	-3.767	-4.372	-2.917	-2.703	0.8735	-0.1236	-0.7289	0.7261	0.9403	0.397183	0.841346	0.603931	0.436441	0.343905
P62072	TIMM10	-1.225	-2.099	-3.258	-2.242	-1.844	-2.383	0.8732	-2.033	-1.017	-0.6186	-1.157	0.219333	0.030772	0.032479	0.365409	0.075237
P09211	GSTP1	4.732	3.86	5.048	5.44	5.096	4.373	0.8718	0.3154	0.7081	0.3636	-0.359	0.507803	0.649534	0.348444	0.634079	0.555532
Q8TDQ7	GNPDA2	-5.045	-5.916	-6.428	-6.061	-5.922	-4.591	0.8717	-1.384	-1.017	-0.8775	0.4541	0.583728	0.186788	0.354782	0.44341	0.667525
Q9BQT8	SLC25A21	-2.757	-3.629	-4.799	-3.691	-2.637	-2.559	0.8717	-2.042	-0.9336	0.1203	0.1984	0.495431	0.223941	0.507448	0.909651	0.892861
A0A087X1R4	WTAP	-6.077	-6.949	-5.819	-6.915	-6.6	-6.858	0.8715	0.2579	-0.8379	-0.5224	-0.7805	0.51641	0.8374	0.506648	0.697746	0.545371
G3V529	DDX24	2.299	1.428	0.9496	1.516	2.841	2.033	0.8714	-1.349	-0.783	0.5419	-0.2656	0.495295	0.077058	0.465056	0.397244	0.654681
Q8N357	SLC35F6	-3.275	-4.146	-4.626	-4.546	-4.234	-2.632	0.8704	-1.35	-1.27	-0.9581	0.6434	0.524806	0.26838	0.379929	0.489152	0.519872
Q9BRG1	VPS25	-2.361	-3.231	-2.097	-1.034	-4.396	-1.177	0.8697	0.2639	1.327	-2.035	1.184	0.528264	0.766442	0.104285	0.129428	0.094043
A0A024R571	EHD1	-2.049	-2.918	-0.3051	-4.095	-4.228	-3.723	0.8695	1.744	-2.046	-2.179	-1.674	0.527288	0.165701	0.080668	0.132353	0.379663
Q96EE3	SEH1L	1.895	1.026	0.893	1.619	1.332	2.024	0.8691	-1.002	-0.2763	-0.5631	0.129	0.246406	0.036265	0.598297	0.183455	0.806851
H3BUR4	NOB1	-0.3099	-1.179	0.009977	-1.269	-0.3304	-1.572	0.8689	0.3199	-0.9588	-0.02048	-1.262	0.461729	0.250038	0.014751	0.967311	0.155855
O95816	BAG2	1.859	0.9914	1.28	0.8338	0.9807	0.7118	0.868	-0.5797	-1.026	-0.8787	-1.148	0.161812	0.155909	0.131481	0.200391	0.111136
Q86WR0	CCDC25	-2.679	-3.544	-3.03	-4.106	-3.963	-2.657	0.8653	-0.3506	-1.427	-1.284	0.02206	0.522623	0.750028	0.140318	0.207537	0.98363
K7ERV3	TK1	0.4049	-0.4574	-1.175	-1.616	-0.2133	-0.7199	0.8624	-1.58	-2.021	-0.6182	-1.125	0.517708	0.040229	0.151062	0.406601	0.145521
A0A7P0TAG8	NAXE	1.115	0.2547	1.113	1.872	1.501	0.8536	0.8598	-0.001424	0.7571	0.3866	-0.261	0.45521	0.99727	0.023929	0.344641	0.489161
A0A590UJG2	MACF1	-3.368	-4.228	-5.279	-3.66	-3.639	-5.126	0.8594	-1.911	-0.2924	-0.2708	-1.758	0.491745	0.20195	0.829866	0.869535	0.249405
Q8N3U4	STAG2	-0.2274	-1.086	2.248	0.2937	0.0842	1.248	0.8585	2.476	0.5211	0.3116	1.475	0.367495	0.034691	0.557722	0.798671	0.1478
Q7Z7F7	MRPL55	-4.329	-5.187	-2.692	-6.149	-2.226	-2.883	0.8584	1.637	-1.82	2.103	1.446	0.625103	0.149327	0.15946	0.091009	0.318798
A0A6Q8PHN5	AARS1	0.7485	-0.1083	0.7706	0.8669	1.076	1.014	0.8568	0.02214	0.1185	0.3272	0.2658	0.347757	0.923613	0.618268	0.276957	0.197482
F8WAX8	MSH6	2.276	1.42	0.9726	1.364	1.908	1.769	0.856	-1.303	-0.9114	-0.3676	-0.5069	0.153154	0.04964	0.138874	0.623495	0.398734
Q99880	H2BC13	3.142	2.287	1.431	2.399	2.316	2.585	0.8553	-1.711	-0.7438	-0.827	-0.5579	0.385311	0.115651	0.513736	0.467265	0.522641
Q99879	H2BC14	3.142	2.287	1.431	2.399	2.316	2.585	0.8553	-1.711	-0.7438	-0.827	-0.5579	0.385311	0.115651	0.513736	0.467265	0.522641
Q99877	H2BC15	3.142	2.287	1.431	2.399	2.316	2.585	0.8553	-1.711	-0.7438	-0.827	-0.5579	0.385311	0.115651	0.513736	0.467265	0.522641
U3KQK0	H2BC15	3.142	2.287	1.431	2.399	2.316	2.585	0.8553	-1.711	-0.7438	-0.827	-0.5579	0.385311	0.115651	0.513736	0.467265	0.522641
P58876	H2BC5	3.142	2.287	1.431	2.399	2.316	2.585	0.8553	-1.711	-0.7438	-0.827	-0.5579	0.385311	0.115651	0.513736	0.467265	0.522641
Q86X76	NIT1	-1.257	-2.112	-1.676	-0.8333	-1.141	-1.323	0.8552	-0.4196	0.4236	0.1161	-0.06625	0.474518	0.186165	0.138624	0.789334	0.903089
P56556	NDUFA6	-0.6315	-1.485	-0.2458	-2.189	-0.8025	0.1742	0.8534	0.3857	-1.557	-0.171	0.8057	0.391422	0.505421	0.192916	0.354647	0.539783
P78540	ARG2	-2.272	-3.124	-4.91	-1.521	-4.193	-2.966	0.8519	-2.638	0.7513	-1.921	-0.6937	0.57914	0.021269	0.232815	0.05246	0.379987
Q9Y3S1	WNK2	1.05	0.1998	1.211	1.573	1.811	2.506	0.8502	0.1614	0.5225	0.7613	1.456	0.577599	0.905587	0.776107	0.543796	0.311326
A0A7P0TAN7	SLC3A2	0.8942	0.04432	0.2159	-1.18	-0.3064	-0.09828	0.8498	-0.6783	-2.074	-1.201	-0.9924	0.023299	0.057394	0.075756	0.036856	0.059133
O75526	RBMXL2	-1.764	-2.612	-4.406	-2.981	-3.765	-4.476	0.848	-2.642	-1.216	-2	-2.712	0.702939	0.246946	0.613341	0.38838	0.293844
J3KQN4	RPL36A	3.169	2.321	2.786	2.505	3.185	3.139	0.8473	-0.3823	-0.6632	0.01651	-0.0295	0.111359	0.217905	0.278259	0.952913	0.881624
Q8WVV9	HNRNPLL	-0.7843	-1.631	-0.6506	-0.6378	-0.9156	-1.394	0.8467	0.1337	0.1465	-0.1313	-0.61	0.233976	0.875114	0.801214	0.810718	0.293605
A0A0G2JKZ1	TAPBP	-3.585	-4.432	-6.007	-5.532	-4.621	-5.128	0.8461	-2.422	-1.946	-1.035	-1.542	0.616016	0.052178	0.102029	0.432248	0.286409
O95486	SEC24A	-0.8105	-1.655	-1.894	-0.4524	-2.356	-2.084	0.845	-1.083	0.3581	-1.545	-1.274	0.39089	0.145064	0.573902	0.14483	0.068654
P04183	TK1	0.5767	-0.268	-1.154	-0.6831	0.01309	-0.6681	0.8447	-1.73	-1.26	-0.5636	-1.245	0.501859	0.02146	0.124069	0.362362	0.080974
O95714	HERC2	2.504	1.66	3.5	3.038	1.701	3.056	0.8443	0.9956	0.5336	-0.8036	0.5515	0.366731	0.194944	0.487213	0.407564	0.441699
Q9Y2A7	NCKAP1	0.4805	-0.3636	-0.3616	-0.01838	0.0824	0.157	0.8441	-0.8421	-0.4989	-0.3981	-0.3235	0.128537	0.056419	0.355677	0.341399	0.420652
P45973	CBX5	0.8817	0.03846	1.68	0.9231	0.4402	1.104	0.8433	0.7979	0.04139	-0.4415	0.2227	0.361989	0.069983	0.851779	0.533625	0.264883
B8ZZJ0	SUMO1	-0.1874	-1.03	-1.93	-1.411	-0.2326	-0.3772	0.843	-1.743	-1.223	-0.04522	-0.1898	0.712583	0.299864	0.560147	0.975812	0.912567
A0A804HI07	CTNNA3	-0.4218	-1.264	0.143	-2.251	1.233	-0.4367	0.8422	0.5647	-1.829	1.655	-0.0149	0.348712	0.433766	0.241771	0.078553	0.983861
Q969Q0	RPL36AL	3.162	2.32	2.785	2.505	3.185	3.138	0.8418	-0.3765	-0.6568	0.02331	-0.02429	0.112683	0.223549	0.282195	0.933692	0.903237
A0A590UJA4	NNT	-4.419	-5.257	-5.371	-5.07	-1.77	-4.704	0.8383	-0.9526	-0.651	2.648	-0.2852	0.64858	0.508245	0.648783	0.083099	0.838482
F8WEW0	CAP2	1.365	0.5271	0.8169	0.6499	-1.711	1.121	0.838	-0.5482	-0.7152	-3.076	-0.2445	0.12196	0.05059	0.38018	0.022233	0.649008
O43290	SART1	1.583	0.7482	0.6879	0.4029	-0.1759	0.9444	0.8344	-0.8948	-1.18	-1.758	-0.6382	0.066519	0.15541	0.060325	0.115851	0.111624
P19105	MYL12A	3.307	2.473	2.722	3.821	3.307	3.028	0.8343	-0.585	0.5143	0.0003466	-0.279	0.10307	0.052933	0.181391	0.998851	0.305539
O14950	MYL12B	3.307	2.473	2.722	3.821	3.307	3.028	0.8343	-0.585	0.5143	0.0003466	-0.279	0.10307	0.052933	0.181391	0.998851	0.305539
P04179	SOD2	0.6393	-0.1928	-0.1502	-0.2881	-0.6007	-1.071	0.8321	-0.7895	-0.9274	-1.24	-1.711	0.06775	0.110333	0.045713	0.015914	0.009444
B1AL05	MRPL43	-0.09731	-0.9283	-0.5336	-0.3114	-0.5231	-0.1066	0.831	-0.4363	-0.2141	-0.4258	-0.009332	0.119303	0.445311	0.653991	0.357555	0.98321
Q96CS3	FAF2	-0.4235	-1.252	0.9097	0.8905	-0.6117	0.3025	0.8287	1.333	1.314	-0.1882	0.7259	0.498297	0.141678	0.169696	0.887779	0.340194
P08865	RPSA	5.811	4.985	5.485	6.236	5.927	5.964	0.826	-0.326	0.4257	0.116	0.1538	0.250612	0.236527	0.035456	0.72518	0.53163
Q9UMS0	NFU1	2.208	1.382	2.291	2.744	3.295	2.466	0.8256	0.08311	0.536	1.087	0.2579	0.494479	0.933965	0.656434	0.319442	0.814769
A0A2R8YD14	RPS24	3.39	2.567	2.589	3.225	3.262	3.316	0.8231	-0.8016	-0.1654	-0.1287	-0.07406	0.159223	0.048293	0.626702	0.703358	0.850206
Q9Y570	PPME1	1.379	0.5563	0.9799	0.9557	0.634	1.549	0.8226	-0.3991	-0.4232	-0.745	0.1698	0.097161	0.185133	0.195951	0.175128	0.618372
P00441	SOD1	6.07	5.247	5.997	6.033	6.138	6.184	0.8226	-0.0725	-0.03661	0.0686	0.1147	0.442586	0.608275	0.838728	0.627795	0.389583
Q93034	CUL5	-0.09952	-0.9216	-1.781	-1.998	-3.163	-1.281	0.822	-1.682	-1.899	-3.063	-1.182	0.562156	0.042951	0.031883	0.002183	0.24072
B1AH49	MPST	-0.1308	-0.9526	0.4535	-0.01734	0.07698	0.7123	0.8217	0.5843	0.1135	0.2078	0.8431	0.083188	0.244622	0.794523	0.814189	0.22492
D6RAH7	UBE2D3	3.163	2.343	1.861	2.471	1.524	1.342	0.8194	-1.302	-0.6915	-1.639	-1.821	0.205308	0.000144	0.19254	0.012883	0.000275
Q9BW71	HIRIP3	0.04629	-0.7724	-0.8333	-1.224	-0.1618	0.412	0.8187	-0.8795	-1.27	-0.2081	0.3657	0.415084	0.097975	0.196763	0.692775	0.42041
A0A0A6YYI3	PPAN-P2RY11	1.23	0.4111	-0.2727	-0.2821	-0.6334	0.01602	0.8185	-1.502	-1.512	-1.863	-1.214	0.079779	0.090803	0.007982	0.035673	0.013759
Q9NQR4	NIT2	0.3448	-0.4734	-0.1309	0.05657	-0.8966	-0.2745	0.8182	-0.4757	-0.2882	-1.241	-0.6192	0.280471	0.31961	0.375819	0.131002	0.205671
A0A087WU26	RRBP1	0.9179	0.101	0.6149	1.418	1.314	1.376	0.8169	-0.303	0.4998	0.3962	0.458	0.245133	0.565467	0.367406	0.412125	0.423981
O15260	SURF4	-0.898	-1.713	-0.2748	-1.516	-1.841	-0.8586	0.8153	0.6232	-0.6182	-0.9432	0.03935	0.243151	0.033484	0.309093	0.200374	0.932131
Q641Q2	WASHC2A	6.045	5.234	6.315	6.075	6.189	6.208	0.8113	0.2697	0.02949	0.1436	0.1632	0.549767	0.743566	0.976525	0.886023	0.868627
Q5VTL8	PRPF38B	-0.2131	-1.021	0.02207	-0.8281	-1.595	-1.287	0.8083	0.2352	-0.615	-1.382	-1.074	0.391833	0.545414	0.311699	0.231383	0.048738
P62837	UBE2D2	3.145	2.338	1.576	2.464	1.517	1.32	0.8073	-1.569	-0.6812	-1.628	-1.825	0.210595	7.2e-05	0.199977	0.012635	0.000247
Q6P587	FAHD1	-0.697	-1.503	-0.6637	-0.5752	-0.5412	-0.4971	0.8062	0.03328	0.1218	0.1558	0.1999	0.162524	0.881482	0.823991	0.51877	0.476142
Q5C9Z4	NOM1	-1.233	-2.039	-2.862	-5.187	-3.775	-2.805	0.8061	-1.628	-3.954	-2.542	-1.572	0.555544	0.3033	0.023177	0.095866	0.365657
Q32MK0	MYLK3	-0.2999	-1.105	0.02321	-0.4977	-1.28	-0.5104	0.8046	0.3232	-0.1978	-0.98	-0.2104	0.35563	0.509053	0.769485	0.146501	0.732748
H7BZ11	RPL36A-HNRNPH2	3.108	2.304	2.759	2.453	3.172	3.077	0.8044	-0.3489	-0.6551	0.06415	-0.0308	0.11967	0.240854	0.277666	0.817532	0.877017
Q5QNW6	H2BC18	3.145	2.341	1.432	2.399	2.317	2.59	0.804	-1.712	-0.7458	-0.8274	-0.5552	0.412378	0.115638	0.51277	0.46739	0.524728
Q93079	H2BC9	3.145	2.341	1.432	2.399	2.317	2.59	0.804	-1.712	-0.7458	-0.8274	-0.5552	0.412378	0.115638	0.51277	0.46739	0.524728
J3QL20	CLTC	1.386	0.583	2.088	1.733	1.747	1.756	0.8031	0.7017	0.3467	0.3606	0.3696	0.649127	0.206917	0.527751	0.550778	0.592598
P14859	POU2F1	-0.5269	-1.33	-1.535	-6.23	-0.9025	-3.825	0.8031	-1.008	-5.703	-0.3756	-3.298	0.519338	0.432896	0.004929	0.789067	0.048312
E9PHT6	PANK4	-0.4349	-1.238	-1.083	-0.708	-1.064	-0.2554	0.803	-0.6478	-0.2731	-0.6288	0.1795	0.341394	0.293906	0.617866	0.392358	0.752536
Q6I9Y2	THOC7	-0.728	-1.531	-1.095	-0.6463	-2.169	-1.972	0.8026	-0.3675	0.08174	-1.441	-1.244	0.31744	0.438467	0.75881	0.016134	0.19176
P17252	PRKCA	-0.008581	-0.8111	-0.1386	0.3482	-0.2549	-0.363	0.8025	-0.1301	0.3568	-0.2463	-0.3544	0.112362	0.754559	0.463739	0.763811	0.421612
Q9NQ48	LZTFL1	-0.2596	-1.061	0.02662	-3.753	0.192	-0.8159	0.8015	0.2862	-3.493	0.4516	-0.5563	0.445659	0.558094	0.047096	0.491785	0.27265
Q9NPD3	EXOSC4	-3.694	-4.494	-2.782	-4.332	-1.124	-3.003	0.7999	0.9119	-0.6385	2.569	0.6911	0.360147	0.067562	0.508047	0.040448	0.710395
P43686	PSMC4	4.181	3.381	2.951	3.645	3.508	3.65	0.7998	-1.229	-0.5361	-0.6728	-0.5308	0.182153	0.024444	0.222821	0.141791	0.249713
O14802	POLR3A	2.947	2.149	0.08535	1.331	1.848	1.727	0.7986	-2.862	-1.616	-1.099	-1.221	0.421112	0.02364	0.148122	0.38414	0.249942
Q86UV5	USP48	-2.732	-3.53	-1.416	-1.768	-3.337	-4.333	0.7981	1.316	0.9639	-0.605	-1.602	0.412384	0.142263	0.27209	0.64817	0.113009
Q16222	UAP1	-0.17	-0.9673	-1.172	-1.896	-0.7507	-0.8394	0.7972	-1.002	-1.726	-0.5807	-0.6693	0.046544	0.038839	0.061234	0.443671	0.137407
P61956	SUMO2	-0.3356	-1.132	-0.3008	-1.403	-0.9934	-0.2683	0.7962	0.03479	-1.068	-0.6578	0.06735	0.576073	0.942925	0.598707	0.540976	0.920489
Q86XL3	ANKLE2	1.611	0.815	0.0733	-0.9318	1.022	-0.8696	0.7957	-1.537	-2.542	-0.589	-2.48	0.537952	0.013247	0.000375	0.546366	0.000568
A0A0D9SEI7	MYCBP	-5.668	-6.461	-2.463	-5.29	-2.596	-3.57	0.7937	3.205	0.3775	3.072	2.098	0.510952	0.035921	0.825249	0.103192	0.168229
P78330	PSPH	0.5916	-0.1988	0.6111	0.4385	0.4898	-0.3547	0.7904	0.01954	-0.1531	-0.1018	-0.9462	0.226363	0.948569	0.616249	0.757028	0.021042
Q9H936	SLC25A22	-1.956	-2.744	-2.425	-3.192	-3.971	-2.833	0.7882	-0.4695	-1.236	-2.015	-0.8766	0.225119	0.265637	0.159012	0.175358	0.216902
H0YN88	RPS17	3.472	2.686	2.489	3.105	3.145	3.257	0.786	-0.9831	-0.3665	-0.3269	-0.2151	0.193044	0.100405	0.510502	0.588179	0.624389
Q7Z4H7	HAUS6	-0.8656	-1.651	-2.451	-2.524	-1.308	-2.532	0.7858	-1.585	-1.658	-0.4427	-1.667	0.340864	0.071285	0.086216	0.668408	0.147941
Q86TU7	SETD3	-5.107	-5.892	-2.23	-4.845	-2.793	-2.275	0.7851	2.877	0.262	2.314	2.833	0.639058	0.055351	0.893306	0.128681	0.14675
F8VSA6	NEDD8	2.316	1.533	2.658	2.604	2.081	2.834	0.7831	0.3423	0.2877	-0.2355	0.5177	0.324603	0.29199	0.358278	0.439435	0.271886
Q9C037	TRIM4	4.355	3.572	4.605	4.334	3.647	3.957	0.7824	0.2501	-0.02055	-0.7083	-0.3983	0.458145	0.459803	0.935351	0.209678	0.244399
A0A3B3ITT1	RAB12	0.612	-0.1667	1.039	0.5044	-6.842	0.9806	0.7787	0.4273	-0.1077	-0.03069	0.3685	0.434202	0.419617	0.85	0.657912	0.428471
H0YKN4	ANXA2	3.127	2.35	2.485	3.016	3.129	2.707	0.7772	-0.6417	-0.1107	0.001991	-0.4197	0.445649	0.138006	0.695369	0.994577	0.161219
P48668	KRT6C	-5.863	-6.639	-6.38	-6.57	-4.966	-6.659	0.7759	-0.5165	-0.7064	0.8976	-0.7955	0.359207	0.562314	0.415936	0.565729	0.341256
P16949	STMN1	4.665	3.891	4.678	5.139	5.203	4.914	0.7738	0.01345	0.4744	0.5378	0.2488	0.231161	0.963336	0.038836	0.111776	0.268173
C9JQD4	PPIH	1.054	0.2808	0.9663	0.3313	1.54	0.7143	0.7731	-0.08761	-0.7226	0.4864	-0.3396	0.317452	0.723445	0.047086	0.16026	0.134495
O14641	DVL2	-0.9107	-1.683	-0.7014	-1.228	-0.7744	-2.146	0.7721	0.2093	-0.3173	0.1363	-1.235	0.223142	0.716093	0.601088	0.810147	0.065428
Q9Y314	NOSIP	-0.8395	-1.611	-1.186	-2.211	-0.8443	-1.321	0.7713	-0.3469	-1.371	-0.004738	-0.4815	0.648733	0.524582	0.015419	0.993283	0.456706
H0YNJ8	TMOD3	1.24	0.4705	1.483	-6.822	1.492	-4.219	0.7697	0.2429	-0.3916	0.2513	2.211	0.286946	0.500143	0.4679	0.596736	0.108127
Q9UMY1	NOL7	-1.731	-2.498	-1.687	-1.669	-3.893	-2.064	0.7663	0.04402	0.06233	-2.162	-0.3325	0.650933	0.910892	0.884986	0.166138	0.635681
Q6EEV6	SUMO4	1.868	1.102	-0.00956	0.8889	1.36	1.816	0.7661	-1.878	-0.9792	-0.5083	-0.05223	0.334401	0.156898	0.442858	0.559006	0.910593
P48426	PIP4K2A	-3.611	-4.377	-2.438	-4.03	-3.018	-2.994	0.7654	1.173	-0.4182	0.5936	0.6169	0.682249	0.459965	0.822117	0.742252	0.706593
F8WCF2	EIF4G1	1.852	1.087	2.593	2.523	2.35	2.892	0.7643	0.7412	0.6711	0.4988	1.041	0.257417	0.259917	0.180962	0.426198	0.153414
P28070	PSMB4	1.703	0.9397	1.306	1.953	0.747	1.21	0.7632	-0.397	0.2505	-0.9559	-0.4925	0.516307	0.531207	0.706049	0.24584	0.658559
Q96L21	RPL10L	-0.9589	-1.721	0.5834	-0.3488	-2.607	0.7037	0.7623	1.542	0.6101	-1.649	1.663	0.51396	0.175189	0.481995	0.273449	0.081766
E9PMW7	EEF1D	1.013	0.2517	-2.936	-0.6506	-2.076	-1.618	0.7617	-3.949	-1.664	-3.09	-2.632	0.443013	0.069598	0.137452	0.027822	0.041559
Q9BUL8	PDCD10	-2.238	-2.996	-1.78	-2.179	-2.144	-1.226	0.7581	0.4578	0.05886	0.09383	1.012	0.680026	0.664284	0.966015	0.928124	0.373756
A0A7P0T901	ALG5	-1.931	-2.688	-3.671	-2.344	-2.825	-2.034	0.7569	-1.74	-0.4129	-0.8939	-0.1029	0.423749	0.033126	0.482976	0.449636	0.839147
P08621	SNRNP70	1.51	0.7535	0.7243	0.9666	0.2444	1.051	0.7562	-0.7854	-0.543	-1.265	-0.4589	0.248322	0.209144	0.435477	0.27341	0.51617
A0A669KBK2	MLH1	-2.037	-2.793	-0.9113	-1.342	-1.648	-1.987	0.7555	1.126	0.6953	0.3891	0.0506	0.606579	0.330052	0.60371	0.779668	0.965516
O75152	ZC3H11A	-0.1752	-0.9304	0.6902	-0.5684	-0.06006	0.08909	0.7551	0.8654	-0.3931	0.1152	0.2643	0.37231	0.249567	0.76202	0.865319	0.540342
A0A6Q8PGU6	SPATA5	1.876	1.123	2.454	2.547	1.798	1.829	0.7531	0.5771	0.6706	-0.07816	-0.04769	0.635714	0.417567	0.423621	0.928121	0.944364
O43715	TRIAP1	-1.722	-2.474	-2.012	-1.985	-1.815	-1.855	0.7522	-0.2896	-0.2626	-0.09269	-0.1328	0.250103	0.532712	0.54014	0.89966	0.881127
Q9BYB4	GNB1L	-5.627	-6.377	-2.822	-3.647	-4.313	-3.726	0.7493	2.805	1.98	1.315	1.901	0.553674	0.017287	0.129134	0.338078	0.180507
I3L359	CORO7	-0.09549	-0.84	-1.403	-1.604	-0.08727	-1.256	0.7445	-1.308	-1.509	0.008219	-1.16	0.424698	0.010752	0.023925	0.990198	0.058944
Q9Y3C8	UFC1	1.257	0.5137	1.214	1.119	1.364	0.9412	0.7433	-0.04255	-0.1377	0.1074	-0.3158	0.346296	0.841535	0.429533	0.439442	0.180152
Q9UBB9	TFIP11	0.6582	-0.08432	0.4917	-0.4901	0.9695	0.7117	0.7426	-0.1665	-1.148	0.3113	0.05351	0.031027	0.738833	0.099573	0.631473	0.909607
Q9NYJ1	COA4	-0.05635	-0.7988	-1.278	-1.374	-0.7568	-0.5679	0.7424	-1.221	-1.317	-0.7004	-0.5115	0.392997	0.002351	0.056252	0.276586	0.080772
Q6DD87	ZNF787	-0.7417	-1.483	-3.107	-1.885	-0.9373	-1.844	0.7411	-2.365	-1.143	-0.1956	-1.102	0.44836	0.118897	0.411267	0.769267	0.460461
K7ES42	SAFB	2.515	1.774	1.107	2.862	2.474	2.236	0.7406	-1.409	0.3467	-0.04113	-0.2793	0.184373	0.085093	0.25496	0.911369	0.425987
J3KNE0	RGPD3	-0.9235	-1.664	-0.8089	-0.769	-0.6425	-3.01	0.7403	0.1146	0.1545	0.281	-2.086	0.723342	0.907152	0.887398	0.785518	0.292494
Q92905	COPS5	0.2701	-0.4683	-0.04468	-0.7098	-0.04841	-0.7399	0.7384	-0.3147	-0.9799	-0.3185	-1.01	0.14676	0.583821	0.029888	0.376671	0.030634
O43823	AKAP8	0.5654	-0.1726	-0.3068	-0.8926	-1.394	-0.3743	0.738	-0.8723	-1.458	-1.959	-0.9397	0.010936	0.025411	0.045077	0.066115	0.140075
P20645	M6PR	1.059	0.3219	1.056	0.9765	1.073	0.9671	0.7368	-0.003028	-0.08217	0.01434	-0.09157	0.278122	0.980115	0.757964	0.948018	0.656568
Q9NQT5	EXOSC3	0.3218	-0.4145	1.209	0.569	0.2316	0.7613	0.7363	0.8874	0.2472	-0.09017	0.4396	0.288059	0.039697	0.468299	0.85574	0.18802
Q02880	TOP2B	1.962	1.226	2.56	0.9289	0.929	2.69	0.7358	0.5987	-1.033	-1.033	0.7285	0.142716	0.100662	0.026209	0.039669	0.11186
P07205	PGK2	-3.825	-4.561	-3.826	-3.061	-2.867	-4.588	0.7353	-0.000356	0.764	0.9589	-0.7624	0.498895	0.999693	0.182348	0.310711	0.603289
A0A087WZG9	PEG10	1.859	1.124	1.383	1.193	0.7355	0.5744	0.7346	-0.4756	-0.666	-1.123	-1.284	0.352345	0.531742	0.377235	0.203026	0.147879
D6RC18	ISY1	-1.619	-2.353	-1.304	-1.761	-1.123	-0.7161	0.7341	0.3149	-0.1418	0.4962	0.9029	0.593793	0.553518	0.817008	0.498373	0.061868
Q15149	PLEC	2.53	1.796	2.755	1.331	2.165	2.614	0.7339	0.2249	-1.199	-0.3651	0.08459	0.323477	0.420898	0.002527	0.443606	0.791986
E9PS41	WDR74	-4.67	-5.399	-7.907	-6.825	-6.276	-6.894	0.7291	-3.237	-2.155	-1.606	-2.224	0.6722	0.020589	0.079477	0.186702	0.198909
Q06124	PTPN11	0.4338	-0.2952	-0.4422	0.07065	0.3936	-0.0473	0.729	-0.876	-0.3631	-0.0402	-0.4811	0.356573	0.016948	0.284434	0.871281	0.08872
Q9H3P7	ACBD3	0.5473	-0.1813	0.1715	-0.5235	0.03753	-0.2076	0.7287	-0.3758	-1.071	-0.5098	-0.7549	0.380338	0.555541	0.14372	0.400786	0.307278
P61024	CKS1B	0.1296	-0.5974	-0.3854	-0.3582	-0.6482	0.04501	0.727	-0.5149	-0.4878	-0.7778	-0.08459	0.475991	0.440326	0.537414	0.335839	0.8851
P49247	RPIA	-1.34	-2.067	-0.7567	-1.363	-1.065	-1.349	0.7263	0.5836	-0.02305	0.2753	-0.008624	0.283712	0.135432	0.960895	0.512121	0.988506
Q70CQ2	USP34	1.997	1.271	2.91	1.434	2.415	2.559	0.7261	0.9132	-0.5632	0.4184	0.5618	0.319374	0.056433	0.125901	0.636931	0.025361
Q9BXJ9	NAA15	2.406	1.682	2.714	1.434	1.908	2.416	0.7247	0.3079	-0.9722	-0.4986	0.009773	0.08082	0.567943	0.05197	0.383615	0.982529
P40855	PEX19	-0.7986	-1.523	-1.415	-1.875	-1.24	-1.526	0.7241	-0.6167	-1.076	-0.4411	-0.7271	0.411529	0.400454	0.294578	0.537407	0.288454
P62701	RPS4X	4.633	3.909	4.287	4.526	4.717	4.571	0.7237	-0.3459	-0.1065	0.08493	-0.06154	0.265144	0.06524	0.518288	0.56881	0.703844
O75781	PALM	-1.792	-2.515	-1.632	-1.882	-1.859	-2.287	0.7233	0.1599	-0.09044	-0.06721	-0.4951	0.379366	0.793167	0.896305	0.855084	0.449834
P35527	KRT9	1.899	1.176	1.118	2.052	2.627	0.7406	0.7228	-0.7801	0.1535	0.7281	-1.158	0.130061	0.16243	0.65547	0.091963	0.113457
D6RF48	STX18	-6.404	-7.126	-2.323	-4.024	-6.796	-2.594	0.7217	4.081	2.381	-0.3923	3.81	0.315036	0.003798	0.210871	0.529494	0.022368
Q8IZH2	XRN1	1.082	0.3613	-1.012	-0.4818	-1.351	0.2298	0.7207	-2.094	-1.564	-2.433	-0.8523	0.154638	0.005328	1.6e-05	0.013902	0.209061
Q13733	ATP1A4	-2.611	-3.329	-0.2105	-2.44	-1.645	-4.797	0.7182	2.4	0.1703	0.9653	-2.186	0.653156	0.071677	0.887014	0.518693	0.202865
P19087	GNAT2	-1.913	-2.631	-1.414	-2.921	-3.275	-2.347	0.7182	0.4985	-1.009	-1.363	-0.4347	0.552529	0.626937	0.454478	0.341715	0.655756
H0YM76	WDR61	-4.094	-4.81	-1.669	-1.221	-2.754	-5.73	0.7157	2.425	2.873	1.34	-1.636	0.683653	0.146954	0.114942	0.434935	0.320723
Q8NHP8	PLBD2	-1.598	-2.313	-1.149	-3.632	-2.862	-2.746	0.7148	0.4493	-2.034	-1.264	-1.148	0.305721	0.480008	0.012876	0.300906	0.373617
O15118	NPC1	-0.8684	-1.582	-2.635	-2.445	-1.529	-0.03796	0.7138	-1.767	-1.577	-0.6605	0.8304	0.334577	0.057569	0.273279	0.431671	0.612866
H3BTB3	DDX19A	0.9586	0.2458	1.333	1.077	1.78	1.364	0.7128	-0.2977	0.118	0.8209	-0.2668	0.580443	0.331148	0.652716	0.030061	0.269346
M0R3H0	RPS16	4.056	3.343	3.713	3.932	3.958	3.881	0.7126	-0.3427	-0.1238	-0.09801	-0.1749	0.333958	0.26225	0.512069	0.63231	0.378205
J3KPT4	TRABD	0.4466	-0.2656	0.6353	0.3842	-0.06936	-0.5359	0.7123	0.1887	-0.06241	-0.516	-0.9825	0.64407	0.84318	0.967863	0.708746	0.323367
Q9NYL9	TMOD3	-6.431	-7.142	-6.669	1.129	-6.695	0.731	0.7113	-0.238	-0.1108	-0.2645	-0.5093	0.287929	0.844966	0.827942	0.68203	0.159837
Q68D06	SLFN13	-2.336	-3.045	-3.703	-4.086	-3.962	-1.838	0.709	-1.367	-1.75	-1.626	0.4979	0.678743	0.452562	0.31901	0.380137	0.723895
E7ENZ3	CCT5	6.151	5.442	5.372	5.752	5.71	6.024	0.7082	-0.7785	-0.3984	-0.4403	-0.1267	0.163672	0.080487	0.332264	0.196465	0.694801
Q15437	SEC23B	-1.229	-1.936	-2.175	-2.278	-1.125	-1.636	0.7076	-0.9461	-1.049	0.1036	-0.4072	0.382463	0.134662	0.060621	0.839085	0.357952
F5GWY6	ELP2	-3.18	-3.886	-2.282	-3.907	-2.102	-2.432	0.7064	0.898	-0.7273	1.078	0.7474	0.644097	0.398898	0.656126	0.327347	0.548188
Q9Y266	NUDC	3.625	2.92	3.933	2.22	2.326	3.151	0.7053	0.3073	-1.405	-1.3	-0.4741	0.428291	0.599444	0.041535	0.104072	0.517911
A0A2U3TZH4	PDLIM3	-2.909	-3.614	-3.431	-3.591	-3.113	-2.461	0.7053	-0.5224	-0.6823	-0.2046	0.4477	0.578279	0.65632	0.651353	0.895506	0.778835
P20339	RAB5A	-1.132	-1.837	-1.857	-1.217	-1.519	-1.962	0.7048	-0.7249	-0.08557	-0.3874	-0.8306	0.726324	0.483542	0.917048	0.779276	0.511855
Q96EY1	DNAJA3	-0.3871	-1.09	-0.7343	-1.537	-1.108	-2.409	0.7027	-0.3472	-1.15	-0.721	-2.022	0.579889	0.784497	0.45656	0.590776	0.123302
A0A669KB38	DNAH10	2.438	1.736	3.092	3.036	2.482	3.028	0.7024	0.6541	0.5978	0.04326	0.5898	0.327834	0.068576	0.10693	0.926333	0.051121
O60568	PLOD3	2.894	2.193	0.9229	0.9775	2.188	2.102	0.7009	-1.971	-1.916	-0.7062	-0.7916	0.100421	0.029744	0.065062	0.209895	0.189606
Q8N6M0	OTUD6B	0.6779	-0.02175	-0.6453	-5.973	-3.535	-4.773	0.6996	-1.323	-6.651	-4.213	-5.451	0.488347	0.185855	0.000469	0.106555	0.001766
Q08378	GOLGA3	0.3523	-0.3466	0.3977	0.4248	1.057	0.4519	0.6988	0.04543	0.07255	0.7043	0.09962	0.403027	0.946471	0.917688	0.330061	0.880737
F8VZV6	MON2	-4.094	-4.792	-6.766	-6.539	-3.921	-5.97	0.6979	-2.673	-2.445	0.1729	-1.876	0.652121	0.091034	0.112697	0.921452	0.201444
Q9BSY4	CHCHD5	-1.367	-2.063	-2.035	-1.806	-2.58	-1.072	0.6962	-0.6684	-0.439	-1.213	0.2948	0.594818	0.022469	0.360426	0.215092	0.180739
Q9H1A4	ANAPC1	0.7288	0.03532	0.5589	-0.8091	0.361	-0.2494	0.6935	-0.1699	-1.538	-0.3677	-0.9781	0.441319	0.473654	0.006936	0.311605	0.10227
O14983	ATP2A1	0.2986	-0.3935	0.194	-3.254	-1.575	-0.2276	0.6921	-0.1046	-3.552	-1.873	-0.5262	0.647585	0.917146	0.048218	0.287562	0.650649
Q9NQ50	MRPL40	-1.933	-2.624	-2.267	-2.028	-3.184	-1.799	0.6914	-0.3348	-0.09568	-1.251	0.134	0.186802	0.341977	0.735463	0.08752	0.703319
A0A5F9ZHJ0	ACAT1	2.755	2.064	2.638	2.438	2.698	2.278	0.6911	-0.1168	-0.317	-0.05718	-0.4767	0.372177	0.659332	0.097008	0.850104	0.119883
Q5VTR2	RNF20	1.559	0.8693	0.9841	0.7239	0.7984	0.2544	0.6901	-0.5753	-0.8355	-0.761	-1.305	0.072241	0.211013	0.094867	0.124397	0.025012
P07099	EPHX1	0.4658	-0.2228	0.06732	0.4419	0.1821	-0.1005	0.6886	-0.3985	-0.02388	-0.2837	-0.5663	0.038215	0.133507	0.973943	0.591686	0.095717
Q9UQR0	SCML2	0.275	-0.413	0.3541	-0.793	-1.376	-0.7862	0.6881	0.07901	-1.068	-1.651	-1.061	0.409172	0.828152	0.03744	0.202403	0.175425
Q709C8	VPS13C	2.042	1.355	2.649	2.985	1.78	2.638	0.6872	0.6071	0.9433	-0.2618	0.5966	0.452337	0.165294	0.049537	0.686932	0.314998
Q8WXI7	MUC16	2.722	2.035	2.646	2.321	2.09	3.573	0.687	-0.07588	-0.4012	-0.632	0.8512	0.059055	0.820429	0.345382	0.111982	0.05848
Q13428	TCOF1	0.08977	-0.5954	-0.05675	-0.1925	0.4172	-0.07825	0.6852	-0.1465	-0.2823	0.3274	-0.168	0.376698	0.590784	0.316104	0.294512	0.561038
O75947	ATP5PD	2.466	1.781	2.032	1.624	2.158	2.168	0.6851	-0.4338	-0.8422	-0.3084	-0.2986	0.170111	0.242413	0.062052	0.248534	0.347785
Q8IWY7	TTBK2	-2.289	-2.974	-1.52	-1.446	-3.86	-4.941	0.6841	0.7694	0.8433	-1.571	-2.652	0.705068	0.459437	0.60633	0.353907	0.051081
A0A3B3IT39	SELENOF	-0.2777	-0.9612	2.47	-1.18	-1.153	-1.205	0.6835	2.748	-0.9024	-0.8751	-0.9272	0.541282	0.002234	0.246041	0.481784	0.225958
O60927	PPP1R11	-2.826	-3.509	-4.852	-5.853	-5.169	-3.48	0.6833	-2.026	-1.966	-2.344	-0.6541	0.28879	0.133007	0.034363	0.038157	0.649963
Q5RKV6	EXOSC6	-0.5093	-1.191	-0.684	-0.821	-0.3717	-0.6491	0.6814	-0.1747	-0.3117	0.1376	-0.1397	0.463752	0.385224	0.278704	0.407361	0.398007
P21359	NF1	0.5824	-0.09849	0.1517	0.2279	-0.416	0.9192	0.6809	-0.4307	-0.3545	-0.9983	0.3368	0.212315	0.439281	0.818024	0.10197	0.689929
Q14692	BMS1	0.4483	-0.2325	-0.5427	-0.4011	-0.2981	-0.4926	0.6808	-0.9911	-0.8494	-0.7464	-0.9409	0.21267	0.0688	0.198139	0.31922	0.068944
Q02750	MAP2K1	1.53	0.8499	0.6696	1.239	1.025	1.321	0.6802	-0.8604	-0.2911	-0.5054	-0.2087	0.091903	0.020635	0.286947	0.161093	0.549808
A6NMQ1	POLA1	0.6351	-0.04493	-0.2155	-0.3446	-0.07588	0.6516	0.68	-0.8506	-0.9797	-0.711	0.0165	0.104016	0.127738	0.09495	0.322249	0.959658
B4DDQ3	DNM1L	-0.792	-1.471	1.214	0.6218	-2.18	0.2329	0.679	2.006	1.414	-1.388	1.025	0.707901	0.067589	0.188171	0.284755	0.287624
B4DPZ9	DNM1L	-0.792	-1.471	1.214	0.6475	-2.18	0.2329	0.679	2.006	1.156	-1.388	1.025	0.707901	0.067589	0.21779	0.284755	0.287624
A0A7P0T9N9	ACAD9	-0.1336	-0.8125	0.2936	-0.442	0.5773	-0.03403	0.6789	0.4272	-0.3085	0.7109	0.09956	0.197271	0.105973	0.473654	0.13081	0.786432
E7ERY9	ATP2B1	-6.246	-6.924	-6.812	-5.584	-7.152	-7.237	0.6782	-0.5661	0.6622	-0.9055	-0.9908	0.394589	0.460611	0.561849	0.282006	0.259133
B4DXM2	EPHA6	-2.991	-3.669	-3.948	-2.659	-3.639	-0.8578	0.6778	-0.9568	0.3322	-0.6476	2.133	0.618934	0.381175	0.814846	0.63011	0.06175
A0A1B0GVK1	ARID1B	-4.419	-5.097	-5.862	-6.525	-6.372	-6.732	0.6772	-1.442	-2.105	-1.953	-2.313	0.701775	0.350511	0.111577	0.14209	0.087815
A0A087WU06	TUBGCP3	-5.215	-5.892	-5.855	-4.686	-4.253	-4.077	0.6764	-0.6401	0.5292	0.9627	1.138	0.497973	0.555889	0.659123	0.296796	0.40422
Q99459	CDC5L	1.943	1.267	2.362	2.34	1.585	2.373	0.6756	0.4194	0.3969	-0.3582	0.4301	0.188579	0.240857	0.320636	0.292828	0.238677
H7C3P4	GNS	2.505	1.829	1.938	1.816	1.335	1.79	0.6753	-0.5669	-0.6887	-1.169	-0.7152	0.110414	0.052536	0.026431	0.055715	0.062192
Q04760	GLO1	4.916	4.241	4.642	4.351	4.516	4.137	0.6749	-0.2736	-0.5647	-0.3997	-0.779	0.07457	0.450581	0.05033	0.12363	0.031157
E7ESY4	MTA1	1.045	0.3731	-0.6437	-0.2174	0.4068	-1.231	0.6723	-1.689	-1.263	-0.6387	-2.277	0.502403	0.024869	0.180084	0.42526	0.033901
A8MUD9	RPL7	4.315	3.644	4.336	4.198	4.265	3.805	0.6718	0.02077	-0.117	-0.05019	-0.5106	0.284742	0.937446	0.549397	0.823567	0.06442
Q9BT09	CNPY3	0.5441	-0.1274	-0.08259	0.3532	0.09484	0.7134	0.6716	-0.6267	-0.1909	-0.4493	0.1693	0.351337	0.431885	0.789663	0.569887	0.820051
D6RGJ4	G3BP2	-1.601	-2.271	-1.904	-3.029	-2.419	-1.362	0.6708	-0.3033	-1.428	-0.818	0.2386	0.476308	0.601354	0.135294	0.11245	0.670849
P51571	SSR4	0.9029	0.2325	-0.5249	0.5891	0.09301	0.3314	0.6704	-1.428	-0.3138	-0.8099	-0.5715	0.03209	0.037725	0.559551	0.315509	0.045135
H0Y8K0	HSPA9	2.299	1.63	1.88	1.825	1.602	2.365	0.6688	-0.419	-0.4734	-0.6966	0.06675	0.081398	0.412487	0.176273	0.249435	0.740009
K7EIE8	MBD3	-1.665	-2.334	-1.515	-1.692	-0.6193	-0.467	0.6686	0.1502	-0.02636	1.046	1.198	0.497041	0.845062	0.980708	0.1926	0.152809
Q9NXR7	BABAM2	-2.981	-3.649	-4.482	-4.121	-4.146	-3.695	0.6683	-1.501	-1.14	-1.166	-0.7147	0.503139	0.208592	0.250842	0.275286	0.194627
Q9BX68	HINT2	2.683	2.015	2.753	1.434	0.1288	2.941	0.6675	0.06992	-1.249	-2.554	0.2578	0.409103	0.926706	0.109051	0.007028	0.826782
H7BYY1	TPM1	0.4372	-0.229	-0.03433	-2.648	-0.6699	-0.05161	0.6662	-0.4715	-3.085	-1.107	-0.4888	0.096281	0.111771	0.039977	0.005912	0.254656
E9PLT0	CSDE1	2.568	1.902	2.121	2.139	1.968	2.092	0.666	-0.4464	-0.4285	-0.5996	-0.4759	0.242041	0.059148	0.141806	0.247922	0.236661
Q96GS4	BORCS6	-0.3516	-1.017	-0.3855	-1.926	-0.3414	-3.973	0.665	-0.03391	-1.574	0.01024	-3.621	0.719074	0.981672	0.393708	0.995249	0.025789
P29992	GNA11	1.388	0.7251	1.619	0.01387	0.3186	3.249	0.6633	0.2301	-1.375	-1.07	1.861	0.631897	0.854897	0.335788	0.363942	0.184734
A0A6Q8PG37	KIF2A	1.443	0.7796	1.498	0.254	0.02576	0.9561	0.6632	0.05486	-1.189	-1.417	-0.4867	0.291114	0.919424	0.071708	0.067086	0.577008
Q9H0U4	RAB1B	-4.06	-4.723	-4.778	-4.277	-5.116	-4.514	0.6632	-0.718	-0.2174	-1.057	-0.4539	0.721671	0.699005	0.902078	0.520339	0.813907
Q13868	EXOSC2	-0.9794	-1.641	-0.4048	-1.571	0.3121	-2.524	0.6612	0.5745	-0.5916	1.291	-1.544	0.476431	0.337098	0.308488	0.025347	0.022209
Q3ZCW2	LGALSL	-2.916	-3.576	-3.551	-3.048	-3.345	-2.595	0.6593	-0.635	-0.1319	-0.4292	0.3214	0.351997	0.455574	0.808517	0.561026	0.667712
A0A6I8PLB3	LARS1	-3.173	-3.83	-4.588	-6.88	-5.349	-5.929	0.6576	-1.415	-3.707	-2.176	-2.756	0.752277	0.438903	0.069499	0.292674	0.156297
Q16762	TST	0.4152	-0.2414	0.8486	-0.06906	0.5373	1.045	0.6566	0.4334	-0.4843	0.122	0.6293	0.142359	0.253984	0.17971	0.755921	0.104283
Q9H3G5	CPVL	1.733	1.077	2.054	2.29	1.692	1.82	0.6561	0.3204	0.5565	-0.04168	0.08688	0.243585	0.173955	0.042409	0.870246	0.735908
Q8WWY3	PRPF31	-0.2565	-0.9125	-0.3545	-1.087	-0.6914	-0.4442	0.6561	-0.09799	-0.8305	-0.435	-0.1878	0.545073	0.878698	0.488682	0.591456	0.815071
P67775	PPP2CA	2.537	1.881	2.885	3.125	2.587	2.194	0.6555	0.3483	0.5882	0.05001	-0.3432	0.237238	0.258946	0.044039	0.815658	0.378365
P61006	RAB8A	-5.877	-6.529	-6.728	-5.356	-5.823	-6.98	0.6521	-0.8517	0.5205	0.05353	-1.104	0.434852	0.131898	0.445898	0.945527	0.069524
O60547	GMDS	0.1435	-0.5084	-0.6666	-0.04605	-0.1584	-0.3576	0.6519	-0.8101	-0.1896	-0.3019	-0.5011	0.18627	0.078867	0.502588	0.484886	0.602041
Q96L14	CEP170P1	-1.963	-2.612	-4.695	-3.198	-3.937	-2.748	0.649	-2.732	-1.235	-1.974	-0.7847	0.697307	0.056611	0.436772	0.175431	0.318733
Q13158	FADD	-1.469	-2.116	-2.17	-3.666	-3.809	-1.808	0.6467	-0.7002	-2.196	-2.34	-0.339	0.309797	0.292541	0.095044	0.109822	0.692833
A0A2R8Y422	RPS27AP5	-7.081	-7.728	-6.78	-7.336	-6.94	-7.781	0.6467	0.3006	-0.255	0.1406	-0.7002	0.598372	0.760475	0.804342	0.885676	0.543678
E7EW00	U2SURP	1.28	0.6338	1.298	1.089	0.4976	1.154	0.6464	0.01773	-0.1913	-0.7826	-0.1266	0.07562	0.967477	0.696662	0.050378	0.772272
Q8NBJ5	COLGALT1	1.447	0.8011	1.442	0.6177	1.47	0.5981	0.6462	-0.005509	-0.8296	0.02264	-0.8492	0.070456	0.986226	0.032145	0.949897	0.03416
Q6P1N0	CC2D1A	0.5189	-0.1267	0.2108	-0.4229	-1.464	-0.9851	0.6455	-0.3081	-0.9417	-1.983	-1.504	0.419291	0.372535	0.134458	0.037184	0.037457
O95905	ECD	-0.5705	-1.215	-2.144	0.517	-0.8625	-0.4792	0.6447	-1.574	1.087	-0.292	0.0913	0.185911	0.033275	0.104922	0.694575	0.887589
A0A7I2V668	CTSB	-0.7201	-1.362	0.09128	-1.874	-1.041	-1.717	0.642	0.8114	-1.154	-0.3209	-0.9965	0.414462	0.010388	0.07394	0.724692	0.377677
Q9NPE3	NOP10	-0.465	-1.107	-1.279	-0.942	-1.924	-2.31	0.6419	-0.8142	-0.4769	-1.459	-1.845	0.3597	0.054996	0.332033	0.320122	0.106047
P61964	WDR5	-0.1715	-0.8132	-0.6764	-1.16	-1.419	-1.826	0.6417	-0.5049	-0.9881	-1.247	-1.655	0.256209	0.340986	0.075911	0.096656	0.267889
Q8IWB7	WDFY1	-2.779	-3.42	-4.468	-4.957	-3.41	-3.557	0.6409	-1.689	-2.178	-0.6314	-0.7782	0.72568	0.377781	0.258247	0.716036	0.648867
P19022	CDH2	-3.838	-4.477	-6.074	-2.398	-3.392	-4.398	0.6391	-2.236	1.44	0.4461	-0.56	0.707607	0.072605	0.181019	0.528597	0.675525
A0A2R8YDQ9	SUCLA2	2.714	2.076	2.581	1.243	1.591	3.431	0.6381	-0.1338	-1.471	-1.123	0.7164	0.356236	0.732047	0.009324	0.027527	0.176929
A0A7I2V4I5	ZC3H13	2.051	1.413	0.6562	-0.3769	1.339	1.151	0.6379	-1.394	-2.428	-0.7116	-0.9002	0.131089	0.059613	0.00235	0.238986	0.257961
I3L4Q1	LSM14A	-4.804	-5.44	-2.437	-2.585	-5.61	-5.192	0.6361	2.367	2.218	-0.8069	-0.3885	0.516454	0.119623	0.043077	0.502384	0.769481
Q6PGP7	TTC37	0.7405	0.1048	1.057	0.396	0.4272	-0.1178	0.6358	0.3168	-0.3445	-0.3133	-0.8583	0.30737	0.136609	0.293588	0.52449	0.267231
J3KP30	DNTTIP2	1.055	0.419	1.552	-0.7848	0.01665	0.4173	0.6357	0.497	-1.839	-1.038	-0.6374	0.462869	0.443765	0.04146	0.094015	0.268417
P49207	RPL34	3.032	2.397	2.703	2.443	3.027	2.987	0.635	-0.3293	-0.5891	-0.005594	-0.04561	0.144038	0.214458	0.323092	0.972609	0.832119
P26641	EEF1G	5.877	5.244	5.216	5.401	5.632	5.555	0.6331	-0.6612	-0.4755	-0.2445	-0.3216	0.048763	0.007616	0.019765	0.2108	0.070514
Q6UVJ0	SASS6	-1.987	-2.62	-2.725	-2.843	-1.728	-5.573	0.633	-0.7381	-0.8563	0.2596	-3.586	0.706908	0.663384	0.577532	0.860609	0.178592
A9Z1X7	SRRM1	-5.831	-6.463	-2.025	0.4674	0.214	-4.407	0.6328	0.2228	0.5264	0.273	1.423	0.498361	0.845214	0.43831	0.634631	0.437544
Q9NPH2	ISYNA1	1.866	1.234	3.114	2.887	2.671	2.728	0.632	1.248	1.021	0.8049	0.8621	0.511696	0.017049	0.034253	0.110137	0.075428
A0A087WYN9	DHX29	2.111	1.479	0.3643	0.4778	2.163	1.162	0.6319	-1.746	-1.633	0.05195	-0.9484	0.412394	0.162668	0.21383	0.96588	0.270815
A0A0A0MSA7	EIF4G3	0.8033	0.1727	-0.5047	0.3176	0.2594	0.178	0.6305	-1.308	-0.4856	-0.5439	-0.6253	0.570555	0.061099	0.169632	0.241421	0.10444
P11488	GNAT1	-6.543	-7.173	-6.063	-5.99	-5.571	-5.432	0.6299	0.4801	0.5528	0.9711	1.111	0.386887	0.513459	0.529308	0.352171	0.537908
Q16695	H3-4	6.504	5.874	4.692	4.895	5.838	6.25	0.6298	-1.811	-1.609	-0.666	-0.2537	0.604838	0.146859	0.360212	0.543641	0.758281
A0A7P0TB96	DYNC1H1	0.9661	0.3381	0.9022	0.788	0.9839	0.7625	0.628	-0.06381	-0.1781	0.01783	-0.2036	0.406446	0.8103	0.715939	0.947415	0.610136
Q9Y678	COPG1	1.737	1.109	2.187	1.189	1.888	1.334	0.6279	0.4499	-0.5483	0.1508	-0.4033	0.157427	0.37238	0.261105	0.729756	0.437396
A0A2R8YF45	HSD17B4	2.818	2.19	2.546	2.508	2.234	2.22	0.6276	-0.2718	-0.3098	-0.5841	-0.5985	0.125539	0.330576	0.221642	0.119893	0.050705
A9J4F5	ZNF593	0.4688	-0.1569	-0.0353	-4.015	-0.9192	-5.439	0.6257	-0.5041	-4.484	-1.388	-1.467	0.665676	0.576209	0.001205	0.154848	0.397941
P62913	RPL11	4.781	4.156	4.459	4.486	4.716	4.63	0.625	-0.3216	-0.2942	-0.06505	-0.1506	0.100558	0.310339	0.423165	0.666692	0.40011
A0A7P0TAE3	AKAP8L	-0.3754	-0.9997	-1.896	-0.4468	-0.4387	-2.246	0.6243	-1.52	-0.07141	-0.06331	-1.871	0.091704	0.000976	0.822793	0.86736	0.021296
D6RF62	PAICS	4.644	4.022	4.196	3.535	4.572	4.5	0.6226	-0.4481	0.4089	-0.07207	-0.1442	0.11268	0.007858	0.261735	0.574041	0.263716
A0A087WWS1	THOC1	0.8214	0.1988	1.017	-0.6531	0.282	-0.7334	0.6226	0.1953	-1.474	-0.5393	-1.555	0.447697	0.720639	0.02524	0.485211	0.083342
P21796	VDAC1	5.208	4.587	5.058	4.893	5.038	5.154	0.6211	-0.1509	-0.3156	-0.1701	-0.05433	0.045823	0.197169	0.007951	0.150677	0.739829
V9GYG2	AKR1A1	-0.28	-0.8991	-0.8103	-0.4486	-0.3322	-0.5868	0.6191	-0.5303	-0.1686	-0.05223	-0.3068	0.576974	0.519631	0.86211	0.952656	0.77061
E7EUI7	PPP1R2	-3.512	-4.13	-4.064	-4.418	-3.739	-2.785	0.6184	-0.5521	-0.9065	-0.2276	0.7269	0.663155	0.593732	0.484021	0.840333	0.483079
H3BPC4	UBE2I	2.4	1.782	1.047	2.39	2.016	2.332	0.6181	-1.354	-0.01024	-0.384	-0.06808	0.282655	0.000126	0.976221	0.212125	0.851941
A0A0D9SF63	TBL1XR1	-2.305	-2.923	-2.661	-3.534	-2.462	-1.645	0.6179	-0.3557	-1.229	-0.157	0.66	0.486975	0.72387	0.06727	0.713285	0.21391
A0A7P0Z491	ASPM	1.847	1.229	3.636	0.7255	0.9964	1.917	0.6174	1.789	-1.121	-0.8505	0.07056	0.113143	0.000921	0.01314	0.089906	0.859736
Q8IXN4	MAK	-6.528	-7.145	-4.188	-6.833	-6.376	-5.726	0.6172	2.34	-0.3046	0.152	0.8027	0.469994	0.076863	0.693427	0.871376	0.442912
Q5CZC0	FSIP2	3.279	2.662	3.849	3.239	2.623	3.625	0.617	0.5703	-0.04016	-0.656	0.3459	0.419666	0.209882	0.931799	0.137993	0.419135
Q15751	HERC1	0.8463	0.2296	2.396	0.2303	1.01	1.973	0.6168	1.55	-0.616	0.1637	1.127	0.275994	0.04116	0.317002	0.766587	0.087255
P62081	RPS7	3.279	2.663	2.364	2.015	2.447	3.165	0.6162	-0.9157	-1.264	-0.8325	-0.1144	0.087587	0.173424	0.084601	0.018986	0.675642
Q86WA6	BPHL	-0.9467	-1.563	-0.1957	-1.022	-1.472	-0.8319	0.6159	0.751	-0.07541	-0.5249	0.1147	0.71993	0.170963	0.834898	0.152572	0.826606
P61981	YWHAG	1.924	1.308	1.082	1.67	2.054	2.068	0.6154	-0.8415	-0.2533	0.1305	0.1445	0.384258	0.252702	0.558854	0.761744	0.455588
O95626	ANP32D	-6.361	-6.976	-6.799	-6.22	-6.791	-4.104	0.6153	-0.4377	0.1412	-0.43	2.257	0.357947	0.252895	0.770145	0.257888	0.00352
G3V3E8	NPC2	-2.345	-2.959	-2.257	-1.265	-2.931	-1.986	0.6144	0.08828	1.079	-0.5861	0.3584	0.447894	0.891172	0.035169	0.417894	0.487003
Q96AG4	LRRC59	2.959	2.345	3.412	3.671	3.471	3.048	0.6139	0.4529	0.7123	0.5117	0.08885	0.439869	0.178503	0.076624	0.051935	0.517679
P30050	RPL12	5.084	4.47	4.965	4.935	4.87	4.571	0.6138	-0.1192	-0.1486	-0.2138	-0.5131	0.08342	0.7056	0.565551	0.4294	0.06793
Q9GZL7	WDR12	0.3898	-0.224	0.05139	-0.1552	-0.9994	-0.6601	0.6138	-0.3385	-0.545	-1.389	-1.05	0.104055	0.519369	0.319181	0.034942	0.002304
P62316	SNRPD2	3.003	2.39	3.47	3.563	3.165	2.937	0.6132	0.4664	0.5599	0.1613	-0.06625	0.336387	0.177778	0.128954	0.712836	0.875733
Q7Z4Q2	HEATR3	-0.5885	-1.201	-1.194	-1.772	-1.734	-1.416	0.6127	-0.6058	-1.184	-1.145	-0.8273	0.273829	0.385459	0.186022	0.162914	0.286335
Q15276	RABEP1	-0.2818	-0.8945	-0.596	-1.048	-1.349	-0.8683	0.6126	-0.3141	-0.7666	-1.067	-0.5865	0.282651	0.339736	0.190452	0.127927	0.096711
A0A0A0MTN9	FDXR	1.027	0.4148	0.2052	0.6928	0.5602	1.274	0.6117	-0.8214	-0.3337	-0.4664	0.2472	0.025088	0.029187	0.337302	0.219051	0.550817
Q7L4I2	RSRC2	-3.794	-4.405	-5.88	-1.689	-4.759	-4.665	0.6114	-2.086	2.105	-0.965	-0.8708	0.581421	0.010472	0.051441	0.236918	0.133514
P49841	GSK3B	-2.619	-3.23	-1.476	-1.393	-2.722	-1.615	0.6113	1.143	1.226	-0.1034	1.003	0.714253	0.292685	0.264024	0.940822	0.384984
P13646	KRT13	-3.586	-4.197	-5.818	-5.253	-1.934	-2.318	0.6111	-2.233	-1.668	1.651	1.267	0.721686	0.094989	0.165449	0.090169	0.424003
P62906	RPL10A	4.878	4.269	4.658	4.842	5.124	4.72	0.6089	-0.2195	-0.03562	0.2468	-0.1578	0.417548	0.378854	0.82904	0.120442	0.249063
P78371	CCT2	6.233	5.624	5.93	6.053	6.067	6.147	0.6088	-0.3023	-0.1794	-0.1655	-0.08508	0.319187	0.206555	0.497759	0.247554	0.680575
Q32P41	TRMT5	-3.241	-3.85	-1.159	-3.177	-3.475	-2.149	0.6088	2.082	0.06405	-0.2341	1.093	0.196958	0.034432	0.942704	0.83422	0.114598
Q9HAV7	GRPEL1	1.473	0.8646	0.4523	-0.7472	0.3346	0.7112	0.6086	-1.021	-2.22	-1.139	-0.762	0.304711	0.031102	0.006784	0.178201	0.102274
P35244	RPA3	-4.128	-4.735	-4.603	-6.24	-4.427	-4.765	0.607	-0.4748	-2.112	-0.2982	-0.6367	0.727775	0.755456	0.182368	0.8592	0.680546
Q9NXX6	NSMCE4A	-1.863	-2.47	-1.033	-1.263	-2.497	-1.358	0.6065	0.8305	0.5996	-0.6344	0.5055	0.672048	0.303095	0.521574	0.568354	0.500986
Q9UJS0	SLC25A13	0.6036	-0.00287	0.9255	1.24	0.4047	1.323	0.6065	0.3219	0.6361	-0.1989	0.7196	0.336989	0.393397	0.265544	0.705791	0.10199
A0A7I2V685	EIF3I	3.872	3.267	3.257	3.351	3.429	3.433	0.6057	-0.6154	-0.5218	-0.4439	-0.44	0.197993	0.10745	0.252894	0.289209	0.296016
Q6ZNB6	NFXL1	-1.098	-1.703	-3.586	-3.428	-0.3127	-1.501	0.6057	-2.489	-2.33	0.7848	-0.403	0.667321	0.107125	0.0845	0.493156	0.709173
A0A0B4J2E5	LOC102724159	-0.838	-1.443	-1.458	-0.3503	-1.161	-0.2106	0.6055	-0.6201	0.4877	-0.3228	0.6274	0.099852	0.079638	0.308608	0.341011	0.401859
Q15269	PWP2	-0.838	-1.443	-1.458	-0.3503	-1.161	-0.2106	0.6055	-0.6201	0.4877	-0.3228	0.6274	0.099852	0.079638	0.308608	0.341011	0.401859
Q8N1B4	VPS52	-1.156	-1.761	-2.934	-0.3501	-0.1258	-0.1954	0.6053	-1.778	0.8056	1.03	0.9603	0.572807	0.047327	0.302581	0.136797	0.042501
F8VYL3	DNM1L	-0.5082	-1.113	2.541	2.005	1.674	0.351	0.6047	0.5493	0.01349	-0.3174	0.8592	0.711216	0.11657	0.969565	0.386116	0.294034
A6NDG6	PGP	0.4911	-0.1134	-0.08446	0.4897	-0.8846	0.06198	0.6045	-0.5755	-0.001366	-1.376	-0.4291	0.248961	0.099125	0.997194	0.127905	0.558051
Q96CX2	KCTD12	0.6813	0.07696	-0.6655	-0.53	-0.1594	0.2579	0.6043	-1.347	-1.211	-0.8407	-0.4234	0.384028	0.005095	0.000249	0.179918	0.076867
Q587I9	SFT2D3	-0.2088	-0.8129	-0.9651	-0.3607	-0.4511	-1.061	0.604	-0.7562	-0.1518	-0.2422	-0.8524	0.431614	0.076639	0.761749	0.601746	0.236118
O95340	PAPSS2	1.431	0.8277	0.6081	2.641	1.716	0.9176	0.6034	-0.823	1.21	0.2852	-0.5135	0.51751	0.382449	0.33537	0.795412	0.571904
Q6DKI1	RPL7L1	-0.9321	-1.535	-0.3305	-1.001	-0.375	-1.281	0.6033	0.6016	-0.06906	0.5571	-0.349	0.485804	0.105984	0.860767	0.062261	0.263016
H3BNX8	COX5A	2.302	1.701	2.981	3.172	2.919	2.739	0.6014	0.6791	0.8705	0.6171	0.437	0.729131	0.270045	0.178487	0.37434	0.534209
P07737	PFN1	6.184	5.583	5.509	5.545	5.514	5.803	0.601	-0.6745	-0.6388	-0.6693	-0.3802	0.300142	0.215212	0.201061	0.176266	0.368596
A0A1B0GVI3	KRT10	1.806	1.206	1.749	1.593	1.739	1.334	0.6002	-0.05706	-0.213	-0.06766	-0.4719	0.015697	0.678011	0.317323	0.785063	0.155506
P49790	NUP153	2.737	2.137	1.633	1.892	2.007	1.624	0.5999	-1.103	-0.8449	-0.73	-1.112	0.476665	0.063635	0.369099	0.429385	0.177566
B1AL79	PKN2	1.671	1.072	0.7123	1.384	0.9349	0.5401	0.5999	-0.9591	-0.2877	-0.7365	-1.131	0.443078	0.111127	0.637992	0.224346	0.100614
A0A0C4DGN6	GIT1	-0.7543	-1.354	-1.466	-0.8475	0.7209	-2.4	0.5997	-0.7115	-0.09325	1.475	-1.645	0.675875	0.475813	0.929371	0.206939	0.127022
Q8N7H5	PAF1	-2.646	-3.245	-2.062	-1.527	-4.031	-2.113	0.5987	0.5847	1.119	-1.384	0.5332	0.739002	0.631201	0.399895	0.387949	0.723992
Q5TB30	DEPDC1	3.992	3.393	3.604	4.346	5.192	3.815	0.5985	-0.3875	0.3539	1.2	-0.1769	0.655889	0.603556	0.276662	0.007973	0.800146
P22413	ENPP1	-1.044	-1.642	-1.412	-1.934	-2.032	-1.375	0.5984	-0.3686	-0.8901	-0.988	-0.3312	0.136208	0.266638	0.161449	0.370053	0.571414
P48723	HSPA13	-1.371	-1.969	-0.1551	-2.034	-2.761	-1.183	0.5982	1.216	-0.6631	-1.39	0.1878	0.475336	0.059899	0.527204	0.069745	0.784024
A0A3B3ITF0	DCPS	-1.147	-1.744	-1.339	-1.371	-1.554	-1.655	0.5968	-0.1916	-0.2238	-0.4064	-0.5076	0.099703	0.53678	0.523216	0.097977	0.001961
A0A6Q8PHK0	TRIP12	-2.744	-3.34	-5.382	-3.934	1.351	-2.826	0.5959	-2.639	-1.19	-0.7058	-0.0825	0.651085	0.027794	0.317228	0.059579	0.884292
H3BRK5	NUBP2	-0.2763	-0.8702	-0.2899	-0.4126	-0.4077	-0.406	0.5938	-0.0136	-0.1362	-0.1314	-0.1297	0.1666	0.974556	0.722243	0.726052	0.607293
Q92616	GCN1	5.306	4.714	4.26	4.655	4.496	3.86	0.5917	-1.045	-0.6509	-0.8101	-1.446	0.269407	0.056655	0.298379	0.199128	0.011285
P26373	RPL13	5.423	4.832	4.886	5.16	5.087	5.374	0.5911	-0.5372	-0.2636	-0.3361	-0.04873	0.286614	0.31295	0.605775	0.537233	0.930336
F8VPP1	AK2	1.257	0.6669	-0.2141	0.1897	0.8414	1.06	0.5903	-1.471	-1.067	-0.4157	-0.1968	0.176776	0.093025	0.242579	0.118628	0.424459
P48556	PSMD8	-0.2125	-0.7999	0.2288	0.3536	0.1843	0.04623	0.5874	0.4414	0.5661	0.3968	0.2587	0.755445	0.299612	0.171943	0.416753	0.479115
A0A804HIS0	GMPPA	-2.388	-2.974	-1.969	-4.104	-1.96	-1.961	0.5867	0.4182	-1.716	0.4278	0.4262	0.773382	0.328366	0.206773	0.423654	0.767798
Q9BX10	GTPBP2	1.633	1.048	-0.5523	-3.252	-1.374	0.7998	0.5858	-2.186	-4.886	-3.007	-0.8337	0.668246	0.15807	0.083427	0.157447	0.649208
P63000	RAC1	2.774	2.189	2.213	2.552	2.637	2.499	0.5855	-0.5609	-0.2225	-0.1373	-0.2756	0.171097	0.383805	0.646651	0.598707	0.131368
O43815	STRN	-0.05986	-0.6438	-0.7912	-1.83	-0.791	-1.234	0.5839	-0.7314	-1.77	-0.7311	-1.174	0.356943	0.290338	0.005739	0.088097	0.029205
Q9BUH6	PAXX	-1.182	-1.765	-0.5961	-2.74	-0.9135	-0.6888	0.5824	0.5864	-1.558	0.2689	0.4937	0.472004	0.33708	0.224172	0.527993	0.299515
H3BP28	COQ7	-5.758	-6.34	-6.803	-5.931	-5.71	-6.869	0.5822	-1.046	-0.1737	0.0475	-1.111	0.596761	0.04155	0.75912	0.956261	0.033611
I3L2L5	MCRIP1	0.6112	0.03013	0.4971	0.374	0.2345	0.4162	0.581	-0.1141	-0.2371	-0.3766	-0.195	0.142553	0.494105	0.225524	0.281897	0.492429
E7EM64	COPS6	2.552	1.972	1.708	2.201	1.892	1.737	0.5808	-0.8444	-0.351	-0.6606	-0.8151	0.46084	0.190226	0.665939	0.31832	0.217869
O43896	KIF1C	0.1949	-0.3855	-0.7712	0.7454	-1.135	1.764	0.5804	-0.9661	0.5505	-1.33	1.569	0.298996	0.020536	0.536423	0.253637	0.114841
Q7Z422	SZRD1	0.6552	0.07549	0.8797	0.2132	0.5531	0.302	0.5797	0.2245	-0.442	-0.1021	-0.3532	0.285794	0.697303	0.268763	0.76583	0.319707
Q6UXN9	WDR82	-1.11	-1.689	-1.049	-0.5197	-1.862	-1.338	0.5793	0.06067	0.5904	-0.7516	-0.2278	0.368999	0.917009	0.294129	0.274109	0.717601
J3KRK5	SHMT1	-0.9352	-1.514	-1.936	-1.818	-2.247	-1.101	0.5791	-1.001	-0.8828	-1.312	-0.1661	0.406468	0.241687	0.181714	0.234617	0.658621
F8VUB4	CNOT2	-0.9833	-1.562	-0.7438	-0.779	-1.468	-1.893	0.5787	0.2395	0.2043	-0.4846	-0.9094	0.328892	0.488755	0.595805	0.240999	0.040483
Q9Y3T9	NOC2L	0.05649	-0.5222	-0.3164	-0.0786	-0.1019	-0.09197	0.5787	-0.3729	-0.1351	-0.1584	-0.1485	0.134153	0.164921	0.623075	0.499715	0.622469
Q96CP2	FLYWCH2	0.2587	-0.3199	-1.387	-0.09204	-0.7663	0.6392	0.5786	-1.646	-0.3507	-1.025	0.3805	0.419403	0.13506	0.46509	0.133218	0.355883
Q02809	PLOD1	0.6306	0.05397	-0.3511	-0.7301	-0.3349	-0.3953	0.5766	-0.9817	-1.361	-0.9655	-1.026	0.122957	0.035682	0.079199	0.23321	0.013378
P63173	RPL38	3.822	3.246	3.723	3.631	3.999	3.588	0.5759	-0.09932	-0.1907	0.1775	-0.2336	0.484512	0.625691	0.326781	0.402875	0.307927
A0A0C4DGV3	NADK2	-0.4664	-1.042	-2.117	-0.3902	-1.733	-2.561	0.5755	-1.651	0.07628	-1.266	-2.095	0.613286	0.400065	0.936819	0.313495	0.058456
J3KPD9	NME1-NME2	7.172	6.597	6.155	6.461	6.767	6.988	0.5753	-1.017	-0.7112	-0.4056	-0.1843	0.288978	0.04857	0.156197	0.277575	0.558488
P62714	PPP2CB	2.435	1.86	2.885	3.082	2.505	2.146	0.5747	0.4507	0.6477	0.07011	-0.2886	0.288	0.165416	0.030135	0.736753	0.444432
A0A0C4DGH0	CD276	-2.21	-2.784	-4.858	-3.011	-3.217	-3.184	0.5742	-2.648	-0.8008	-1.007	-0.9742	0.699486	0.020238	0.538063	0.390328	0.3194
Q5ZPR3	CD276	-2.21	-2.784	-4.89	-3.011	-3.191	-3.184	0.5742	-2.68	-0.8008	-0.9815	-0.9742	0.699486	0.021146	0.538063	0.392789	0.3194
Q6P1K2	PMF1	-6.245	-6.818	-3.662	-2.697	-2.877	-4.518	0.5725	2.583	3.548	3.368	1.727	0.619603	0.032569	0.008146	0.06617	0.196327
H3BV90	CIAPIN1	-2.384	-2.956	-2.88	-0.7057	-1.37	-1.117	0.5715	-0.4956	1.679	1.014	1.267	0.777331	0.707631	0.267666	0.611847	0.459523
F2Z322	LUC7L	-1.307	-1.878	-0.7258	-0.08342	-2.868	0.08858	0.5712	0.5811	1.223	-1.561	1.395	0.805683	0.746514	0.378995	0.376926	0.310327
A0A7I2V4G8	NPM1	-6.156	-6.726	-5.913	-6.839	-7.311	-6.181	0.5706	0.2425	-0.683	-1.155	-0.0253	0.584612	0.833997	0.403953	0.203107	0.979747
A0A5F9ZHJ1	ADK	0.697	0.1267	0.06545	0.5852	0.4939	0.6324	0.5703	-0.6316	-0.1118	-0.2031	-0.0646	0.253169	0.042161	0.736429	0.424829	0.775857
B1AP46	EXOC6	-3.754	-4.323	-6.516	-4.906	-4.229	-4.981	0.5697	-2.762	-1.153	-0.4758	-1.227	0.512622	0.022965	0.152417	0.606163	0.336597
O95670	ATP6V1G2	0.3594	-0.2084	1.327	0.8944	1.087	0.7824	0.5678	0.9672	0.535	0.7275	0.423	0.585673	0.009328	0.003631	0.028984	0.183136
F2Z307	ATP6V1G2-DDX39B	0.3594	-0.2084	1.327	0.8944	1.087	0.7824	0.5678	0.9672	0.535	0.7275	0.423	0.585673	0.009328	0.003631	0.028984	0.183136
P49916	LIG3	1.575	1.008	1.319	1.635	0.8573	0.5927	0.5672	-0.2559	0.06003	-0.718	-0.9826	0.252098	0.531829	0.845971	0.218327	0.017796
P50583	NUDT2	-3.702	-4.269	-4.376	-6.486	-3.364	-6.024	0.5672	-0.6749	-2.785	0.3373	-2.322	0.769437	0.627278	0.070952	0.853561	0.117704
F5GXD8	STIP1	2.911	2.344	2.392	2.147	3.171	2.585	0.567	-0.5186	-0.7638	0.2595	-0.3262	0.072516	0.194893	0.197509	0.097596	0.229479
O60610	DIAPH1	2.674	2.109	1.901	2.355	2.097	2.074	0.5658	-0.7736	-0.3189	-0.5778	-0.6003	0.149757	0.015236	0.257641	0.185804	0.089549
Q9Y2T4	PPP2R2C	-6.568	-7.134	-6.424	-4.264	-6.18	-6.642	0.5652	0.1445	2.304	0.388	-0.07366	0.412053	0.835039	0.057051	0.665128	0.904989
Q8WXX0	DNAH7	2.463	1.899	2.693	2.841	1.984	1.602	0.5638	0.2304	0.3782	-0.4792	-0.8613	0.434268	0.69426	0.644272	0.311667	0.231087
Q9NVT9	ARMC1	-1.954	-2.518	-0.7754	-0.8553	-0.8683	-0.7181	0.5637	1.179	1.099	1.086	1.236	0.732664	0.491247	0.513423	0.579707	0.489081
Q86Y56	DNAAF5	0.9355	0.374	0.5956	-0.1416	-1.387	-0.02646	0.5615	-0.34	2.195	0.9502	-0.962	0.392842	0.331267	0.037183	0.408799	0.040846
Q96FX7	TRMT61A	1.979	1.419	0.291	0.8974	2.713	1.456	0.56	-1.688	-1.081	0.7339	-0.5226	0.378157	0.022107	0.374104	0.037441	0.254732
A0A286YFF7	PPT1	1.373	0.8145	0.6362	1.881	1.275	0.6793	0.5586	-0.7369	0.5077	-0.0979	-0.6938	0.0234	0.028151	0.276002	0.462795	0.000636
Q99436	PSMB7	0.2569	-0.3006	-0.3214	-0.005241	-0.3191	-0.3439	0.5575	-0.5783	-0.2621	-0.576	-0.6007	0.102694	0.047964	0.376376	0.295448	0.426243
C9J8S3	RAB7A	1.302	0.7451	1.757	1.216	1.228	1.428	0.557	0.4551	-0.08573	-0.07428	0.1258	0.229702	0.02709	0.747392	0.723425	0.589025
Q9BVL2	NUP58	-2.874	-3.431	-3.236	-0.9594	-1.679	-3.029	0.5568	-0.362	1.914	1.194	-0.155	0.805398	0.790304	0.140495	0.051606	0.923497
Q8IXM2	BAP18	0.9328	0.376	0.7273	0.5395	0.7783	0.6397	0.5567	-0.2054	-0.3932	-0.1545	-0.293	0.396745	0.298674	0.371728	0.683066	0.350936
F8W038	C17orf49	0.9328	0.376	0.7273	0.5395	0.7783	0.6397	0.5567	-0.2054	-0.3932	-0.1545	-0.293	0.396745	0.298674	0.371728	0.683066	0.350936
P20338	RAB4A	-3.535	-4.091	-5.951	-4.533	-3.422	-5.049	0.5558	-2.416	-0.9977	0.1131	-1.514	0.594455	0.069556	0.416821	0.913777	0.180712
F8WDT8	DDX56	0.299	-0.2552	-0.02934	-0.3158	1.027	-0.2075	0.5542	-0.3284	-0.6149	0.7283	-0.5065	0.479666	0.457519	0.323736	0.150922	0.362634
P47985	UQCRFS1	1.253	0.7002	1.313	1.26	0.9526	0.7811	0.5523	0.06055	0.007661	-0.3	-0.4714	0.106415	0.898037	0.969719	0.212562	0.037659
Q9P265	DIP2B	0.7227	0.1708	-0.8946	-0.5388	-0.3159	-0.2075	0.552	-1.617	-1.262	-1.039	-0.9302	0.394426	0.22796	0.087805	0.149003	0.057234
E9PB93	POLR2D	-3.926	-4.477	-5.883	-5.34	-4.313	-3.039	0.5513	-1.957	-1.413	-0.3866	0.8874	0.771537	0.286885	0.388175	0.807023	0.564052
Q58FF8	HSP90AB2P	-4.717	-5.267	-4.452	-2.257	-4.769	-2.934	0.5502	0.265	2.461	-0.05155	1.783	0.755527	0.875097	0.27738	0.976984	0.311061
H3BMM8	JPT2	2.147	1.598	1.086	1.926	2.156	2.197	0.5497	-1.062	-0.2211	0.008433	0.04955	0.021366	0.001477	0.327849	0.945966	0.787021
A0A1W2PQ37	ME2	-6.064	-6.612	-4.847	-6.875	-6.472	-5.73	0.5482	1.217	-0.8105	-0.4078	0.3344	0.544343	0.341596	0.174089	0.626978	0.809122
P53384	NUBP1	1.444	0.8974	0.1741	1.173	0.9436	1.231	0.5464	-1.27	-0.271	-0.5002	-0.2125	0.295685	0.003012	0.369347	0.552702	0.359335
O60220	TIMM8A	0.9828	0.4364	0.8994	0.03338	1.25	1.508	0.5464	-0.08338	-0.9494	0.2669	0.5251	0.421776	0.917563	0.265341	0.729638	0.368838
P10398	ARAF	-1.774	-2.32	-0.7551	-1.49	-1.325	-2.318	0.5458	1.019	0.2848	0.4491	-0.5439	0.097631	0.012089	0.675693	0.508771	0.575345
K7ERZ6	LGALS3BP	-0.176	-0.7211	-0.1501	0.5162	0.7108	0.2635	0.5451	0.02588	0.6922	0.8868	0.4395	0.472711	0.960795	0.185609	0.075013	0.308361
Q15417	CNN3	4.37	3.825	3.174	2.913	3.912	4.671	0.5449	-1.196	-1.457	-0.4584	0.3013	0.399304	0.104856	0.032217	0.494066	0.674062
J3KMY5	NPC2	-2.345	-2.888	-2.291	-1.28	-1.798	-2.275	0.5431	0.05374	1.065	0.547	0.07016	0.516582	0.93581	0.03695	0.540161	0.903546
A0A0C4DGV4	LAMTOR5	0.2598	-0.2832	0.9372	0.7808	0.7803	0.4079	0.543	0.6774	0.521	0.5205	0.1481	0.497745	0.052833	0.15781	0.122452	0.599635
E9PS17	SCYL1	0.05301	-0.4891	-1.586	0.4537	-0.6031	-0.2076	0.5421	-1.639	0.4007	-0.6561	-0.2606	0.459014	0.044248	0.129209	0.104747	0.424058
P22670	RFX1	-2.84	-3.382	-2.491	-3.659	-2.271	-1.584	0.542	0.3496	-0.8184	0.5694	1.256	0.691057	0.749226	0.557071	0.607128	0.307286
O43837	IDH3B	1.563	1.022	2.145	2.007	2.156	2.42	0.541	0.5816	0.4437	0.5927	0.8568	0.597855	0.119113	0.124199	0.159386	0.019133
A0A3B3IUA7	TRIM25	0.7981	0.2577	0.1968	0.5321	0.6547	0.837	0.5403	-0.6012	-0.266	-0.1433	0.03891	0.051317	0.257966	0.390798	0.727939	0.877728
A6NEM2	HCFC1	3.764	3.225	2.912	3	3.096	3.068	0.5397	-0.8526	-0.7638	-0.6683	-0.696	0.089529	0.016385	0.023142	0.069466	0.033257
A0A087WV48	A0A087WV48	1.488	0.9497	0.3426	1.214	1.448	1.757	0.5386	-1.146	-0.2748	-0.04033	0.2684	0.352582	0.117301	0.65576	0.902364	0.330267
P18859	ATP5PF	2.663	2.125	2.599	2.756	2.863	2.17	0.5385	-0.06471	0.0923	0.1999	-0.493	0.147874	0.851158	0.735949	0.62617	0.144791
Q6NUK1	SLC25A24	1.262	0.7238	0.6764	1.115	1.114	0.5599	0.5385	-0.5859	-0.1473	-0.1479	-0.7024	0.240559	0.156102	0.704684	0.728632	0.109622
P31947	SFN	-2.243	-2.78	-2.742	-3.775	-3.125	-0.8477	0.5378	-0.4997	-1.532	-0.8826	1.395	0.595588	0.129781	0.148495	0.506948	0.014545
A0A1B0GUS7	UNC13B	2.487	1.949	0.7258	0.6446	1.491	2.414	0.5378	-1.761	-1.842	-0.9963	-0.07295	0.193634	0.024355	<0.000001	0.00817	0.891067
O14974	PPP1R12A	0.4949	-0.04247	0.3517	0.8487	0.396	0.7727	0.5374	-0.1433	0.3538	-0.09898	0.2778	0.637456	0.704419	0.200621	0.633753	0.379157
Q9NRF9	POLE3	1.096	0.5591	1.05	1.384	0.6207	1.192	0.5372	-0.04646	0.288	-0.4756	0.09572	0.526041	0.883108	0.331842	0.357737	0.743962
A0A0G2JIW1	HSPA1B	9.268	8.733	10.36	8.343	8.932	9.005	0.5343	1.093	-0.925	-0.3356	-0.2628	0.173043	0.00073	0.001665	0.099187	0.204812
O94905	ERLIN2	-0.1479	-0.6808	0.5154	0.3892	0.03098	-0.5283	0.5328	0.6633	0.5371	0.1789	-0.3804	0.539424	0.167297	0.076797	0.488303	0.175762
Q9Y248	GINS2	-2.423	-2.955	-1.724	-1.619	-1.873	-1.679	0.5325	0.6992	0.8034	0.5493	0.7434	0.723132	0.008453	0.032164	0.16417	0.068512
P16402	H1-3	5.601	5.07	3.906	5.013	5.251	5.376	0.5313	-1.695	-0.5885	-0.35	-0.2251	0.563463	0.074248	0.463282	0.672703	0.760041
F8WAW4	ECI2	-0.9952	-1.526	-0.5841	-1.151	-1.89	-0.7272	0.5308	0.4111	-0.156	-0.895	0.268	0.47994	0.446411	0.791157	0.216498	0.644219
Q01970	PLCB3	-3.228	-3.757	-0.7665	-4.395	-2.912	-3.358	0.5285	2.462	-1.167	0.3161	-0.13	0.651596	0.30224	0.482328	0.839935	0.901773
G3V3A4	SNW1	2.673	2.148	2.063	2.103	2.617	1.933	0.5246	-0.6098	-0.5699	-0.05529	-0.7399	0.137072	0.008502	0.005526	0.766022	0.046406
J3KNC0	GTF2A1	-3.468	-3.992	-4.584	-5.281	-3.735	-3.105	0.5239	-1.116	-1.813	-0.267	0.3635	0.583284	0.021366	0.051268	0.715326	0.313358
O75475	PSIP1	2.3	1.776	2.094	1.872	1.908	1.889	0.5235	-0.2055	-0.4275	-0.3923	-0.4104	0.242517	0.584125	0.299106	0.31679	0.322996
O15213	WDR46	0.9942	0.472	-0.2685	1.046	-0.32	1.138	0.5223	-1.263	0.05147	-1.314	0.1434	0.596976	0.131729	0.965336	0.191245	0.836774
C9JRJ5	LIMD1	-1.059	-1.58	-1.618	-0.7509	-2.09	-2.019	0.5213	-0.5584	0.3081	-1.031	-0.9601	0.487065	0.429221	0.730334	0.327418	0.381518
P50148	GNAQ	-3.38	-3.901	-1.111	-4.722	-3.332	-1.803	0.521	2.269	-1.342	0.04765	1.576	0.635311	0.057277	0.339778	0.970955	0.153123
H0YD13	CD44	-1.851	-2.372	-3.119	-3.421	-2.646	-1.463	0.5208	-1.268	-1.57	-0.7945	0.3877	0.55932	0.0743	0.159372	0.281675	0.465056
Q9Y3A4	RRP7A	-2.032	-2.551	-1.135	-3.304	-1.256	-2.542	0.5195	0.896	-1.273	0.7752	-0.5105	0.716843	0.325318	0.368671	0.45564	0.724164
Q92733	PRCC	-0.4666	-0.985	-0.05817	-0.7067	-0.1975	-0.9077	0.5185	0.4084	-0.2401	0.2691	-0.4411	0.354241	0.332195	0.374076	0.349673	0.195166
P36776	LONP1	2.662	2.144	2.79	1.256	3.45	2.209	0.5184	0.1271	-1.407	0.7874	-0.453	0.456118	0.819024	0.00191	0.057522	0.356506
A0A7P0Z497	PPIB	4.268	3.75	4.115	4.146	4.041	3.987	0.5181	-0.1531	-0.122	-0.2265	-0.2807	0.029772	0.233723	0.473942	0.199428	0.063926
A6NF51	BPNT1	1.178	0.6603	0.3346	1.219	1.115	0.6705	0.5179	-0.8436	0.3126	0.2082	-0.2363	0.250911	0.085045	0.369034	0.503507	0.421952
F8WCR1	RPL3	3.455	2.937	3.029	3.102	3.11	3.43	0.5177	-0.4256	-0.3521	-0.3447	-0.02411	0.220257	0.322164	0.420993	0.488806	0.952411
O60508	CDC40	-0.399	-0.9155	-0.7722	-1.249	-2.23	-0.99	0.5165	-0.3732	-0.8495	-1.831	-0.591	0.361576	0.498963	0.403315	0.21117	0.398957
Q9UMZ2	SYNRG	0.9918	0.4762	-0.05766	-0.05902	-0.09336	0.8512	0.5156	-1.049	-1.051	-1.085	-0.1406	0.49593	0.086478	0.175055	0.244407	0.674271
A0A096LNH5	GATD3B	3.459	2.945	2.921	3.411	3.368	2.968	0.5138	-0.5378	-0.04791	-0.09062	-0.4908	0.271374	0.035111	0.77859	0.743265	0.16353
Q9H1B7	IRF2BPL	-2.794	-3.308	-3.558	-2.625	-2.858	-2.766	0.5136	-0.7643	0.1692	-0.06381	0.02813	0.659059	0.636611	0.905732	0.953939	0.976086
Q9BRR6	ADPGK	-1.328	-1.841	-0.9209	-2.42	-1.456	-0.5618	0.5128	0.4072	-1.092	-0.1274	0.7663	0.356394	0.513496	0.021561	0.86737	0.151315
O15294	OGT	1.092	0.5817	0.03758	0.5364	0.7091	-0.4264	0.51	-1.054	-0.5553	-0.3826	-1.518	0.039789	0.006718	0.126277	0.180336	0.021368
Q13111	CHAF1A	1.083	0.5733	-0.3042	2.393	-0.7242	0.4188	0.5093	-1.387	1.311	-1.807	-0.6638	0.60535	0.011569	0.16242	0.010465	0.133408
G3XAL0	MDH2	5.848	5.34	5.147	5.285	5.722	5.496	0.5084	-0.7012	-0.5635	-0.1263	-0.3519	0.083121	0.060345	0.058647	0.310555	0.010549
Q8NDA2	HMCN2	1.969	1.462	1.592	1.373	1.591	2.491	0.5072	-0.3774	-0.5959	-0.378	0.5219	0.466236	0.556752	0.326274	0.716408	0.248346
Q13564	NAE1	0.5089	0.002057	0.3597	0.3305	0.592	-0.0334	0.5068	-0.1492	-0.1784	0.08317	-0.5423	0.329362	0.670668	0.568082	0.766049	0.133221
Q9NX47	MARCHF5	-3.585	-4.091	-2.552	-6.526	-4.217	-2.347	0.5062	1.033	-2.941	-0.6317	1.238	0.68359	0.329799	0.036023	0.601553	0.249264
P0DJD0	RGPD1	1.169	0.6628	0.9012	-1.041	-0.2911	1.072	0.5062	-0.2678	-2.21	-1.46	-0.09703	0.380527	0.400654	0.130535	0.086792	0.777568
P0DJD1	RGPD2	1.169	0.6628	0.9012	-1.041	-0.2911	1.072	0.5062	-0.2678	-2.21	-1.46	-0.09703	0.380527	0.400654	0.130535	0.086792	0.777568
P22307	SCP2	3.15	2.646	2.813	2.581	3.383	2.718	0.5037	-0.3365	-0.5688	0.2331	-0.4311	0.035607	0.362329	0.070865	0.640884	0.069436
Q9Y2B0	CNPY2	-0.003073	-0.5063	-0.07377	0.2278	0.6077	-0.3317	0.5032	-0.0707	0.2309	0.6108	-0.3286	0.478858	0.79471	0.433168	0.080582	0.623011
A0A2R8Y6G7	NUCB2	-3.325	-3.828	-3.743	-2.174	-3.99	-3.529	0.5031	-0.4182	1.151	-0.6656	-0.2046	0.762662	0.777162	0.292777	0.605654	0.856677
Q16630	CPSF6	2.025	1.522	2.614	2.812	2.181	2.184	0.5027	0.5892	0.7871	0.1562	0.1598	0.567177	0.116874	0.004367	0.578988	0.636042
P28838	LAP3	2.867	2.364	3.031	1.865	2.111	1	0.5023	0.1639	-1.002	-0.756	-1.866	0.552575	0.529707	0.022702	0.217399	0.000198
P04075	ALDOA	7.693	7.191	6.942	7.193	7.517	7.675	0.5017	-0.7505	-0.4997	-0.1762	-0.01768	0.028129	0.000651	0.004239	0.493878	0.910937
Q6ZSX4	EPB41L2	1.51	1.01	1.016	1.223	1.289	0.7767	0.4998	-0.4936	-0.2868	-0.221	-0.7332	0.197951	0.203458	0.481883	0.542068	0.080328
O14647	CHD2	1.521	1.022	2.721	1.495	2.272	2.09	0.499	1.2	-0.0257	0.7512	0.5694	0.652015	0.197874	0.973779	0.644808	0.539357
P84090	ERH	4.133	3.635	3.477	4.134	3.795	4.397	0.4979	-0.6566	0.0006842	-0.3384	0.2635	0.430713	0.300609	0.99908	0.612778	0.635831
Q92688	ANP32B	-0.08526	-0.5829	0.907	-1.212	-0.6458	-0.2195	0.4976	0.9923	-1.127	-0.5605	-0.1342	0.467769	0.054721	0.095762	0.558904	0.78649
Q9Y2R4	DDX52	-0.4245	-0.92	0.01031	-0.05409	0.5066	0.3773	0.4954	0.4348	0.3704	0.9311	0.8019	0.744206	0.425079	0.578749	0.280736	0.164638
E9PIQ7	HAX1	-1.43	-1.925	-2.668	-2.374	-2.827	-3.296	0.4951	-1.238	-0.9443	-1.397	-1.866	0.606931	0.340954	0.174385	0.253944	0.158975
Q15819	UBE2V2	0.3004	-0.1939	-0.1738	-1.951	-0.7107	-0.5711	0.4943	-0.4743	-2.252	-1.011	-0.8715	0.49552	0.495615	0.124714	0.235256	0.395357
B9A058	HIBCH	-0.6184	-1.112	-2.104	-0.9319	-2.321	-2.712	0.4936	0.06346	-0.3135	-0.154	-0.5441	0.476505	0.920025	0.814583	0.907168	0.649732
Q7L576	CYFIP1	2.526	2.033	1.558	1.521	1.753	2.633	0.4927	-0.9676	-1.004	-0.7729	0.1074	0.297849	0.051018	0.060439	0.092549	0.836282
K7ENB4	GPX4	0.101	-0.3911	3.37	0.3343	-0.8352	-0.2578	0.4922	3.269	0.2333	-0.9362	-0.3589	0.718806	0.03223	0.873222	0.513872	0.713825
Q9BRX5	GINS3	-1.215	-1.707	-1.38	-2.085	-0.4112	-1.103	0.4918	-0.1647	-0.8699	0.8038	0.1124	0.399054	0.670607	0.406506	0.139335	0.850097
O43681	GET3	1.259	0.7678	2.183	2.074	2.13	0.9709	0.4916	0.9238	0.8144	0.8703	-0.2885	0.425757	0.018456	0.001536	0.003059	0.087779
R4GNH3	PSMC3	2.583	2.092	2.909	3.217	2.994	3.069	0.4909	0.3266	0.6344	0.4116	0.4859	0.484788	0.235606	0.027825	0.189733	0.117445
O75380	NDUFS6	-2.762	-3.252	-3.024	-2.037	-2.495	-1.561	0.4901	-0.2622	0.7243	0.267	1.201	0.682378	0.822708	0.347753	0.748939	0.097041
Q9Y2S7	POLDIP2	0.2339	-0.256	-1.113	0.2045	0.2384	-0.5648	0.4899	-1.347	-0.02943	0.004477	-0.7987	0.542212	0.261184	0.965248	0.994529	0.379445
Q9BZV1	UBXN6	-2.067	-2.557	-2.259	-3.593	-2.088	-1.697	0.4899	-0.1911	-1.525	-0.02099	0.3703	0.770996	0.904522	0.316547	0.987118	0.800299
Q9UKS6	PACSIN3	-2.55	-3.038	-3.731	-4.751	-4.499	-2.7	0.4887	-1.181	-2.201	-1.949	-0.1509	0.687877	0.239438	0.021361	0.020677	0.658417
A0A0C4DGQ6	RPRD1A	1.022	0.5328	0.1737	0.4855	0.4165	-0.003724	0.4887	-0.8478	-0.536	-0.605	-1.025	0.137636	0.025309	0.104561	0.076198	0.017301
O60925	PFDN1	2.523	2.036	1.837	2.08	2.471	2.438	0.4872	-0.6857	-0.443	-0.05225	-0.08526	0.387256	0.012278	0.175301	0.707762	0.7237
Q9Y605	MRFAP1	-0.8267	-1.313	-0.8726	-0.8312	-0.6902	-0.835	0.4865	-0.04594	-0.004496	0.1365	-0.008312	0.444389	0.854349	0.982547	0.609059	0.975851
Q96BP2	CHCHD1	-0.3274	-0.8133	-0.5698	-2.256	-0.7772	-0.4791	0.4859	-0.2424	-1.929	-0.4498	-0.1517	0.112647	0.449162	0.237588	0.513545	0.650198
I3L167	CORO7-PAM16	0.9122	0.4282	-0.6182	-0.9295	0.551	0.00303	0.4841	-1.53	-1.842	-0.3613	-0.9092	0.023052	0.000343	0.00268	0.470318	0.037008
Q8TEM1	NUP210	1.456	0.974	0.9049	1.703	0.9385	0.9894	0.482	-0.5511	0.2469	-0.5175	-0.4666	0.363261	0.275132	0.730951	0.3537	0.38882
Q7Z2T5	TRMT1L	-0.2157	-0.6976	-1.946	-0.5139	-0.8285	-1.325	0.4819	-1.73	-0.2982	-0.6128	-1.109	0.315305	0.020233	0.489897	0.235419	0.098549
Q13257	MAD2L1	-1.385	-1.866	-3.533	-1.466	-2.78	-1.62	0.4811	-2.148	-0.08127	-1.395	-0.2354	0.603577	0.037356	0.913691	0.316107	0.744143
A0A7I2V2C6	RSL24D1	-3.724	-4.205	-4.72	-4.34	-3.923	-2.85	0.4809	-0.9962	-0.6156	-0.1986	0.8743	0.756097	0.45267	0.619213	0.868596	0.3518
Q9H7C9	AAMDC	-2.007	-2.488	-3.096	-0.7723	-4.173	-3.086	0.4808	-1.089	1.234	-2.167	-1.079	0.726963	0.343355	0.19753	0.116131	0.327573
Q9H8S9	MOB1A	-2.729	-3.21	-4.919	-3.693	-1.928	-2.735	0.4807	-2.19	-0.964	0.8011	-0.005991	0.411186	0.030691	0.388874	0.235681	0.996568
Q9H5N1	RABEP2	0.3923	-0.08842	0.2684	-1.153	-0.2645	-0.9802	0.4807	-0.1239	-1.545	-0.6568	-1.373	0.571088	0.853973	0.014893	0.408476	0.112732
Q96T58	SPEN	2.836	2.356	2.848	1.381	2.761	2.413	0.4801	0.01207	-1.454	-0.07457	-0.4229	0.629772	0.994199	0.142214	0.962555	0.673482
P46087	NOP2	2.624	2.145	1.839	2.266	2.033	2.406	0.4794	-0.7851	-0.3582	-0.5914	-0.2184	0.403673	0.196172	0.498995	0.319527	0.729951
Q9Y320	TMX2	-2.519	-2.998	-6.306	-4.126	-3.563	-2.624	0.4789	-3.787	-1.607	-1.044	-0.1046	0.824549	0.101627	0.369566	0.542777	0.946441
P09972	ALDOC	3.542	3.063	3.832	3.923	4.055	3.616	0.4784	0.2897	0.3811	0.5135	0.07397	0.60395	0.530003	0.430523	0.118237	0.824784
I3L3P7	RPS15A	4.064	3.586	4.089	4.186	3.979	4.172	0.478	0.02498	0.1226	-0.08428	0.1088	0.341174	0.897812	0.653067	0.826026	0.484117
Q9Y3E5	PTRH2	-1.063	-1.541	-1.185	-0.226	-0.5226	-0.3716	0.4779	-0.122	0.8372	0.5406	0.6916	0.397525	0.820439	0.396452	0.545106	0.451426
F8WDB3	ARF4	-2.885	-3.36	-0.7397	-2.147	-0.4796	-1.379	0.4756	2.145	0.7374	2.405	1.505	0.786968	0.105586	0.518626	0.141613	0.214527
P61599	NAA20	-1.368	-1.843	-0.1545	-0.4252	-1.209	-1.285	0.4755	1.213	0.9424	0.1584	0.08301	0.623142	0.044555	0.167744	0.690545	0.835782
P08240	SRPRA	0.5423	0.0669	1.231	0.6958	0.2366	0.1166	0.4754	0.6888	0.1535	-0.3057	-0.4257	0.574988	0.391042	0.857948	0.679741	0.531765
A0A286YFJ4	MAPK10	-5.011	-5.485	-3.956	-5.916	-3.909	-4.926	0.474	1.055	-0.9048	1.102	0.08536	0.759694	0.534888	0.469345	0.507617	0.960614
P42285	MTREX	2.116	1.643	1.93	1.841	1.807	1.654	0.4735	-0.1864	-0.2755	-0.3088	-0.4619	0.201455	0.320845	0.282199	0.060118	0.197602
Q4R9M9	KIF1B	-1.159	-1.631	0.0007686	-0.5305	-2.582	-0.7904	0.4723	1.16	0.6285	-1.423	0.3686	0.794228	0.463478	0.670475	0.488081	0.822283
Q9Y512	SAMM50	2.269	1.797	0.4766	-1.521	-0.2701	-0.6015	0.472	-1.793	-3.79	-2.539	-2.871	0.645855	0.040243	0.001496	0.039505	0.006196
B7Z6P3	KTN1	-3.44	-3.912	-3.345	-6.874	-2.897	-3.364	0.4717	0.09495	-3.434	0.5428	0.07624	0.772272	0.930096	0.023083	0.730939	0.958289
Q9UJA5	TRMT6	-0.9388	-1.41	-4.806	-3.367	-1.631	-4.193	0.4708	-3.867	-2.428	-0.6919	-3.255	0.647141	0.007897	0.135967	0.604591	0.078898
F8WB66	SF3A1	0.191	-0.2793	0.4022	-0.7271	-0.6116	0.9307	0.4704	0.2112	-0.9181	-0.8026	0.7397	0.401891	0.401596	0.189798	0.468455	0.042095
P62487	POLR2G	-1.559	-2.028	-1.362	-2.206	-1.51	-1.284	0.4686	0.1966	-0.6475	0.04924	0.2748	0.625144	0.757787	0.38202	0.935939	0.636791
Q9C0E8	LNPK	0.4016	-0.06565	2.242	-0.7019	-0.1477	-0.01492	0.4673	1.84	-1.104	-0.5493	-0.4165	0.596413	0.149813	0.254552	0.542477	0.62185
E5RJR5	SKP1	1.108	0.6411	-0.3293	1.054	1.75	1.752	0.4671	-1.437	-0.05431	0.642	0.6437	0.691089	0.06523	0.956199	0.272745	0.527947
O95861	BPNT1	0.9068	0.4397	0.2289	1.326	1.215	1.131	0.467	-0.6779	0.1478	0.03643	-0.04676	0.400029	0.161022	0.625609	0.881581	0.844808
A0A1W2PQ74	HNRNPU	-7.276	-7.743	-7.23	-6.82	-6.794	-5.876	0.467	0.04588	0.4564	0.4826	1.4	0.504852	0.932858	0.355835	0.342408	0.268013
A0A7I2V3E4	EIF4H	1.618	1.151	2.393	2.103	1.804	1.842	0.4666	0.7754	0.4859	0.1863	0.224	0.783234	0.37177	0.666191	0.869146	0.836799
Q9H2U1	DHX36	2.279	1.814	2.729	2.924	2.938	1.933	0.4648	0.4498	0.6449	0.659	-0.3457	0.697916	0.451854	0.267051	0.202064	0.450728
H0Y4T6	PIN4	2.016	1.551	0.9548	1.545	-1.99	-2.737	0.4645	-1.061	-0.4709	1.469	0.7209	0.053394	0.010529	0.32019	0.23236	0.64503
A0A087WWW9	BCL10	0.9172	0.4531	-0.1326	0.4319	0.2269	-0.1313	0.4641	-1.05	-0.4853	-0.6903	-1.049	0.458513	0.126348	0.404318	0.342701	0.119565
P43897	TSFM	1.267	0.803	1.394	1.655	0.3133	1.372	0.4641	0.127	0.3884	-0.9537	0.105	0.398106	0.623548	0.111673	0.198989	0.635536
P32119	PRDX2	5.776	5.312	5.69	5.468	5.563	5.657	0.4638	-0.08536	-0.3074	-0.2123	-0.1189	0.097897	0.715132	0.089889	0.265215	0.365459
P48729	CSNK1A1	-1.202	-1.664	-2.975	-1.548	-0.8967	-1.846	0.4627	-1.773	-0.3463	0.3051	-0.6441	0.521194	0.0138	0.502733	0.412789	0.1191
O95219	SNX4	0.5591	0.09857	-0.859	-0.9243	0.5568	0.119	0.4605	-1.418	-1.483	-0.002302	-0.4401	0.264312	0.001746	0.310428	0.994219	0.123931
Q8NFH4	NUP37	-2.793	-3.253	-2.856	-4.779	-3.28	-2.23	0.4598	-0.06242	-1.986	-0.4868	0.5634	0.620076	0.958677	0.094091	0.520383	0.455483
P39019	RPS19	5.463	5.004	4.546	4.906	5.266	5.304	0.4592	-0.9174	-0.5571	-0.1974	-0.1592	0.210813	0.026184	0.035488	0.537114	0.43038
B4DMU5	GNL3	3.045	2.587	2.249	-2.606	2.208	2.069	0.4584	-0.7961	-1.115	-0.8378	-0.9764	0.36962	0.123218	0.167146	0.016875	0.096067
E7EQR4	EZR	5.013	4.556	4.823	4.801	4.908	4.626	0.4577	-0.1899	-0.2124	-0.105	-0.3878	0.240184	0.410659	0.207219	0.612705	0.057582
P08047	SP1	-1.281	-1.738	-1.072	-1.513	-0.5926	-1.367	0.4568	0.2097	-0.2319	0.6887	-0.08577	0.163995	0.232462	0.440143	0.152819	0.819272
Q8N5N7	MRPL50	-2.034	-2.49	-0.2568	-1.347	-1.34	-1.416	0.4567	1.777	0.6864	0.6941	0.6173	0.453579	0.00642	0.42987	0.250967	0.363135
Q9Y3B3	TMED7	-1.783	-2.238	-1.394	-1.364	-0.9753	-2.368	0.4545	0.3887	0.4193	0.8078	-0.5846	0.742973	0.659163	0.705786	0.523357	0.706424
P36551	CPOX	0.5283	0.07429	0.1446	0.5948	0.2035	0.3108	0.454	-0.3837	0.06656	-0.3248	-0.2174	0.021586	0.038585	0.73986	0.472021	0.162673
F8WEB6	YWHAH	1.221	0.7676	0.7912	0.2355	0.946	1.049	0.4537	-0.4301	-0.9858	-0.2753	-0.1727	0.081459	0.158968	0.224303	0.53277	0.635786
A0A3B3IU31	A0A3B3IU31	-2.738	-3.191	-4.422	-4.36	-2.955	-4.677	0.453	-1.683	-1.622	-0.2171	-1.939	0.81115	0.253791	0.251893	0.876273	0.134559
H0YN18	PSMA4	2.174	1.722	1.89	2.149	1.857	1.496	0.4521	-0.2836	-0.02432	-0.3166	-0.6774	0.332022	0.46636	0.942381	0.443618	0.30063
O15145	ARPC3	-0.1321	-0.5836	-0.6067	0.2421	0.4652	-0.5608	0.4515	-0.4746	0.3741	0.5973	-0.4287	0.710247	0.339136	0.518889	0.286462	0.451968
Q9NRN7	AASDHPPT	0.6508	0.1996	0.1472	-0.4929	-0.945	-0.5754	0.4512	-0.5036	-1.144	-1.596	-1.226	0.160887	0.093451	0.020372	0.041158	0.011862
A0A1B0GVS3	ACTR1A	1.955	1.506	1.125	1.63	1.882	1.285	0.4491	-0.8299	-0.3251	-0.07331	-0.6701	0.430695	0.282277	0.438382	0.879421	0.242768
A0A1B0GTP7	ASAH1	-4.412	-4.861	-5.625	-4.782	-4.532	-6.005	0.4485	-1.212	-0.37	-0.1193	-1.592	0.753926	0.384189	0.770826	0.955179	0.191524
O75323	NIPSNAP2	1.368	0.9201	0.8148	0.8341	1.533	0.6652	0.4478	-0.5531	-0.5338	0.1656	-0.7027	0.249381	0.514825	0.091488	0.500746	0.073906
Q7Z5K2	WAPL	-1.805	-2.252	-1.249	-5.583	-1.474	-0.9611	0.4472	0.5554	-3.778	0.3308	0.8437	0.618107	0.606383	0.002273	0.636898	0.254593
M0R2F8	TIMM50	0.7616	0.3146	0.386	0.02541	0.1103	-0.3101	0.447	-0.3756	-0.7362	-0.6513	-1.072	0.544468	0.326749	0.173098	0.147977	0.020825
Q9Y3U8	RPL36	3.761	3.315	3.232	3.41	3.711	3.597	0.4459	-0.5292	-0.3507	-0.0503	-0.1635	0.315856	0.124527	0.398069	0.90956	0.592083
G5E9W3	CPSF3	0.9514	0.5061	0.5453	0.6421	0.275	1.181	0.4453	-0.4061	-0.3094	-0.6764	0.2296	0.368467	0.293363	0.649361	0.211718	0.461056
Q8NCM8	DYNC2H1	2.207	1.761	1.45	0.5098	1.46	2.38	0.4453	-0.7563	-1.697	-0.7468	0.1734	0.614827	0.374872	0.09156	0.479052	0.842867
Q8WW12	PCNP	-2.289	-2.734	-6.243	-4.662	-4.035	-3.486	0.4452	-3.954	-2.373	-1.745	-1.197	0.729576	0.048433	0.278246	0.322429	0.509885
P37837	TALDO1	3.925	3.483	3.136	3.301	3.782	3.637	0.4421	-0.7889	-0.6241	-0.143	-0.2887	0.173631	0.005125	0.020403	0.520864	0.226655
Q9UNM6	PSMD13	2.586	2.145	2.712	3.01	3.056	2.145	0.4411	0.1257	0.4232	0.4698	-0.4417	0.643471	0.375559	0.033624	0.05978	0.233932
Q9NZ45	CISD1	-4.733	-5.171	-6.556	-7.283	-5.845	-7.352	0.4381	-1.822	-2.55	-1.112	-2.619	0.798688	0.119643	0.047849	0.533723	0.044692
D6R974	UCHL1	5.771	5.333	5.237	5.51	5.459	4.951	0.4379	-0.5342	-0.2617	-0.3118	-0.8203	0.320785	0.186992	0.467385	0.308417	0.073581
B4DLN1	B4DLN1	2.748	2.311	2.489	2.455	2.446	2.608	0.4378	-0.2592	-0.294	-0.303	-0.1403	0.1727	0.243044	0.268672	0.107028	0.198433
F5H4Z7	MMAB	0.2218	-0.216	-0.005914	-2.219	-0.417	-2.057	0.4378	-0.2277	0.6903	-0.6388	0.8521	0.349922	0.632088	0.550953	0.316223	0.344245
A0A2R8YE78	OPA1	0.9975	0.5597	1.882	0.5613	0.5685	1.76	0.4378	0.8848	-0.4362	-0.429	0.7626	0.712618	0.421609	0.682202	0.706661	0.439035
Q9H857	NT5DC2	-1.66	-2.097	-1.649	-3.482	-1.312	-3.903	0.4368	0.01121	-1.822	0.3477	-2.243	0.50366	0.971406	0.157572	0.616025	0.01242
O95295	SNAPIN	-2.718	-3.154	-2.826	-3.994	-4.667	-4.335	0.4365	-0.1085	-1.276	-1.949	-1.618	0.809794	0.926993	0.436846	0.282352	0.27114
R4GNH9	EXOSC1	-1.493	-1.927	-1.778	-4.303	-1.651	-2.54	0.4341	-0.2851	-2.811	-0.158	-1.047	0.692218	0.769205	0.20589	0.878898	0.290303
P84243	H3-3A; H3-3B	6.812	6.378	5.45	5.368	6.403	6.755	0.4334	-1.362	-1.443	-0.4088	-0.05699	0.643746	0.154033	0.361282	0.618906	0.927656
A0A7I2YQK6	HSPD1	7.81	7.377	7.497	7.361	7.713	7.602	0.4334	-0.3139	-0.4496	-0.09772	-0.2088	0.01675	0.115014	0.141404	0.45753	0.20906
A0A6Q8PGH0	LMNA	1.654	1.22	1.294	0.7337	1.6	1.52	0.4333	-0.3602	-0.9201	-0.05371	-0.1342	0.421051	0.306113	0.010165	0.896843	0.855713
D6REQ6	RNASET2	-6.617	-7.049	-6.031	-6.878	-6.403	-5.936	0.4323	0.5858	-0.2603	0.2145	0.6813	0.52947	0.551816	0.61353	0.707761	0.51236
C9JXB8	RPL24	5.065	4.634	5.128	4.8	5.218	4.689	0.4309	0.06371	-0.2647	0.1536	-0.3758	0.250486	0.787888	0.277041	0.440984	0.084109
Q9UMY4	SNX12	-1.425	-1.855	-0.6844	-0.05963	-0.5939	-0.9563	0.4303	0.7402	1.365	0.8307	0.4683	0.582495	0.177483	0.054502	0.123383	0.297721
J3QL90	DRG2	-1.079	-1.509	-0.6048	-1.235	-1.746	-1.703	0.4298	0.4741	-0.1565	-0.6673	-0.6246	0.735725	0.313296	0.811709	0.343911	0.1565
P51812	RPS6KA3	-0.5671	-0.9954	-0.8088	-1.667	-0.671	-0.6141	0.4283	-0.2417	-1.1	-0.1039	-0.04707	0.656523	0.758429	0.226288	0.895175	0.950745
S4R3E5	KPNA6	-6.106	-6.533	-6.763	-7.1	-6.122	-6.7	0.427	-0.6566	-0.9936	-0.01586	-0.5936	0.516131	0.326883	0.172426	0.986706	0.368394
A0A0C4DFZ2	ARSA	0.8246	0.3982	0.9108	-2.349	-0.6939	1.029	0.4264	0.08624	-3.173	-1.519	0.2046	0.87413	0.970526	0.10946	0.435245	0.933219
P15289	ARSA	0.8246	0.3982	0.9108	-2.349	-0.6939	1.029	0.4264	0.08624	-3.173	-1.519	0.2046	0.87413	0.970526	0.10946	0.435245	0.933219
A0A7I2V3F3	NCL	6.66	6.234	6.442	6.353	6.45	6.247	0.4259	-0.2176	-0.3066	-0.2091	-0.4125	0.030816	0.290464	0.060878	0.19514	0.180845
F5GWX2	HEBP1	-6.773	-7.199	-6.149	-4.571	-5.375	-6.872	0.4258	0.7849	2.363	1.559	-0.09848	0.312508	0.280263	0.07999	0.050112	0.354967
Q8N4Q1	CHCHD4	-1.96	-2.386	-1.508	-1.335	-1.237	-2.036	0.4252	0.452	0.6257	0.723	-0.07559	0.693724	0.392186	0.339914	0.160113	0.863706
E9PM92	C11orf58	1.408	0.9831	0.9216	1.285	1.312	1.471	0.4249	-0.4864	-0.1233	-0.09565	0.06269	0.075129	0.033858	0.645709	0.658404	0.747785
P78559	MAP1A	1.394	0.9692	2.049	1.107	0.4035	-0.1539	0.4248	0.6554	-0.287	-0.9905	-1.548	0.594548	0.256506	0.658949	0.263076	0.210016
P30086	PEBP1	4.804	4.379	5.09	4.856	4.946	4.731	0.4248	0.2861	0.05243	0.1417	-0.07328	0.526152	0.54215	0.911143	0.775731	0.875703
Q9P2I0	CPSF2	2.291	1.868	0.4715	0.9508	1.079	2.521	0.4229	-1.819	-1.34	-1.212	0.2297	0.672831	0.071766	0.146491	0.346944	0.778886
O00488	ZNF593	-3.972	-4.395	-4.111	-5.373	-5.227	0.2278	0.4228	-0.1388	-1.401	-1.254	-0.241	0.714099	0.932793	0.320221	0.383123	0.801814
Q16512	PKN1	-1.122	-1.545	-0.9043	-1.44	-1.883	-1.761	0.4226	0.2176	-0.3184	-0.7614	-0.6386	0.417338	0.661049	0.578846	0.377191	0.318252
A0A087WZ06	STK3	-1.509	-1.932	-0.9556	-2.495	-1.407	-1.439	0.4223	0.5538	-0.9852	0.1023	0.07016	0.165544	0.00695	0.20025	0.445827	0.798602
Q13188	STK3	-1.509	-1.932	-0.9556	-2.495	-1.407	-1.439	0.4223	0.5538	-0.9852	0.1023	0.07016	0.165544	0.00695	0.20025	0.445827	0.798602
Q01658	DR1	1.658	1.236	0.1545	0.7062	0.9588	1.458	0.4222	-1.503	-0.9518	-0.6992	-0.1998	0.642693	0.075992	0.205495	0.411525	0.779245
C9J9B2	RBMS3	0.8333	0.4114	0.2643	-1.023	0.3943	1.124	0.4218	-0.5689	-1.856	-0.439	0.2907	0.672544	0.474246	0.04412	0.628622	0.691434
P14923	JUP	2.687	2.266	3.425	3.531	3.199	3.082	0.4216	0.7383	0.8441	0.5121	0.3946	0.329735	0.06298	0.056256	0.151801	0.268231
A0A2R8Y6K9	GATD3A	2.932	2.511	2.823	2.757	2.978	2.463	0.4212	-0.1093	-0.1755	0.04586	-0.4698	0.340414	0.550421	0.505153	0.872345	0.325427
O43390	HNRNPR	4.915	4.496	4.533	4.743	4.567	4.648	0.4193	-0.3823	-0.1719	-0.3481	-0.2669	0.236881	0.127138	0.51624	0.261058	0.302768
P61353	RPL27	4.29	3.871	4.015	4.221	4.315	4.162	0.419	-0.2747	-0.0689	0.02557	-0.128	0.24047	0.145447	0.743034	0.868343	0.577055
O00401	WASL	-2.352	-2.769	-3.986	0.1927	-2.25	-2.612	0.417	-1.634	2.545	0.1014	-0.26	0.415557	0.085897	0.108212	0.946242	0.807288
A0A0A0MRF8	RPL17-C18orf32	4.902	4.486	5.038	5.334	5.553	4.752	0.4164	0.1355	0.4315	0.6504	-0.1506	0.543932	0.590208	0.055401	0.003952	0.428786
P18887	XRCC1	0.4401	0.02469	0.805	-0.1331	0.1351	0.07567	0.4154	0.3649	-0.5732	-0.305	-0.3644	0.272583	0.240928	0.115501	0.586362	0.406262
A0A590UJB9	TPM4	3.642	3.227	3.284	3.378	3.638	4.18	0.4151	-0.358	-0.2635	-0.00364	0.5383	0.401192	0.012201	0.129847	0.981243	0.330719
Q9H4I0	RAD21L1	-5.935	-6.349	-2.932	-4.989	-5.907	-0.958	0.4141	3.003	0.9459	0.02797	4.977	0.667096	0.155667	0.618404	0.975277	0.028492
P14854	COX6B1	2.585	2.173	1.802	2.055	2.097	2.338	0.4127	-0.7832	-0.5309	-0.4886	-0.2471	0.204279	0.018286	0.047662	0.172016	0.074859
P04259	KRT6B	-1.073	-1.484	-2.157	-2.297	-1.079	-2.013	0.4115	-1.084	-1.224	-0.005986	-0.9396	0.595549	0.140002	0.341186	0.995894	0.218499
A0A0U1RQK4	ADPRHL1	-0.3977	-0.8089	0.5178	0.07454	-1.325	-0.05819	0.4112	0.9155	0.4722	-0.927	0.3395	0.616386	0.067076	0.642745	0.268813	0.765735
Q01968	OCRL	0.9586	0.5479	0.5513	0.09192	0.1047	-0.1752	0.4107	-0.4073	-0.8667	-0.8539	-1.134	0.38728	0.385583	0.209727	0.27967	0.051207
Q13542	EIF4EBP2	-0.4957	-0.9063	0.6768	-0.1717	-0.2489	-0.3225	0.4106	1.173	0.324	0.2468	0.1733	0.718284	0.069673	0.534277	0.714904	0.764783
P42772	CDKN2B	-0.8635	-1.273	-1.495	-2.916	0.01986	-2.723	0.4094	-0.6319	-2.052	0.8834	-1.859	0.743751	0.662306	0.29062	0.139817	0.182989
P22492	H1-6	-2.572	-2.981	-4.671	-4.18	-3.513	-3.896	0.4086	-2.099	-1.608	-0.9404	-1.324	0.867217	0.266592	0.421396	0.609736	0.512581
Q96E39	RBMXL1	-4.251	-4.66	-6.604	-1.154	-5.24	-5.944	0.4086	-2.353	3.097	-0.9886	-1.693	0.724137	0.014872	0.141113	0.346605	0.076313
Q9Y3A5	SBDS	1.199	0.7902	2.129	2.021	0.6999	1.068	0.4084	0.9302	0.8224	-0.4987	-0.1311	0.65398	0.26015	0.307196	0.597674	0.755472
O43819	SCO2	-2.806	-3.214	-4.507	-2.679	-4.061	-2.091	0.408	-1.701	0.1268	-1.255	0.7151	0.787657	0.25506	0.932803	0.469534	0.615339
Q7RTV0	PHF5A	0.1505	-0.2565	-0.1092	0.5513	0.6933	0.5671	0.4071	-0.2597	0.4008	0.5428	0.4166	0.194731	0.591969	0.10691	0.035673	0.152406
G3V4X3	NDRG2	-6.642	-7.047	-8.118	-6.47	-6.274	-6.808	0.4056	-1.477	0.1712	0.3675	-0.1668	0.572396	0.231116	0.893231	0.298925	0.499701
Q00577	PURA	0.07192	-0.3329	-0.06065	0.5398	0.1099	0.09731	0.4048	-0.1326	0.4679	0.03799	0.02539	0.596321	0.71798	0.118235	0.919527	0.92959
P51452	DUSP3	1.078	0.6765	0.7526	0.1666	0.1111	0.4392	0.4016	-0.3256	-0.9115	-0.967	-0.6389	0.281522	0.284541	0.009764	0.090134	0.174139
B4DEB1	H3-3A	6.394	5.992	4.896	5.055	5.962	6.185	0.4016	-1.497	-1.339	-0.4314	-0.2084	0.720468	0.175485	0.412954	0.659269	0.819308
K7EMV3	H3-3B	6.394	5.992	4.896	5.055	5.962	6.185	0.4016	-1.497	-1.339	-0.4314	-0.2084	0.720468	0.175485	0.412954	0.659269	0.819308
P52209	PGD	4.909	4.508	4.622	4.77	4.754	4.624	0.4012	-0.2866	-0.1393	-0.1553	-0.2852	0.027065	0.226573	0.299118	0.168373	0.111008
O60271	SPAG9	1.849	1.448	1.713	1.545	0.5186	1.826	0.4007	-0.136	-0.3038	-1.33	-0.02234	0.377611	0.618042	0.624353	0.001116	0.958343
A0A087WT44	HMOX2	0.8565	0.4559	-0.7471	0.3465	0.02918	0.6224	0.4006	-1.604	-0.5099	-0.8273	-0.234	0.38811	0.011713	0.12296	0.29871	0.327473
Q8IUX4	APOBEC3F	-1.438	-1.838	-0.5252	-3.3	-0.4144	-1.278	0.4005	0.9127	-1.862	1.023	0.1601	0.71747	0.359687	0.330502	0.356799	0.874272
P50213	IDH3A	2.672	2.272	2.381	2.504	2.592	2.566	0.4	-0.2907	-0.168	-0.08048	-0.106	0.217194	0.187339	0.481985	0.721423	0.614265
Q7Z7H5	TMED4	-0.6429	-1.042	-0.5655	-2.506	-3.175	-1.987	0.3992	0.07737	-1.863	-2.532	-1.344	0.529018	0.814306	0.04872	0.112813	0.096396
O00193	SMAP	1.372	0.9734	0.9205	1.285	1.295	1.428	0.3984	-0.4514	-0.08711	-0.07663	0.05578	0.106001	0.052378	0.749441	0.730353	0.77056
Q14232	EIF2B1	0.4208	0.02259	0.569	0.3311	-0.1498	0.01192	0.3982	0.1482	-0.08966	-0.5706	-0.4089	0.62348	0.786075	0.907658	0.287799	0.601769
P39748	FEN1	2.694	2.296	2.598	2.929	2.519	2.648	0.3981	-0.09625	0.2352	-0.1747	-0.04572	0.035447	0.578646	0.397768	0.629877	0.850265
P32322	PYCR1	1.365	0.9684	-1.051	1.896	1.397	0.4451	0.3969	-2.417	0.5312	0.0314	-0.9201	0.857732	0.408216	0.793336	0.986766	0.68472
A0A0B4J2A0	A0A0B4J2A0	-0.02519	-0.4216	-0.5985	-0.2375	0.9965	-0.9857	0.3964	-0.5733	-0.2123	1.022	-0.9606	0.430388	0.436231	0.669118	0.45931	0.092948
Q9UHJ6	SHPK	-0.02519	-0.4216	-0.5985	-0.2375	0.9965	-0.9857	0.3964	-0.5733	-0.2123	1.022	-0.9606	0.430388	0.436231	0.669118	0.45931	0.092948
J3KS57	SCRN2	-6.87	-7.266	-6.06	-6.847	-6.841	-6.719	0.396	0.8104	0.02342	0.02893	0.1517	0.237532	0.449138	0.725278	0.713253	0.169088
Q9NPJ3	ACOT13	0.2717	-0.124	-1.486	0.091	-0.4468	-0.5449	0.3957	-1.758	-0.1807	-0.7185	-0.8166	0.552174	0.000945	0.798938	0.386805	0.285861
P62857	RPS28	4.468	4.074	4.118	4.25	4.429	4.615	0.3935	-0.3493	-0.2175	-0.03873	0.1469	0.247253	0.212268	0.461449	0.854432	0.46962
P84085	ARF5	-6.213	-6.606	-5.096	-3.534	-6.036	-6.817	0.3933	1.117	2.679	0.1762	-0.6045	0.67896	0.33055	0.11711	0.857882	0.446649
E9PQA4	NXF1	-3.743	-4.136	-4.588	-3.3	-2.948	-2.381	0.3922	-0.8448	0.4436	0.7952	1.362	0.788417	0.649506	0.82093	0.595727	0.418614
V9GYD0	ARL2-SNX15	-2.531	-2.922	-1.898	-2.039	-2.697	-3.117	0.3914	0.6329	0.4915	-0.1659	-0.5862	0.785304	0.406168	0.302382	0.782596	0.33396
P49189	ALDH9A1	3.632	3.24	3.125	2.999	3.11	2.983	0.3912	-0.5065	-0.6323	-0.5222	-0.6488	0.200929	0.007811	0.142352	0.173592	0.056689
Q9P015	MRPL15	0.06142	-0.3294	-0.1942	-1.497	0.2839	-1.328	0.3908	-0.2556	-1.559	0.2225	-1.389	0.467825	0.478197	0.011446	0.515681	0.018068
E5RI01	RAD21	-2.128	-2.518	-1.302	-3.758	-2.04	-2.94	0.3903	0.8259	-1.63	0.088	-0.8122	0.754939	0.465016	0.333951	0.947685	0.576367
E7ERX9	KIF13B	0.547	0.1569	-0.3833	-0.1711	-0.0276	0.8907	0.3901	-0.9303	-0.7181	-0.5746	0.3437	0.68282	0.157079	0.401227	0.48754	0.502317
B7Z6J7	CNOT3	-1.059	-1.449	-2.16	-1.473	-0.8566	-1.117	0.39	-1.101	-0.4141	0.202	-0.05832	0.692772	0.473936	0.655968	0.850743	0.945071
Q9H2G2	SLK	-0.5285	-0.9183	-0.131	-0.9657	0.02543	-0.1074	0.3898	0.3975	-0.4372	0.5539	0.4211	0.593914	0.461791	0.373659	0.353092	0.501317
P09669	COX6C	-0.2451	-0.6342	-0.2529	-1.398	-0.009109	0.02641	0.3891	-0.007737	-1.153	0.236	0.2715	0.61586	0.989895	0.180838	0.431963	0.466029
C9J8T0	EEFSEC	-2.295	-2.683	-5.095	-4.922	-4.549	-3.746	0.3877	-2.8	-2.627	-2.254	-1.451	0.77651	0.018129	0.127945	0.028804	0.202596
O14908	GIPC1	0.4333	0.04627	-0.1265	0.376	0.4391	-0.1249	0.387	-0.5597	-0.05725	0.005828	-0.5581	0.599388	0.200982	0.920014	0.992584	0.347463
A0A087WYT3	PTGES3	3.546	3.16	3.283	3.957	3.739	3.592	0.386	-0.2627	0.411	0.1929	0.04678	0.488659	0.479974	0.272344	0.645815	0.923097
Q9UHX1	PUF60	2.617	2.232	3.263	2.884	2.94	2.379	0.3846	0.6463	0.267	0.3232	-0.2378	0.542632	0.04562	0.267809	0.245175	0.109399
O00461	GOLIM4	-0.632	-1.015	-1.35	-1.541	0.04787	-0.3433	0.3825	-0.7184	-0.9094	0.6799	0.2888	0.599414	0.111545	0.086884	0.135718	0.700019
P51580	TPMT	-3.294	-3.676	-4	-3.614	-6.522	-4.976	0.3823	-0.7063	-0.3199	-3.228	-1.682	0.746418	0.429839	0.674265	0.013943	0.118876
P0DPI2	GATD3	3.778	3.397	3.327	3.583	3.621	3.43	0.381	-0.4513	-0.1956	-0.1572	-0.3484	0.166866	0.011266	0.258914	0.50182	0.267593
C9J1E5	STAM	-3.295	-3.676	-4.707	-4.03	-3.558	-3.053	0.3807	-1.412	-0.7353	-0.2632	0.2427	0.822842	0.317894	0.604815	0.816372	0.775913
J3KRR0	LIMD2	-0.3448	-0.7251	-1.254	-0.9198	-0.6485	0.5064	0.3803	-0.9091	-0.5751	-0.3038	0.8512	0.491491	0.262631	0.318121	0.582309	0.066702
Q9Y6W5	WASF2	0.1536	-0.2264	-0.129	0.6847	0.06144	0.3134	0.38	-0.2826	0.5311	-0.09214	0.1599	0.506806	0.430141	0.075648	0.692582	0.420322
A0A2R8Y619	H2BE1	-6.809	-7.189	-6.373	-5.91	-6.772	-6.411	0.3799	0.4361	0.8997	0.03778	0.3988	0.350086	0.73974	0.223965	0.619179	0.255508
Q9NR50	EIF2B3	2.316	1.937	1.199	0.6196	1.606	1.167	0.3795	-1.117	-1.696	-0.7104	-1.149	0.565806	0.11627	0.034041	0.425768	0.104645
O00506	STK25	-4.691	-5.07	-8.14	-7.69	-5.581	-6.614	0.3787	-3.449	-2.999	-0.8901	-1.923	0.705184	0.022589	0.003489	0.36838	0.026205
K7ENZ6	RETREG3	-2.622	-2.999	-4.579	-2.762	-2.628	-3.012	0.3771	-1.957	-0.1399	-0.006162	-0.3898	0.75345	0.095625	0.822583	0.990758	0.387689
Q13948	CUX1	-6.84	-7.217	-6.958	-4.99	-6.452	-6.547	0.3764	-0.1178	1.851	0.3887	0.2932	0.31909	0.824733	0.147691	0.553106	0.173968
Q8IYI6	EXOC8	0.284	-0.08861	-0.1898	0.9445	0.8612	-0.3081	0.3727	-0.4738	0.6604	0.5772	-0.5921	0.799176	0.655184	0.608709	0.701519	0.594289
Q96ST2	IWS1	1.283	0.9111	1.099	0.7045	0.521	0.9756	0.3721	-0.1839	-0.5787	-0.7622	-0.3077	0.290795	0.696048	0.007534	0.164322	0.253912
P21912	SDHB	1.684	1.312	1.293	1.082	0.9377	1.535	0.3721	-0.3918	-0.6023	-0.7468	-0.1493	0.278965	0.140738	0.049041	0.080072	0.687369
H3BPQ6	HDGFL3	-6.861	-7.233	-6.302	-2.615	-6.876	-5.679	0.372	0.5581	4.246	-0.01537	1.182	0.389834	0.336393	0.019189	0.865828	0.295243
Q96T76	MMS19	-1.677	-2.049	-2.113	-2.892	-2.785	-1.941	0.3719	-0.4361	-1.216	-1.108	-0.2636	0.571955	0.518167	0.116957	0.366516	0.655248
P24539	ATP5PB	1.532	1.161	1.133	1.192	1.163	1.489	0.3713	-0.3995	-0.3398	-0.3692	-0.04348	0.331122	0.165649	0.351562	0.163074	0.861043
Q9H2W6	MRPL46	-0.096	-0.4672	-0.07236	0.3228	-0.5033	-0.3545	0.3712	0.02364	0.4188	-0.4073	-0.2585	0.493175	0.955658	0.320326	0.437018	0.680163
Q9NZI7	UBP1	-1.071	-1.442	-0.1366	-2.435	-1.53	-1.553	0.3712	0.9343	-1.364	-0.4594	-0.4816	0.645974	0.082441	0.057902	0.348843	0.673623
O43719	HTATSF1	0.4982	0.1277	2.133	0.2749	0.6653	1.487	0.3705	1.635	-0.2233	0.1671	0.9892	0.664332	0.104622	0.778517	0.842497	0.404837
Q9Y6Y8	SEC23IP	1.198	0.8271	1.197	1.455	1.017	1.351	0.3705	-0.0004154	0.2578	-0.1807	0.1531	0.582676	0.999246	0.557507	0.659463	0.696436
Q9Y2V2	CARHSP1	1.636	1.266	1.364	1.95	2.132	1.772	0.3704	-0.2722	0.3134	0.4957	0.1354	0.645283	0.508945	0.573735	0.247093	0.788957
A0A1B0GW73	A0A1B0GW73	-0.3044	-0.673	1.637	-0.5945	-0.8945	-0.9322	0.3686	1.942	-0.2901	-0.5901	-0.6278	0.737726	0.138495	0.72768	0.50004	0.466986
H3BNF1	CLN6	-0.3044	-0.673	1.637	-0.5945	-0.8945	-0.9322	0.3686	1.942	-0.2901	-0.5901	-0.6278	0.737726	0.138495	0.72768	0.50004	0.466986
H3BRN7	H3BRN7	-0.3044	-0.673	1.637	-0.5945	-0.8945	-0.9322	0.3686	1.942	-0.2901	-0.5901	-0.6278	0.737726	0.138495	0.72768	0.50004	0.466986
P49915	GMPS	2.936	2.568	2.885	3.052	3.023	2.907	0.3684	-0.05176	0.1158	0.08706	-0.02979	0.380926	0.795703	0.651439	0.780933	0.911564
B4DY09	ILF2	4.019	3.65	4.417	3.964	3.989	4.055	0.3684	0.3986	-0.05486	-0.02961	0.03656	0.486035	0.056365	0.609696	0.784376	0.714674
I3L3B0	C1QBP	2.811	2.444	3.559	3.255	3.045	2.755	0.3666	0.7482	0.4442	0.2343	-0.05532	0.539803	0.095688	0.412624	0.575683	0.842076
A0MZ66	SHTN1	0.8208	0.4545	0.02462	0.413	-0.2448	0.2623	0.3663	-0.7962	-0.4079	-1.066	-0.5586	0.464688	0.208116	0.412616	0.260225	0.624575
F8VUB6	AAAS	-0.8286	-1.194	-0.8171	-0.7344	-0.8113	-0.6132	0.3658	0.01153	0.09421	0.01728	0.2154	0.455638	0.971639	0.790759	0.961713	0.546985
Q8NFI4	ST13P5	3.384	3.018	3.951	3.888	3.587	3.505	0.3657	0.5672	0.5047	0.203	0.1219	0.224056	0.080648	0.253163	0.407625	0.681911
E9PKP7	UBTF	4.461	4.095	3.984	4.049	4.521	4.231	0.3655	-0.477	-0.4118	0.05995	-0.2301	0.454926	0.303317	0.376384	0.900418	0.572219
A0A804HIF1	FGFR1	-3.013	-3.377	-3.963	-6.289	-3.105	-3.908	0.3646	-0.9504	-3.277	-0.09279	-0.8959	0.837358	0.530451	0.029075	0.963267	0.448812
A0A804HKG0	ACTN2	-6.769	-7.134	-5.669	-6.893	-7.057	-4.634	0.3645	1.1	-0.124	-0.2879	2.135	0.772317	0.449223	0.918599	0.815788	0.217268
Q9UJV9	DDX41	0.1546	-0.2096	0.1623	0.08298	1.005	-0.05249	0.3642	0.007776	-0.07157	0.8507	-0.207	0.571843	0.988022	0.875586	0.460012	0.740321
Q9Y4W6	AFG3L2	2.758	2.394	1.886	2.298	2.25	2.506	0.3641	-0.8718	-0.4597	-0.5075	-0.2519	0.520728	0.185332	0.342034	0.469966	0.581003
A0A7I2YQV1	RHOA	2.389	2.026	1.884	1.939	2.586	2.061	0.3635	-0.5057	-0.4501	0.197	-0.3284	0.025833	0.084843	0.142958	0.454745	0.066936
D6RJE2	ADD1	-0.403	-0.7663	-0.6417	-1.428	-0.7187	-0.3056	0.3633	-0.2387	-1.025	-0.3157	0.09738	0.161836	0.498034	0.171992	0.490326	0.611953
F8WBL2	BYSL	-6.822	-7.184	-6.362	-7.708	-6.742	-7.622	0.362	0.4597	-0.8862	0.08018	-0.7996	0.380088	0.391677	0.1624	0.086888	0.03899
Q14676	MDC1	3.631	3.27	3.71	3.015	3.31	3.165	0.3614	0.07864	-0.6155	-0.321	-0.4657	0.085057	0.653712	0.016514	0.173484	0.069541
V9GZ37	HSPA1A	8.134	7.777	9.297	7.32	7.753	7.898	0.3569	1.163	-0.8144	-0.3813	-0.2358	0.372014	2.5e-05	0.00377	0.014552	0.155716
Q8N9G1	SEC16A	-2.922	-3.279	-1.673	-1.701	-2.018	-1.913	0.3569	1.25	1.221	0.9039	1.009	0.79318	0.282258	0.25051	0.574835	0.428025
H3BPN2	DCTPP1	0.3051	-0.05128	-0.2492	0.3633	-1.344	-0.005974	0.3564	-0.5543	0.05821	-1.649	-0.3111	0.206924	0.082906	0.794982	0.30297	0.302043
P62937	PPIA	8.471	8.115	8.371	8.298	8.398	8.345	0.3561	-0.09991	-0.1728	-0.07249	-0.1259	0.107391	0.438481	0.315831	0.594599	0.314275
Q9BWJ5	SF3B5	1.997	1.641	1.881	2.289	0.8111	2.029	0.356	-0.1153	0.2918	-1.186	0.0327	0.294215	0.693761	0.618983	0.189705	0.909341
F8W1I5	MYL6B	-6.894	-7.248	-6.659	-5.366	-4.757	-7.13	0.3544	0.2349	1.528	2.136	-0.2367	0.399416	0.124553	0.261739	0.140242	0.327535
Q96GK7	FAHD2A	-0.7011	-1.055	-1.081	-2.884	0.02655	0.5662	0.354	-0.3801	-2.183	0.7276	1.267	0.82393	0.712564	0.181619	0.552204	0.292835
A0A0A0MSA9	PVR	-0.06108	-0.4136	-3.866	-2.041	-0.9131	-1.186	0.3525	-3.805	-1.98	-0.852	-1.125	0.746827	0.0887	0.104409	0.601425	0.366951
P19013	KRT4	-2.692	-3.044	-5.209	-2.733	1.2	-6.136	0.3519	-2.516	-0.04099	3.892	-3.443	0.884066	0.254966	0.972865	0.021437	0.032368
Q9H0C2	SLC25A31	-6.851	-7.202	-6.735	-6.05	-4.85	-6.829	0.3511	0.1162	0.8013	2.001	0.0226	0.349224	0.232567	0.352883	0.367644	0.713428
O75937	DNAJC8	1.459	1.108	1.801	1.276	1.485	1.379	0.351	0.342	-0.1832	0.02619	-0.08047	0.418586	0.237217	0.447504	0.938398	0.738972
A0A590UJS4	NIPBL	-0.6615	-1.012	0.3159	-1.962	0.5435	0.4304	0.3506	0.9774	-1.3	1.205	1.092	0.851413	0.524363	0.460504	0.435684	0.479296
Q6K0P9	PYHIN1	-5.009	-5.358	-4.298	-7.361	-3.623	-2.606	0.3495	0.7104	-2.352	1.386	2.403	0.759623	0.494776	0.005539	0.395102	0.09344
O95218	ZRANB2	1.1	0.7508	1.644	0.6784	0.2957	0.5762	0.3493	0.5436	-0.4217	-0.8044	-0.5239	0.5095	0.365223	0.529101	0.316734	0.138872
A0A024R4E5	HDLBP	4.12	3.772	4.392	3.976	4.106	4.256	0.3488	0.2576	-0.1439	-0.02898	0.1218	0.194373	0.540252	0.612354	0.922067	0.662364
A0A7P0T8L6	ACSL3	2.038	1.691	1.496	1.007	1.376	0.7917	0.3472	-0.5422	-1.031	-0.6621	-1.246	0.485489	0.281089	0.045852	0.290672	0.021839
P28074	PSMB5	2.268	1.921	1.346	1.954	1.719	1.739	0.3471	-0.9222	-0.3141	-0.5495	-0.5289	0.446982	0.060174	0.577949	0.308119	0.177892
F8WC70	UGP2	2.628	2.281	-4.598	1.971	-4.917	2.621	0.347	-0.7318	-0.6576	-1.05	-0.006698	0.470861	0.489855	0.176043	0.389467	0.99249
Q9NZI8	IGF2BP1	4.806	4.46	4.095	4.058	4.178	4.224	0.346	-0.711	-0.7482	-0.6279	-0.5817	0.355997	0.087161	0.075275	0.042017	0.054601
Q5QPM7	PSMF1	0.9843	0.6386	1.022	0.5882	0.6467	0.8939	0.3458	0.0372	-0.3961	-0.3377	-0.09042	0.368738	0.900651	0.430836	0.393099	0.802409
P60174	TPI1	6.119	5.773	6.612	5.862	6.281	6.773	0.3455	0.4929	-0.2566	0.1625	0.6543	0.301213	0.055386	0.27557	0.576651	0.068575
Q99832	CCT7	5.74	5.395	5.243	5.556	5.543	5.619	0.3451	-0.4971	-0.1844	-0.1974	-0.1219	0.160109	0.016264	0.393289	0.192879	0.326275
A0A087WVF5	GPSM1	-5.439	-5.782	-4.135	-5.445	-4.768	-2.907	0.343	1.304	-0.00593	0.6708	2.532	0.811465	0.360804	0.995819	0.623651	0.045445
Q5T7C4	HMGB1	4.709	4.367	3.883	4.551	4.086	4.695	0.3427	-0.8266	-0.1581	-0.6236	-0.01426	0.464796	0.089978	0.772445	0.271031	0.972957
K7ELQ0	MRPL4	0.6463	0.3054	1.167	1.468	0.4333	0.7506	0.3409	0.5212	0.8219	-0.213	0.1043	0.572678	0.300343	0.137774	0.633786	0.794007
P62263	RPS14	5.035	4.694	4.44	4.603	5.048	5.048	0.3402	-0.5948	-0.4312	0.01312	0.01343	0.224391	0.039017	0.171351	0.931641	0.931736
P55769	SNU13	-0.3905	-0.7302	-1.448	-1.851	-1.701	-0.9049	0.3397	-1.058	-1.461	-1.311	-0.5144	0.637904	0.2598	0.189304	0.137444	0.559592
Q15334	LLGL1	1.503	1.165	1.632	0.8713	0.7967	0.4013	0.3381	0.1288	-0.632	-0.7066	-1.102	0.41314	0.812898	0.104717	0.103396	0.077461
O95817	BAG3	0.08126	-0.2561	-0.4918	-0.9661	-0.2213	-0.7273	0.3374	-0.5731	-1.047	-0.3026	-0.8085	0.455424	0.198069	0.085327	0.439793	0.098037
P23443	RPS6KB1	-0.7676	-1.105	-1.219	-0.8401	-0.7784	-2.174	0.3373	-0.4515	-0.07244	-0.01076	-1.406	0.517398	0.243023	0.777803	0.964552	0.169871
Q6UXH1	CRELD2	-3.513	-3.849	-2.494	-5.041	-2.706	-3.767	0.3367	1.019	-1.528	0.8064	-0.254	0.81755	0.284867	0.276361	0.488856	0.820593
P48637	GSS	0.844	0.5082	0.3817	1.057	0.9455	0.2127	0.3358	-0.4623	0.2134	0.1015	-0.6313	0.641827	0.459271	0.699473	0.86248	0.315774
A0A087WX48	APOBEC3D	-6.772	-7.108	-5.997	-5.38	-7.046	-5.66	0.3352	0.7751	1.393	-0.2737	1.113	0.519684	0.390367	0.237342	0.532589	0.252717
A0A2U3TZM0	CHD4	4.098	3.763	4.06	-6.876	3.868	3.906	0.3352	-0.03771	-2.542	-0.2302	-0.1918	0.270037	0.903988	0.178736	0.631854	0.560828
A0A0C4DGS1	DDOST	2.452	2.118	2.628	2.585	2.567	2.366	0.3348	0.176	0.1328	0.1144	-0.08673	0.406959	0.481758	0.675888	0.771423	0.740823
E9PG32	DNAH12	1.578	1.244	1.161	0.9916	0.6045	1.708	0.3343	-0.4174	-0.5864	-0.9735	0.1296	0.386638	0.461246	0.301887	0.030579	0.7145
G5E9R5	ACP1	1.873	1.539	2.258	0.7101	0.8245	2.183	0.3334	0.3856	-1.162	-1.048	0.3102	0.652563	0.264312	0.071828	0.341643	0.277664
Q6P1R4	DUS1L	-4.14	-4.472	-5.521	-4.502	-4.635	-4.057	0.3326	-1.381	-0.3627	-0.4959	0.08258	0.809536	0.288487	0.796557	0.711362	0.947078
B7Z8J4	NMT1	1.76	1.428	1.211	1.575	1.756	0.9339	0.3321	-0.5493	-0.1855	-0.004167	-0.8266	0.299264	0.156994	0.577784	0.990472	0.007613
Q96GM8	TOE1	-2.018	-2.35	-1.227	-1.622	-0.9932	-1.492	0.332	0.7915	0.3963	1.025	0.5265	0.796067	0.159638	0.476904	0.154584	0.361924
Q9NR09	BIRC6	0.658	0.3269	1.445	1.809	0.6348	0.4492	0.331	0.7869	1.151	-0.02322	-0.2088	0.62009	0.090602	0.055695	0.97604	0.658503
A0A7I2V384	PARP1	2.528	2.197	2.705	3.217	2.14	2.758	0.331	0.1765	0.6887	-0.3885	0.2293	0.676666	0.519987	0.088283	0.291159	0.292544
P30044	PRDX5	2.763	2.433	2.521	2.393	2.702	2.751	0.3307	-0.2428	-0.3709	-0.06191	-0.01278	0.138073	0.265561	0.183291	0.787315	0.954488
X6RA56	DCTN3	-6.883	-7.213	-6.829	-3.623	-5.364	-6.837	0.3304	0.05381	3.26	1.518	0.04592	0.412331	0.624507	0.038082	0.132216	0.810085
Q08043	ACTN3	-0.6911	-1.021	-0.3721	0.5839	-0.2603	-0.6729	0.3295	0.319	1.275	0.4308	0.01821	0.671707	0.754138	0.10222	0.583401	0.986748
P0C7P4	UQCRFS1P1	-6.853	-7.181	-2.074	-6.917	-6.38	-3.523	0.3289	4.779	-0.0644	0.4727	3.33	0.86297	0.061951	0.97259	0.805346	0.147255
P09661	SNRPA1	1.495	1.167	1.511	1.954	1.43	1.123	0.3281	0.01587	0.4585	-0.06585	-0.3729	0.536163	0.959233	0.274369	0.828998	0.298919
D6RBM3	CASP6	-3.286	-3.614	-4.422	-4.959	-3.229	-5.092	0.3277	-1.136	-1.673	0.05672	-1.806	0.789274	0.476412	0.210544	0.965949	0.184939
A0A590UK34	CUL1	-6.853	-7.18	-4.788	-4.598	-5.982	-5.68	0.3274	2.065	2.255	0.8703	1.173	0.440062	0.0819	0.094288	0.343305	0.447763
Q12929	EPS8	-1.854	-2.181	-0.9832	-1.283	-4.343	-1.804	0.3273	0.8709	0.5716	-2.489	0.04986	0.782636	0.530514	0.720141	0.13148	0.973536
A0A087X2D0	SRSF3	3.262	2.937	3.133	1.499	3.288	3.546	0.3249	-0.1284	-1.763	0.02649	0.2841	0.331057	0.651451	0.204006	0.887671	0.285854
Q9BVP2	GNL3	-1.491	-1.814	-1.393	2.383	-2.093	-1.527	0.3237	0.09795	-0.662	-0.6028	-0.03634	0.778357	0.845318	0.200695	0.43915	0.947056
M0R3C7	SYMPK	0.2226	-0.1009	1	1.006	-0.2201	-0.07622	0.3235	0.7778	0.7835	-0.4427	-0.2988	0.638116	0.397916	0.251324	0.486897	0.675342
Q99959	PKP2	-0.5448	-0.8682	-0.8733	-0.262	-0.6598	-0.08867	0.3234	-0.3284	0.2829	-0.115	0.4562	0.525798	0.573425	0.532531	0.709942	0.19441
Q6P2S0	SRP9	2.3	1.977	2.174	3.365	2.501	3.147	0.3234	-0.1265	1.065	0.2001	0.8464	0.321565	0.835105	0.250306	0.713059	0.198584
P78316	NOP14	1.155	0.8328	1.165	1.069	0.6114	1.274	0.3226	0.009825	-0.08618	-0.5439	0.1186	0.47005	0.982565	0.815313	0.167981	0.726139
Q9UFW8	CGGBP1	-3.783	-4.105	-4.688	-5.335	-2.778	-2.836	0.3217	-0.905	-1.551	1.005	0.9471	0.854307	0.560216	0.301093	0.421198	0.486085
Q16864	ATP6V1F	-0.6006	-0.9207	-2.668	-2.145	-2.122	-0.5972	0.3201	-2.067	-1.545	-1.521	0.003469	0.647355	0.171434	0.025195	0.044976	0.990153
A5YKK6	CNOT1	1.943	1.623	2.372	1.067	1.482	2.502	0.3198	0.4295	-0.8759	-0.4611	0.5595	0.584649	0.034193	0.00211	0.25306	0.132787
Q5VUA4	ZNF318	-0.5906	-0.9103	-0.2662	-2.477	-0.6666	-0.1577	0.3197	0.3244	-1.887	-0.07604	0.4329	0.710485	0.620169	0.042926	0.937048	0.510106
A8MTJ3	GNAT3	-4.84	-5.16	-1.924	-2.944	-3.332	-3.798	0.3193	2.916	1.896	1.508	1.043	0.871213	0.150453	0.302909	0.417167	0.582206
Q86YS6	RAB43	-5.995	-6.315	-6.287	-0.8256	-5.437	-4.195	0.3193	-0.2918	5.17	0.5581	1.8	0.71174	0.716951	0.000498	0.633287	0.060098
F8WAR4	CHCHD3	0.4664	0.1473	0.1044	0.3484	0.4114	0.252	0.3191	-0.3619	-0.1179	-0.05495	-0.2143	0.372077	0.197111	0.544892	0.692178	0.422527
H0YN26	ANP32A	2.815	2.496	2.703	2.865	2.884	2.702	0.319	-0.112	0.04948	0.06869	-0.1132	0.463585	0.696252	0.885626	0.773136	0.594583
Q13451	FKBP5	-0.08458	-0.4033	0.4749	-0.3394	-0.1202	0.4415	0.3187	0.5595	-0.2548	-0.03561	0.5261	0.453071	0.192711	0.515523	0.938297	0.164351
P63220	RPS21	3.973	3.656	3.755	3.825	3.7	4.211	0.3171	-0.2176	-0.1476	-0.273	0.2385	0.313293	0.481763	0.555686	0.303533	0.367754
F5H1Y4	GOPC	-2.166	-2.482	-2.518	-2.585	-3.23	-0.866	0.3166	-0.3525	-0.4192	-1.065	1.3	0.780936	0.784066	0.747143	0.462689	0.188658
P20042	EIF2S2	0.9164	0.6	0.8847	0.8168	0.6447	0.365	0.3164	-0.03173	-0.09962	-0.2717	-0.5514	0.12228	0.854626	0.770913	0.209652	0.102478
Q9NPD8	UBE2T	-3.794	-4.11	-2.174	-4.73	-3.801	-1.541	0.316	1.621	-0.9355	-0.006436	2.253	0.839456	0.130759	0.53031	0.995949	0.047494
Q00059	TFAM	1.179	0.864	1.317	0.6278	0.9925	1.084	0.3146	0.1385	-0.5508	-0.1862	-0.09493	0.517946	0.499018	0.038909	0.403092	0.831406
F8WEH5	APEH	0.5222	0.2078	-0.9054	0.01978	1.418	0.1296	0.3144	-1.428	-0.5024	0.8957	-0.3926	0.693415	0.004573	0.170854	0.278745	0.541317
J3KQ69	MCM3	-6.859	-7.173	-4.249	-5.444	-5.729	-6.812	0.3142	2.61	1.415	1.13	0.04725	0.399188	0.049224	0.098296	0.17913	0.598512
P30040	ERP29	2.302	1.988	2.287	2.799	2.276	2.273	0.3135	-0.01495	0.4977	-0.02569	-0.0285	0.262595	0.966337	0.115062	0.947698	0.915754
Q9NX55	HYPK	0.08195	-0.2294	0.111	0.6496	-0.2924	-0.6999	0.3113	0.02904	0.5677	-0.3744	-0.7819	0.794025	0.959544	0.316142	0.577437	0.309884
G3V582	GPHN	-6.465	-6.776	-6.892	-4.854	-5.078	-6.329	0.311	-0.4269	1.611	1.387	0.136	0.814616	0.720337	0.286023	0.368327	0.934356
P50990	CCT8	6.414	6.103	6.202	6.433	6.46	6.432	0.3104	-0.212	0.01966	0.04608	0.01836	0.282743	0.258205	0.887889	0.696947	0.870423
H0YKX3	PCLAF	-3.328	-3.638	-2.186	-2.793	-3.91	-2.517	0.3098	1.142	0.5353	-0.5825	0.8113	0.842018	0.306008	0.715036	0.718108	0.538437
Q5TZA2	CROCC	1.205	0.8962	-0.09266	0.8029	0.9422	1.652	0.3091	-1.298	-0.4024	-0.263	0.4463	0.377358	0.066383	0.333181	0.708707	0.170034
Q00341	HDLBP	4.135	3.826	4.374	4.012	4.092	4.229	0.3085	0.2541	-0.1224	-0.02846	0.109	0.239612	0.547461	0.656427	0.92482	0.69743
P49441	INPP1	-2.575	-2.881	-5.879	-3.331	-1.942	-4.732	0.306	-3.304	-0.7561	0.6329	-2.157	0.821759	0.015674	0.319261	0.749805	0.007424
Q9HD20	ATP13A1	0.03613	-0.2694	0.01312	0.2134	-0.2876	0.3549	0.3055	-0.023	0.1773	-0.3238	0.3188	0.583508	0.948493	0.419016	0.413886	0.172721
Q9NQI0	DDX4	-3.475	-3.781	-4.936	-4.232	-4.248	-5.217	0.3054	-1.461	-0.7567	-0.7727	-1.742	0.758422	0.213971	0.589202	0.683158	0.06058
I3L0K7	TRAP1	3.874	3.57	2.963	3.356	3.807	3.867	0.3044	-0.9109	-0.5188	-0.06738	-0.007751	0.451722	0.028629	0.166249	0.833736	0.980982
Q9UPN7	PPP6R1	-0.9348	-1.239	-0.489	-0.2006	-0.06413	-0.1816	0.3039	0.4458	0.7342	0.8707	0.7532	0.670591	0.314844	0.083877	0.413893	0.212035
H3BQQ8	TRAPPC2L	-2.41	-2.714	-4.776	-2.174	-3.847	-5.126	0.3037	-2.366	0.2358	-1.437	-2.716	0.822121	0.073559	0.588387	0.121037	0.021217
Q86U86	PBRM1	-0.469	-0.771	-1.773	-0.7233	0.6244	-0.3455	0.302	-1.304	-0.2543	1.093	0.1235	0.748434	0.070322	0.800072	0.39991	0.857839
X6R4W8	ZNF207	1.023	0.7215	0.5704	1.087	0.8375	1.061	0.3016	-0.4527	0.06401	-0.1856	0.03747	0.311912	0.110766	0.795897	0.582273	0.893811
Q8WTT2	NOC3L	-0.2925	-0.5927	-0.0818	-0.834	-0.9941	-0.9199	0.3003	0.2107	-0.5416	-0.7016	-0.6275	0.434173	0.535406	0.09584	0.361165	0.120725
A0A494C0R9	LRBA	0.8894	0.5898	-1.596	-0.3677	-0.09773	1.813	0.2996	-2.486	-1.257	-0.9871	0.9233	0.72245	0.024999	0.187117	0.351069	0.31841
D6RIE3	COX7A2	0.6344	0.3352	0.8248	0.7357	0.8624	0.5745	0.2992	0.1905	0.1014	0.228	-0.0599	0.639808	0.463517	0.769758	0.41848	0.841853
A0A2R8Y804	CTNNB1	2.25	1.953	1.387	1.942	1.968	1.529	0.2974	-0.8628	-0.3085	-0.2822	-0.7207	0.310607	0.008723	0.544987	0.337687	0.022292
P30740	SERPINB1	-0.8856	-1.183	-0.4957	-1.508	-2.104	-0.4378	0.2974	0.3899	-0.6229	-1.218	0.4478	0.476662	0.39924	0.196324	0.069611	0.379381
Q8N4V1	MMGT1	-0.0673	-0.3642	-0.451	-1.114	-0.7195	-0.1226	0.2969	-0.3837	-1.046	-0.6522	-0.05531	0.227204	0.121415	0.07595	0.299503	0.832506
A0A075B6Q4	A0A075B6Q4	-0.8394	-1.136	-1.308	-2.593	-1.536	-1.878	0.2968	-0.4686	-1.754	-0.6966	-1.039	0.630147	0.055565	0.03499	0.007604	0.003054
P40227	CCT6A	5.616	5.32	5.242	5.328	5.555	5.559	0.2962	-0.3742	-0.2876	-0.06064	-0.05676	0.308124	0.08042	0.121713	0.734448	0.699434
Q8N1G4	LRRC47	2.602	2.307	2.789	2.749	2.589	2.811	0.2952	0.1869	0.1462	-0.01322	0.2087	0.361401	0.34848	0.506083	0.958046	0.364866
P60604	UBE2G2	-1.157	-1.451	-2.103	-1.165	-1.277	-2.962	0.2943	-0.9455	-0.007802	-0.1202	-1.805	0.715411	0.46119	0.974483	0.787291	0.260438
Q14974	KPNB1	4.317	4.023	3.884	4.424	4.349	4.338	0.2932	-0.433	0.1072	0.03249	0.0217	0.304062	0.230685	0.745783	0.882019	0.902736
D3YTB5	IRAK1	-1.756	-2.048	-0.09683	-3.345	-2.574	0.2299	0.292	1.659	-1.588	-0.8179	1.986	0.84743	0.18356	0.161138	0.533759	0.204252
H7C2V9	BCOR	-0.7972	-1.089	0.5066	-0.2359	-1.913	0.05362	0.2918	1.304	0.5614	-1.116	0.8509	0.729705	0.018255	0.658981	0.200149	0.012087
P63104	YWHAZ	4.71	4.418	5.211	4.62	5.083	4.963	0.2915	0.5009	-0.09	0.3734	0.2535	0.718842	0.008496	0.737156	0.155282	0.229175
Q16555	DPYSL2	4.447	4.156	4.621	4.446	4.272	4.405	0.2913	0.1735	-0.001076	-0.1757	-0.04204	0.379613	0.211339	0.994336	0.260871	0.738056
Q96IZ0	PAWR	-0.7786	-1.069	-0.5308	-0.6283	-0.7648	-1.204	0.2902	0.2478	0.1503	0.01382	-0.4254	0.43598	0.464247	0.628832	0.976721	0.556864
P98175	RBM10	1.45	1.161	1.578	1.345	1.344	1.431	0.2891	0.1281	-0.1049	-0.1055	-0.01869	0.450203	0.407311	0.712636	0.775256	0.952558
Q15814	TBCC	0.2475	-0.0404	-0.569	-1.145	-1.11	-0.6037	0.2879	-0.8164	-1.393	-1.357	-0.8511	0.602531	0.181177	0.089027	0.058559	0.163899
Q86UE4	MTDH	1.494	1.206	2.015	1.444	1.939	2.145	0.2878	0.5204	-0.04997	0.4444	0.6502	0.275685	0.00834	0.840574	0.044781	0.005658
B4DXZ6	FXR1	2.51	2.223	2.438	2.53	2.491	2.129	0.2866	-0.0716	0.02039	-0.01858	-0.3804	0.414952	0.510026	0.871578	0.93474	0.089859
P68402	PAFAH1B2	2.185	1.9	2.442	1	2.137	1.988	0.2855	0.2566	-1.185	-0.04777	-0.1968	0.702178	0.701146	0.13046	0.943812	0.780175
O76003	GLRX3	1.972	1.687	2.253	2.144	2.165	1.731	0.2852	0.2811	0.1712	0.1924	-0.2412	0.47157	0.305577	0.655139	0.468601	0.34567
Q1KMD3	HNRNPUL2	3.459	3.176	3.15	3.234	3.537	2.911	0.2835	-0.309	-0.2249	0.0777	-0.5483	0.402632	0.280334	0.499923	0.799183	0.148359
A0A024QZ42	PDCD6	0.9321	0.6492	0.7802	0.9944	-0.05318	1.022	0.2829	-0.1519	0.06225	-0.9853	0.08987	0.391578	0.726823	0.855529	0.073501	0.772617
A0A0A0MRN4	ZNF326	-6.907	-7.19	-3.292	-5.817	-7.004	-6.854	0.2829	3.614	1.089	-0.09743	0.05257	0.470409	0.023492	0.345661	0.767708	0.738201
Q6IAA8	LAMTOR1	-0.04885	-0.3316	-0.349	-1.971	-0.5863	-0.4001	0.2828	-0.3002	-1.922	-0.5375	-0.3513	0.307521	0.363989	0.231102	0.252447	0.176482
A0A494C1T6	A0A494C1T6	2.042	1.759	1.683	1.836	2.218	1.734	0.2826	-0.359	-0.2059	0.1761	-0.3076	0.386601	0.215773	0.535857	0.574939	0.262951
P20929	NEB	2.537	2.254	2.416	2.644	2.095	2.376	0.2824	-0.1203	0.1078	-0.4416	-0.1603	0.283616	0.686066	0.761931	0.27663	0.661138
P43246	MSH2	2.523	2.241	2.554	2.332	2.45	2.367	0.2821	0.0302	-0.1916	-0.07369	-0.156	0.182637	0.860134	0.366847	0.724785	0.414327
E9PPG9	RAE1	0.6369	0.3557	0.6659	-0.04743	-0.2553	0.3651	0.2812	0.02897	-0.6843	-0.8922	-0.2718	0.536054	0.883024	0.356965	0.105594	0.394638
Q9Y6C9	MTCH2	1.431	1.151	0.718	0.4842	1.312	0.7566	0.2806	-0.7133	-0.9471	-0.1196	-0.6747	0.332807	0.042335	0.028717	0.763095	0.027558
Q9Y371	SH3GLB1	1.485	1.204	1.977	0.4236	1.309	2.129	0.2803	0.4928	-1.061	-0.1751	0.6444	0.457505	0.093394	0.13003	0.512243	0.055724
A0A590UJ29	DLG1	0.2931	0.01321	-0.6237	-2.389	-1.382	-0.5782	0.2799	-0.9168	-2.682	-1.675	-0.8713	0.729266	0.317916	0.096266	0.125493	0.400409
D6R904	TPM3	5.869	5.589	5.506	5.505	5.785	5.853	0.2795	-0.3626	-0.3642	-0.08421	-0.01601	0.359763	0.171366	0.112641	0.71602	0.944353
Q15785	TOMM34	0.7186	0.4396	1.255	0.9439	0.9503	0.5717	0.279	0.5361	0.2253	0.2317	-0.1469	0.407289	0.115108	0.587991	0.517275	0.51827
R4GMQ1	KDM1A	-0.05607	-0.3341	-0.1428	0.1695	-0.6248	0.02291	0.278	-0.08674	0.2255	-0.5687	0.07897	0.556564	0.794542	0.334705	0.514913	0.790683
Q9BPW8	NIPSNAP1	0.7287	0.4508	1.061	1.116	0.9957	0.9848	0.2778	0.3323	0.3871	0.267	0.2561	0.59061	0.108404	0.340206	0.275987	0.316985
A0A087WT27	PGM3	0.3192	0.04194	0.3446	0.1828	0.5118	0.1348	0.2773	-0.4694	-0.6313	-0.3023	-0.6792	0.686332	0.468027	0.265281	0.650763	0.295362
F8WAQ6	ASCC2	-1.231	-1.508	-2.344	-4.932	-0.4347	-2.204	0.2769	-1.113	-3.701	0.7964	-0.9725	0.824492	0.324292	0.00634	0.406874	0.383291
B4DUR8	CCT3	6.167	5.892	6.057	6.101	6.043	6.105	0.2751	-0.1098	-0.06617	-0.1239	-0.06184	0.324459	0.260809	0.373937	0.316019	0.482402
P06576	ATP5F1B	7.109	6.834	7.068	7.042	7.101	6.975	0.2749	-0.0408	-0.06629	-0.007713	-0.1336	0.122426	0.816364	0.433342	0.951668	0.138622
A0A7I2V5M3	CTSL	-1.59	-1.864	-0.1167	0.1053	-1.002	-2.553	0.2737	1.474	1.696	0.588	-0.9624	0.651001	0.198588	0.122369	0.554886	0.1841
Q6GMV2	SMYD5	-3.683	-3.956	-4.194	-2.415	-3.521	-3.035	0.2737	-0.5117	1.268	0.1618	0.6473	0.848189	0.597783	0.10466	0.89252	0.36929
Q2NKX8	ERCC6L	-1.285	-1.559	-2.12	-1.268	-1.033	-2.907	0.2735	-0.8352	0.01735	0.2525	-1.621	0.696139	0.198552	0.97221	0.556522	0.002482
P07203	GPX1	1.522	1.249	2.72	3.163	2.013	2.101	0.273	1.198	1.641	0.4909	0.5782	0.574489	0.121755	0.178263	0.551747	0.298141
O15121	DEGS1	-2.497	-2.769	-3.318	-2.242	-2.605	-2.632	0.2729	-0.8216	0.2549	-0.1084	-0.1358	0.867808	0.729304	0.887438	0.953223	0.951893
Q9UI30	TRMT112	2.563	2.291	1.867	2.038	2.455	1.783	0.2722	-0.6958	-0.5244	-0.1081	-0.7795	0.196122	0.075067	0.025321	0.564376	0.001348
E7EMC6	ANXA6	3.428	3.157	3.424	3.583	2.721	3.369	0.2716	-0.004225	0.155	-0.7067	-0.05882	0.440699	0.973642	0.420799	0.004888	0.616146
O15173	PGRMC2	-0.7121	-0.9835	-0.2055	-0.2107	-0.6678	-0.8614	0.2715	0.5065	0.5013	0.04424	-0.1494	0.718451	0.531698	0.52918	0.953927	0.880745
E5RGS9	CHRAC1	-1.187	-1.458	-0.5444	-0.9786	-1.572	-1.146	0.2714	0.6423	0.208	-0.3857	0.04035	0.634079	0.022672	0.44375	0.43721	0.919518
C9JX88	PSMC2	3.983	3.714	3.613	3.849	3.318	3.57	0.269	-0.37	-0.1338	-0.6646	-0.4135	0.332345	0.147183	0.662391	0.022947	0.125252
Q9UIQ6	LNPEP	-0.8733	-1.142	-1.06	-0.7745	0.0172	0.1154	0.2687	-0.1865	0.0988	0.8905	0.9887	0.847563	0.884607	0.935756	0.437433	0.413917
Q5VT06	CEP350	0.337	0.06883	-0.8953	1.583	0.6531	1.349	0.2682	-1.232	1.245	0.3161	1.012	0.651536	0.000228	0.054376	0.67412	0.153009
A0A7I2V4K9	NONO	5.317	5.048	5.169	5.125	5.302	5.152	0.2681	-0.148	-0.192	-0.01454	-0.1646	0.257763	0.505396	0.47908	0.942834	0.395623
G3V0E5	TFRC	1.581	1.314	0.5906	1.339	1.287	1.367	0.2675	-0.9906	-0.2423	-0.2943	-0.2142	0.315117	0.006318	0.379046	0.289432	0.269687
P56192	MARS1	4.039	3.771	4.126	3.753	3.822	3.329	0.2674	0.087	-0.2853	-0.2164	-0.71	0.133655	0.854868	0.393723	0.391891	0.040782
Q07954	LRP1	3.189	2.922	3.808	3.617	2.864	3.146	0.2672	0.6189	0.4276	-0.3254	-0.04357	0.839733	0.415207	0.613841	0.614963	0.963877
Q7Z3T8	ZFYVE16	-1.355	-1.623	-1.112	-0.7639	-2.811	-1.448	0.2671	0.243	0.5916	-1.456	-0.09263	0.744085	0.820509	0.385692	0.071989	0.92085
Q7L2E3	DHX30	2.258	1.991	2.508	1.744	1.955	1.96	0.2668	0.2501	-0.5137	-0.3032	-0.2981	0.508776	0.452482	0.089513	0.280953	0.36116
C9JY79	SPTBN4	2.244	1.978	1.984	2.099	2.872	1.6	0.2668	-0.2605	-0.1457	0.6271	-0.6447	0.575471	0.720517	0.798073	0.25722	0.249326
A0A494C1L1	LBR	1.92	1.653	1.629	2.36	2.257	1.709	0.2664	-0.2908	0.44	0.3367	-0.2108	0.531284	0.195399	0.075297	0.177178	0.387167
D6R9P2	SLC9B2	-6.077	-6.344	-6.385	-5.049	-6.995	-6.574	0.2664	-0.3077	1.029	-0.9183	-0.4972	0.796096	0.732943	0.452903	0.295783	0.554186
P07948	LYN	-3.109	-3.375	-3.166	-3.276	-1.884	-4.446	0.2662	-0.05712	-0.1674	1.225	-1.337	0.880757	0.960195	0.895827	0.362372	0.281681
Q9UJX3	ANAPC7	-0.1445	-0.4103	0.06135	-0.9135	0.00147	-0.1934	0.2658	0.2059	-0.769	0.146	-0.04885	0.594197	0.120352	0.128611	0.750452	0.819694
O15031	PLXNB2	1.449	1.184	1.992	0.8193	1.344	0.7515	0.2658	0.543	-0.6302	-0.1057	-0.698	0.744177	0.333817	0.41906	0.908768	0.459865
Q9BV44	THUMPD3	-1.311	-1.576	-1.75	-0.9078	-0.8744	-1.305	0.2657	-0.4393	0.4028	0.4362	0.005604	0.595284	0.253004	0.510874	0.206619	0.988541
Q9H8Y8	GORASP2	1.86	1.595	1.578	-0.2542	1.033	1.411	0.2654	-0.282	-2.114	-0.8274	-0.4495	0.603584	0.525908	0.028795	0.294649	0.406128
Q92667	AKAP1	-2.048	-2.313	-1.29	1.474	-1.121	-2.009	0.2652	0.7585	3.522	0.9269	0.03923	0.821307	0.50545	0.023793	0.560723	0.973134
P46013	MKI67	2.192	1.928	1.993	1.564	2.605	2.002	0.2638	-0.1985	-0.6279	0.4133	-0.1901	0.608726	0.370937	0.116499	0.312319	0.407053
C9JG97	AAMP	-0.03638	-0.2999	-0.05829	-0.9342	-0.4433	-0.1469	0.2635	-0.02192	-0.8978	-0.4069	-0.1105	0.744747	0.977813	0.256479	0.657924	0.880201
Q9BRX2	PELO	-1.366	-1.629	-2.668	-2.737	-1.129	-3.119	0.263	-1.302	-1.371	0.2372	-1.753	0.676926	0.301631	0.073027	0.77932	0.003178
G3V1U3	METAP2	-6.043	-6.306	-4.593	-5.3	-5.066	-3.189	0.2629	1.45	0.7429	0.9769	2.853	0.836825	0.259654	0.491165	0.495879	0.056781
Q9H0H5	RACGAP1	-0.1336	-0.3956	-0.0675	-0.09071	0.5208	0.04572	0.262	0.06614	0.04293	0.6545	0.1794	0.769877	0.934629	0.957919	0.424592	0.819187
F5GY37	PHB2	4.091	3.83	4.418	4.134	4.344	3.886	0.2611	0.3274	0.0426	0.2533	-0.2052	0.586331	0.046978	0.87086	0.102384	0.293287
A0A1B0GUE9	DOCK7	-0.2984	-0.5594	0.05383	-0.6845	0.05303	-0.9537	0.261	0.3522	-0.3862	0.3514	-0.6553	0.572239	0.613226	0.631621	0.604306	0.201452
Q6KB66	KRT80	-3.299	-3.56	-5.627	-5.569	-3.298	-1.918	0.261	-2.328	-2.271	0.000374	1.381	0.670101	0.011019	0.035392	0.999729	0.024326
F8VWK2	TRAFD1	-2.379	-2.64	-3.315	-3.169	-3.2	-3.418	0.2609	-0.2193	-0.7902	-0.1045	-1.039	0.682471	0.734505	0.47403	0.845752	0.113096
E7EQG2	EIF4A2	-3.537	-3.798	-1.267	-3.94	-2.997	-2.417	0.2607	2.27	-0.4033	0.5399	1.12	0.856682	0.004734	0.833262	0.333952	0.528796
O15111	CHUK	-1.086	-1.347	-2.219	-3.051	-1.504	-1.901	0.2601	-1.133	-1.965	-0.4176	-0.8143	0.821337	0.414	0.227444	0.721373	0.541647
E9PKQ9	BRD2	-6.833	-7.093	-5.661	-1.671	-6.854	-6.374	0.2595	1.172	5.162	-0.02062	0.4593	0.520945	0.08793	0.008452	0.832013	0.247763
F8VUX3	CORO1C	0.8911	0.6335	0.4258	0.8231	0.8012	0.8077	0.2577	-0.4653	-0.06798	-0.08993	-0.08344	0.04733	0.076736	0.769565	0.551023	0.776319
A0A7I2V2K2	HGS	0.3152	0.05794	-0.1757	0.3006	0.1386	-0.1004	0.2573	-0.4909	-0.01466	-0.1766	-0.4156	0.804379	0.12922	0.955488	0.755839	0.525755
P31939	ATIC	3.972	3.717	3.868	4.032	3.702	4.241	0.2549	-0.1045	0.05971	-0.2704	0.2682	0.109132	0.498653	0.801256	0.153066	0.125367
F5H6X6	GANAB	5.123	4.868	4.66	4.859	4.83	4.699	0.2542	-0.4628	-0.264	-0.293	-0.4237	0.084632	0.007422	0.212376	0.065682	0.015373
P62736	ACTA2	4.524	4.27	4.904	5.158	5.056	4.529	0.2541	0.3799	0.6341	0.5317	0.004779	0.77487	0.488079	0.1302	0.138271	0.98823
P15954	COX7C	1.163	0.9097	-0.07132	1.216	0.911	1.865	0.2534	-1.234	0.05246	-0.2521	0.7015	0.710561	0.20741	0.838381	0.359537	0.030638
Q9UKE5	TNIK	-0.2344	-0.4872	0.1106	2.203	-0.8272	-1.917	0.2528	0.3449	2.438	-0.5928	-1.682	0.849899	0.655466	0.050623	0.429435	0.127565
A0A286YFC8	PHGDH	3.707	3.455	3.057	3.645	3.79	3.506	0.2525	-0.6505	-0.06182	0.0825	-0.2009	0.590446	0.19235	0.896786	0.844608	0.634907
A0A0U1RQM0	A0A0U1RQM0	-3.353	-3.603	-2.186	-2.793	-3.91	-2.517	0.25	1.167	0.5604	-0.5573	0.8364	0.871739	0.305847	0.705298	0.731843	0.531622
P30084	ECHS1	2.762	2.513	2.663	2.473	2.637	2.392	0.2498	-0.09923	-0.2895	-0.1252	-0.3706	0.250814	0.753653	0.215337	0.59886	0.263189
P22033	MMUT	1.988	1.738	1.539	1.178	1.92	1.42	0.2494	-0.4489	-0.8095	-0.06801	-0.568	0.793616	0.576493	0.358996	0.944344	0.488342
Q9H2M9	RAB3GAP2	-0.5095	-0.7579	-1.766	-1.771	0.5852	1.224	0.2484	-1.256	-1.261	1.095	1.733	0.820323	0.180675	0.290352	0.41737	0.147216
Q969V3	NCLN	1.137	0.89	1.304	0.1392	0.8024	0.4754	0.2473	0.1664	-0.9981	-0.3349	-0.6619	0.405294	0.512823	0.02025	0.540548	0.107666
Q9BQ70	TCF25	-3.132	-3.378	-1.594	-2.672	-3.576	-3.006	0.247	1.537	0.4598	-0.4445	0.1252	0.879087	0.202994	0.715291	0.683594	0.910574
E9PKF6	PPP6R3	0.7533	0.5065	1.034	0.7025	0.8371	0.4999	0.2469	0.2806	-0.05081	0.08375	-0.2535	0.514889	0.418826	0.857806	0.775093	0.31804
Q2TAA2	IAH1	-1.711	-1.957	-1.566	-0.8184	-5.702	-2.667	0.2464	0.1441	0.8921	-3.991	-0.9559	0.767206	0.811832	0.163536	0.000695	0.259512
G5E9R0	ACTB	4.353	4.109	1.157	2.401	2.68	3.827	0.244	-3.196	-1.952	-1.673	-0.5264	0.954521	0.244703	0.537287	0.580684	0.848563
P43487	RANBP1	2.808	2.566	3.06	3.077	2.909	2.826	0.2423	0.2517	0.2689	0.1013	0.01832	0.65768	0.510741	0.342676	0.707138	0.949641
A8MTF7	RBM33	-5.235	-5.477	-6.818	-5.954	-5.495	-5.513	0.2416	-1.583	-0.7184	-0.2596	-0.2775	0.849665	0.087552	0.538877	0.862652	0.84759
Q8WUZ0	BCL7C	-2.779	-3.02	-1.368	-1.964	-2.318	-1.166	0.2411	1.411	0.8153	0.4615	1.613	0.889967	0.318045	0.655005	0.757431	0.306306
O43663	PRC1	-1.179	-1.419	-0.9459	-1.755	-3.288	-0.8361	0.2404	0.2326	-0.5769	-2.11	0.3424	0.711479	0.707821	0.221101	0.16526	0.660061
P52907	CAPZA1	3.536	3.296	3.59	3.98	3.904	3.574	0.2401	0.0545	0.4439	0.3682	0.03774	0.661914	0.757082	0.038849	0.029669	0.726043
Q9BUP0	EFHD1	-3.417	-3.657	-5.897	-4.364	-2.76	-4.375	0.24	-2.48	-0.9462	0.6576	-0.9579	0.858679	0.056109	0.541237	0.72839	0.636436
E9PG40	APP	-1.612	-1.852	-1.464	-0.4185	-2.211	-2.572	0.2396	0.1478	1.194	-0.5986	-0.9598	0.892058	0.856057	0.380674	0.567799	0.588568
E9PKT9	MOCS2	-2.788	-3.027	-1.72	-4.205	-3.078	-1.574	0.2389	1.068	-1.417	-0.2893	1.214	0.826085	0.305671	0.228681	0.84113	0.22017
P61758	VBP1	1.454	1.216	1.067	0.0927	1.345	0.5624	0.2386	-0.3872	-1.361	-0.1093	-0.8918	0.078866	0.082554	0.088372	0.407431	0.005288
G3V3I1	PSMA6	3.864	3.625	3.453	3.881	3.702	4.061	0.2385	-0.4108	0.0175	-0.1621	0.1974	0.437356	0.095875	0.948151	0.584099	0.350021
P09001	MRPL3	1.352	1.115	0.3688	1.007	0.4739	1.251	0.2375	-0.9836	-0.3451	-0.8785	-0.1011	0.497484	0.067147	0.388737	0.231712	0.679585
A0A087WUN5	ANAPC16	-3.889	-4.126	-6.118	-5.324	-4.722	-3.398	0.2373	-2.229	-1.435	-0.833	0.4915	0.733177	0.020465	0.21056	0.224573	0.621702
Q6NXT2	H3-5	5.274	5.037	3.945	3.747	4.848	5.362	0.2371	-1.329	-1.527	-0.4265	0.08744	0.822228	0.079352	0.312232	0.526093	0.820579
Q9Y3P9	RABGAP1	0.5447	0.3076	1.335	0.2794	0.4311	0.7048	0.2371	0.7903	-0.2653	-0.1136	0.1601	0.507965	0.223669	0.565074	0.782907	0.814067
O75663	TIPRL	0.8119	0.5754	1.301	0.369	0.6478	0.4621	0.2365	0.4894	-0.4429	-0.1641	-0.3498	0.635494	0.395266	0.417046	0.736507	0.57435
Q86VN1	VPS36	-0.6001	-0.8362	-1.109	-1.131	-1.661	-1.759	0.2362	-0.5086	-0.5305	-1.061	-1.159	0.743163	0.324602	0.41999	0.190072	0.083148
Q15404	RSU1	-2.023	-2.259	-2.826	-4.656	-3.529	-1.491	0.2356	-0.803	-2.633	-1.506	0.5323	0.898321	0.558756	0.046807	0.094604	0.669064
Q5STZ8	ABCF1	3.412	3.177	2.741	2.888	3.002	2.995	0.2345	-0.6709	-0.5242	-0.41	-0.4164	0.642869	0.02969	0.058648	0.347657	0.232231
A0A590UJT3	TERF2IP	-1.271	-1.505	-1.497	-0.6888	-1.696	-1.589	0.2341	-0.2254	0.5823	-0.4246	-0.3182	0.36537	0.256877	0.096393	0.526179	0.283246
Q9Y2U8	LEMD3	0.1394	-0.09431	-0.1646	-0.9114	-0.6256	-0.02969	0.2337	-0.304	-1.051	-0.765	-0.169	0.786192	0.499875	0.058276	0.184131	0.647298
F8WE18	BCL7B	-6.482	-6.715	-5.725	-6.811	-6.865	-6.348	0.2329	0.7565	-0.3294	-0.3829	0.1336	0.735108	0.463613	0.429716	0.366151	0.81459
Q96IU4	ABHD14B	-1.257	-1.49	-0.3712	-2.657	-0.7917	-1.628	0.2328	0.8855	-1.4	0.465	-0.3711	0.753239	0.174012	0.158079	0.338186	0.499629
E9PQA6	MVB12A	4.432	4.199	4.554	4.509	4.409	4.523	0.2326	0.1222	0.07699	-0.02328	0.09084	0.771447	0.716772	0.843507	0.946434	0.861272
A0A494C179	CHD1L	-0.9904	-1.223	-3.721	-3.328	-2.105	-3.84	0.2323	-2.731	-2.338	-1.114	-2.849	0.893885	0.15954	0.048834	0.360271	0.047435
A0A087WTA5	EIF2B4	-1.09	-1.322	-3.987	-3.049	-2.223	-5.563	0.2323	1.199	-1.96	-1.133	-0.3767	0.940971	0.331516	0.276518	0.363745	0.693031
A0A6Q8PFA7	AIFM1	3.646	3.414	2.781	3.199	3.266	3.345	0.232	-0.8651	-0.447	-0.3797	-0.3009	0.353935	0.002709	0.015732	0.055348	0.172387
A0A1B0GV23	CTSD	-6.93	-7.162	-6.406	-5.642	-6.87	-4.545	0.2319	0.5234	1.288	0.06009	2.385	0.594742	0.587905	0.188882	0.733038	0.078286
B1AUU8	EPS15	-0.02341	-0.2554	-0.1587	0.7661	-0.3294	-0.2113	0.2319	-0.1353	0.7895	-0.306	-0.1879	0.754891	0.77137	0.238477	0.712982	0.728382
P68032	ACTC1	4.538	4.307	4.948	5.198	5.084	4.595	0.231	0.4095	0.6601	0.5464	0.0572	0.796114	0.448908	0.119038	0.130377	0.864044
Q969S9	GFM2	-2.031	-2.262	-1.546	-0.9224	-1.507	-0.4131	0.231	0.4849	1.109	0.5241	1.618	0.605807	0.175379	0.004138	0.39686	0.145572
Q5TDH0	DDI2	-0.1981	-0.4279	0.1574	-0.3191	-0.7054	-0.2433	0.2299	0.3555	-0.121	-0.5073	-0.04525	0.741512	0.337468	0.697761	0.642365	0.879011
Q15054	POLD3	-0.8101	-1.04	-2.937	-2.028	-2.985	-1.386	0.2295	-2.127	-1.218	-2.175	-0.5761	0.613236	0.151693	0.233649	0.046681	0.428498
E9PKE3	HSPA8	7.684	7.455	6.863	7.781	7.727	7.684	0.2294	-0.8217	0.09692	0.04293	-3.94e-05	0.362724	0.003355	0.458714	0.774404	0.999568
D6RGI3	SEPTIN11	2.593	2.367	2.838	3.046	2.849	2.348	0.2267	0.2447	0.453	0.2557	-0.2454	0.65713	0.279206	0.082172	0.565513	0.180788
Q9NSS8	SNRNP40	0.8146	0.5879	1.085	1.007	0.379	1.652	0.2267	0.2708	0.1923	-0.4356	0.8376	0.809316	0.349634	0.792296	0.426714	0.220473
A0A2R8YDH4	A0A2R8YDH4	0.6116	0.3857	0.9534	1.091	-0.2679	0.9289	0.2259	0.3418	0.4796	-0.8795	0.3172	0.714494	0.256386	0.163686	0.317472	0.28298
O15381	NVL	0.2543	0.02893	0.7104	-0.114	-0.00795	1.077	0.2254	0.4561	-0.3683	-0.2623	0.8229	0.735828	0.48344	0.233909	0.752359	0.140026
M0R375	SAE1	0.5372	0.3121	-0.2998	-0.078	-1.206	0.2579	0.2251	-0.837	-0.6152	-1.744	-0.2793	0.763252	0.2227	0.434572	0.234669	0.643773
P52888	THOP1	2.237	2.013	1.748	1.591	1.871	1.781	0.2239	-0.4886	-0.6457	-0.3658	-0.4556	0.597653	0.067005	0.042983	0.125197	0.087804
O00231	PSMD11	4.044	3.821	3.562	4.175	4.318	3.72	0.2231	-0.4818	0.1304	0.274	-0.3241	0.734859	0.185096	0.752806	0.619884	0.368899
Q9H223	EHD4	1.891	1.668	0.7703	0.6425	1.41	0.8302	0.2224	-1.12	-1.248	-0.4809	-1.06	0.793867	0.200448	0.14588	0.538259	0.211346
K7ENL7	VASP	-1.828	-2.051	-2.242	-3.306	-1.85	-1.968	0.2224	-0.414	-1.478	-0.02147	-0.1394	0.830876	0.36477	0.032574	0.974594	0.819578
P46108	CRK	1.432	1.21	0.6471	1.419	1.415	1.141	0.2222	-0.7846	-0.01257	-0.01628	-0.2905	0.546847	0.113141	0.970588	0.96635	0.523847
Q5TFE4	NT5DC1	1.032	0.8116	1.952	1.484	0.9489	1.169	0.2203	0.92	0.4521	-0.08304	0.1369	0.813803	0.050093	0.392815	0.845998	0.690633
Q96G23	CERS2	-0.5251	-0.7444	-0.7786	-1.168	-0.2327	-0.9622	0.2193	-0.2535	-0.6431	0.2924	-0.4371	0.847856	0.611159	0.501017	0.663157	0.455932
Q96HN2	AHCYL2	-3.877	-4.094	-3.166	-3.289	-3.889	-3.56	0.2175	0.7109	0.5876	-0.01193	0.3163	0.894605	0.469455	0.629258	0.992135	0.730072
F5GXJ9	ALCAM	-1.09	-1.308	-1.77	-0.4793	-0.4766	-1.059	0.2174	-0.6797	0.6109	0.6136	0.03087	0.713995	0.163904	0.17385	0.55367	0.949258
P07919	UQCRH	-0.4705	-0.6878	0.3389	0.8716	0.4519	-1.232	0.2173	0.8094	1.342	0.9224	-0.7612	0.886093	0.337219	0.168775	0.378137	0.356212
P20073	ANXA7	2.007	1.79	1.211	1.595	1.895	1.006	0.2167	-0.7965	-0.4124	-0.1119	-1.001	0.484727	0.006486	0.170904	0.813902	0.003712
B7ZB78	RAP1B	-6.904	-7.121	-0.4834	-2.46	-6.836	-2.674	0.2165	6.421	4.445	0.06819	4.23	0.575493	0.01911	0.037604	0.432248	0.02944
Q9BXV9	GON7	-2.865	-3.081	-3.74	-5.507	-4.83	-4.125	0.2158	-0.8745	-2.641	-1.964	-1.26	0.856218	0.506809	0.100792	0.165548	0.439309
P09417	QDPR	-3.644	-3.859	-1.82	-2.722	-3.213	-2.919	0.2149	1.824	0.9223	0.4313	0.7248	0.89587	0.118259	0.388601	0.694582	0.478827
O15212	PFDN6	2.001	1.786	1.934	1.01	2.118	1.893	0.2147	-0.0674	-0.9916	0.117	-0.1082	0.500027	0.726437	0.120198	0.563645	0.500749
M0R116	ATP1A3	-4.85	-5.065	-5.295	-6.569	-5.635	-6.318	0.2143	-0.4446	-1.718	-0.7845	-1.467	0.847132	0.627832	0.064117	0.373437	0.078695
O43318	MAP3K7	-1.567	-1.781	-2.536	-1.799	-3.145	-4.115	0.2142	-0.9692	-0.2324	-1.578	-2.548	0.858503	0.53265	0.896652	0.390943	0.091127
Q9P270	SLAIN2	-2.156	-2.369	-4.862	-2.411	-2.681	-3.637	0.2131	-2.707	-0.2555	-0.5255	-1.482	0.905413	0.079678	0.840566	0.561343	0.263956
D6R9I9	ABCE1	2.33	2.118	1.713	1.917	2.122	1.717	0.2124	-0.6169	-0.4132	-0.2085	-0.6135	0.265903	0.005386	0.01957	0.15291	0.026837
Q7Z4W1	DCXR	1.392	1.18	0.3549	1.342	1.572	1.46	0.2123	-1.037	-0.04994	0.1799	0.06803	0.621079	0.079108	0.912823	0.672197	0.865135
Q99536	VAT1	3.119	2.907	3.053	2.979	3.014	2.861	0.2122	-0.06601	-0.1401	-0.1056	-0.2579	0.278773	0.728102	0.549317	0.551932	0.110239
P11172	UMPS	1.026	0.8143	-4.694	-3.036	1.076	1.07	0.2121	-1.98	-0.3229	0.04959	0.04412	0.486857	0.215458	0.822038	0.849954	0.844269
P50991	CCT4	5.802	5.591	5.523	5.663	5.624	5.867	0.2116	-0.2793	-0.1395	-0.1789	0.06409	0.392216	0.307518	0.532555	0.343368	0.721686
P16152	CBR1	4.024	3.813	3.991	4.313	4.148	4.3	0.2111	-0.03315	0.2887	0.1239	0.2752	0.58168	0.727336	0.01396	0.393679	0.059948
Q9Y6H1	CHCHD2	1.213	1.004	1.709	1.488	1.555	1.231	0.2089	0.4959	0.2752	0.3418	0.01782	0.788894	0.310305	0.6057	0.54619	0.971338
P52272	HNRNPM	6.747	6.539	6.482	6.553	6.473	6.661	0.2073	-0.265	-0.1941	-0.2733	-0.08604	0.404201	0.158365	0.310487	0.140612	0.516404
O43678	NDUFA2	1.167	0.9599	1.106	1.76	1.085	0.7307	0.2069	-0.06044	0.5933	-0.08196	-0.4362	0.763263	0.895288	0.189843	0.883465	0.298337
P50502	ST13	3.742	3.537	4.585	4.262	4.01	3.974	0.2054	0.6853	0.5201	0.2674	0.2322	0.424523	0.014707	0.149725	0.208729	0.27026
E9PC62	CELF2	-0.9632	-1.168	-3.629	-1.879	0.07934	-5.456	0.2051	-2.666	-0.9157	1.043	-4.493	0.743112	0.026044	0.37938	0.075516	0.004688
Q96GX2	ATXN7L3B	-3.189	-3.394	-1.481	-4.4	-4.112	-5.573	0.205	1.709	-1.211	-0.923	-2.384	0.877973	0.082085	0.222673	0.470004	0.034791
E9PN04	DPF2	-0.06661	-0.2717	1.177	-0.8288	-1.372	1.016	0.205	1.243	-0.7622	-1.305	1.083	0.834978	0.090038	0.660171	0.221235	0.128096
Q8N766	EMC1	2.426	2.221	0.7697	1.209	0.6655	2.23	0.2048	-1.656	-1.217	-1.76	-0.1956	0.889571	0.001218	0.087145	0.000856	0.781433
Q5F2F8	PPP3CB	-5.749	-5.953	-2.271	-5.402	-6.882	-1.509	0.2041	3.478	0.3463	-1.134	4.239	0.917252	0.084691	0.82404	0.445665	0.026401
Q5JTJ3	COA6	0.4116	0.2076	-0.1372	0.2352	0.7556	0.4597	0.204	-0.5488	-0.1763	0.3441	0.04814	0.379121	0.092296	0.646056	0.133381	0.764966
A0A0J9YX88	PHRF1	0.03575	-0.1681	-0.766	-3.479	-0.5138	-0.3224	0.2039	-0.8017	-3.515	-0.5495	-0.3581	0.841654	0.089477	0.008202	0.371435	0.530121
P29372	MPG	-1.018	-1.221	0.6197	-0.6697	-1.318	0.3162	0.2038	1.637	0.348	-0.2999	1.334	0.823113	0.124852	0.737882	0.671573	0.12495
E9PM14	NDUFC2	-2.567	-2.77	-1.449	-5.546	-1.815	-1.695	0.2033	1.118	-2.979	0.7522	0.8716	0.882649	0.240429	0.005716	0.459716	0.439141
P46781	RPS9	3.46	3.257	3.488	3.478	3.682	3.238	0.2031	0.02736	0.01763	0.2222	-0.2224	0.684292	0.836105	0.891612	0.253385	0.275759
E2QRB9	TXNRD1	-6.758	-6.96	-6.799	-7.207	-6.755	-4.694	0.2028	-0.04175	-0.4491	0.002832	2.064	0.70495	0.860833	0.348239	0.990393	0.090791
A0A1W2PS70	SCARB2	-1.487	-1.69	-1.625	-1.807	-0.8525	-1.755	0.2024	-0.1379	-0.3195	0.6349	-0.2673	0.790018	0.835553	0.82891	0.358286	0.631466
P00558	PGK1	6.685	6.483	6.421	6.415	6.519	6.644	0.2017	-0.264	-0.2703	-0.1654	-0.04058	0.212339	0.246056	0.112453	0.23216	0.74832
Q9Y224	RTRAF	1.481	1.279	1.844	1.451	0.893	1.812	0.2017	0.3635	-0.02964	-0.5876	0.3315	0.709825	0.292249	0.914167	0.423001	0.264042
Q969H8	MYDGF	2.862	2.66	2.28	2.569	2.683	2.145	0.2015	-0.582	-0.2932	-0.1786	-0.7171	0.360477	0.017638	0.330509	0.4967	0.045246
H7BXF6	PNPT1	-1.08	-1.28	-1.215	-1.35	-1.128	-1.461	0.2003	-0.1345	-0.2701	-0.04814	-0.3811	0.763572	0.812665	0.494934	0.90299	0.502204
P26885	FKBP2	-0.6675	-0.8668	0.7194	-1.151	-0.2894	0.4947	0.1994	1.387	-0.4834	0.3781	1.162	0.87685	0.05398	0.767919	0.641545	0.113412
Q92575	UBXN4	-1.216	-1.415	-3.017	-1.608	-3.029	-0.857	0.199	-1.8	-0.3916	-1.812	0.3594	0.866911	0.083322	0.761587	0.143661	0.269988
Q92621	NUP205	1.132	0.9341	1.934	1.403	1.391	0.8258	0.1981	0.8014	0.2712	0.2587	-0.3064	0.655387	0.149091	0.663275	0.693826	0.762137
Q7Z7K6	CENPV	0.8567	0.6587	1.059	0.6132	0.773	0.9582	0.198	0.2018	-0.2435	-0.08377	0.1015	0.276945	0.381153	0.168051	0.741193	0.612163
F5GXR3	PTMS	-7.082	-7.28	-3.195	-6.116	-4.943	-6.802	0.1975	3.887	0.9657	2.14	0.2805	0.794319	0.007538	0.152658	0.094925	0.611675
Q9BRJ6	C7orf50	0.89	0.6932	0.7537	0.9092	0.08478	1.522	0.1967	-0.1362	0.01917	-0.8052	0.6315	0.664101	0.758797	0.940132	0.461271	0.041269
Q9P287	BCCIP	-0.1082	-0.3042	0.5804	0.2876	-1.286	-0.06896	0.196	0.6886	0.3958	-1.178	0.03925	0.673538	0.028253	0.130739	0.460604	0.817214
J3QRU4	VAMP2	1.061	0.865	1.26	1.178	0.8638	0.7967	0.196	0.1991	0.1173	-0.1972	-0.2643	0.490057	0.442958	0.339776	0.755541	0.30594
Q5T447	HECTD3	-0.2665	-0.4619	0.0002394	-0.6094	-2.307	-0.2239	0.1954	0.2668	-0.3428	-2.04	0.04267	0.752165	0.614618	0.759831	0.07775	0.939736
P61201	COPS2	1.017	0.8225	1.122	0.9746	0.8656	0.9578	0.1948	0.1045	-0.0427	-0.1517	-0.05956	0.661144	0.752735	0.921129	0.696359	0.890454
A0A7I2V4B5	GMPPB	-0.1769	-0.3715	-0.1963	-1.173	-0.1029	0.1049	0.1946	-0.01939	-0.9963	0.07401	0.2818	0.682488	0.962097	0.180924	0.881377	0.654628
P47755	CAPZA2	2.617	2.423	2.389	2.283	2.805	2.705	0.1945	-0.2282	-0.3342	0.1883	0.08789	0.459576	0.549168	0.335518	0.5503	0.794571
O75477	ERLIN1	-2.631	-2.824	-3.11	-2.781	-2.893	-3.27	0.1937	-0.4796	-0.1503	-0.2626	-0.6391	0.873136	0.484424	0.89049	0.826419	0.562611
Q9BW85	YJU2	-0.2385	-0.4322	-0.6588	-1.223	-2.064	-0.7144	0.1937	-0.4202	-0.9847	-1.825	-0.4758	0.620512	0.066781	0.21188	0.134084	0.237053
H0YMG7	ALDH1A2	-0.4964	-0.6894	0.04587	-0.07762	-0.6156	0.1586	0.193	0.5423	0.4188	-0.1192	0.655	0.452027	0.409841	0.523704	0.830123	0.168969
Q9NZW5	PALS2	-1.456	-1.649	1.087	-2.299	-1.061	-2.506	0.1925	2.544	-0.843	0.3952	-1.05	0.837285	0.006393	0.522387	0.794552	0.409549
P68036	UBE2L3	1.291	1.099	1.247	2.202	1.675	1.68	0.1922	-0.04416	0.9111	0.384	0.3887	0.59995	0.854873	0.174683	0.380792	0.041801
P10606	COX5B	2.615	2.424	1.823	2.365	2.659	2.608	0.1916	-0.7924	-0.2503	0.04368	-0.007294	0.702198	0.078212	0.530246	0.905962	0.978672
A0A286YEY6	ANAPC10	-3.557	-3.746	-5.905	-4.689	-3.984	-3.475	0.1895	-2.348	-1.133	-0.4273	0.08147	0.924241	0.094724	0.396121	0.736926	0.948496
K7EIR0	WDR18	-0.7115	-0.9007	-0.4579	-1.602	-1.993	-0.955	0.1892	0.2535	-0.8908	-1.282	-0.2435	0.681783	0.454356	0.120652	0.050875	0.681306
A0A087WY55	VTA1	1.534	1.345	1.189	1.668	1.502	1.471	0.189	-0.345	0.1343	-0.03128	-0.06232	0.78077	0.391293	0.724538	0.954535	0.878848
A0A2R8Y653	UCK2	-1.922	-2.111	-1.511	-1.817	-2.4	-2.162	0.1889	0.4102	0.1043	-0.4787	-0.2407	0.822021	0.378292	0.710329	0.151734	0.698029
M0QXM4	SLC1A5	-1.361	-1.549	-4.18	-3.183	-2.412	-2.197	0.188	-2.818	-1.821	-1.051	-0.8358	0.931775	0.182396	0.434217	0.589103	0.633322
Q9Y2P8	RCL1	-2.463	-2.65	-5.093	-0.783	-2.802	-2.282	0.1875	-2.631	1.68	-0.3393	0.1806	0.890673	0.149305	0.043865	0.798468	0.802732
F8WEQ7	PDCD6IP	1.061	0.8742	0.7517	1.073	1.124	1.093	0.187	-0.3095	0.01143	0.06293	0.03139	0.396008	0.323745	0.950064	0.796288	0.852444
P82094	TMF1	-0.7869	-0.973	-1.173	-4.049	0.1676	-0.889	0.1861	-0.3866	-3.262	0.9545	-0.1021	0.928656	0.602893	0.00234	0.178177	0.911024
P25786	PSMA1	3.455	3.27	3.388	3.327	3.279	3.546	0.1857	-0.06776	-0.1282	-0.1764	0.09099	0.654431	0.577458	0.667417	0.451173	0.772218
A0A0D9SG62	MAP4K4	-2.458	-2.643	-3.227	-3.142	-3.176	-1.992	0.1847	-0.7688	-0.684	-0.7178	0.4665	0.896715	0.345261	0.657954	0.617459	0.565131
A0A087WZZ9	CDK1	2.972	2.788	2.844	3.436	3.425	2.839	0.1842	-0.128	0.1413	0.131	-0.1326	0.53999	0.582024	0.542929	0.529708	0.615943
P40429	RPL13A	3.683	3.499	2.945	3.411	3.114	3.394	0.1842	-0.7379	-0.272	-0.569	-0.2892	0.721283	0.00893	0.293038	0.071852	0.18423
J3KT51	JPT1	3.239	3.057	2.692	3.075	3.109	3.269	0.1826	-0.547	-0.1645	-0.1308	0.02946	0.284303	0.200584	0.42978	0.496218	0.892129
P49903	SEPHS1	2.218	2.037	2.079	1.845	2.166	2.153	0.181	-0.1389	-0.3728	-0.0515	-0.06515	0.546061	0.746672	0.133317	0.821266	0.915179
Q13557	CAMK2D	-1.64	-1.82	-2.039	-1.554	-0.3607	-0.3117	0.18	-0.3988	0.08616	1.28	1.329	0.661639	0.202931	0.887464	0.053834	0.056204
Q56UQ5	Q56UQ5	-5.916	-6.094	-6.814	-6.063	-5.895	-6.136	0.1787	-0.8984	-0.1471	0.02081	-0.2208	0.90875	0.409944	0.919221	0.985974	0.878443
P36542	ATP5F1C	2.067	1.889	2.223	2.199	2.083	1.573	0.1783	0.1564	0.1318	0.01605	-0.4944	0.496942	0.564668	0.612455	0.969855	0.13437
Q2VIR3	EIF2S3B	3.801	3.622	3.506	3.64	3.508	3.438	0.1783	-0.2949	-0.1603	-0.2926	-0.3627	0.570867	0.050381	0.303142	0.265401	0.077577
A0A7I2V482	MTHFD2	0.2505	0.07221	0.5019	0.9929	0.2046	0.1213	0.1783	0.2514	0.7423	-0.04593	-0.1292	0.713231	0.509819	0.056171	0.936673	0.78981
P45880	VDAC2	4.848	4.67	4.969	4.838	4.859	4.945	0.178	0.1211	-0.009806	0.01123	0.09674	0.343552	0.403164	0.947728	0.944049	0.498356
Q96SB4	SRPK1	0.2791	0.1013	-0.04011	-0.4656	-0.7053	-0.6959	0.1778	-0.3192	-0.7447	-0.9844	-0.975	0.631198	0.267426	0.161177	0.046937	0.011159
A0A2R8YEY8	A0A2R8YEY8	-4.885	-5.062	-5.291	-6.566	-5.646	-6.323	0.1772	-0.4062	-1.682	-0.7614	-1.438	0.874677	0.663591	0.074413	0.39973	0.092502
P49448	GLUD2	2.858	2.681	2.681	3.01	2.7	2.55	0.1771	-0.1762	0.1519	-0.1574	-0.3073	0.328518	0.263487	0.356822	0.333194	0.064025
O00151	PDLIM1	3.975	3.798	3.565	4.105	4.326	4.258	0.177	-0.4092	0.1306	0.3519	0.2836	0.680782	0.098289	0.570813	0.256689	0.244442
D6RCC8	PPAT	0.112	-0.06474	-0.09719	-0.434	-1.57	0.1713	0.1767	-0.2092	-0.546	-1.682	0.05934	0.730921	0.275722	0.196811	0.306874	0.722384
Q6P1L8	MRPL14	-0.8314	-1.007	-1.036	-0.7491	-0.7611	-0.5235	0.1756	-0.2044	0.08227	0.07029	0.308	0.775531	0.700782	0.936788	0.921078	0.532762
Q9Y3D9	MRPS23	0.9449	0.7701	0.8147	1.336	0.9874	0.8159	0.1748	-0.1301	0.3911	0.0425	-0.129	0.384312	0.618033	0.227173	0.910823	0.516426
P00367	GLUD1	4.478	4.304	4.039	4.111	4.21	3.651	0.1745	-0.4393	-0.3678	-0.2685	-0.827	0.477265	0.044706	0.093632	0.301956	0.002532
O95678	KRT75	-6.067	-6.242	-6.4	-5.484	-5.329	-6.445	0.1744	-0.3321	0.5836	0.7389	-0.3774	0.892599	0.657899	0.46199	0.492598	0.596156
E7EVI1	STAU2	-2.731	-2.905	-2.108	-3.269	-2.656	-3.91	0.1743	0.6225	-0.5384	0.07436	-1.179	0.639019	0.109654	0.45194	0.950112	0.414238
Q13601	KRR1	-1.743	-1.916	-1.813	-1.345	-1.781	-1.726	0.1738	-0.07045	0.3972	-0.03893	0.01622	0.82102	0.887897	0.59994	0.976723	0.967877
P48634	PRRC2A	2.86	2.686	2.605	3.057	2.399	2.632	0.1737	-0.2544	0.1967	-0.4605	-0.228	0.612622	0.138886	0.255586	0.045319	0.130896
Q9NVQ4	FAIM	-1.061	-1.232	-2.119	-4.652	-1.681	-1.817	0.1715	-1.058	-3.591	-0.6196	-0.7558	0.856616	0.052009	0.015323	0.317632	0.325525
Q04941	PLP2	-2.883	-3.054	-2.012	-1.922	-3.282	-2.955	0.1709	0.8712	0.9607	-0.3991	-0.07215	0.886878	0.231589	0.124831	0.702213	0.908673
E9PK47	PYGL	1.108	0.9388	1.665	1.572	1.319	1.298	0.1697	0.5567	0.4632	0.2155	0.1951	0.629153	0.173152	0.008559	0.506467	0.503743
A0A1B0GU03	A0A1B0GU03	2.935	2.765	2.632	2.413	2.548	2.055	0.1695	-0.3031	-0.5219	-0.3869	-0.8802	0.364161	0.088603	0.014581	0.077526	0.032832
A0A1B0GU92	A0A1B0GU92	2.935	2.765	2.632	2.413	2.548	2.055	0.1695	-0.3031	-0.5219	-0.3869	-0.8802	0.364161	0.088603	0.014581	0.077526	0.032832
A0A0B4J2B4	RPS15	0.2221	0.05267	0.1265	0.1356	0.4308	0.246	0.1695	-0.09566	-0.08658	0.2087	0.02385	0.789282	0.785374	0.896532	0.604435	0.954728
E9PNS2	RBBP4	1.54	1.37	1.817	1.4	1.72	1.693	0.1692	0.2777	-0.1399	0.18	0.1531	0.489371	0.161436	0.583945	0.341717	0.491873
D6R9D3	HNRNPH1	3.679	3.51	2.895	4.16	3.636	3.612	0.1681	-0.7831	0.4815	-0.04239	-0.06694	0.791855	0.2745	0.632022	0.954332	0.913444
Q9NRV9	HEBP1	-6.934	-7.102	-6.189	-4.622	-5.375	-6.958	0.168	0.5846	2.152	1.398	-0.0245	0.658105	0.413495	0.10755	0.067739	0.724676
P35908	KRT2	-0.01334	-0.18	-1.897	-0.1089	-0.1141	-0.6804	0.1667	-1.884	-0.09556	-0.1007	-0.6671	0.828764	0.024029	0.873902	0.897126	0.483938
Q9H3K6	BOLA2; BOLA2B	3.769	3.604	2.878	3.255	3.654	3.59	0.1657	-0.8909	-0.5141	-0.1154	-0.1797	0.450566	0.000541	0.029837	0.299516	0.326978
P06737	PYGL	1.103	0.9388	1.638	1.537	1.319	1.298	0.1644	0.5352	0.4342	0.2109	0.1898	0.63919	0.183997	0.012608	0.515601	0.515393
A0A6Q8PFC4	TFG	-0.2455	-0.4082	0.8448	-0.3515	0.2178	-0.3403	0.1627	1.09	-0.106	0.4633	-0.09478	0.783279	0.040434	0.814727	0.234427	0.851193
F8VYY1	CDK4	-1.116	-1.279	-2.184	-1.356	-2.127	-0.627	0.1626	-1.067	-0.2398	-1.011	0.4891	0.914568	0.462336	0.871468	0.587228	0.726232
P30153	PPP2R1A	4.603	4.442	4.8	4.774	4.643	4.781	0.1612	0.1974	0.1711	0.04067	0.1783	0.448823	0.490092	0.58963	0.866298	0.409785
P46783	RPS10	3.109	2.948	2.513	2.803	2.968	3.117	0.161	-0.5953	-0.3057	-0.1407	0.008416	0.587139	0.108064	0.479906	0.538619	0.968937
F6Y5H0	RBMS1	-0.6578	-0.8171	-0.3792	0.1945	-3.094	-4.473	0.1593	0.2787	0.8524	-2.436	-3.815	0.885614	0.799155	0.372946	0.109545	0.024064
F8VPD4	CAD	4.869	4.71	4.028	4.23	3.932	4.01	0.159	-0.8413	-0.639	-0.937	-0.8592	0.78566	0.010565	0.03596	0.006752	0.010142
Q9BTV4	TMEM43	-0.1853	-0.3437	1.038	-0.4899	0.4434	1.612	0.1583	1.223	-0.3046	0.6287	1.797	0.870504	0.163334	0.759158	0.637348	0.052638
C9JL85	MTPN	2.372	2.213	2.526	2.444	2.151	1.702	0.1582	0.1547	0.07271	-0.2204	-0.6691	0.554498	0.560418	0.822382	0.426062	0.034114
P09496	CLTA	2.021	1.863	1.791	1.491	1.549	1.973	0.1578	-0.2298	-0.5304	-0.4722	-0.04808	0.559938	0.544229	0.235181	0.342217	0.877187
P19404	NDUFV2	0.119	-0.03712	-0.5001	-0.4094	-0.8163	-0.3983	0.1561	-0.6192	-0.5285	-0.9353	-0.5174	0.793745	0.025551	0.061114	0.279118	0.013351
Q9NV70	EXOC1	-0.7628	-0.9169	-1.796	-3.908	-1.627	-1.882	0.1541	-1.033	-3.146	-0.8642	-1.119	0.831193	0.00206	0.063044	0.104356	0.065907
P61081	UBE2M	2.164	2.011	2.228	2.211	2.007	1.832	0.1531	0.06387	0.04665	-0.1568	-0.3325	0.294335	0.764876	0.785028	0.449653	0.070584
F8VXL2	DYNLL1	0.411	0.2581	1.113	1.65	0.7434	0.9231	0.1529	0.7018	1.239	0.3324	0.5121	0.867865	0.244614	0.035767	0.453124	0.095794
O00154	ACOT7	4.112	3.959	4.022	3.679	4.105	4.408	0.1521	-0.08958	-0.4325	-0.006394	0.2962	0.563655	0.48836	0.019253	0.95062	0.253356
J3QQQ9	J3QQQ9	3.33	3.179	2.249	3.142	3.234	3.356	0.1518	-1.081	-0.1884	-0.09688	0.026	0.779603	0.081823	0.775097	0.805574	0.941193
J3QQV1	RPL26	3.33	3.179	2.249	3.142	3.234	3.356	0.1518	-1.081	-0.1884	-0.09688	0.026	0.779603	0.081823	0.775097	0.805574	0.941193
A0A6Q8PFA9	GLA	0.8958	0.7442	0.8021	2.305	0.03891	0.7983	0.1516	-0.09375	1.409	-0.8569	-0.09748	0.816049	0.877148	0.061742	0.258211	0.885676
A0A2U3TZV8	PLCH1	0.4968	0.3451	1.187	0.2961	1.505	0.05266	0.1516	0.6901	-0.2007	1.008	-0.4441	0.573297	0.102664	0.316377	0.091317	0.337012
Q9NYH9	UTP6	-0.2008	-0.3508	0.6875	0.1928	-0.171	0.1008	0.1501	0.8883	0.3936	0.0298	0.3015	0.835008	0.124018	0.596658	0.964051	0.474142
F8WEM5	CBLL1	-4.031	-4.181	-5.152	-4.95	-3.974	-3.062	0.1498	-1.12	-0.9187	0.05708	0.9692	0.927577	0.489427	0.53309	0.973036	0.53297
A0A0C4DG06	LRPPRC	3.878	3.729	3.788	3.694	3.873	4.168	0.1491	-0.08974	-0.1845	-0.004925	0.2901	0.543904	0.744546	0.495337	0.987268	0.191105
P13639	EEF2	7.907	7.759	7.513	7.557	7.752	7.919	0.1487	-0.394	-0.3499	-0.1552	0.01181	0.737863	0.162276	0.295045	0.586708	0.961283
P21399	ACO1	0.945	0.7976	1.648	0.9633	1.589	1.422	0.1475	0.7027	0.01825	0.6442	0.4768	0.748417	0.109454	0.925927	0.128702	0.170381
Q92522	H1-10	2.049	1.901	2.421	2.087	2.523	2.311	0.1475	0.3723	0.03782	0.4741	0.2621	0.568084	0.108996	0.836145	0.05324	0.259924
B0QZ65	GAPVD1	-1.233	-1.38	-1.076	-1.416	-0.2741	-0.6735	0.1463	0.1573	-0.1829	0.9593	0.5599	0.875331	0.837814	0.809006	0.24255	0.50799
F2Z388	RPL35	3.023	2.877	3.184	3.511	3.166	2.629	0.1458	0.161	0.4884	0.1435	-0.3942	0.75049	0.767341	0.254803	0.72273	0.532679
E9PNB9	RAB30	1.285	1.14	1.212	1.236	1.336	1.453	0.1453	-0.0729	-0.04945	0.05116	0.1683	0.394482	0.852187	0.836378	0.867183	0.37368
C9J0I9	ZC3HC1	-0.8566	-1.002	-0.9391	-1.458	-1.266	-0.9356	0.1452	-0.08253	-0.6018	-0.4098	-0.07905	0.897733	0.837785	0.221311	0.703032	0.927018
F8VZJ2	NACA	3.694	3.549	3.64	4.07	3.759	3.337	0.1444	-0.05326	0.3767	0.06522	-0.3566	0.641124	0.904568	0.398715	0.845422	0.299777
Q86X10	RALGAPB	-1.3	-1.445	-2.483	-1.55	-1.341	-0.6811	0.1444	-1.183	-0.2496	-0.04076	0.6191	0.886828	0.106846	0.771077	0.957663	0.38004
Q12972	PPP1R8	0.7626	0.6186	0.9765	0.5114	1.098	1.038	0.144	0.2139	-0.2512	0.3355	0.2756	0.533654	0.24767	0.597042	0.290376	0.100452
P20337	RAB3B	1.284	1.14	1.135	1.236	1.317	1.339	0.1436	-0.1486	-0.04776	0.03315	0.05529	0.399258	0.726483	0.841803	0.915358	0.755431
P27105	STOM	-4.304	-4.448	-6.551	-6.339	-3.388	-6.951	0.1434	-2.246	-2.034	0.9162	-2.647	0.940857	0.171018	0.223643	0.585464	0.126031
P14209	CD99	-0.3287	-0.4721	-2.277	-2.868	-2.171	-0.5783	0.1433	-1.949	-2.54	-1.842	-0.2496	0.93791	0.049012	0.199184	0.147656	0.627136
P62877	RBX1	1.216	1.074	1.207	0.5626	0.2312	0.8356	0.1424	-0.009315	-0.6534	-0.9848	-0.3804	0.574088	0.957247	0.172849	0.175994	0.378827
O60942	RNGTT	-0.4309	-0.5732	-1.374	-1.432	-0.5528	-1.286	0.1423	-0.9428	-1.001	-0.1219	-0.8549	0.728333	0.090468	0.034787	0.866867	0.053491
P19367	HK1	1.886	1.744	1.795	1.941	1.769	1.745	0.1416	-0.09043	0.05568	-0.1165	-0.1408	0.809651	0.645076	0.872653	0.756482	0.587356
Q96F63	CCDC97	-0.8171	-0.9582	-1.173	-3.122	-0.2849	-1.095	0.1411	-0.3557	-2.305	0.5322	-0.2776	0.781316	0.377913	0.165255	0.465322	0.58041
P30622	CLIP1	0.7569	0.6162	0.4445	-0.3162	-0.1696	0.1241	0.1406	-0.3124	-1.073	-0.9265	-0.6328	0.844146	0.60398	0.078785	0.07418	0.239428
A0A096LNY5	ADSL	2.026	1.885	1.428	2.36	2.309	2.155	0.1403	-0.5983	0.3347	0.2837	0.1294	0.656913	0.053974	0.315815	0.436695	0.613129
P55210	CASP7	-2.184	-2.323	-1.217	-1.008	-1.498	-2.638	0.1395	0.9672	1.176	0.6859	-0.4543	0.824357	0.165927	0.161575	0.324432	0.558464
Q9UMS4	PRPF19	4.291	4.152	4.301	4.23	4.047	4.025	0.1389	0.01056	-0.06008	-0.2439	-0.2653	0.662557	0.97032	0.829139	0.424785	0.317227
Q32P28	P3H1	-1.143	-1.281	-0.7667	-0.7574	-0.3636	-0.7902	0.1384	0.376	0.3853	0.7791	0.3525	0.863844	0.161952	0.129697	0.13413	0.413519
P0C0S5	H2AZ1	2.931	2.793	2.687	3.298	2.644	2.686	0.1374	-0.2441	0.3672	-0.2862	-0.2445	0.841622	0.695242	0.508659	0.663677	0.68339
Q71UI9	H2AZ2	2.931	2.793	2.687	3.298	2.644	2.686	0.1374	-0.2441	0.3672	-0.2862	-0.2445	0.841622	0.695242	0.508659	0.663677	0.68339
K7EIG7	MYO1D	0.9439	0.8067	0.625	-0.4082	1.375	1.119	0.1372	-0.3188	-1.352	0.4307	0.1748	0.874306	0.742863	0.183211	0.658037	0.856305
H3BQ52	ARPP19	-0.09288	-0.2283	0.1832	-0.5387	-0.4973	0.08251	0.1355	0.276	-0.4459	-0.4044	0.1754	0.914853	0.72346	0.123494	0.799273	0.614323
Q8TCZ2	CD99L2	-2.336	-2.472	-2.421	-2.125	-3.15	-2.214	0.1355	-0.08475	0.2111	-0.8134	0.1227	0.748251	0.757711	0.497202	0.447603	0.682649
O00299	CLIC1	4.273	4.138	4.405	4.515	4.386	5.163	0.1353	0.1314	0.2421	0.1126	0.8901	0.782215	0.776137	0.57572	0.711861	0.031861
A0A6Q8PFE0	GNB4	-2.724	-2.858	-6.065	-3.458	-2.626	-4.247	0.1346	-3.341	-0.7342	0.09728	-1.523	0.922257	0.027489	0.677601	0.958976	0.232589
Q02878	RPL6	4.874	4.74	4.703	4.838	5.026	4.9	0.1344	-0.1711	-0.03678	0.152	0.02548	0.536734	0.397042	0.854916	0.139534	0.777168
F8W0J4	YEATS4	-1.593	-1.727	-0.1244	-0.7658	-4.02	-0.171	0.1342	1.468	0.827	-2.427	1.422	0.951786	0.225192	0.561692	0.066219	0.317476
Q9NQC3	RTN4	-0.7018	-0.8352	0.1883	0.9685	0.8202	0.6236	0.1334	0.8901	1.67	1.522	1.325	0.927006	0.414131	0.163722	0.221489	0.266683
K7ER08	RBM42	-1.517	-1.649	-1.901	-5.599	-1.112	-1.528	0.1316	-0.3836	-0.05455	0.4047	-0.01062	0.909282	0.647404	0.969134	0.461741	0.986901
Q6EEV4	POLR2M	-1.75	-1.881	-0.6126	-1.821	-1.12	-2.261	0.1311	1.137	-0.07162	0.6299	-0.5109	0.926612	0.274149	0.945644	0.586506	0.627446
Q9Y6K9	IKBKG	-0.2317	-0.3627	-0.3673	-1.241	-0.1941	-0.9549	0.131	-0.1357	-1.009	0.0376	-0.7232	0.884792	0.881276	0.298844	0.970992	0.422036
Q9BYD2	MRPL9	-1.463	-1.593	-1.924	-2.593	-1.696	-3.036	0.1296	-0.4613	-1.13	-0.2335	-1.573	0.818589	0.194271	0.466899	0.575279	0.167694
J3KN66	TOR1AIP1	1.858	1.728	1.929	2.327	1.814	1.517	0.1296	0.07119	0.4697	-0.04409	-0.3403	0.346658	0.653506	0.00429	0.680036	0.408214
P30405	PPIF	2.828	2.699	2.402	2.142	2.547	2.928	0.1287	-0.4259	-0.6853	-0.2808	0.1003	0.652058	0.198489	0.117989	0.367927	0.603431
Q15020	SART3	1.334	1.206	1.357	0.7651	1.447	0.9288	0.1285	0.02263	-0.5692	0.1124	-0.4056	0.776165	0.954851	0.131136	0.799334	0.241971
Q01085	TIAL1	-0.9403	-1.069	-0.2792	-0.5344	-0.8226	-1.335	0.1282	0.6612	0.4059	0.1177	-0.3952	0.810755	0.155621	0.332473	0.755642	0.583573
Q8MH48	HLA-G	-6.141	-6.269	-3.43	-5.931	-6.324	-5.155	0.1279	2.711	0.2094	-0.183	0.9858	0.936291	0.159387	0.902806	0.910076	0.55761
C9J0J7	PFN2	-1.466	-1.592	-1.627	-0.7749	-1.381	-1.525	0.1258	-0.161	0.6912	0.08535	-0.05864	0.908102	0.873895	0.459438	0.930358	0.953659
O75976	CPD	1.456	1.331	1.662	1.07	2.04	1.788	0.1246	0.2063	-0.3859	0.5842	0.3317	0.878052	0.526642	0.316152	0.388949	0.602846
Q9UKK9	NUDT5	3.021	2.897	3.366	3.039	3.126	2.942	0.1241	0.3453	0.01775	0.1053	-0.0791	0.767979	0.13548	0.929741	0.656023	0.772849
Q9NWT6	HIF1AN	0.8853	0.7615	1.001	-0.05712	1.278	1.208	0.1238	0.1152	-0.9425	0.3923	0.3229	0.831263	0.760627	0.117977	0.487479	0.560805
X6R5C5	CTSA	-1.409	-1.532	-0.4721	-0.7032	-0.2042	-0.8062	0.1232	0.9366	0.7056	1.205	0.6025	0.871523	0.097886	0.106254	0.038002	0.180012
Q7Z7L1	SLFN11	1.3	1.18	0.6825	1.462	1.415	1.036	0.1204	-0.6179	0.1617	0.1144	-0.2642	0.5347	0.079869	0.566869	0.752057	0.14417
P12004	PCNA	4.821	4.701	4.572	4.612	4.78	5.002	0.1201	-0.2496	-0.2092	-0.04157	0.1805	0.612581	0.225927	0.281925	0.745176	0.274261
O14654	IRS4	3.771	3.651	3.541	3.564	3.561	3.76	0.1195	-0.2295	-0.2068	-0.21	-0.01056	0.651864	0.157541	0.261016	0.365872	0.937686
Q8IV08	PLD3	2.284	2.164	2.802	2.379	2.478	2.028	0.1192	0.5185	0.09586	0.194	-0.255	0.61289	0.098523	0.721308	0.472335	0.415332
Q99733	NAP1L4	2.86	2.742	2.588	2.813	2.912	2.9	0.1182	-0.2727	-0.04721	0.05179	0.03958	0.650849	0.284782	0.888845	0.814088	0.884692
O94992	HEXIM1	-0.2101	-0.3273	0.1856	0.139	0.05178	-0.344	0.1172	0.3957	0.3492	0.2619	-0.1339	0.785935	0.287842	0.371865	0.505206	0.717598
O95169	NDUFB8	-1.593	-1.709	-0.06012	0.3228	-1.709	-0.3954	0.1165	1.533	1.916	-0.1163	1.197	0.857476	0.046361	0.088689	0.785908	0.050624
Q16576	RBBP7	5.225	5.109	4.625	5.5	5.003	5.51	0.116	-0.5998	0.2751	-0.2223	0.2855	0.702774	0.01061	0.047275	0.440869	0.356067
Q15008	PSMD6	2.584	2.469	2.266	2.523	2.612	2.518	0.1157	-0.318	-0.06139	0.02757	-0.06599	0.736213	0.231175	0.859127	0.940111	0.789015
P62910	RPL32	2.849	2.733	2.802	2.66	2.732	2.868	0.1155	-0.04719	-0.1889	-0.1167	0.01938	0.524569	0.867268	0.48788	0.455727	0.915079
Q9BQC3	DPH2	-2.572	-2.687	-3.649	-4.341	-3.377	-3.575	0.1149	-1.078	-1.769	-0.8054	-1.003	0.910799	0.173012	0.188836	0.481741	0.175679
O14818	PSMA7	3.257	3.143	3.391	3.878	3.763	3.8	0.1145	0.1337	0.6206	0.5062	0.5431	0.839447	0.460648	0.006459	0.072351	0.02376
Q8TBX8	PIP4K2C	-2.205	-2.319	-2.613	-1.373	-3.543	-3.167	0.1139	-0.4083	0.8321	-1.338	-0.9615	0.873479	0.399794	0.086301	0.21069	0.133451
P46777	RPL5	5.321	5.209	5.427	4.731	5.421	5.251	0.1126	0.1058	-0.5905	0.09934	-0.07024	0.422875	0.325837	0.098728	0.401305	0.811386
G5EA36	CDC27	-0.7647	-0.8767	-1.656	-1.487	-2.517	-1.616	0.112	-0.8916	-0.7225	-1.753	-0.8513	0.907725	0.244731	0.378058	0.160188	0.443487
Q99961	SH3GL1	1.586	1.474	0.9812	1.123	1.327	1.72	0.1113	-0.6045	-0.4625	-0.2588	0.1339	0.893984	0.458462	0.507539	0.719093	0.83327
Q9NWS0	PIH1D1	-0.7047	-0.8157	-0.4306	-0.7052	-0.7862	-0.5823	0.111	0.2741	-0.000494	-0.08147	0.1224	0.781152	0.42702	0.998766	0.76703	0.794276
L0R6Q1	SLC35A4	-5.014	-5.125	-5.181	-3.539	-2.702	-3.539	0.111	-0.1665	1.476	2.312	1.476	0.941321	0.906915	0.325853	0.147185	0.325275
K7EPV0	COA3	0.2494	0.1388	-1.065	-0.2097	0.585	-0.5698	0.1106	-1.314	-0.4591	0.3356	-0.8191	0.810928	0.236351	0.295635	0.272114	0.564447
A0A0A0MTS7	TTN	5	4.89	4.786	5.329	4.963	4.811	0.1101	-0.2141	0.3291	-0.03722	-0.1888	0.832963	0.362672	0.354474	0.86823	0.122304
Q92979	EMG1	-1.792	-1.901	-1.175	-0.6841	-0.8219	-2.288	0.1097	0.6167	1.108	0.9698	-0.4959	0.926557	0.273606	0.331439	0.321704	0.33533
F5H282	TCP1	4.518	4.409	4.613	4.902	4.423	4.506	0.1096	0.09443	0.3838	-0.09511	-0.01199	0.512574	0.566425	0.054015	0.463942	0.905723
Q92945	KHSRP	5.727	5.618	5.477	5.485	5.482	5.35	0.1094	-0.2495	-0.2415	-0.2454	-0.377	0.812004	0.051888	0.070627	0.044021	0.03912
Q8NFH3	NUP43	0.3161	0.2074	0.5805	0.3934	0.2803	0.3912	0.1087	0.2644	0.07727	-0.03578	0.07513	0.755171	0.175956	0.721152	0.912209	0.800695
O15226	NKRF	-0.2915	-0.3998	-0.5967	-2.799	-0.6782	-1.747	0.1083	-0.3051	-2.508	-0.3866	-1.455	0.797674	0.232194	0.032165	0.241744	0.139417
Q70Z53	FRA10AC1	-3.825	-3.933	-5.934	-3.785	-3.343	-3.077	0.1079	-2.109	0.03961	0.4817	0.7483	0.929908	0.1951	0.966356	0.608374	0.334733
A0A087WUV8	BSG	1.332	1.224	1.388	1.855	1.523	1.651	0.1077	0.05622	0.5231	0.191	0.3192	0.756592	0.883837	0.117427	0.625482	0.33544
Q13823	GNL2	-0.489	-0.5967	-0.5475	-0.5469	-1.354	-1.022	0.1077	-0.05846	-0.05789	-0.8646	-0.533	0.877724	0.849107	0.852454	0.288906	0.494028
Q8IZP2	ST13P4	3.379	3.272	4.131	4.01	3.698	3.461	0.1074	0.7519	0.6311	0.3192	0.08218	0.735086	0.019582	0.157206	0.242962	0.80597
O75223	GGCT	0.9953	0.888	1.082	0.9237	0.6742	1.042	0.1073	0.08649	-0.07163	-0.3211	0.04716	0.852497	0.688333	0.891416	0.488543	0.927335
Q96EY7	PTCD3	-0.9026	-1.009	-0.6618	-0.3319	-0.8158	-1.039	0.1065	0.2409	0.5707	0.08687	-0.1361	0.480832	0.385563	0.162453	0.711704	0.724958
F8WDD7	ARPC4	1.326	1.22	1.456	1.259	1.522	0.3806	0.1062	0.1301	-0.06719	0.1963	-0.9454	0.92573	0.622865	0.848418	0.316509	0.235242
Q68EM7	ARHGAP17	-0.9783	-1.083	-0.7851	-1.147	-0.332	-0.3495	0.1043	0.1932	-0.1685	0.6463	0.6287	0.729384	0.715639	0.757677	0.087088	0.17227
A0A087WTV6	PYCR2	1.179	1.075	1.789	1.628	2.211	1.676	0.1038	0.6101	0.4492	1.032	0.4973	0.846015	0.110129	0.106852	0.017617	0.039891
Q8NBY1	STK26	3.249	3.147	3.613	3.564	3.127	3.794	0.1023	0.3639	0.3144	-0.1226	0.5447	0.898624	0.535317	0.676209	0.881633	0.428897
Q8WXI9	GATAD2B	1.019	0.917	0.4866	-0.1198	-0.1021	0.7163	0.1021	-0.5325	-1.139	-1.121	-0.3028	0.885251	0.145902	0.014843	0.030422	0.483834
F8WBU5	RNF181	-3.205	-3.306	-3.687	-3.614	-2.426	-2.683	0.1008	-0.4815	-0.4092	0.7791	0.5217	0.910544	0.625704	0.71259	0.377546	0.580013
O75179	ANKRD17	0.1831	0.08278	0.3744	-0.6675	-0.6329	0.724	0.1004	0.1913	-0.8506	-0.816	0.5409	0.827722	0.797444	0.045753	0.234196	0.512443
O60563	CCNT1	-1.439	-1.539	-2.257	-2.136	-2.824	-2.269	0.09989	-0.8184	-0.6971	-1.385	-0.8298	0.94569	0.461012	0.332472	0.358972	0.350949
H0YK49	ETFA	2.537	2.437	2.438	2.097	2.329	2.492	0.09952	-0.09931	-0.4396	-0.2078	-0.04505	0.633979	0.625098	0.155434	0.475262	0.923941
I3L2W3	NUP88	-6.863	-6.962	-6.799	-1.855	-4.311	-1.052	0.09877	0.06427	5.008	2.552	5.81	0.865238	0.582642	0.01513	0.209979	0.019364
Q96HS1	PGAM5	2.199	2.101	2.239	2.222	2.086	2.116	0.0982	0.04028	0.02321	-0.1126	-0.08292	0.839414	0.856447	0.952041	0.798346	0.839377
Q15738	NSDHL	0.1497	0.05195	0.1174	0.1783	0.1315	-0.3108	0.09775	-0.03226	0.02864	-0.01818	-0.4605	0.905423	0.925596	0.958512	0.930853	0.62492
P26038	MSN	3.072	2.975	2.495	2.725	2.915	2.931	0.0965	-0.5767	-0.3465	-0.1572	-0.1406	0.730523	0.089133	0.291269	0.640478	0.637854
Q8TB61	SLC35B2	-2.557	-2.653	-3.708	-3.245	-3.323	-1.439	0.09612	-1.151	-0.688	-0.7659	1.118	0.936657	0.435284	0.7012	0.652231	0.361561
Q15043	SLC39A14	-2.532	-2.624	-2.5	-6.398	-4.765	-3.112	0.09273	0.03197	-3.867	-2.233	-0.5803	0.93382	0.973649	0.000884	0.178996	0.638482
Q9NSE4	IARS2	2.092	2	2.794	2.225	2.945	2.215	0.09268	0.7014	0.133	0.8529	0.1226	0.637827	0.103776	0.69297	0.14099	0.619626
P62987	UBA52	5.22	5.128	5.201	5.083	5.21	5.048	0.09229	-0.019	-0.1371	-0.01005	-0.1725	0.779813	0.944046	0.509838	0.959571	0.399442
B4DV12	UBB	5.22	5.128	5.201	5.083	5.21	5.048	0.09229	-0.019	-0.1371	-0.01005	-0.1725	0.779813	0.944046	0.509838	0.959571	0.399442
Q96C32	UBC	5.22	5.128	5.201	5.083	5.21	5.048	0.09229	-0.019	-0.1371	-0.01005	-0.1725	0.779813	0.944046	0.509838	0.959571	0.399442
F8WBR5	CALM2	-6.146	-6.238	-2.444	-3.375	-5.603	-2.242	0.09171	3.703	2.772	0.5437	3.905	0.942191	0.021939	0.140999	0.619892	0.041787
P60842	EIF4A1	6.637	6.545	6.226	6.397	6.522	6.255	0.09162	-0.411	-0.2394	-0.1151	-0.3818	0.691024	0.035826	0.186368	0.518565	0.055791
B6VEX4	ABI1	0.6094	0.5193	1.715	1.808	0.5899	1.802	0.09012	1.106	1.199	-0.01954	1.192	0.900406	0.240933	0.165751	0.983008	0.242881
Q8TBC4	UBA3	0.7979	0.7082	1.354	-0.07436	1.299	0.1473	0.08968	0.5566	-0.8723	0.5014	-0.6506	0.922708	0.607399	0.086777	0.725478	0.346109
A0A7P0T9T8	DDX20	0.3328	0.2453	0.4267	1.233	1.224	1.376	0.08751	-0.04664	0.9002	0.8917	1.043	0.835917	0.894558	0.090886	0.122786	0.146806
A0A0C4DG89	DDX46	3.606	3.519	3.313	3.483	3.372	3.548	0.08714	-0.2931	-0.1232	-0.2334	-0.05834	0.637634	0.125799	0.442278	0.255689	0.80439
P01111	NRAS	-0.07105	-0.158	0.2866	0.5256	0.5933	-0.4818	0.08693	0.3576	0.5967	0.6644	-0.4107	0.869438	0.370624	0.12594	0.167904	0.258662
Q96ST3	SIN3A	-0.6995	-0.7862	0.02817	0.1353	0.5161	0.2608	0.08666	0.7277	0.8348	1.216	0.9603	0.914429	0.244769	0.178202	0.074755	0.187786
B2R5W2	HNRNPC	5.88	5.796	6.208	5.972	5.892	5.974	0.08397	0.3278	0.09225	0.01185	0.09346	0.704252	0.256674	0.583307	0.945104	0.670312
P45954	ACADSB	0.08354	0.0007528	-0.01254	0.3205	-0.02037	0.3618	0.08279	-0.09608	0.237	-0.1039	0.2782	0.906565	0.752092	0.469768	0.815489	0.220816
A0A7I2V4H4	DCTN2	2.659	2.577	2.421	2.229	2.498	2.5	0.08272	-0.238	-0.4307	-0.1614	-0.1597	0.77603	0.301309	0.225525	0.674451	0.699419
P35637	FUS	2.69	2.608	3.406	3.803	2.936	2.913	0.08202	0.7155	1.113	0.2454	0.2228	0.844999	0.030532	0.067558	0.493251	0.491739
A0A0A6YYH1	C15orf38-AP3S2	-0.2476	-0.3287	-0.7457	-0.01825	-0.6621	-1.376	0.08109	-0.4981	0.2294	-0.4144	-1.129	0.892752	0.397392	0.584392	0.505958	0.029621
P46109	CRKL	1.391	1.31	0.9682	1.424	0.7097	0.9637	0.08104	-0.4232	0.03238	-0.6817	-0.4278	0.847763	0.307823	0.948931	0.089373	0.301273
P62277	RPS13	4.599	4.518	4.229	4.527	4.338	4.499	0.08056	-0.3698	-0.07148	-0.2614	-0.09962	0.768419	0.248296	0.806828	0.294544	0.679994
[truncated: 1,909 more rows]
